# Supplementary material for: Mechanism of N-0385 blocking SARS-CoV-2 to treat COVID-19 based on molecular docking and molecular dynamics
Source: Front Microbiol. 2022 Oct 18;13:1013911. doi: 10.3389/fmicb.2022.1013911 (PMC9622768; doi:10.3389/fmicb.2022.1013911)
Supplement: Supplementary file 1 [file Table_1.XLSX]

## Sheet: Genecard-COVID19
Gene Symbol	Description	Category	Gifts	GC Id	Relevance score	GeneCards Link
ACE2	Angiotensin Converting Enzyme 2	Protein Coding	48	GC0XM015494	33.9336	https://www.genecards.org/cgi-bin/carddisp.pl?gene=ACE2
TLR7	Toll Like Receptor 7	Protein Coding	46	GC0XP012867	23.9783	https://www.genecards.org/cgi-bin/carddisp.pl?gene=TLR7
IL6	Interleukin 6	Protein Coding	48	GC07P022725	22.2499	https://www.genecards.org/cgi-bin/carddisp.pl?gene=IL6
TMPRSS2	Transmembrane Serine Protease 2	Protein Coding	45	GC21M041464	19.6073	https://www.genecards.org/cgi-bin/carddisp.pl?gene=TMPRSS2
CRP	C-Reactive Protein	Protein Coding	45	GC01M159725	15.9421	https://www.genecards.org/cgi-bin/carddisp.pl?gene=CRP
TNNI3	Troponin I3, Cardiac Type	Protein Coding	48	GC19M055151	14.5716	https://www.genecards.org/cgi-bin/carddisp.pl?gene=TNNI3
TNF	Tumor Necrosis Factor	Protein Coding	50	GC06P076864	14.3125	https://www.genecards.org/cgi-bin/carddisp.pl?gene=TNF
IL10	Interleukin 10	Protein Coding	46	GC01M206767	13.3748	https://www.genecards.org/cgi-bin/carddisp.pl?gene=IL10
NLRP3	NLR Family Pyrin Domain Containing 3	Protein Coding	46	GC01P247415	13.0805	https://www.genecards.org/cgi-bin/carddisp.pl?gene=NLRP3
F3	Coagulation Factor III, Tissue Factor	Protein Coding	45	GC01M094570	12.959	https://www.genecards.org/cgi-bin/carddisp.pl?gene=F3
DPP4	Dipeptidyl Peptidase 4	Protein Coding	49	GC02M161992	12.4113	https://www.genecards.org/cgi-bin/carddisp.pl?gene=DPP4
HLA-A	Major Histocompatibility Complex, Class I, A	Protein Coding	46	GC06P076821	11.8153	https://www.genecards.org/cgi-bin/carddisp.pl?gene=HLA-A
IL4	Interleukin 4	Protein Coding	45	GC05P132673	11.8151	https://www.genecards.org/cgi-bin/carddisp.pl?gene=IL4
ACE	Angiotensin I Converting Enzyme	Protein Coding	50	GC17P063477	11.7299	https://www.genecards.org/cgi-bin/carddisp.pl?gene=ACE
TLR4	Toll Like Receptor 4	Protein Coding	50	GC09P117704	11.682	https://www.genecards.org/cgi-bin/carddisp.pl?gene=TLR4
APOE	Apolipoprotein E	Protein Coding	50	GC19P051999	11.6413	https://www.genecards.org/cgi-bin/carddisp.pl?gene=APOE
IFNA2	Interferon Alpha 2	Protein Coding	42	GC09M021384	11.3755	https://www.genecards.org/cgi-bin/carddisp.pl?gene=IFNA2
NRP1	Neuropilin 1	Protein Coding	45	GC10M033177	11.105	https://www.genecards.org/cgi-bin/carddisp.pl?gene=NRP1
ABO	ABO, Alpha 1-3-N-Acetylgalactosaminyltransferase And Alpha 1-3-Galactosyltransferase	Protein Coding	37	GC09M133250	10.9149	https://www.genecards.org/cgi-bin/carddisp.pl?gene=ABO
HLA-C	Major Histocompatibility Complex, Class I, C	Protein Coding	45	GC06M061260	10.7133	https://www.genecards.org/cgi-bin/carddisp.pl?gene=HLA-C
IL2RA	Interleukin 2 Receptor Subunit Alpha	Protein Coding	49	GC10M006010	10.7027	https://www.genecards.org/cgi-bin/carddisp.pl?gene=IL2RA
AR	Androgen Receptor	Protein Coding	51	GC0XP067544	10.3707	https://www.genecards.org/cgi-bin/carddisp.pl?gene=AR
NPPB	Natriuretic Peptide B	Protein Coding	43	GC01M011858	9.98545	https://www.genecards.org/cgi-bin/carddisp.pl?gene=NPPB
IL1B	Interleukin 1 Beta	Protein Coding	46	GC02M112829	9.87245	https://www.genecards.org/cgi-bin/carddisp.pl?gene=IL1B
LOC117134593	ACE2 Promoter Region	Biological Region	2	GC0XP015600	9.68434	https://www.genecards.org/cgi-bin/carddisp.pl?gene=LOC117134593
EGFR	Epidermal Growth Factor Receptor	Protein Coding	52	GC07P055019	9.59044	https://www.genecards.org/cgi-bin/carddisp.pl?gene=EGFR
OAS1	2'-5'-Oligoadenylate Synthetase 1	Protein Coding	44	GC12P112918	9.39343	https://www.genecards.org/cgi-bin/carddisp.pl?gene=OAS1
SLC6A20	Solute Carrier Family 6 Member 20	Protein Coding	41	GC03M045755	9.18124	https://www.genecards.org/cgi-bin/carddisp.pl?gene=SLC6A20
LOC117135106	TMPRSS2 Androgen Receptor-Responsive -60 Kb Enhancer	Biological Region	2	GC21P041568	8.98646	https://www.genecards.org/cgi-bin/carddisp.pl?gene=LOC117135106
LOC117134608	TMPRSS2 Androgen Receptor-Responsive -13 Kb Enhancer	Biological Region	2	GC21P041519	8.98646	https://www.genecards.org/cgi-bin/carddisp.pl?gene=LOC117134608
LOC117134604	TMPRSS2 Promoter Region	Biological Region	2	GC21P041507	8.98017	https://www.genecards.org/cgi-bin/carddisp.pl?gene=LOC117134604
LOC112679198	ABO +5.8 Intron 1 Enhancer	Biological Region	2	GC09P133267	8.89809	https://www.genecards.org/cgi-bin/carddisp.pl?gene=LOC112679198
IL22	Interleukin 22	Protein Coding	41	GC12M068248	8.80221	https://www.genecards.org/cgi-bin/carddisp.pl?gene=IL22
ARNTL	Aryl Hydrocarbon Receptor Nuclear Translocator Like	Protein Coding	41	GC11P013276	8.65159	https://www.genecards.org/cgi-bin/carddisp.pl?gene=ARNTL
F2	Coagulation Factor II, Thrombin	Protein Coding	48	GC11P046720	8.46279	https://www.genecards.org/cgi-bin/carddisp.pl?gene=F2
ADAM17	ADAM Metallopeptidase Domain 17	Protein Coding	50	GC02M009488	8.36421	https://www.genecards.org/cgi-bin/carddisp.pl?gene=ADAM17
IFNG	Interferon Gamma	Protein Coding	47	GC12M068154	8.07784	https://www.genecards.org/cgi-bin/carddisp.pl?gene=IFNG
CCR9	C-C Motif Chemokine Receptor 9	Protein Coding	40	GC03P046268	7.87815	https://www.genecards.org/cgi-bin/carddisp.pl?gene=CCR9
IFNB1	Interferon Beta 1	Protein Coding	42	GC09M021077	7.58944	https://www.genecards.org/cgi-bin/carddisp.pl?gene=IFNB1
IFNA1	Interferon Alpha 1	Protein Coding	40	GC09P021577	7.4002	https://www.genecards.org/cgi-bin/carddisp.pl?gene=IFNA1
CD99	CD99 Molecule (Xg Blood Group)	Protein Coding	39	GC0XP002691	6.41895	https://www.genecards.org/cgi-bin/carddisp.pl?gene=CD99
INS	Insulin	Protein Coding	46	GC11M002159	6.31271	https://www.genecards.org/cgi-bin/carddisp.pl?gene=INS
CD8A	CD8a Molecule	Protein Coding	45	GC02M086784	6.20338	https://www.genecards.org/cgi-bin/carddisp.pl?gene=CD8A
CCL17	C-C Motif Chemokine Ligand 17	Protein Coding	38	GC16P057411	6.13634	https://www.genecards.org/cgi-bin/carddisp.pl?gene=CCL17
CSF2	Colony Stimulating Factor 2	Protein Coding	42	GC05P132073	6.09223	https://www.genecards.org/cgi-bin/carddisp.pl?gene=CSF2
FCGR3A	Fc Gamma Receptor IIIa	Protein Coding	44	GC01M161541	6.05789	https://www.genecards.org/cgi-bin/carddisp.pl?gene=FCGR3A
TNFRSF1B	TNF Receptor Superfamily Member 1B	Protein Coding	46	GC01P012167	5.96407	https://www.genecards.org/cgi-bin/carddisp.pl?gene=TNFRSF1B
TAMM41	TAM41 Mitochondrial Translocator Assembly And Maintenance Homolog	Protein Coding	33	GC03M011721	5.80087	https://www.genecards.org/cgi-bin/carddisp.pl?gene=TAMM41
TLR3	Toll Like Receptor 3	Protein Coding	50	GC04P186059	5.73622	https://www.genecards.org/cgi-bin/carddisp.pl?gene=TLR3
CCR5	C-C Motif Chemokine Receptor 5	Protein Coding	45	GC03P046383	5.48104	https://www.genecards.org/cgi-bin/carddisp.pl?gene=CCR5
MUC1	Mucin 1, Cell Surface Associated	Protein Coding	48	GC01M155185	5.46882	https://www.genecards.org/cgi-bin/carddisp.pl?gene=MUC1
CXCL10	C-X-C Motif Chemokine Ligand 10	Protein Coding	43	GC04M076021	5.44137	https://www.genecards.org/cgi-bin/carddisp.pl?gene=CXCL10
PMS2	PMS1 Homolog 2, Mismatch Repair System Component	Protein Coding	48	GC07M005973	5.3268	https://www.genecards.org/cgi-bin/carddisp.pl?gene=PMS2
CHAT	Choline O-Acetyltransferase	Protein Coding	47	GC10P049609	5.3268	https://www.genecards.org/cgi-bin/carddisp.pl?gene=CHAT
INPP5E	Inositol Polyphosphate-5-Phosphatase E	Protein Coding	41	GC09M136428	5.3268	https://www.genecards.org/cgi-bin/carddisp.pl?gene=INPP5E
CXCL8	C-X-C Motif Chemokine Ligand 8	Protein Coding	40	GC04P073740	5.09742	https://www.genecards.org/cgi-bin/carddisp.pl?gene=CXCL8
HLA-B	Major Histocompatibility Complex, Class I, B	Protein Coding	46	GC06M061261	4.93932	https://www.genecards.org/cgi-bin/carddisp.pl?gene=HLA-B
IRF7	Interferon Regulatory Factor 7	Protein Coding	47	GC11M000612	4.93867	https://www.genecards.org/cgi-bin/carddisp.pl?gene=IRF7
CXCR6	C-X-C Motif Chemokine Receptor 6	Protein Coding	39	GC03P046271	4.91469	https://www.genecards.org/cgi-bin/carddisp.pl?gene=CXCR6
FURIN	Furin, Paired Basic Amino Acid Cleaving Enzyme	Protein Coding	45	GC15P090868	4.85404	https://www.genecards.org/cgi-bin/carddisp.pl?gene=FURIN
CD4	CD4 Molecule	Protein Coding	48	GC12P006786	4.83116	https://www.genecards.org/cgi-bin/carddisp.pl?gene=CD4
FCRL5	Fc Receptor Like 5	Protein Coding	38	GC01M157514	4.83116	https://www.genecards.org/cgi-bin/carddisp.pl?gene=FCRL5
IFNAR2	Interferon Alpha And Beta Receptor Subunit 2	Protein Coding	48	GC21P033229	4.79826	https://www.genecards.org/cgi-bin/carddisp.pl?gene=IFNAR2
BSG	Basigin (Ok Blood Group)	Protein Coding	43	GC19P000571	4.79502	https://www.genecards.org/cgi-bin/carddisp.pl?gene=BSG
TNFRSF1A	TNF Receptor Superfamily Member 1A	Protein Coding	48	GC12M006328	4.77659	https://www.genecards.org/cgi-bin/carddisp.pl?gene=TNFRSF1A
TLR2	Toll Like Receptor 2	Protein Coding	50	GC04P153684	4.70405	https://www.genecards.org/cgi-bin/carddisp.pl?gene=TLR2
ALB	Albumin	Protein Coding	49	GC04P073397	4.67001	https://www.genecards.org/cgi-bin/carddisp.pl?gene=ALB
IRF3	Interferon Regulatory Factor 3	Protein Coding	45	GC19M049659	4.53757	https://www.genecards.org/cgi-bin/carddisp.pl?gene=IRF3
ADM	Adrenomedullin	Protein Coding	44	GC11P010304	4.53119	https://www.genecards.org/cgi-bin/carddisp.pl?gene=ADM
VWF	Von Willebrand Factor	Protein Coding	48	GC12M005917	4.48974	https://www.genecards.org/cgi-bin/carddisp.pl?gene=VWF
LY6D	Lymphocyte Antigen 6 Family Member D	Protein Coding	36	GC08M142784	4.46173	https://www.genecards.org/cgi-bin/carddisp.pl?gene=LY6D
C11orf71	Chromosome 11 Open Reading Frame 71	Protein Coding	29	GC11M114391	4.46173	https://www.genecards.org/cgi-bin/carddisp.pl?gene=C11orf71
CCL2	C-C Motif Chemokine Ligand 2	Protein Coding	47	GC17P034255	4.20435	https://www.genecards.org/cgi-bin/carddisp.pl?gene=CCL2
IL17A	Interleukin 17A	Protein Coding	41	GC06P052186	4.10438	https://www.genecards.org/cgi-bin/carddisp.pl?gene=IL17A
ADAMTS13	ADAM Metallopeptidase With Thrombospondin Type 1 Motif 13	Protein Coding	48	GC09P133414	4.07752	https://www.genecards.org/cgi-bin/carddisp.pl?gene=ADAMTS13
IFITM3	Interferon Induced Transmembrane Protein 3	Protein Coding	41	GC11M000319	3.97952	https://www.genecards.org/cgi-bin/carddisp.pl?gene=IFITM3
S100A8	S100 Calcium Binding Protein A8	Protein Coding	42	GC01M153391	3.95926	https://www.genecards.org/cgi-bin/carddisp.pl?gene=S100A8
HSPA5	Heat Shock Protein Family A (Hsp70) Member 5	Protein Coding	46	GC09M125234	3.87724	https://www.genecards.org/cgi-bin/carddisp.pl?gene=HSPA5
SERPINE1	Serpin Family E Member 1	Protein Coding	49	GC07P101127	3.8634	https://www.genecards.org/cgi-bin/carddisp.pl?gene=SERPINE1
NRP2	Neuropilin 2	Protein Coding	45	GC02P205681	3.82368	https://www.genecards.org/cgi-bin/carddisp.pl?gene=NRP2
LOC119086083	CCR9 Promoter Region	Biological Region	1	GC03P045885	3.78346	https://www.genecards.org/cgi-bin/carddisp.pl?gene=LOC119086083
SERPINA1	Serpin Family A Member 1	Protein Coding	48	GC14M094376	3.75967	https://www.genecards.org/cgi-bin/carddisp.pl?gene=SERPINA1
DDX58	DExD/H-Box Helicase 58	Protein Coding	46	GC09M032455	3.72477	https://www.genecards.org/cgi-bin/carddisp.pl?gene=DDX58
PLAUR	Plasminogen Activator, Urokinase Receptor	Protein Coding	44	GC19M043646	3.72309	https://www.genecards.org/cgi-bin/carddisp.pl?gene=PLAUR
CALCA	Calcitonin Related Polypeptide Alpha	Protein Coding	44	GC11M014945	3.71535	https://www.genecards.org/cgi-bin/carddisp.pl?gene=CALCA
IL7	Interleukin 7	Protein Coding	41	GC08M078689	3.67357	https://www.genecards.org/cgi-bin/carddisp.pl?gene=IL7
HIF1A	Hypoxia Inducible Factor 1 Subunit Alpha	Protein Coding	46	GC14P061695	3.66605	https://www.genecards.org/cgi-bin/carddisp.pl?gene=HIF1A
HMOX1	Heme Oxygenase 1	Protein Coding	50	GC22P035380	3.65838	https://www.genecards.org/cgi-bin/carddisp.pl?gene=HMOX1
MAVS	Mitochondrial Antiviral Signaling Protein	Protein Coding	38	GC20P003907	3.63859	https://www.genecards.org/cgi-bin/carddisp.pl?gene=MAVS
CTSL	Cathepsin L	Protein Coding	46	GC09P087725	3.63371	https://www.genecards.org/cgi-bin/carddisp.pl?gene=CTSL
IL18	Interleukin 18	Protein Coding	42	GC11M112143	3.6279	https://www.genecards.org/cgi-bin/carddisp.pl?gene=IL18
TBK1	TANK Binding Kinase 1	Protein Coding	48	GC12P064451	3.60977	https://www.genecards.org/cgi-bin/carddisp.pl?gene=TBK1
FYCO1	FYVE And Coiled-Coil Domain Autophagy Adaptor 1	Protein Coding	40	GC03M045917	3.59084	https://www.genecards.org/cgi-bin/carddisp.pl?gene=FYCO1
IFIH1	Interferon Induced With Helicase C Domain 1	Protein Coding	45	GC02M162267	3.58713	https://www.genecards.org/cgi-bin/carddisp.pl?gene=IFIH1
RAB7A	RAB7A, Member RAS Oncogene Family	Protein Coding	46	GC03P133360	3.5489	https://www.genecards.org/cgi-bin/carddisp.pl?gene=RAB7A
LZTFL1	Leucine Zipper Transcription Factor Like 1	Protein Coding	38	GC03M045823	3.54862	https://www.genecards.org/cgi-bin/carddisp.pl?gene=LZTFL1
SFTPD	Surfactant Protein D	Protein Coding	43	GC10M079937	3.52924	https://www.genecards.org/cgi-bin/carddisp.pl?gene=SFTPD
TGFB1	Transforming Growth Factor Beta 1	Protein Coding	50	GC19M041301	3.49991	https://www.genecards.org/cgi-bin/carddisp.pl?gene=TGFB1
TREM1	Triggering Receptor Expressed On Myeloid Cells 1	Protein Coding	40	GC06M041267	3.49883	https://www.genecards.org/cgi-bin/carddisp.pl?gene=TREM1
STAT1	Signal Transducer And Activator Of Transcription 1	Protein Coding	51	GC02M190908	3.39024	https://www.genecards.org/cgi-bin/carddisp.pl?gene=STAT1
F5	Coagulation Factor V	Protein Coding	46	GC01M169511	3.37092	https://www.genecards.org/cgi-bin/carddisp.pl?gene=F5
S100A9	S100 Calcium Binding Protein A9	Protein Coding	42	GC01P153357	3.36691	https://www.genecards.org/cgi-bin/carddisp.pl?gene=S100A9
LOC117134611	TMPRSS2 -17 Kb Enhancer	Biological Region	1	GC21P041525	3.33121	https://www.genecards.org/cgi-bin/carddisp.pl?gene=LOC117134611
LOC117135104	TMPRSS2 E3 Enhancer	Biological Region	1	GC21P041529	3.33121	https://www.genecards.org/cgi-bin/carddisp.pl?gene=LOC117135104
LOC117135105	TMPRSS2 E4 Enhancer	Biological Region	1	GC21P041535	3.33121	https://www.genecards.org/cgi-bin/carddisp.pl?gene=LOC117135105
LOC117134605	TMPRSS2 Repressive Element NBS1	Biological Region	1	GC21P041510	3.33121	https://www.genecards.org/cgi-bin/carddisp.pl?gene=LOC117134605
LOC117134606	TMPRSS2 Repressive Element NBS2	Biological Region	1	GC21P041511	3.33121	https://www.genecards.org/cgi-bin/carddisp.pl?gene=LOC117134606
LOC117134607	TMPRSS2 Repressive Element NBS4	Biological Region	1	GC21P041518	3.33121	https://www.genecards.org/cgi-bin/carddisp.pl?gene=LOC117134607
EDN1	Endothelin 1	Protein Coding	48	GC06P012256	3.31964	https://www.genecards.org/cgi-bin/carddisp.pl?gene=EDN1
MUC5AC	Mucin 5AC, Oligomeric Mucus/Gel-Forming	Protein Coding	39	GC11P001581	3.31542	https://www.genecards.org/cgi-bin/carddisp.pl?gene=MUC5AC
MBL2	Mannose Binding Lectin 2	Protein Coding	46	GC10M052760	3.30219	https://www.genecards.org/cgi-bin/carddisp.pl?gene=MBL2
HMGB1	High Mobility Group Box 1	Protein Coding	44	GC13M030456	3.28654	https://www.genecards.org/cgi-bin/carddisp.pl?gene=HMGB1
CD209	CD209 Molecule	Protein Coding	42	GC19M007739	3.27859	https://www.genecards.org/cgi-bin/carddisp.pl?gene=CD209
AGT	Angiotensinogen	Protein Coding	48	GC01M230702	3.27571	https://www.genecards.org/cgi-bin/carddisp.pl?gene=AGT
PRF1	Perforin 1	Protein Coding	45	GC10M070597	3.22705	https://www.genecards.org/cgi-bin/carddisp.pl?gene=PRF1
SDC1	Syndecan 1	Protein Coding	42	GC02M020200	3.22021	https://www.genecards.org/cgi-bin/carddisp.pl?gene=SDC1
FAS	Fas Cell Surface Death Receptor	Protein Coding	49	GC10P090723	3.19849	https://www.genecards.org/cgi-bin/carddisp.pl?gene=FAS
IL13	Interleukin 13	Protein Coding	42	GC05P132656	3.17528	https://www.genecards.org/cgi-bin/carddisp.pl?gene=IL13
CCL5	C-C Motif Chemokine Ligand 5	Protein Coding	42	GC17M035871	3.14094	https://www.genecards.org/cgi-bin/carddisp.pl?gene=CCL5
ELANE	Elastase, Neutrophil Expressed	Protein Coding	48	GC19P002165	3.13235	https://www.genecards.org/cgi-bin/carddisp.pl?gene=ELANE
AAK1	AP2 Associated Kinase 1	Protein Coding	41	GC02M069459	3.09943	https://www.genecards.org/cgi-bin/carddisp.pl?gene=AAK1
ANGPT2	Angiopoietin 2	Protein Coding	46	GC08M006499	3.06301	https://www.genecards.org/cgi-bin/carddisp.pl?gene=ANGPT2
PTX3	Pentraxin 3	Protein Coding	42	GC03P157436	3.06301	https://www.genecards.org/cgi-bin/carddisp.pl?gene=PTX3
CD14	CD14 Molecule	Protein Coding	45	GC05M140631	3.04351	https://www.genecards.org/cgi-bin/carddisp.pl?gene=CD14
TLR8	Toll Like Receptor 8	Protein Coding	47	GC0XP012924	3.04274	https://www.genecards.org/cgi-bin/carddisp.pl?gene=TLR8
OAS3	2'-5'-Oligoadenylate Synthetase 3	Protein Coding	40	GC12P112938	3.0055	https://www.genecards.org/cgi-bin/carddisp.pl?gene=OAS3
AVP	Arginine Vasopressin	Protein Coding	45	GC20M003082	2.92013	https://www.genecards.org/cgi-bin/carddisp.pl?gene=AVP
IL10RB	Interleukin 10 Receptor Subunit Beta	Protein Coding	44	GC21P033266	2.91602	https://www.genecards.org/cgi-bin/carddisp.pl?gene=IL10RB
SLC6A19	Solute Carrier Family 6 Member 19	Protein Coding	45	GC05P001201	2.88613	https://www.genecards.org/cgi-bin/carddisp.pl?gene=SLC6A19
XCR1	X-C Motif Chemokine Receptor 1	Protein Coding	37	GC03M046016	2.8758	https://www.genecards.org/cgi-bin/carddisp.pl?gene=XCR1
CCL3	C-C Motif Chemokine Ligand 3	Protein Coding	38	GC17M036088	2.85746	https://www.genecards.org/cgi-bin/carddisp.pl?gene=CCL3
SIGLEC1	Sialic Acid Binding Ig Like Lectin 1	Protein Coding	40	GC20M003686	2.85267	https://www.genecards.org/cgi-bin/carddisp.pl?gene=SIGLEC1
ZC3HAV1	Zinc Finger CCCH-Type Containing, Antiviral 1	Protein Coding	38	GC07M139044	2.84714	https://www.genecards.org/cgi-bin/carddisp.pl?gene=ZC3HAV1
JAK1	Janus Kinase 1	Protein Coding	52	GC01M064833	2.83506	https://www.genecards.org/cgi-bin/carddisp.pl?gene=JAK1
SFTPB	Surfactant Protein B	Protein Coding	44	GC02M085657	2.81848	https://www.genecards.org/cgi-bin/carddisp.pl?gene=SFTPB
VPS39	VPS39 Subunit Of HOPS Complex	Protein Coding	38	GC15M042159	2.78585	https://www.genecards.org/cgi-bin/carddisp.pl?gene=VPS39
AGTR2	Angiotensin II Receptor Type 2	Protein Coding	43	GC0XP116170	2.78262	https://www.genecards.org/cgi-bin/carddisp.pl?gene=AGTR2
SELP	Selectin P	Protein Coding	45	GC01M169558	2.77829	https://www.genecards.org/cgi-bin/carddisp.pl?gene=SELP
LOC118966792	DACE2 Interferon-Inducible Promoter Region	Biological Region	1	GC0XP015580	2.76611	https://www.genecards.org/cgi-bin/carddisp.pl?gene=LOC118966792
MYD88	MYD88 Innate Immune Signal Transduction Adaptor	Protein Coding	49	GC03P038139	2.7604	https://www.genecards.org/cgi-bin/carddisp.pl?gene=MYD88
NFE2L2	NFE2 Like BZIP Transcription Factor 2	Protein Coding	48	GC02M177227	2.73035	https://www.genecards.org/cgi-bin/carddisp.pl?gene=NFE2L2
CCR1	C-C Motif Chemokine Receptor 1	Protein Coding	45	GC03M046218	2.71452	https://www.genecards.org/cgi-bin/carddisp.pl?gene=CCR1
ITM2B	Integral Membrane Protein 2B	Protein Coding	43	GC13P048233	2.70538	https://www.genecards.org/cgi-bin/carddisp.pl?gene=ITM2B
LOC117600004	CTSL Promoter Region	Biological Region	1	GC09P087724	2.69646	https://www.genecards.org/cgi-bin/carddisp.pl?gene=LOC117600004
CLEC4M	C-Type Lectin Domain Family 4 Member M	Protein Coding	40	GC19P007763	2.68954	https://www.genecards.org/cgi-bin/carddisp.pl?gene=CLEC4M
SERPING1	Serpin Family G Member 1	Protein Coding	46	GC11P057597	2.67246	https://www.genecards.org/cgi-bin/carddisp.pl?gene=SERPING1
PDCD1	Programmed Cell Death 1	Protein Coding	46	GC02M241849	2.66415	https://www.genecards.org/cgi-bin/carddisp.pl?gene=PDCD1
IFNL1	Interferon Lambda 1	Protein Coding	34	GC19P039296	2.65849	https://www.genecards.org/cgi-bin/carddisp.pl?gene=IFNL1
CD163	CD163 Molecule	Protein Coding	43	GC12M007646	2.65714	https://www.genecards.org/cgi-bin/carddisp.pl?gene=CD163
SERPINC1	Serpin Family C Member 1	Protein Coding	47	GC01M174490	2.64559	https://www.genecards.org/cgi-bin/carddisp.pl?gene=SERPINC1
APOL1	Apolipoprotein L1	Protein Coding	44	GC22P036253	2.63815	https://www.genecards.org/cgi-bin/carddisp.pl?gene=APOL1
FLT1	Fms Related Receptor Tyrosine Kinase 1	Protein Coding	50	GC13M028300	2.62414	https://www.genecards.org/cgi-bin/carddisp.pl?gene=FLT1
IFNAR1	Interferon Alpha And Beta Receptor Subunit 1	Protein Coding	45	GC21P033324	2.61033	https://www.genecards.org/cgi-bin/carddisp.pl?gene=IFNAR1
ALOX5	Arachidonate 5-Lipoxygenase	Protein Coding	48	GC10P045374	2.60856	https://www.genecards.org/cgi-bin/carddisp.pl?gene=ALOX5
ADIPOQ	Adiponectin, C1Q And Collagen Domain Containing	Protein Coding	45	GC03P186842	2.60856	https://www.genecards.org/cgi-bin/carddisp.pl?gene=ADIPOQ
GPT	Glutamic--Pyruvic Transaminase	Protein Coding	41	GC08P144502	2.59428	https://www.genecards.org/cgi-bin/carddisp.pl?gene=GPT
IL2	Interleukin 2	Protein Coding	44	GC04M122451	2.58199	https://www.genecards.org/cgi-bin/carddisp.pl?gene=IL2
EPO	Erythropoietin	Protein Coding	41	GC07P100720	2.55343	https://www.genecards.org/cgi-bin/carddisp.pl?gene=EPO
PF4	Platelet Factor 4	Protein Coding	40	GC04M073980	2.55343	https://www.genecards.org/cgi-bin/carddisp.pl?gene=PF4
ERVW-1	Endogenous Retrovirus Group W Member 1, Envelope	Protein Coding	34	GC07M092468	2.55343	https://www.genecards.org/cgi-bin/carddisp.pl?gene=ERVW-1
LPA	Lipoprotein(A)	Protein Coding	42	GC06M160531	2.55145	https://www.genecards.org/cgi-bin/carddisp.pl?gene=LPA
MPO	Myeloperoxidase	Protein Coding	50	GC17M058269	2.52238	https://www.genecards.org/cgi-bin/carddisp.pl?gene=MPO
KNG1	Kininogen 1	Protein Coding	46	GC03P186717	2.51263	https://www.genecards.org/cgi-bin/carddisp.pl?gene=KNG1
IL33	Interleukin 33	Protein Coding	38	GC09P006350	2.51263	https://www.genecards.org/cgi-bin/carddisp.pl?gene=IL33
RAB1B	RAB1B, Member RAS Oncogene Family	Protein Coding	41	GC11P069053	2.50901	https://www.genecards.org/cgi-bin/carddisp.pl?gene=RAB1B
ARF5	ADP Ribosylation Factor 5	Protein Coding	39	GC07P127588	2.50901	https://www.genecards.org/cgi-bin/carddisp.pl?gene=ARF5
TLR9	Toll Like Receptor 9	Protein Coding	45	GC03M052222	2.50841	https://www.genecards.org/cgi-bin/carddisp.pl?gene=TLR9
ICOSLG	Inducible T Cell Costimulator Ligand	Protein Coding	39	GC21M044222	2.50841	https://www.genecards.org/cgi-bin/carddisp.pl?gene=ICOSLG
CCL4	C-C Motif Chemokine Ligand 4	Protein Coding	38	GC17P036103	2.48804	https://www.genecards.org/cgi-bin/carddisp.pl?gene=CCL4
STAT3	Signal Transducer And Activator Of Transcription 3	Protein Coding	50	GC17M042313	2.44979	https://www.genecards.org/cgi-bin/carddisp.pl?gene=STAT3
TTR	Transthyretin	Protein Coding	48	GC18P031557	2.44905	https://www.genecards.org/cgi-bin/carddisp.pl?gene=TTR
ERG	ETS Transcription Factor ERG	Protein Coding	45	GC21M038367	2.42354	https://www.genecards.org/cgi-bin/carddisp.pl?gene=ERG
TAS2R1	Taste 2 Receptor Member 1	Protein Coding	37	GC05M009630	2.42354	https://www.genecards.org/cgi-bin/carddisp.pl?gene=TAS2R1
VAMP8	Vesicle Associated Membrane Protein 8	Protein Coding	40	GC02P085561	2.42321	https://www.genecards.org/cgi-bin/carddisp.pl?gene=VAMP8
VDR	Vitamin D Receptor	Protein Coding	50	GC12M047841	2.40928	https://www.genecards.org/cgi-bin/carddisp.pl?gene=VDR
IL1A	Interleukin 1 Alpha	Protein Coding	43	GC02M112773	2.40281	https://www.genecards.org/cgi-bin/carddisp.pl?gene=IL1A
CXCL1	C-X-C Motif Chemokine Ligand 1	Protein Coding	41	GC04P073869	2.40281	https://www.genecards.org/cgi-bin/carddisp.pl?gene=CXCL1
CXCL2	C-X-C Motif Chemokine Ligand 2	Protein Coding	39	GC04M074097	2.40281	https://www.genecards.org/cgi-bin/carddisp.pl?gene=CXCL2
VPS41	VPS41 Subunit Of HOPS Complex	Protein Coding	39	GC07M039001	2.39466	https://www.genecards.org/cgi-bin/carddisp.pl?gene=VPS41
LINC02967	Long Intergenic Non-Protein Coding RNA 2967	RNA Gene	4	GC20P024920	2.39017	https://www.genecards.org/cgi-bin/carddisp.pl?gene=LINC02967
G6PD	Glucose-6-Phosphate Dehydrogenase	Protein Coding	49	GC0XM154531	2.38671	https://www.genecards.org/cgi-bin/carddisp.pl?gene=G6PD
SCGB1A1	Secretoglobin Family 1A Member 1	Protein Coding	40	GC11P062405	2.37967	https://www.genecards.org/cgi-bin/carddisp.pl?gene=SCGB1A1
MTHFR	Methylenetetrahydrofolate Reductase	Protein Coding	48	GC01M011785	2.36175	https://www.genecards.org/cgi-bin/carddisp.pl?gene=MTHFR
IL6R	Interleukin 6 Receptor	Protein Coding	48	GC01P154405	2.36175	https://www.genecards.org/cgi-bin/carddisp.pl?gene=IL6R
ENPEP	Glutamyl Aminopeptidase	Protein Coding	45	GC04P110365	2.35461	https://www.genecards.org/cgi-bin/carddisp.pl?gene=ENPEP
REN	Renin	Protein Coding	48	GC01M204154	2.34255	https://www.genecards.org/cgi-bin/carddisp.pl?gene=REN
CCR6	C-C Motif Chemokine Receptor 6	Protein Coding	44	GC06P167111	2.34255	https://www.genecards.org/cgi-bin/carddisp.pl?gene=CCR6
F11	Coagulation Factor XI	Protein Coding	46	GC04P186265	2.33106	https://www.genecards.org/cgi-bin/carddisp.pl?gene=F11
HAVCR2	Hepatitis A Virus Cellular Receptor 2	Protein Coding	44	GC05M157063	2.32834	https://www.genecards.org/cgi-bin/carddisp.pl?gene=HAVCR2
BECN1	Beclin 1	Protein Coding	44	GC17M042810	2.30588	https://www.genecards.org/cgi-bin/carddisp.pl?gene=BECN1
AGER	Advanced Glycosylation End-Product Specific Receptor	Protein Coding	44	GC06M032180	2.28227	https://www.genecards.org/cgi-bin/carddisp.pl?gene=AGER
TNNT2	Troponin T2, Cardiac Type	Protein Coding	48	GC01M201359	2.27556	https://www.genecards.org/cgi-bin/carddisp.pl?gene=TNNT2
SNAP29	Synaptosome Associated Protein 29	Protein Coding	41	GC22P020859	2.27556	https://www.genecards.org/cgi-bin/carddisp.pl?gene=SNAP29
GSTT1	Glutathione S-Transferase Theta 1	Protein Coding	33	GC22Mi00270	2.27556	https://www.genecards.org/cgi-bin/carddisp.pl?gene=GSTT1
STX17	Syntaxin 17	Protein Coding	33	GC09P099906	2.27556	https://www.genecards.org/cgi-bin/carddisp.pl?gene=STX17
SAA1	Serum Amyloid A1	Protein Coding	41	GC11P018449	2.23073	https://www.genecards.org/cgi-bin/carddisp.pl?gene=SAA1
TAS2R38	Taste 2 Receptor Member 38	Protein Coding	37	GC07M141972	2.20218	https://www.genecards.org/cgi-bin/carddisp.pl?gene=TAS2R38
SIGMAR1	Sigma Non-Opioid Intracellular Receptor 1	Protein Coding	46	GC09M034634	2.19724	https://www.genecards.org/cgi-bin/carddisp.pl?gene=SIGMAR1
AKAP8L	A-Kinase Anchoring Protein 8 Like	Protein Coding	35	GC19M015380	2.19147	https://www.genecards.org/cgi-bin/carddisp.pl?gene=AKAP8L
NEU1	Neuraminidase 1	Protein Coding	44	GC06M031857	2.1868	https://www.genecards.org/cgi-bin/carddisp.pl?gene=NEU1
RAB8A	RAB8A, Member RAS Oncogene Family	Protein Coding	38	GC19P016111	2.16046	https://www.genecards.org/cgi-bin/carddisp.pl?gene=RAB8A
VPS11	VPS11 Core Subunit Of CORVET And HOPS Complexes	Protein Coding	41	GC11P119067	2.1478	https://www.genecards.org/cgi-bin/carddisp.pl?gene=VPS11
ESM1	Endothelial Cell Specific Molecule 1	Protein Coding	40	GC05M054977	2.13678	https://www.genecards.org/cgi-bin/carddisp.pl?gene=ESM1
MMP1	Matrix Metallopeptidase 1	Protein Coding	51	GC11M102810	2.12121	https://www.genecards.org/cgi-bin/carddisp.pl?gene=MMP1
UNC93B1	Unc-93 Homolog B1, TLR Signaling Regulator	Protein Coding	39	GC11M067991	2.0906	https://www.genecards.org/cgi-bin/carddisp.pl?gene=UNC93B1
LDHA	Lactate Dehydrogenase A	Protein Coding	50	GC11P018394	2.07029	https://www.genecards.org/cgi-bin/carddisp.pl?gene=LDHA
GDF15	Growth Differentiation Factor 15	Protein Coding	42	GC19P050952	2.07029	https://www.genecards.org/cgi-bin/carddisp.pl?gene=GDF15
MIR146A	MicroRNA 146a	RNA Gene	23	GC05P160485	2.05156	https://www.genecards.org/cgi-bin/carddisp.pl?gene=MIR146A
AP3B1	Adaptor Related Protein Complex 3 Subunit Beta 1	Protein Coding	44	GC05M078000	2.04971	https://www.genecards.org/cgi-bin/carddisp.pl?gene=AP3B1
DNMT1	DNA Methyltransferase 1	Protein Coding	50	GC19M010133	2.04386	https://www.genecards.org/cgi-bin/carddisp.pl?gene=DNMT1
HLA-DRB1	Major Histocompatibility Complex, Class II, DR Beta 1	Protein Coding	46	GC06M032578	2.03502	https://www.genecards.org/cgi-bin/carddisp.pl?gene=HLA-DRB1
APLP2	Amyloid Beta Precursor Like Protein 2	Protein Coding	42	GC11P130069	2.03494	https://www.genecards.org/cgi-bin/carddisp.pl?gene=APLP2
NME7	NME/NM23 Family Member 7	Protein Coding	41	GC01M169134	2.03494	https://www.genecards.org/cgi-bin/carddisp.pl?gene=NME7
RAB8B	RAB8B, Member RAS Oncogene Family	Protein Coding	40	GC15P114559	2.03494	https://www.genecards.org/cgi-bin/carddisp.pl?gene=RAB8B
CALML3	Calmodulin Like 3	Protein Coding	40	GC10P005556	2.03494	https://www.genecards.org/cgi-bin/carddisp.pl?gene=CALML3
RAB4B	RAB4B, Member RAS Oncogene Family	Protein Coding	38	GC19P051779	2.03494	https://www.genecards.org/cgi-bin/carddisp.pl?gene=RAB4B
NME5	NME/NM23 Family Member 5	Protein Coding	37	GC05M138115	2.03494	https://www.genecards.org/cgi-bin/carddisp.pl?gene=NME5
CMPK2	Cytidine/Uridine Monophosphate Kinase 2	Protein Coding	37	GC02M006834	2.03494	https://www.genecards.org/cgi-bin/carddisp.pl?gene=CMPK2
TTYH1	Tweety Family Member 1	Protein Coding	37	GC19P062530	2.03494	https://www.genecards.org/cgi-bin/carddisp.pl?gene=TTYH1
ZNF366	Zinc Finger Protein 366	Protein Coding	35	GC05M072907	2.03494	https://www.genecards.org/cgi-bin/carddisp.pl?gene=ZNF366
PYDC1	Pyrin Domain Containing 1	Protein Coding	32	GC16M035915	2.03494	https://www.genecards.org/cgi-bin/carddisp.pl?gene=PYDC1
BTBD17	BTB Domain Containing 17	Protein Coding	30	GC17M074356	2.03494	https://www.genecards.org/cgi-bin/carddisp.pl?gene=BTBD17
VKORC1	Vitamin K Epoxide Reductase Complex Subunit 1	Protein Coding	46	GC16M035909	2.02825	https://www.genecards.org/cgi-bin/carddisp.pl?gene=VKORC1
STING1	Stimulator Of Interferon Response CGAMP Interactor 1	Protein Coding	33	GC05M139476	2.02825	https://www.genecards.org/cgi-bin/carddisp.pl?gene=STING1
NCAM1	Neural Cell Adhesion Molecule 1	Protein Coding	46	GC11P112961	2.02603	https://www.genecards.org/cgi-bin/carddisp.pl?gene=NCAM1
CXCL16	C-X-C Motif Chemokine Ligand 16	Protein Coding	39	GC17M004733	2.02603	https://www.genecards.org/cgi-bin/carddisp.pl?gene=CXCL16
LOC111832671	Albumin (ALB) 5' Regulatory Region	Biological Region	2	GC04P073399	2.02603	https://www.genecards.org/cgi-bin/carddisp.pl?gene=LOC111832671
TH2-LCR	Th2 Cytokine Locus Control Region	Biological Region	2	GC05P132629	2.02603	https://www.genecards.org/cgi-bin/carddisp.pl?gene=TH2-LCR
LOC117152611	DPP4 -4.2 Kb Glucocorticoid Response Element	Biological Region	2	GC02P162078	2.02603	https://www.genecards.org/cgi-bin/carddisp.pl?gene=LOC117152611
LOC117152610	DPP4 Promoter Region	Biological Region	2	GC02P162076	2.02603	https://www.genecards.org/cgi-bin/carddisp.pl?gene=LOC117152610
LOC106699567	CD8A Intronic Regulatory Region	Biological Region	2	GC02P086786	2.02603	https://www.genecards.org/cgi-bin/carddisp.pl?gene=LOC106699567
LOC116158494	CRISPRi-Validated Cis-Regulatory Element Chr4.1813	Biological Region	1	GC04P074056	2.02603	https://www.genecards.org/cgi-bin/carddisp.pl?gene=LOC116158494
LOC116158495	CRISPRi-Validated Cis-Regulatory Element Chr4.1814	Biological Region	1	GC04P074057	2.02603	https://www.genecards.org/cgi-bin/carddisp.pl?gene=LOC116158495
LOC117204000	ANPEP Distal Promoter	Biological Region	1	GC15P089814	2.02603	https://www.genecards.org/cgi-bin/carddisp.pl?gene=LOC117204000
LOC117204001	ANPEP Proximal Promoter	Biological Region	1	GC15P089806	2.02603	https://www.genecards.org/cgi-bin/carddisp.pl?gene=LOC117204001
LOC119230225	IFNAR1 Promoter Region	Biological Region	1	GC21P033323	2.02603	https://www.genecards.org/cgi-bin/carddisp.pl?gene=LOC119230225
LOC112590816	Sharpr-MPRA Regulatory Region 6411	Biological Region	1	GC01P064917	2.02603	https://www.genecards.org/cgi-bin/carddisp.pl?gene=LOC112590816
LOC112590817	Sharpr-MPRA Regulatory Region 2453	Biological Region	1	GC01P064934	2.02603	https://www.genecards.org/cgi-bin/carddisp.pl?gene=LOC112590817
LOC119266102	IFNGR2 Promoter Region	Biological Region	1	GC21P033403	2.02603	https://www.genecards.org/cgi-bin/carddisp.pl?gene=LOC119266102
LOC116183086	CRISPRi-Validated Cis-Regulatory Element Chr7.1154	Biological Region	1	GC07P022680	2.02603	https://www.genecards.org/cgi-bin/carddisp.pl?gene=LOC116183086
LOC116183087	CRISPRi-Validated Cis-Regulatory Element Chr7.1155	Biological Region	1	GC07P022681	2.02603	https://www.genecards.org/cgi-bin/carddisp.pl?gene=LOC116183087
LOC117693187	CTSL 3' Regulatory Element	Biological Region	1	GC09P087731	2.02603	https://www.genecards.org/cgi-bin/carddisp.pl?gene=LOC117693187
ICAM1	Intercellular Adhesion Molecule 1	Protein Coding	49	GC19P010310	2.01024	https://www.genecards.org/cgi-bin/carddisp.pl?gene=ICAM1
SURF1	SURF1 Cytochrome C Oxidase Assembly Factor	Protein Coding	42	GC09M133351	2.01024	https://www.genecards.org/cgi-bin/carddisp.pl?gene=SURF1
IFI44	Interferon Induced Protein 44	Protein Coding	37	GC01P078649	2.01024	https://www.genecards.org/cgi-bin/carddisp.pl?gene=IFI44
AHR	Aryl Hydrocarbon Receptor	Protein Coding	48	GC07P016916	1.99014	https://www.genecards.org/cgi-bin/carddisp.pl?gene=AHR
SLC6A15	Solute Carrier Family 6 Member 15	Protein Coding	41	GC12M084859	1.97846	https://www.genecards.org/cgi-bin/carddisp.pl?gene=SLC6A15
NEDD1	NEDD1 Gamma-Tubulin Ring Complex Targeting Factor	Protein Coding	37	GC12P096907	1.97846	https://www.genecards.org/cgi-bin/carddisp.pl?gene=NEDD1
CST3	Cystatin C	Protein Coding	44	GC20M023646	1.96585	https://www.genecards.org/cgi-bin/carddisp.pl?gene=CST3
IRF5	Interferon Regulatory Factor 5	Protein Coding	46	GC07P128937	1.94511	https://www.genecards.org/cgi-bin/carddisp.pl?gene=IRF5
BRD4	Bromodomain Containing 4	Protein Coding	46	GC19M015236	1.90837	https://www.genecards.org/cgi-bin/carddisp.pl?gene=BRD4
AKAP8	A-Kinase Anchoring Protein 8	Protein Coding	41	GC19M015354	1.90837	https://www.genecards.org/cgi-bin/carddisp.pl?gene=AKAP8
RPL36	Ribosomal Protein L36	Protein Coding	39	GC19P005674	1.90837	https://www.genecards.org/cgi-bin/carddisp.pl?gene=RPL36
FBXL12	F-Box And Leucine Rich Repeat Protein 12	Protein Coding	35	GC19M009810	1.90837	https://www.genecards.org/cgi-bin/carddisp.pl?gene=FBXL12
TIMM29	Translocase Of Inner Mitochondrial Membrane 29	Protein Coding	25	GC19P010929	1.90837	https://www.genecards.org/cgi-bin/carddisp.pl?gene=TIMM29
WWP2	WW Domain Containing E3 Ubiquitin Protein Ligase 2	Protein Coding	43	GC16P069796	1.90209	https://www.genecards.org/cgi-bin/carddisp.pl?gene=WWP2
LGALS3	Galectin 3	Protein Coding	44	GC14P055124	1.90136	https://www.genecards.org/cgi-bin/carddisp.pl?gene=LGALS3
OAS2	2'-5'-Oligoadenylate Synthetase 2	Protein Coding	39	GC12P112978	1.88714	https://www.genecards.org/cgi-bin/carddisp.pl?gene=OAS2
TEK	TEK Receptor Tyrosine Kinase	Protein Coding	50	GC09P027109	1.87796	https://www.genecards.org/cgi-bin/carddisp.pl?gene=TEK
KLF2	Kruppel Like Factor 2	Protein Coding	40	GC19P050893	1.87775	https://www.genecards.org/cgi-bin/carddisp.pl?gene=KLF2
SDCBP	Syndecan Binding Protein	Protein Coding	40	GC08P058539	1.87775	https://www.genecards.org/cgi-bin/carddisp.pl?gene=SDCBP
EIF2B1	Eukaryotic Translation Initiation Factor 2B Subunit Alpha	Protein Coding	43	GC12M123620	1.85845	https://www.genecards.org/cgi-bin/carddisp.pl?gene=EIF2B1
AXL	AXL Receptor Tyrosine Kinase	Protein Coding	50	GC19P041219	1.85279	https://www.genecards.org/cgi-bin/carddisp.pl?gene=AXL
SIRT3	Sirtuin 3	Protein Coding	46	GC11M000215	1.85279	https://www.genecards.org/cgi-bin/carddisp.pl?gene=SIRT3
STX7	Syntaxin 7	Protein Coding	39	GC06M132445	1.8367	https://www.genecards.org/cgi-bin/carddisp.pl?gene=STX7
STX6	Syntaxin 6	Protein Coding	38	GC01M180972	1.8367	https://www.genecards.org/cgi-bin/carddisp.pl?gene=STX6
VPS16	VPS16 Core Subunit Of CORVET And HOPS Complexes	Protein Coding	36	GC20P002840	1.8367	https://www.genecards.org/cgi-bin/carddisp.pl?gene=VPS16
VPS18	VPS18 Core Subunit Of CORVET And HOPS Complexes	Protein Coding	35	GC15P040894	1.8367	https://www.genecards.org/cgi-bin/carddisp.pl?gene=VPS18
HSD17B4	Hydroxysteroid 17-Beta Dehydrogenase 4	Protein Coding	45	GC05P119452	1.83504	https://www.genecards.org/cgi-bin/carddisp.pl?gene=HSD17B4
TPM4	Tropomyosin 4	Protein Coding	40	GC19P050886	1.83504	https://www.genecards.org/cgi-bin/carddisp.pl?gene=TPM4
DOCK6	Dedicator Of Cytokinesis 6	Protein Coding	40	GC19M011199	1.83504	https://www.genecards.org/cgi-bin/carddisp.pl?gene=DOCK6
KDELR1	KDEL Endoplasmic Reticulum Protein Retention Receptor 1	Protein Coding	39	GC19M048382	1.83504	https://www.genecards.org/cgi-bin/carddisp.pl?gene=KDELR1
LRRFIP2	LRR Binding FLII Interacting Protein 2	Protein Coding	38	GC03M037052	1.83504	https://www.genecards.org/cgi-bin/carddisp.pl?gene=LRRFIP2
EIF3G	Eukaryotic Translation Initiation Factor 3 Subunit G	Protein Coding	37	GC19M010115	1.83504	https://www.genecards.org/cgi-bin/carddisp.pl?gene=EIF3G
SURF6	Surfeit 6	Protein Coding	34	GC09M133331	1.83504	https://www.genecards.org/cgi-bin/carddisp.pl?gene=SURF6
MON2	MON2 Homolog, Regulator Of Endosome-To-Golgi Trafficking	Protein Coding	33	GC12P062466	1.83504	https://www.genecards.org/cgi-bin/carddisp.pl?gene=MON2
TTC27	Tetratricopeptide Repeat Domain 27	Protein Coding	32	GC02P032628	1.83504	https://www.genecards.org/cgi-bin/carddisp.pl?gene=TTC27
LMNB1	Lamin B1	Protein Coding	46	GC05P126776	1.83187	https://www.genecards.org/cgi-bin/carddisp.pl?gene=LMNB1
CNBP	CCHC-Type Zinc Finger Nucleic Acid Binding Protein	Protein Coding	41	GC03M129167	1.83187	https://www.genecards.org/cgi-bin/carddisp.pl?gene=CNBP
GZMA	Granzyme A	Protein Coding	42	GC05P055102	1.82621	https://www.genecards.org/cgi-bin/carddisp.pl?gene=GZMA
TMPRSS4	Transmembrane Serine Protease 4	Protein Coding	39	GC11P118077	1.82621	https://www.genecards.org/cgi-bin/carddisp.pl?gene=TMPRSS4
ISG15	ISG15 Ubiquitin Like Modifier	Protein Coding	45	GC01P001001	1.81737	https://www.genecards.org/cgi-bin/carddisp.pl?gene=ISG15
HLA-G	Major Histocompatibility Complex, Class I, G	Protein Coding	44	GC06P076812	1.79766	https://www.genecards.org/cgi-bin/carddisp.pl?gene=HLA-G
IFNL4	Interferon Lambda 4 (Gene/Pseudogene)	Protein Coding	19	GC19M039246	1.79766	https://www.genecards.org/cgi-bin/carddisp.pl?gene=IFNL4
PDHX	Pyruvate Dehydrogenase Complex Component X	Protein Coding	46	GC11P034894	1.7888	https://www.genecards.org/cgi-bin/carddisp.pl?gene=PDHX
HMGCR	3-Hydroxy-3-Methylglutaryl-CoA Reductase	Protein Coding	45	GC05P075336	1.7888	https://www.genecards.org/cgi-bin/carddisp.pl?gene=HMGCR
CYB5A	Cytochrome B5 Type A	Protein Coding	43	GC18M074250	1.7888	https://www.genecards.org/cgi-bin/carddisp.pl?gene=CYB5A
FAT1	FAT Atypical Cadherin 1	Protein Coding	40	GC04M186587	1.7888	https://www.genecards.org/cgi-bin/carddisp.pl?gene=FAT1
PEG10	Paternally Expressed 10	Protein Coding	40	GC07P094656	1.7888	https://www.genecards.org/cgi-bin/carddisp.pl?gene=PEG10
PDS5A	PDS5 Cohesin Associated Factor A	Protein Coding	38	GC04M039824	1.7888	https://www.genecards.org/cgi-bin/carddisp.pl?gene=PDS5A
MLEC	Malectin	Protein Coding	36	GC12P120687	1.7888	https://www.genecards.org/cgi-bin/carddisp.pl?gene=MLEC
PALM	Paralemmin	Protein Coding	35	GC19P000708	1.7888	https://www.genecards.org/cgi-bin/carddisp.pl?gene=PALM
PLA2G7	Phospholipase A2 Group VII	Protein Coding	49	GC06M061586	1.78771	https://www.genecards.org/cgi-bin/carddisp.pl?gene=PLA2G7
AKT1	AKT Serine/Threonine Kinase 1	Protein Coding	52	GC14M104769	1.76661	https://www.genecards.org/cgi-bin/carddisp.pl?gene=AKT1
PLG	Plasminogen	Protein Coding	48	GC06P160702	1.76661	https://www.genecards.org/cgi-bin/carddisp.pl?gene=PLG
VEGFA	Vascular Endothelial Growth Factor A	Protein Coding	47	GC06P043770	1.76661	https://www.genecards.org/cgi-bin/carddisp.pl?gene=VEGFA
TRPV1	Transient Receptor Potential Cation Channel Subfamily V Member 1	Protein Coding	46	GC17M003565	1.76661	https://www.genecards.org/cgi-bin/carddisp.pl?gene=TRPV1
TRPA1	Transient Receptor Potential Cation Channel Subfamily A Member 1	Protein Coding	46	GC08M072019	1.76661	https://www.genecards.org/cgi-bin/carddisp.pl?gene=TRPA1
PAFAH1B1	Platelet Activating Factor Acetylhydrolase 1b Regulatory Subunit 1	Protein Coding	45	GC17P002593	1.76661	https://www.genecards.org/cgi-bin/carddisp.pl?gene=PAFAH1B1
GSTM1	Glutathione S-Transferase Mu 1	Protein Coding	41	GC01P109687	1.76661	https://www.genecards.org/cgi-bin/carddisp.pl?gene=GSTM1
C9orf72	C9orf72-SMCR8 Complex Subunit	Protein Coding	41	GC09M028148	1.76661	https://www.genecards.org/cgi-bin/carddisp.pl?gene=C9orf72
WWP1	WW Domain Containing E3 Ubiquitin Protein Ligase 1	Protein Coding	41	GC08P086342	1.76661	https://www.genecards.org/cgi-bin/carddisp.pl?gene=WWP1
RBM15	RNA Binding Motif Protein 15	Protein Coding	38	GC01P110338	1.76661	https://www.genecards.org/cgi-bin/carddisp.pl?gene=RBM15
IFNL2	Interferon Lambda 2	Protein Coding	35	GC19P039268	1.76661	https://www.genecards.org/cgi-bin/carddisp.pl?gene=IFNL2
PLA2G2A	Phospholipase A2 Group IIA	Protein Coding	46	GC01M019975	1.76526	https://www.genecards.org/cgi-bin/carddisp.pl?gene=PLA2G2A
CHRFAM7A	CHRNA7 (Exons 5-10) And FAM7A (Exons A-E) Fusion	Protein Coding	33	GC15M030360	1.74165	https://www.genecards.org/cgi-bin/carddisp.pl?gene=CHRFAM7A
MIR139	MicroRNA 139	RNA Gene	21	GC11M072615	1.74165	https://www.genecards.org/cgi-bin/carddisp.pl?gene=MIR139
MIR30A	MicroRNA 30a	RNA Gene	21	GC06M071403	1.74165	https://www.genecards.org/cgi-bin/carddisp.pl?gene=MIR30A
SNHG16	Small Nucleolar RNA Host Gene 16	RNA Gene	20	GC17P076982	1.74165	https://www.genecards.org/cgi-bin/carddisp.pl?gene=SNHG16
SNHG6	Small Nucleolar RNA Host Gene 6	RNA Gene	18	GC08M066921	1.74165	https://www.genecards.org/cgi-bin/carddisp.pl?gene=SNHG6
MAS1	MAS1 Proto-Oncogene, G Protein-Coupled Receptor	Protein Coding	38	GC06P160324	1.73226	https://www.genecards.org/cgi-bin/carddisp.pl?gene=MAS1
PTBP1	Polypyrimidine Tract Binding Protein 1	Protein Coding	42	GC19P000797	1.72854	https://www.genecards.org/cgi-bin/carddisp.pl?gene=PTBP1
ILF3	Interleukin Enhancer Binding Factor 3	Protein Coding	39	GC19P010655	1.72854	https://www.genecards.org/cgi-bin/carddisp.pl?gene=ILF3
TICAM1	Toll Like Receptor Adaptor Molecule 1	Protein Coding	43	GC19M004815	1.71845	https://www.genecards.org/cgi-bin/carddisp.pl?gene=TICAM1
SMN1	Survival Of Motor Neuron 1, Telomeric	Protein Coding	41	GC05P070924	1.71669	https://www.genecards.org/cgi-bin/carddisp.pl?gene=SMN1
S100A12	S100 Calcium Binding Protein A12	Protein Coding	39	GC01M153373	1.71669	https://www.genecards.org/cgi-bin/carddisp.pl?gene=S100A12
MADCAM1	Mucosal Vascular Addressin Cell Adhesion Molecule 1	Protein Coding	40	GC19P002079	1.69894	https://www.genecards.org/cgi-bin/carddisp.pl?gene=MADCAM1
ITGAV	Integrin Subunit Alpha V	Protein Coding	46	GC02P186589	1.69328	https://www.genecards.org/cgi-bin/carddisp.pl?gene=ITGAV
C5	Complement C5	Protein Coding	46	GC09M120952	1.69328	https://www.genecards.org/cgi-bin/carddisp.pl?gene=C5
GC	GC Vitamin D Binding Protein	Protein Coding	45	GC04M071741	1.69328	https://www.genecards.org/cgi-bin/carddisp.pl?gene=GC
C5AR1	Complement C5a Receptor 1	Protein Coding	44	GC19P047290	1.69328	https://www.genecards.org/cgi-bin/carddisp.pl?gene=C5AR1
RB1CC1	RB1 Inducible Coiled-Coil 1	Protein Coding	41	GC08M052622	1.69328	https://www.genecards.org/cgi-bin/carddisp.pl?gene=RB1CC1
VPS33A	VPS33A Core Subunit Of CORVET And HOPS Complexes	Protein Coding	40	GC12M122229	1.69328	https://www.genecards.org/cgi-bin/carddisp.pl?gene=VPS33A
FCGR1A	Fc Gamma Receptor Ia	Protein Coding	41	GC01P149788	1.69121	https://www.genecards.org/cgi-bin/carddisp.pl?gene=FCGR1A
FTL	Ferritin Light Chain	Protein Coding	46	GC19P048965	1.69011	https://www.genecards.org/cgi-bin/carddisp.pl?gene=FTL
MAF	MAF BZIP Transcription Factor	Protein Coding	45	GC16M079204	1.69011	https://www.genecards.org/cgi-bin/carddisp.pl?gene=MAF
MAFB	MAF BZIP Transcription Factor B	Protein Coding	44	GC20M040685	1.69011	https://www.genecards.org/cgi-bin/carddisp.pl?gene=MAFB
UNC13D	Unc-13 Homolog D	Protein Coding	44	GC17M075827	1.69011	https://www.genecards.org/cgi-bin/carddisp.pl?gene=UNC13D
TREM2	Triggering Receptor Expressed On Myeloid Cells 2	Protein Coding	43	GC06M061491	1.69011	https://www.genecards.org/cgi-bin/carddisp.pl?gene=TREM2
FABP2	Fatty Acid Binding Protein 2	Protein Coding	41	GC04M119317	1.69011	https://www.genecards.org/cgi-bin/carddisp.pl?gene=FABP2
THBS3	Thrombospondin 3	Protein Coding	41	GC01M155195	1.69011	https://www.genecards.org/cgi-bin/carddisp.pl?gene=THBS3
LAG3	Lymphocyte Activating 3	Protein Coding	38	GC12P018557	1.69011	https://www.genecards.org/cgi-bin/carddisp.pl?gene=LAG3
MIR126	MicroRNA 126	RNA Gene	23	GC09P136670	1.69011	https://www.genecards.org/cgi-bin/carddisp.pl?gene=MIR126
MIR29A	MicroRNA 29a	RNA Gene	22	GC07M130876	1.69011	https://www.genecards.org/cgi-bin/carddisp.pl?gene=MIR29A
MIR10B	MicroRNA 10b	RNA Gene	22	GC02P176150	1.69011	https://www.genecards.org/cgi-bin/carddisp.pl?gene=MIR10B
MIR31	MicroRNA 31	RNA Gene	21	GC09M021705	1.69011	https://www.genecards.org/cgi-bin/carddisp.pl?gene=MIR31
CD274	CD274 Molecule	Protein Coding	43	GC09P005450	1.68189	https://www.genecards.org/cgi-bin/carddisp.pl?gene=CD274
NOS3	Nitric Oxide Synthase 3	Protein Coding	50	GC07P150990	1.66155	https://www.genecards.org/cgi-bin/carddisp.pl?gene=NOS3
IL2RB	Interleukin 2 Receptor Subunit Beta	Protein Coding	48	GC22M037125	1.66155	https://www.genecards.org/cgi-bin/carddisp.pl?gene=IL2RB
CNR2	Cannabinoid Receptor 2	Protein Coding	45	GC01M023870	1.66155	https://www.genecards.org/cgi-bin/carddisp.pl?gene=CNR2
ENPP2	Ectonucleotide Pyrophosphatase/Phosphodiesterase 2	Protein Coding	44	GC08M119556	1.66155	https://www.genecards.org/cgi-bin/carddisp.pl?gene=ENPP2
P2RY14	Purinergic Receptor P2Y14	Protein Coding	42	GC03M151212	1.66155	https://www.genecards.org/cgi-bin/carddisp.pl?gene=P2RY14
SREBF2	Sterol Regulatory Element Binding Transcription Factor 2	Protein Coding	42	GC22P041833	1.66155	https://www.genecards.org/cgi-bin/carddisp.pl?gene=SREBF2
IL37	Interleukin 37	Protein Coding	37	GC02P120918	1.66155	https://www.genecards.org/cgi-bin/carddisp.pl?gene=IL37
RIOX2	Ribosomal Oxygenase 2	Protein Coding	30	GC03M097942	1.66155	https://www.genecards.org/cgi-bin/carddisp.pl?gene=RIOX2
MDM2	MDM2 Proto-Oncogene	Protein Coding	52	GC12P068808	1.6527	https://www.genecards.org/cgi-bin/carddisp.pl?gene=MDM2
GPHN	Gephyrin	Protein Coding	47	GC14P066507	1.6527	https://www.genecards.org/cgi-bin/carddisp.pl?gene=GPHN
MYO1E	Myosin IE	Protein Coding	44	GC15M059132	1.6527	https://www.genecards.org/cgi-bin/carddisp.pl?gene=MYO1E
TCF3	Transcription Factor 3	Protein Coding	44	GC19M001609	1.6527	https://www.genecards.org/cgi-bin/carddisp.pl?gene=TCF3
ACAD9	Acyl-CoA Dehydrogenase Family Member 9	Protein Coding	43	GC03P133367	1.6527	https://www.genecards.org/cgi-bin/carddisp.pl?gene=ACAD9
CCHCR1	Coiled-Coil Alpha-Helical Rod Protein 1	Protein Coding	38	GC06M061251	1.6527	https://www.genecards.org/cgi-bin/carddisp.pl?gene=CCHCR1
DHX37	DEAH-Box Helicase 37	Protein Coding	38	GC12M124946	1.6527	https://www.genecards.org/cgi-bin/carddisp.pl?gene=DHX37
COPG1	COPI Coat Complex Subunit Gamma 1	Protein Coding	37	GC03P129249	1.6527	https://www.genecards.org/cgi-bin/carddisp.pl?gene=COPG1
QTRT1	Queuine TRNA-Ribosyltransferase Catalytic Subunit 1	Protein Coding	37	GC19P010701	1.6527	https://www.genecards.org/cgi-bin/carddisp.pl?gene=QTRT1
SLC35F1	Solute Carrier Family 35 Member F1	Protein Coding	34	GC06P117907	1.6527	https://www.genecards.org/cgi-bin/carddisp.pl?gene=SLC35F1
PSME3	Proteasome Activator Subunit 3	Protein Coding	41	GC17P042824	1.64704	https://www.genecards.org/cgi-bin/carddisp.pl?gene=PSME3
FNDC5	Fibronectin Type III Domain Containing 5	Protein Coding	34	GC01M033105	1.64704	https://www.genecards.org/cgi-bin/carddisp.pl?gene=FNDC5
PALS1	Protein Associated With LIN7 1, MAGUK P55 Family Member	Protein Coding	32	GC14P067240	1.64704	https://www.genecards.org/cgi-bin/carddisp.pl?gene=PALS1
MMP3	Matrix Metallopeptidase 3	Protein Coding	49	GC11M102835	1.6305	https://www.genecards.org/cgi-bin/carddisp.pl?gene=MMP3
LCN2	Lipocalin 2	Protein Coding	43	GC09P128149	1.6305	https://www.genecards.org/cgi-bin/carddisp.pl?gene=LCN2
ELAVL2	ELAV Like RNA Binding Protein 2	Protein Coding	41	GC09M023690	1.6305	https://www.genecards.org/cgi-bin/carddisp.pl?gene=ELAVL2
PTGDR2	Prostaglandin D2 Receptor 2	Protein Coding	41	GC11M060850	1.6305	https://www.genecards.org/cgi-bin/carddisp.pl?gene=PTGDR2
TNFSF14	TNF Superfamily Member 14	Protein Coding	41	GC19M006663	1.6305	https://www.genecards.org/cgi-bin/carddisp.pl?gene=TNFSF14
DEFA1	Defensin Alpha 1	Protein Coding	41	GC08M006977	1.6305	https://www.genecards.org/cgi-bin/carddisp.pl?gene=DEFA1
UBE2L6	Ubiquitin Conjugating Enzyme E2 L6	Protein Coding	38	GC11M084396	1.6305	https://www.genecards.org/cgi-bin/carddisp.pl?gene=UBE2L6
KLRC2	Killer Cell Lectin Like Receptor C2	Protein Coding	36	GC12M019792	1.6305	https://www.genecards.org/cgi-bin/carddisp.pl?gene=KLRC2
MIR152	MicroRNA 152	RNA Gene	22	GC17M048037	1.61653	https://www.genecards.org/cgi-bin/carddisp.pl?gene=MIR152
ITK	IL2 Inducible T Cell Kinase	Protein Coding	51	GC05P157158	1.59616	https://www.genecards.org/cgi-bin/carddisp.pl?gene=ITK
BTK	Bruton Tyrosine Kinase	Protein Coding	51	GC0XM101349	1.59616	https://www.genecards.org/cgi-bin/carddisp.pl?gene=BTK
CAT	Catalase	Protein Coding	49	GC11P034460	1.59616	https://www.genecards.org/cgi-bin/carddisp.pl?gene=CAT
BCL2	BCL2 Apoptosis Regulator	Protein Coding	49	GC18M063123	1.59616	https://www.genecards.org/cgi-bin/carddisp.pl?gene=BCL2
F10	Coagulation Factor X	Protein Coding	49	GC13P113122	1.59616	https://www.genecards.org/cgi-bin/carddisp.pl?gene=F10
SLC6A4	Solute Carrier Family 6 Member 4	Protein Coding	48	GC17M030194	1.59616	https://www.genecards.org/cgi-bin/carddisp.pl?gene=SLC6A4
PIK3C3	Phosphatidylinositol 3-Kinase Catalytic Subunit Type 3	Protein Coding	48	GC18P041955	1.59616	https://www.genecards.org/cgi-bin/carddisp.pl?gene=PIK3C3
MIF	Macrophage Migration Inhibitory Factor	Protein Coding	47	GC22P023894	1.59616	https://www.genecards.org/cgi-bin/carddisp.pl?gene=MIF
LEP	Leptin	Protein Coding	46	GC07P128241	1.59616	https://www.genecards.org/cgi-bin/carddisp.pl?gene=LEP
NEDD4	NEDD4 E3 Ubiquitin Protein Ligase	Protein Coding	46	GC15M055826	1.59616	https://www.genecards.org/cgi-bin/carddisp.pl?gene=NEDD4
SMURF1	SMAD Specific E3 Ubiquitin Protein Ligase 1	Protein Coding	44	GC07M099027	1.59616	https://www.genecards.org/cgi-bin/carddisp.pl?gene=SMURF1
ULK1	Unc-51 Like Autophagy Activating Kinase 1	Protein Coding	44	GC12P131894	1.59616	https://www.genecards.org/cgi-bin/carddisp.pl?gene=ULK1
OLR1	Oxidized Low Density Lipoprotein Receptor 1	Protein Coding	42	GC12M019787	1.59616	https://www.genecards.org/cgi-bin/carddisp.pl?gene=OLR1
PER3	Period Circadian Regulator 3	Protein Coding	42	GC01P007785	1.59616	https://www.genecards.org/cgi-bin/carddisp.pl?gene=PER3
SELL	Selectin L	Protein Coding	42	GC01M169690	1.59616	https://www.genecards.org/cgi-bin/carddisp.pl?gene=SELL
TIRAP	TIR Domain Containing Adaptor Protein	Protein Coding	42	GC11P126284	1.59616	https://www.genecards.org/cgi-bin/carddisp.pl?gene=TIRAP
SMURF2	SMAD Specific E3 Ubiquitin Protein Ligase 2	Protein Coding	42	GC17M064542	1.59616	https://www.genecards.org/cgi-bin/carddisp.pl?gene=SMURF2
ATG13	Autophagy Related 13	Protein Coding	37	GC11P046644	1.59616	https://www.genecards.org/cgi-bin/carddisp.pl?gene=ATG13
FBXW7-AS1	FBXW7 Antisense RNA 1	RNA Gene	12	GC04P152338	1.59616	https://www.genecards.org/cgi-bin/carddisp.pl?gene=FBXW7-AS1
PLAU	Plasminogen Activator, Urokinase	Protein Coding	50	GC10P073909	1.59243	https://www.genecards.org/cgi-bin/carddisp.pl?gene=PLAU
PIK3R1	Phosphoinositide-3-Kinase Regulatory Subunit 1	Protein Coding	49	GC05P068215	1.59243	https://www.genecards.org/cgi-bin/carddisp.pl?gene=PIK3R1
EPHA7	EPH Receptor A7	Protein Coding	48	GC06M093240	1.59243	https://www.genecards.org/cgi-bin/carddisp.pl?gene=EPHA7
ACACA	Acetyl-CoA Carboxylase Alpha	Protein Coding	48	GC17M037084	1.59243	https://www.genecards.org/cgi-bin/carddisp.pl?gene=ACACA
NRG1	Neuregulin 1	Protein Coding	46	GC08P031639	1.59243	https://www.genecards.org/cgi-bin/carddisp.pl?gene=NRG1
SLC19A1	Solute Carrier Family 19 Member 1	Protein Coding	46	GC21M045493	1.59243	https://www.genecards.org/cgi-bin/carddisp.pl?gene=SLC19A1
VCL	Vinculin	Protein Coding	46	GC10P073995	1.59243	https://www.genecards.org/cgi-bin/carddisp.pl?gene=VCL
PTPRS	Protein Tyrosine Phosphatase Receptor Type S	Protein Coding	45	GC19M005157	1.59243	https://www.genecards.org/cgi-bin/carddisp.pl?gene=PTPRS
OSMR	Oncostatin M Receptor	Protein Coding	45	GC05P038845	1.59243	https://www.genecards.org/cgi-bin/carddisp.pl?gene=OSMR
ATP6V0A2	ATPase H+ Transporting V0 Subunit A2	Protein Coding	44	GC12P123712	1.59243	https://www.genecards.org/cgi-bin/carddisp.pl?gene=ATP6V0A2
LIAS	Lipoic Acid Synthetase	Protein Coding	43	GC04P039487	1.59243	https://www.genecards.org/cgi-bin/carddisp.pl?gene=LIAS
SGCE	Sarcoglycan Epsilon	Protein Coding	43	GC07M094524	1.59243	https://www.genecards.org/cgi-bin/carddisp.pl?gene=SGCE
LMNB2	Lamin B2	Protein Coding	43	GC19M004462	1.59243	https://www.genecards.org/cgi-bin/carddisp.pl?gene=LMNB2
RPL13A	Ribosomal Protein L13a	Protein Coding	42	GC19P049487	1.59243	https://www.genecards.org/cgi-bin/carddisp.pl?gene=RPL13A
CDC37	Cell Division Cycle 37, HSP90 Cochaperone	Protein Coding	41	GC19M010391	1.59243	https://www.genecards.org/cgi-bin/carddisp.pl?gene=CDC37
ATP6V1D	ATPase H+ Transporting V1 Subunit D	Protein Coding	40	GC14M067294	1.59243	https://www.genecards.org/cgi-bin/carddisp.pl?gene=ATP6V1D
POLD3	DNA Polymerase Delta 3, Accessory Subunit	Protein Coding	40	GC11P074526	1.59243	https://www.genecards.org/cgi-bin/carddisp.pl?gene=POLD3
NUCB1	Nucleobindin 1	Protein Coding	40	GC19P048900	1.59243	https://www.genecards.org/cgi-bin/carddisp.pl?gene=NUCB1
PSMD11	Proteasome 26S Subunit, Non-ATPase 11	Protein Coding	40	GC17P032444	1.59243	https://www.genecards.org/cgi-bin/carddisp.pl?gene=PSMD11
SIN3B	SIN3 Transcription Regulator Family Member B	Protein Coding	40	GC19P016829	1.59243	https://www.genecards.org/cgi-bin/carddisp.pl?gene=SIN3B
RNF213	Ring Finger Protein 213	Protein Coding	39	GC17P080260	1.59243	https://www.genecards.org/cgi-bin/carddisp.pl?gene=RNF213
TRA2A	Transformer 2 Alpha Homolog	Protein Coding	39	GC07M023504	1.59243	https://www.genecards.org/cgi-bin/carddisp.pl?gene=TRA2A
ANKLE2	Ankyrin Repeat And LEM Domain Containing 2	Protein Coding	39	GC12M132725	1.59243	https://www.genecards.org/cgi-bin/carddisp.pl?gene=ANKLE2
GCNT3	Glucosaminyl (N-Acetyl) Transferase 3, Mucin Type	Protein Coding	38	GC15P059594	1.59243	https://www.genecards.org/cgi-bin/carddisp.pl?gene=GCNT3
SNRNP70	Small Nuclear Ribonucleoprotein U1 Subunit 70	Protein Coding	38	GC19P049085	1.59243	https://www.genecards.org/cgi-bin/carddisp.pl?gene=SNRNP70
SAFB	Scaffold Attachment Factor B	Protein Coding	38	GC19P005623	1.59243	https://www.genecards.org/cgi-bin/carddisp.pl?gene=SAFB
SACM1L	SAC1 Like Phosphatidylinositide Phosphatase	Protein Coding	38	GC03P046263	1.59243	https://www.genecards.org/cgi-bin/carddisp.pl?gene=SACM1L
TRAPPC9	Trafficking Protein Particle Complex Subunit 9	Protein Coding	38	GC08M139728	1.59243	https://www.genecards.org/cgi-bin/carddisp.pl?gene=TRAPPC9
SYT4	Synaptotagmin 4	Protein Coding	38	GC18M043267	1.59243	https://www.genecards.org/cgi-bin/carddisp.pl?gene=SYT4
DAZAP1	DAZ Associated Protein 1	Protein Coding	38	GC19P001407	1.59243	https://www.genecards.org/cgi-bin/carddisp.pl?gene=DAZAP1
NCAPH2	Non-SMC Condensin II Complex Subunit H2	Protein Coding	37	GC22P050508	1.59243	https://www.genecards.org/cgi-bin/carddisp.pl?gene=NCAPH2
PLXNB2	Plexin B2	Protein Coding	37	GC22M050274	1.59243	https://www.genecards.org/cgi-bin/carddisp.pl?gene=PLXNB2
RMND1	Required For Meiotic Nuclear Division 1 Homolog	Protein Coding	37	GC06M151404	1.59243	https://www.genecards.org/cgi-bin/carddisp.pl?gene=RMND1
SAFB2	Scaffold Attachment Factor B2	Protein Coding	37	GC19M005587	1.59243	https://www.genecards.org/cgi-bin/carddisp.pl?gene=SAFB2
STX18	Syntaxin 18	Protein Coding	36	GC04M004417	1.59243	https://www.genecards.org/cgi-bin/carddisp.pl?gene=STX18
TUT1	Terminal Uridylyl Transferase 1, U6 SnRNA-Specific	Protein Coding	36	GC11M084544	1.59243	https://www.genecards.org/cgi-bin/carddisp.pl?gene=TUT1
TBC1D5	TBC1 Domain Family Member 5	Protein Coding	36	GC03M017157	1.59243	https://www.genecards.org/cgi-bin/carddisp.pl?gene=TBC1D5
PCBP3	Poly(RC) Binding Protein 3	Protein Coding	36	GC21P045643	1.59243	https://www.genecards.org/cgi-bin/carddisp.pl?gene=PCBP3
PIH1D1	PIH1 Domain Containing 1	Protein Coding	36	GC19M062195	1.59243	https://www.genecards.org/cgi-bin/carddisp.pl?gene=PIH1D1
TBC1D8	TBC1 Domain Family Member 8	Protein Coding	35	GC02M101007	1.59243	https://www.genecards.org/cgi-bin/carddisp.pl?gene=TBC1D8
NTPCR	Nucleoside-Triphosphatase, Cancer-Related	Protein Coding	35	GC01P232950	1.59243	https://www.genecards.org/cgi-bin/carddisp.pl?gene=NTPCR
ECHDC3	Enoyl-CoA Hydratase Domain Containing 3	Protein Coding	34	GC10P011742	1.59243	https://www.genecards.org/cgi-bin/carddisp.pl?gene=ECHDC3
RAVER1	Ribonucleoprotein, PTB Binding 1	Protein Coding	34	GC19M010316	1.59243	https://www.genecards.org/cgi-bin/carddisp.pl?gene=RAVER1
WDR18	WD Repeat Domain 18	Protein Coding	34	GC19P002186	1.59243	https://www.genecards.org/cgi-bin/carddisp.pl?gene=WDR18
KRI1	KRI1 Homolog	Protein Coding	33	GC19M010553	1.59243	https://www.genecards.org/cgi-bin/carddisp.pl?gene=KRI1
MYDGF	Myeloid Derived Growth Factor	Protein Coding	33	GC19M004641	1.59243	https://www.genecards.org/cgi-bin/carddisp.pl?gene=MYDGF
PPAN	Peter Pan Homolog	Protein Coding	33	GC19P010296	1.59243	https://www.genecards.org/cgi-bin/carddisp.pl?gene=PPAN
GRWD1	Glutamate Rich WD Repeat Containing 1	Protein Coding	32	GC19P048445	1.59243	https://www.genecards.org/cgi-bin/carddisp.pl?gene=GRWD1
STEAP1B	STEAP Family Member 1B	Protein Coding	26	GC07M022419	1.59243	https://www.genecards.org/cgi-bin/carddisp.pl?gene=STEAP1B
ANXA2	Annexin A2	Protein Coding	47	GC15M060347	1.58677	https://www.genecards.org/cgi-bin/carddisp.pl?gene=ANXA2
SOCS1	Suppressor Of Cytokine Signaling 1	Protein Coding	43	GC16M011783	1.58677	https://www.genecards.org/cgi-bin/carddisp.pl?gene=SOCS1
NPR3	Natriuretic Peptide Receptor 3	Protein Coding	46	GC05P032689	1.5816	https://www.genecards.org/cgi-bin/carddisp.pl?gene=NPR3
PAPPA	Pappalysin 1	Protein Coding	42	GC09P118342	1.5816	https://www.genecards.org/cgi-bin/carddisp.pl?gene=PAPPA
XK	X-Linked Kx Blood Group	Protein Coding	40	GC0XP037685	1.5816	https://www.genecards.org/cgi-bin/carddisp.pl?gene=XK
DELEC1	Deleted In Esophageal Cancer 1	RNA Gene	23	GC09P118334	1.5816	https://www.genecards.org/cgi-bin/carddisp.pl?gene=DELEC1
ANXA5	Annexin A5	Protein Coding	45	GC04M121667	1.56232	https://www.genecards.org/cgi-bin/carddisp.pl?gene=ANXA5
SMPD1	Sphingomyelin Phosphodiesterase 1	Protein Coding	48	GC11P006390	1.55718	https://www.genecards.org/cgi-bin/carddisp.pl?gene=SMPD1
SPP1	Secreted Phosphoprotein 1	Protein Coding	46	GC04P087975	1.55718	https://www.genecards.org/cgi-bin/carddisp.pl?gene=SPP1
P2RX7	Purinergic Receptor P2X 7	Protein Coding	46	GC12P125508	1.55718	https://www.genecards.org/cgi-bin/carddisp.pl?gene=P2RX7
F2RL1	F2R Like Trypsin Receptor 1	Protein Coding	45	GC05P076818	1.55718	https://www.genecards.org/cgi-bin/carddisp.pl?gene=F2RL1
F2RL3	F2R Like Thrombin Or Trypsin Receptor 3	Protein Coding	45	GC19P016888	1.55718	https://www.genecards.org/cgi-bin/carddisp.pl?gene=F2RL3
CHI3L1	Chitinase 3 Like 1	Protein Coding	44	GC01M203148	1.55718	https://www.genecards.org/cgi-bin/carddisp.pl?gene=CHI3L1
THPO	Thrombopoietin	Protein Coding	42	GC03M184371	1.55718	https://www.genecards.org/cgi-bin/carddisp.pl?gene=THPO
BDKRB1	Bradykinin Receptor B1	Protein Coding	42	GC14P096290	1.55718	https://www.genecards.org/cgi-bin/carddisp.pl?gene=BDKRB1
CPA3	Carboxypeptidase A3	Protein Coding	41	GC03P148865	1.55718	https://www.genecards.org/cgi-bin/carddisp.pl?gene=CPA3
LGALS9	Galectin 9	Protein Coding	39	GC17P027629	1.55718	https://www.genecards.org/cgi-bin/carddisp.pl?gene=LGALS9
NEAT1	Nuclear Paraspeckle Assembly Transcript 1	RNA Gene	24	GC11P068984	1.55718	https://www.genecards.org/cgi-bin/carddisp.pl?gene=NEAT1
MALAT1	Metastasis Associated Lung Adenocarcinoma Transcript 1	RNA Gene	24	GC11P068989	1.55718	https://www.genecards.org/cgi-bin/carddisp.pl?gene=MALAT1
CTLA4	Cytotoxic T-Lymphocyte Associated Protein 4	Protein Coding	44	GC02P203867	1.54578	https://www.genecards.org/cgi-bin/carddisp.pl?gene=CTLA4
FPR1	Formyl Peptide Receptor 1	Protein Coding	47	GC19M051745	1.51093	https://www.genecards.org/cgi-bin/carddisp.pl?gene=FPR1
SIRT1	Sirtuin 1	Protein Coding	47	GC10P067884	1.51093	https://www.genecards.org/cgi-bin/carddisp.pl?gene=SIRT1
ATF4	Activating Transcription Factor 4	Protein Coding	45	GC22P039599	1.51093	https://www.genecards.org/cgi-bin/carddisp.pl?gene=ATF4
IDO1	Indoleamine 2,3-Dioxygenase 1	Protein Coding	44	GC08P039891	1.51093	https://www.genecards.org/cgi-bin/carddisp.pl?gene=IDO1
TNFRSF13C	TNF Receptor Superfamily Member 13C	Protein Coding	43	GC22M055099	1.51093	https://www.genecards.org/cgi-bin/carddisp.pl?gene=TNFRSF13C
SOD3	Superoxide Dismutase 3	Protein Coding	42	GC04P024798	1.51093	https://www.genecards.org/cgi-bin/carddisp.pl?gene=SOD3
CXCL3	C-X-C Motif Chemokine Ligand 3	Protein Coding	37	GC04M074036	1.51093	https://www.genecards.org/cgi-bin/carddisp.pl?gene=CXCL3
ATG14	Autophagy Related 14	Protein Coding	35	GC14M055366	1.51093	https://www.genecards.org/cgi-bin/carddisp.pl?gene=ATG14
OR51E2	Olfactory Receptor Family 51 Subfamily E Member 2	Protein Coding	32	GC11M004680	1.51093	https://www.genecards.org/cgi-bin/carddisp.pl?gene=OR51E2
MIR1207	MicroRNA 1207	RNA Gene	17	GC08P128049	1.51093	https://www.genecards.org/cgi-bin/carddisp.pl?gene=MIR1207
ANPEP	Alanyl Aminopeptidase, Membrane	Protein Coding	49	GC15M089784	1.50205	https://www.genecards.org/cgi-bin/carddisp.pl?gene=ANPEP
CXCL5	C-X-C Motif Chemokine Ligand 5	Protein Coding	40	GC04M073995	1.50205	https://www.genecards.org/cgi-bin/carddisp.pl?gene=CXCL5
MCUB	Mitochondrial Calcium Uniporter Dominant Negative Subunit Beta	Protein Coding	25	GC04P109561	1.47474	https://www.genecards.org/cgi-bin/carddisp.pl?gene=MCUB
ITGB3	Integrin Subunit Beta 3	Protein Coding	49	GC17P051053	1.461	https://www.genecards.org/cgi-bin/carddisp.pl?gene=ITGB3
SOCS3	Suppressor Of Cytokine Signaling 3	Protein Coding	42	GC17M078356	1.45067	https://www.genecards.org/cgi-bin/carddisp.pl?gene=SOCS3
CCL20	C-C Motif Chemokine Ligand 20	Protein Coding	42	GC02P227835	1.45067	https://www.genecards.org/cgi-bin/carddisp.pl?gene=CCL20
PSMD1	Proteasome 26S Subunit, Non-ATPase 1	Protein Coding	38	GC02P231056	1.45067	https://www.genecards.org/cgi-bin/carddisp.pl?gene=PSMD1
SLCO4C1	Solute Carrier Organic Anion Transporter Family Member 4C1	Protein Coding	37	GC05M102233	1.45067	https://www.genecards.org/cgi-bin/carddisp.pl?gene=SLCO4C1
UBC	Ubiquitin C	Protein Coding	41	GC12M124911	1.44695	https://www.genecards.org/cgi-bin/carddisp.pl?gene=UBC
RELA	RELA Proto-Oncogene, NF-KB Subunit	Protein Coding	50	GC11M065653	1.44128	https://www.genecards.org/cgi-bin/carddisp.pl?gene=RELA
KLRC1	Killer Cell Lectin Like Receptor C1	Protein Coding	41	GC12M019793	1.44128	https://www.genecards.org/cgi-bin/carddisp.pl?gene=KLRC1
ITGAM	Integrin Subunit Alpha M	Protein Coding	46	GC16P039480	1.42621	https://www.genecards.org/cgi-bin/carddisp.pl?gene=ITGAM
IL7R	Interleukin 7 Receptor	Protein Coding	45	GC05P035852	1.42621	https://www.genecards.org/cgi-bin/carddisp.pl?gene=IL7R
NLRP12	NLR Family Pyrin Domain Containing 12	Protein Coding	43	GC19M053793	1.42621	https://www.genecards.org/cgi-bin/carddisp.pl?gene=NLRP12
IRF9	Interferon Regulatory Factor 9	Protein Coding	43	GC14P024161	1.42621	https://www.genecards.org/cgi-bin/carddisp.pl?gene=IRF9
IGHMBP2	Immunoglobulin Mu DNA Binding Protein 2	Protein Coding	42	GC11P068903	1.42621	https://www.genecards.org/cgi-bin/carddisp.pl?gene=IGHMBP2
TK2	Thymidine Kinase 2	Protein Coding	41	GC16M066508	1.42621	https://www.genecards.org/cgi-bin/carddisp.pl?gene=TK2
TRIP4	Thyroid Hormone Receptor Interactor 4	Protein Coding	40	GC15P092226	1.42621	https://www.genecards.org/cgi-bin/carddisp.pl?gene=TRIP4
TOMM70	Translocase Of Outer Mitochondrial Membrane 70	Protein Coding	30	GC03M100364	1.42222	https://www.genecards.org/cgi-bin/carddisp.pl?gene=TOMM70
G3BP1	G3BP Stress Granule Assembly Factor 1	Protein Coding	39	GC05P151771	1.36834	https://www.genecards.org/cgi-bin/carddisp.pl?gene=G3BP1
G3BP2	G3BP Stress Granule Assembly Factor 2	Protein Coding	36	GC04M075642	1.36834	https://www.genecards.org/cgi-bin/carddisp.pl?gene=G3BP2
CXCR4	C-X-C Motif Chemokine Receptor 4	Protein Coding	50	GC02M136114	1.36595	https://www.genecards.org/cgi-bin/carddisp.pl?gene=CXCR4
CPT2	Carnitine Palmitoyltransferase 2	Protein Coding	49	GC01P053196	1.36595	https://www.genecards.org/cgi-bin/carddisp.pl?gene=CPT2
MAPT	Microtubule Associated Protein Tau	Protein Coding	49	GC17P045894	1.36595	https://www.genecards.org/cgi-bin/carddisp.pl?gene=MAPT
GAA	Alpha Glucosidase	Protein Coding	48	GC17P080101	1.36595	https://www.genecards.org/cgi-bin/carddisp.pl?gene=GAA
B2M	Beta-2-Microglobulin	Protein Coding	48	GC15P044711	1.36595	https://www.genecards.org/cgi-bin/carddisp.pl?gene=B2M
JUN	Jun Proto-Oncogene, AP-1 Transcription Factor Subunit	Protein Coding	47	GC01M058780	1.36595	https://www.genecards.org/cgi-bin/carddisp.pl?gene=JUN
HADHA	Hydroxyacyl-CoA Dehydrogenase Trifunctional Multienzyme Complex Subunit Alpha	Protein Coding	46	GC02M026190	1.36595	https://www.genecards.org/cgi-bin/carddisp.pl?gene=HADHA
FHL1	Four And A Half LIM Domains 1	Protein Coding	45	GC0XP136146	1.36595	https://www.genecards.org/cgi-bin/carddisp.pl?gene=FHL1
CD81	CD81 Molecule	Protein Coding	45	GC11P002505	1.36595	https://www.genecards.org/cgi-bin/carddisp.pl?gene=CD81
ACADVL	Acyl-CoA Dehydrogenase Very Long Chain	Protein Coding	45	GC17P007219	1.36595	https://www.genecards.org/cgi-bin/carddisp.pl?gene=ACADVL
APEX1	Apurinic/Apyrimidinic Endodeoxyribonuclease 1	Protein Coding	44	GC14P020455	1.36595	https://www.genecards.org/cgi-bin/carddisp.pl?gene=APEX1
EIF2S1	Eukaryotic Translation Initiation Factor 2 Subunit Alpha	Protein Coding	43	GC14P067359	1.36595	https://www.genecards.org/cgi-bin/carddisp.pl?gene=EIF2S1
ITIH4	Inter-Alpha-Trypsin Inhibitor Heavy Chain 4	Protein Coding	42	GC03M052812	1.36595	https://www.genecards.org/cgi-bin/carddisp.pl?gene=ITIH4
DHPS	Deoxyhypusine Synthase	Protein Coding	42	GC19M013460	1.36595	https://www.genecards.org/cgi-bin/carddisp.pl?gene=DHPS
MATR3	Matrin 3	Protein Coding	41	GC05P139274	1.36595	https://www.genecards.org/cgi-bin/carddisp.pl?gene=MATR3
FKRP	Fukutin Related Protein	Protein Coding	40	GC19P046746	1.36595	https://www.genecards.org/cgi-bin/carddisp.pl?gene=FKRP
LACTB	Lactamase Beta	Protein Coding	36	GC15P112676	1.36595	https://www.genecards.org/cgi-bin/carddisp.pl?gene=LACTB
TRMT10C	TRNA Methyltransferase 10C, Mitochondrial RNase P Subunit	Protein Coding	34	GC03P101561	1.36595	https://www.genecards.org/cgi-bin/carddisp.pl?gene=TRMT10C
MESD	Mesoderm Development LRP Chaperone	Protein Coding	34	GC15M080964	1.36595	https://www.genecards.org/cgi-bin/carddisp.pl?gene=MESD
UGT2A1	UDP Glucuronosyltransferase Family 2 Member A1 Complex Locus	Protein Coding	34	GC04M069588	1.34363	https://www.genecards.org/cgi-bin/carddisp.pl?gene=UGT2A1
UGT2A2	UDP Glucuronosyltransferase Family 2 Member A2	Protein Coding	30	GC04M069589	1.34363	https://www.genecards.org/cgi-bin/carddisp.pl?gene=UGT2A2
ANO6	Anoctamin 6	Protein Coding	41	GC12P045215	1.32943	https://www.genecards.org/cgi-bin/carddisp.pl?gene=ANO6
LDLRAD3	Low Density Lipoprotein Receptor Class A Domain Containing 3	Protein Coding	32	GC11P035943	1.32411	https://www.genecards.org/cgi-bin/carddisp.pl?gene=LDLRAD3
FASN	Fatty Acid Synthase	Protein Coding	48	GC17M082078	1.30518	https://www.genecards.org/cgi-bin/carddisp.pl?gene=FASN
PNPLA3	Patatin Like Phospholipase Domain Containing 3	Protein Coding	41	GC22P043923	1.30518	https://www.genecards.org/cgi-bin/carddisp.pl?gene=PNPLA3
CCL7	C-C Motif Chemokine Ligand 7	Protein Coding	41	GC17P034270	1.30518	https://www.genecards.org/cgi-bin/carddisp.pl?gene=CCL7
TNNI1	Troponin I1, Slow Skeletal Type	Protein Coding	39	GC01M201404	1.30518	https://www.genecards.org/cgi-bin/carddisp.pl?gene=TNNI1
PARP14	Poly(ADP-Ribose) Polymerase Family Member 14	Protein Coding	38	GC03P122680	1.30518	https://www.genecards.org/cgi-bin/carddisp.pl?gene=PARP14
ERVFRD-1	Endogenous Retrovirus Group FRD Member 1, Envelope	Protein Coding	32	GC06M011103	1.30518	https://www.genecards.org/cgi-bin/carddisp.pl?gene=ERVFRD-1
MIR320A	MicroRNA 320a	RNA Gene	21	GC08M022262	1.30518	https://www.genecards.org/cgi-bin/carddisp.pl?gene=MIR320A
MIR451A	MicroRNA 451a	RNA Gene	19	GC17M028861	1.30518	https://www.genecards.org/cgi-bin/carddisp.pl?gene=MIR451A
MIR320C1	MicroRNA 320c-1	RNA Gene	16	GC18P021683	1.30518	https://www.genecards.org/cgi-bin/carddisp.pl?gene=MIR320C1
MIR320B1	MicroRNA 320b-1	RNA Gene	15	GC01P116671	1.30518	https://www.genecards.org/cgi-bin/carddisp.pl?gene=MIR320B1
SCARB1	Scavenger Receptor Class B Member 1	Protein Coding	46	GC12M124776	1.28739	https://www.genecards.org/cgi-bin/carddisp.pl?gene=SCARB1
CFTR	CF Transmembrane Conductance Regulator	Protein Coding	50	GC07P117287	1.26131	https://www.genecards.org/cgi-bin/carddisp.pl?gene=CFTR
CD40LG	CD40 Ligand	Protein Coding	47	GC0XP136649	1.26131	https://www.genecards.org/cgi-bin/carddisp.pl?gene=CD40LG
PIK3C2A	Phosphatidylinositol-4-Phosphate 3-Kinase Catalytic Subunit Type 2 Alpha	Protein Coding	46	GC11M017506	1.26131	https://www.genecards.org/cgi-bin/carddisp.pl?gene=PIK3C2A
IL5	Interleukin 5	Protein Coding	44	GC05M132541	1.26131	https://www.genecards.org/cgi-bin/carddisp.pl?gene=IL5
SFTPC	Surfactant Protein C	Protein Coding	42	GC08P022156	1.26131	https://www.genecards.org/cgi-bin/carddisp.pl?gene=SFTPC
CCL11	C-C Motif Chemokine Ligand 11	Protein Coding	42	GC17P034285	1.26131	https://www.genecards.org/cgi-bin/carddisp.pl?gene=CCL11
H2AC18	H2A Clustered Histone 18	Protein Coding	26	GC01M151368	1.26131	https://www.genecards.org/cgi-bin/carddisp.pl?gene=H2AC18
RAP1GDS1	Rap1 GTPase-GDP Dissociation Stimulator 1	Protein Coding	41	GC04P098261	1.2593	https://www.genecards.org/cgi-bin/carddisp.pl?gene=RAP1GDS1
DCTN1	Dynactin Subunit 1	Protein Coding	45	GC02M074361	1.24825	https://www.genecards.org/cgi-bin/carddisp.pl?gene=DCTN1
NUP98	Nucleoporin 98 And 96 Precursor	Protein Coding	43	GC11M003671	1.24133	https://www.genecards.org/cgi-bin/carddisp.pl?gene=NUP98
KAT2B	Lysine Acetyltransferase 2B	Protein Coding	46	GC03P020043	1.22046	https://www.genecards.org/cgi-bin/carddisp.pl?gene=KAT2B
MMP12	Matrix Metallopeptidase 12	Protein Coding	45	GC11M102862	1.22046	https://www.genecards.org/cgi-bin/carddisp.pl?gene=MMP12
GIGYF2	GRB10 Interacting GYF Protein 2	Protein Coding	40	GC02P232698	1.18173	https://www.genecards.org/cgi-bin/carddisp.pl?gene=GIGYF2
REEP5	Receptor Accessory Protein 5	Protein Coding	40	GC05M112876	1.18173	https://www.genecards.org/cgi-bin/carddisp.pl?gene=REEP5
RAE1	Ribonucleic Acid Export 1	Protein Coding	40	GC20P057351	1.18173	https://www.genecards.org/cgi-bin/carddisp.pl?gene=RAE1
RAB14	RAB14, Member RAS Oncogene Family	Protein Coding	39	GC09M121178	1.18173	https://www.genecards.org/cgi-bin/carddisp.pl?gene=RAB14
UGGT2	UDP-Glucose Glycoprotein Glucosyltransferase 2	Protein Coding	38	GC13M095801	1.18173	https://www.genecards.org/cgi-bin/carddisp.pl?gene=UGGT2
CLCC1	Chloride Channel CLIC Like 1	Protein Coding	38	GC01M108881	1.18173	https://www.genecards.org/cgi-bin/carddisp.pl?gene=CLCC1
ALG5	ALG5 Dolichyl-Phosphate Beta-Glucosyltransferase	Protein Coding	38	GC13M036949	1.18173	https://www.genecards.org/cgi-bin/carddisp.pl?gene=ALG5
GOLGB1	Golgin B1	Protein Coding	36	GC03M121663	1.18173	https://www.genecards.org/cgi-bin/carddisp.pl?gene=GOLGB1
ATP6AP1	ATPase H+ Transporting Accessory Protein 1	Protein Coding	42	GC0XP154428	1.14624	https://www.genecards.org/cgi-bin/carddisp.pl?gene=ATP6AP1
IL17RA	Interleukin 17 Receptor A	Protein Coding	44	GC22P018163	1.1326	https://www.genecards.org/cgi-bin/carddisp.pl?gene=IL17RA
AP2M1	Adaptor Related Protein Complex 2 Subunit Mu 1	Protein Coding	44	GC03P184174	1.11966	https://www.genecards.org/cgi-bin/carddisp.pl?gene=AP2M1
RAF1	Raf-1 Proto-Oncogene, Serine/Threonine Kinase	Protein Coding	52	GC03M012583	1.11836	https://www.genecards.org/cgi-bin/carddisp.pl?gene=RAF1
TYK2	Tyrosine Kinase 2	Protein Coding	51	GC19M010350	1.11836	https://www.genecards.org/cgi-bin/carddisp.pl?gene=TYK2
GRIN2B	Glutamate Ionotropic Receptor NMDA Type Subunit 2B	Protein Coding	50	GC12M013437	1.11836	https://www.genecards.org/cgi-bin/carddisp.pl?gene=GRIN2B
NTRK3	Neurotrophic Receptor Tyrosine Kinase 3	Protein Coding	50	GC15M087859	1.11836	https://www.genecards.org/cgi-bin/carddisp.pl?gene=NTRK3
DBH	Dopamine Beta-Hydroxylase	Protein Coding	50	GC09P133636	1.11836	https://www.genecards.org/cgi-bin/carddisp.pl?gene=DBH
PTCH1	Patched 1	Protein Coding	49	GC09M095442	1.11836	https://www.genecards.org/cgi-bin/carddisp.pl?gene=PTCH1
SYT1	Synaptotagmin 1	Protein Coding	48	GC12P078863	1.11836	https://www.genecards.org/cgi-bin/carddisp.pl?gene=SYT1
SMARCA4	SWI/SNF Related, Matrix Associated, Actin Dependent Regulator Of Chromatin, Subfamily A, Member 4	Protein Coding	48	GC19P010932	1.11836	https://www.genecards.org/cgi-bin/carddisp.pl?gene=SMARCA4
GRIA1	Glutamate Ionotropic Receptor AMPA Type Subunit 1	Protein Coding	48	GC05P153467	1.11836	https://www.genecards.org/cgi-bin/carddisp.pl?gene=GRIA1
KCNQ2	Potassium Voltage-Gated Channel Subfamily Q Member 2	Protein Coding	48	GC20M063400	1.11836	https://www.genecards.org/cgi-bin/carddisp.pl?gene=KCNQ2
CPS1	Carbamoyl-Phosphate Synthase 1	Protein Coding	47	GC02P210477	1.11836	https://www.genecards.org/cgi-bin/carddisp.pl?gene=CPS1
BAX	BCL2 Associated X, Apoptosis Regulator	Protein Coding	47	GC19P048954	1.11836	https://www.genecards.org/cgi-bin/carddisp.pl?gene=BAX
LIFR	LIF Receptor Subunit Alpha	Protein Coding	46	GC05M038475	1.11836	https://www.genecards.org/cgi-bin/carddisp.pl?gene=LIFR
GRM8	Glutamate Metabotropic Receptor 8	Protein Coding	46	GC07M126438	1.11836	https://www.genecards.org/cgi-bin/carddisp.pl?gene=GRM8
GRM7	Glutamate Metabotropic Receptor 7	Protein Coding	46	GC03P006770	1.11836	https://www.genecards.org/cgi-bin/carddisp.pl?gene=GRM7
IRS1	Insulin Receptor Substrate 1	Protein Coding	46	GC02M226731	1.11836	https://www.genecards.org/cgi-bin/carddisp.pl?gene=IRS1
MAPK12	Mitogen-Activated Protein Kinase 12	Protein Coding	46	GC22M055226	1.11836	https://www.genecards.org/cgi-bin/carddisp.pl?gene=MAPK12
TCF7L2	Transcription Factor 7 Like 2	Protein Coding	46	GC10P112950	1.11836	https://www.genecards.org/cgi-bin/carddisp.pl?gene=TCF7L2
AVPR1A	Arginine Vasopressin Receptor 1A	Protein Coding	46	GC12M063142	1.11836	https://www.genecards.org/cgi-bin/carddisp.pl?gene=AVPR1A
CARD11	Caspase Recruitment Domain Family Member 11	Protein Coding	46	GC07M002906	1.11836	https://www.genecards.org/cgi-bin/carddisp.pl?gene=CARD11
BMP2	Bone Morphogenetic Protein 2	Protein Coding	46	GC20P006767	1.11836	https://www.genecards.org/cgi-bin/carddisp.pl?gene=BMP2
GPX4	Glutathione Peroxidase 4	Protein Coding	46	GC19P001103	1.11836	https://www.genecards.org/cgi-bin/carddisp.pl?gene=GPX4
MELK	Maternal Embryonic Leucine Zipper Kinase	Protein Coding	46	GC09P036572	1.11836	https://www.genecards.org/cgi-bin/carddisp.pl?gene=MELK
RFC1	Replication Factor C Subunit 1	Protein Coding	46	GC04M039291	1.11836	https://www.genecards.org/cgi-bin/carddisp.pl?gene=RFC1
XDH	Xanthine Dehydrogenase	Protein Coding	46	GC02M031334	1.11836	https://www.genecards.org/cgi-bin/carddisp.pl?gene=XDH
GP9	Glycoprotein IX Platelet	Protein Coding	45	GC03P133378	1.11836	https://www.genecards.org/cgi-bin/carddisp.pl?gene=GP9
HRH4	Histamine Receptor H4	Protein Coding	45	GC18P024460	1.11836	https://www.genecards.org/cgi-bin/carddisp.pl?gene=HRH4
UGDH	UDP-Glucose 6-Dehydrogenase	Protein Coding	45	GC04M039502	1.11836	https://www.genecards.org/cgi-bin/carddisp.pl?gene=UGDH
SALL1	Spalt Like Transcription Factor 1	Protein Coding	45	GC16M051135	1.11836	https://www.genecards.org/cgi-bin/carddisp.pl?gene=SALL1
SOX5	SRY-Box Transcription Factor 5	Protein Coding	45	GC12M023529	1.11836	https://www.genecards.org/cgi-bin/carddisp.pl?gene=SOX5
TMPO	Thymopoietin	Protein Coding	45	GC12P098515	1.11836	https://www.genecards.org/cgi-bin/carddisp.pl?gene=TMPO
CCR3	C-C Motif Chemokine Receptor 3	Protein Coding	45	GC03P046276	1.11836	https://www.genecards.org/cgi-bin/carddisp.pl?gene=CCR3
PSMA6	Proteasome 20S Subunit Alpha 6	Protein Coding	45	GC14P035278	1.11836	https://www.genecards.org/cgi-bin/carddisp.pl?gene=PSMA6
KDM4B	Lysine Demethylase 4B	Protein Coding	45	GC19P004969	1.11836	https://www.genecards.org/cgi-bin/carddisp.pl?gene=KDM4B
KISS1R	KISS1 Receptor	Protein Coding	44	GC19P002167	1.11836	https://www.genecards.org/cgi-bin/carddisp.pl?gene=KISS1R
NFASC	Neurofascin	Protein Coding	44	GC01P204828	1.11836	https://www.genecards.org/cgi-bin/carddisp.pl?gene=NFASC
NCOR2	Nuclear Receptor Corepressor 2	Protein Coding	44	GC12M124324	1.11836	https://www.genecards.org/cgi-bin/carddisp.pl?gene=NCOR2
EYA1	EYA Transcriptional Coactivator And Phosphatase 1	Protein Coding	44	GC08M071210	1.11836	https://www.genecards.org/cgi-bin/carddisp.pl?gene=EYA1
PAK6	P21 (RAC1) Activated Kinase 6	Protein Coding	44	GC15P040217	1.11836	https://www.genecards.org/cgi-bin/carddisp.pl?gene=PAK6
S1PR2	Sphingosine-1-Phosphate Receptor 2	Protein Coding	44	GC19M010223	1.11836	https://www.genecards.org/cgi-bin/carddisp.pl?gene=S1PR2
SI	Sucrase-Isomaltase	Protein Coding	44	GC03M164978	1.11836	https://www.genecards.org/cgi-bin/carddisp.pl?gene=SI
TBL1XR1	TBL1X Receptor 1	Protein Coding	44	GC03M177019	1.11836	https://www.genecards.org/cgi-bin/carddisp.pl?gene=TBL1XR1
CHST3	Carbohydrate Sulfotransferase 3	Protein Coding	44	GC10P071964	1.11836	https://www.genecards.org/cgi-bin/carddisp.pl?gene=CHST3
CCR2	C-C Motif Chemokine Receptor 2	Protein Coding	44	GC03P046356	1.11836	https://www.genecards.org/cgi-bin/carddisp.pl?gene=CCR2
CHKB	Choline Kinase Beta	Protein Coding	44	GC22M050578	1.11836	https://www.genecards.org/cgi-bin/carddisp.pl?gene=CHKB
ACSL1	Acyl-CoA Synthetase Long Chain Family Member 1	Protein Coding	44	GC04M184755	1.11836	https://www.genecards.org/cgi-bin/carddisp.pl?gene=ACSL1
MAGI2	Membrane Associated Guanylate Kinase, WW And PDZ Domain Containing 2	Protein Coding	44	GC07M078017	1.11836	https://www.genecards.org/cgi-bin/carddisp.pl?gene=MAGI2
MBP	Myelin Basic Protein	Protein Coding	44	GC18M076978	1.11836	https://www.genecards.org/cgi-bin/carddisp.pl?gene=MBP
RPL18	Ribosomal Protein L18	Protein Coding	44	GC19M048615	1.11836	https://www.genecards.org/cgi-bin/carddisp.pl?gene=RPL18
ROBO1	Roundabout Guidance Receptor 1	Protein Coding	44	GC03M078597	1.11836	https://www.genecards.org/cgi-bin/carddisp.pl?gene=ROBO1
PLCE1	Phospholipase C Epsilon 1	Protein Coding	44	GC10P093993	1.11836	https://www.genecards.org/cgi-bin/carddisp.pl?gene=PLCE1
LAMP2	Lysosomal Associated Membrane Protein 2	Protein Coding	43	GC0XM120426	1.11836	https://www.genecards.org/cgi-bin/carddisp.pl?gene=LAMP2
GFPT2	Glutamine-Fructose-6-Phosphate Transaminase 2	Protein Coding	43	GC05M180300	1.11836	https://www.genecards.org/cgi-bin/carddisp.pl?gene=GFPT2
KAT6B	Lysine Acetyltransferase 6B	Protein Coding	43	GC10P074860	1.11836	https://www.genecards.org/cgi-bin/carddisp.pl?gene=KAT6B
IRF2	Interferon Regulatory Factor 2	Protein Coding	43	GC04M184387	1.11836	https://www.genecards.org/cgi-bin/carddisp.pl?gene=IRF2
SMOC2	SPARC Related Modular Calcium Binding 2	Protein Coding	43	GC06P168441	1.11836	https://www.genecards.org/cgi-bin/carddisp.pl?gene=SMOC2
CNDP1	Carnosine Dipeptidase 1	Protein Coding	43	GC18P074534	1.11836	https://www.genecards.org/cgi-bin/carddisp.pl?gene=CNDP1
MAP2	Microtubule Associated Protein 2	Protein Coding	43	GC02P209424	1.11836	https://www.genecards.org/cgi-bin/carddisp.pl?gene=MAP2
PROK2	Prokineticin 2	Protein Coding	43	GC03M071771	1.11836	https://www.genecards.org/cgi-bin/carddisp.pl?gene=PROK2
NBEAL2	Neurobeachin Like 2	Protein Coding	42	GC03P046979	1.11836	https://www.genecards.org/cgi-bin/carddisp.pl?gene=NBEAL2
HDAC10	Histone Deacetylase 10	Protein Coding	42	GC22M050245	1.11836	https://www.genecards.org/cgi-bin/carddisp.pl?gene=HDAC10
ITGA9	Integrin Subunit Alpha 9	Protein Coding	42	GC03P037468	1.11836	https://www.genecards.org/cgi-bin/carddisp.pl?gene=ITGA9
IL1RAPL1	Interleukin 1 Receptor Accessory Protein Like 1	Protein Coding	42	GC0XP028605	1.11836	https://www.genecards.org/cgi-bin/carddisp.pl?gene=IL1RAPL1
MTNR1A	Melatonin Receptor 1A	Protein Coding	42	GC04M186533	1.11836	https://www.genecards.org/cgi-bin/carddisp.pl?gene=MTNR1A
ADAMTSL1	ADAMTS Like 1	Protein Coding	42	GC09P017906	1.11836	https://www.genecards.org/cgi-bin/carddisp.pl?gene=ADAMTSL1
BRDT	Bromodomain Testis Associated	Protein Coding	42	GC01P091949	1.11836	https://www.genecards.org/cgi-bin/carddisp.pl?gene=BRDT
POLK	DNA Polymerase Kappa	Protein Coding	42	GC05P075511	1.11836	https://www.genecards.org/cgi-bin/carddisp.pl?gene=POLK
RPL7A	Ribosomal Protein L7a	Protein Coding	42	GC09P133348	1.11836	https://www.genecards.org/cgi-bin/carddisp.pl?gene=RPL7A
SH3GL2	SH3 Domain Containing GRB2 Like 2, Endophilin A1	Protein Coding	42	GC09P017569	1.11836	https://www.genecards.org/cgi-bin/carddisp.pl?gene=SH3GL2
SHANK2	SH3 And Multiple Ankyrin Repeat Domains 2	Protein Coding	42	GC11M070467	1.11836	https://www.genecards.org/cgi-bin/carddisp.pl?gene=SHANK2
SH3GL1	SH3 Domain Containing GRB2 Like 1, Endophilin A2	Protein Coding	42	GC19M004360	1.11836	https://www.genecards.org/cgi-bin/carddisp.pl?gene=SH3GL1
TMPRSS15	Transmembrane Serine Protease 15	Protein Coding	42	GC21M018269	1.11836	https://www.genecards.org/cgi-bin/carddisp.pl?gene=TMPRSS15
SKP1	S-Phase Kinase Associated Protein 1	Protein Coding	42	GC05M134148	1.11836	https://www.genecards.org/cgi-bin/carddisp.pl?gene=SKP1
SLC30A10	Solute Carrier Family 30 Member 10	Protein Coding	42	GC01M219685	1.11836	https://www.genecards.org/cgi-bin/carddisp.pl?gene=SLC30A10
SRD5A2	Steroid 5 Alpha-Reductase 2	Protein Coding	42	GC02M031522	1.11836	https://www.genecards.org/cgi-bin/carddisp.pl?gene=SRD5A2
CDH4	Cadherin 4	Protein Coding	42	GC20P061252	1.11836	https://www.genecards.org/cgi-bin/carddisp.pl?gene=CDH4
DPP9	Dipeptidyl Peptidase 9	Protein Coding	42	GC19M004675	1.11836	https://www.genecards.org/cgi-bin/carddisp.pl?gene=DPP9
DAGLA	Diacylglycerol Lipase Alpha	Protein Coding	42	GC11P061680	1.11836	https://www.genecards.org/cgi-bin/carddisp.pl?gene=DAGLA
DAB1	DAB Adaptor Protein 1	Protein Coding	42	GC01M056994	1.11836	https://www.genecards.org/cgi-bin/carddisp.pl?gene=DAB1
ICAM3	Intercellular Adhesion Molecule 3	Protein Coding	42	GC19M010388	1.11836	https://www.genecards.org/cgi-bin/carddisp.pl?gene=ICAM3
MLC1	Modulator Of VRAC Current 1	Protein Coding	42	GC22M050059	1.11836	https://www.genecards.org/cgi-bin/carddisp.pl?gene=MLC1
NUP107	Nucleoporin 107	Protein Coding	42	GC12P068686	1.11836	https://www.genecards.org/cgi-bin/carddisp.pl?gene=NUP107
KLF15	Kruppel Like Factor 15	Protein Coding	41	GC03M126293	1.11836	https://www.genecards.org/cgi-bin/carddisp.pl?gene=KLF15
HIP1	Huntingtin Interacting Protein 1	Protein Coding	41	GC07M075533	1.11836	https://www.genecards.org/cgi-bin/carddisp.pl?gene=HIP1
HPSE2	Heparanase 2 (Inactive)	Protein Coding	41	GC10M098457	1.11836	https://www.genecards.org/cgi-bin/carddisp.pl?gene=HPSE2
HOMER1	Homer Scaffold Protein 1	Protein Coding	41	GC05M079372	1.11836	https://www.genecards.org/cgi-bin/carddisp.pl?gene=HOMER1
GPM6A	Glycoprotein M6A	Protein Coding	41	GC04M175632	1.11836	https://www.genecards.org/cgi-bin/carddisp.pl?gene=GPM6A
IQGAP2	IQ Motif Containing GTPase Activating Protein 2	Protein Coding	41	GC05P076403	1.11836	https://www.genecards.org/cgi-bin/carddisp.pl?gene=IQGAP2
GNA12	G Protein Subunit Alpha 12	Protein Coding	41	GC07M002728	1.11836	https://www.genecards.org/cgi-bin/carddisp.pl?gene=GNA12
MYT1L	Myelin Transcription Factor 1 Like	Protein Coding	41	GC02M001789	1.11836	https://www.genecards.org/cgi-bin/carddisp.pl?gene=MYT1L
RPL9	Ribosomal Protein L9	Protein Coding	41	GC04M039452	1.11836	https://www.genecards.org/cgi-bin/carddisp.pl?gene=RPL9
ADD2	Adducin 2	Protein Coding	41	GC02M070626	1.11836	https://www.genecards.org/cgi-bin/carddisp.pl?gene=ADD2
AS3MT	Arsenite Methyltransferase	Protein Coding	41	GC10P102869	1.11836	https://www.genecards.org/cgi-bin/carddisp.pl?gene=AS3MT
ASRGL1	Asparaginase And Isoaspartyl Peptidase 1	Protein Coding	41	GC11P062337	1.11836	https://www.genecards.org/cgi-bin/carddisp.pl?gene=ASRGL1
BHMT	Betaine--Homocysteine S-Methyltransferase	Protein Coding	41	GC05P079111	1.11836	https://www.genecards.org/cgi-bin/carddisp.pl?gene=BHMT
LRP1B	LDL Receptor Related Protein 1B	Protein Coding	41	GC02M140231	1.11836	https://www.genecards.org/cgi-bin/carddisp.pl?gene=LRP1B
MARCO	Macrophage Receptor With Collagenous Structure	Protein Coding	41	GC02P118942	1.11836	https://www.genecards.org/cgi-bin/carddisp.pl?gene=MARCO
MBD4	Methyl-CpG Binding Domain 4, DNA Glycosylase	Protein Coding	41	GC03M129430	1.11836	https://www.genecards.org/cgi-bin/carddisp.pl?gene=MBD4
PTP4A3	Protein Tyrosine Phosphatase 4A3	Protein Coding	41	GC08P141391	1.11836	https://www.genecards.org/cgi-bin/carddisp.pl?gene=PTP4A3
PTPRE	Protein Tyrosine Phosphatase Receptor Type E	Protein Coding	41	GC10P127907	1.11836	https://www.genecards.org/cgi-bin/carddisp.pl?gene=PTPRE
NTM	Neurotrimin	Protein Coding	41	GC11P131370	1.11836	https://www.genecards.org/cgi-bin/carddisp.pl?gene=NTM
KDM4A	Lysine Demethylase 4A	Protein Coding	41	GC01P043650	1.11836	https://www.genecards.org/cgi-bin/carddisp.pl?gene=KDM4A
MYH4	Myosin Heavy Chain 4	Protein Coding	40	GC17M010443	1.11836	https://www.genecards.org/cgi-bin/carddisp.pl?gene=MYH4
FREM2	FRAS1 Related Extracellular Matrix 2	Protein Coding	40	GC13P038687	1.11836	https://www.genecards.org/cgi-bin/carddisp.pl?gene=FREM2
GALNT13	Polypeptide N-Acetylgalactosaminyltransferase 13	Protein Coding	40	GC02P153871	1.11836	https://www.genecards.org/cgi-bin/carddisp.pl?gene=GALNT13
GRIN3B	Glutamate Ionotropic Receptor NMDA Type Subunit 3B	Protein Coding	40	GC19P001000	1.11836	https://www.genecards.org/cgi-bin/carddisp.pl?gene=GRIN3B
CD93	CD93 Molecule	Protein Coding	40	GC20M023079	1.11836	https://www.genecards.org/cgi-bin/carddisp.pl?gene=CD93
MTA2	Metastasis Associated 1 Family Member 2	Protein Coding	40	GC11M084550	1.11836	https://www.genecards.org/cgi-bin/carddisp.pl?gene=MTA2
MUC2	Mucin 2, Oligomeric Mucus/Gel-Forming	Protein Coding	40	GC11P001074	1.11836	https://www.genecards.org/cgi-bin/carddisp.pl?gene=MUC2
RPS15	Ribosomal Protein S15	Protein Coding	40	GC19P001438	1.11836	https://www.genecards.org/cgi-bin/carddisp.pl?gene=RPS15
STK26	Serine/Threonine Kinase 26	Protein Coding	40	GC0XP132023	1.11836	https://www.genecards.org/cgi-bin/carddisp.pl?gene=STK26
TUBGCP6	Tubulin Gamma Complex Associated Protein 6	Protein Coding	40	GC22M050217	1.11836	https://www.genecards.org/cgi-bin/carddisp.pl?gene=TUBGCP6
RYBP	RING1 And YY1 Binding Protein	Protein Coding	40	GC03M072371	1.11836	https://www.genecards.org/cgi-bin/carddisp.pl?gene=RYBP
ANO3	Anoctamin 3	Protein Coding	40	GC11P026188	1.11836	https://www.genecards.org/cgi-bin/carddisp.pl?gene=ANO3
ACYP2	Acylphosphatase 2	Protein Coding	40	GC02P053970	1.11836	https://www.genecards.org/cgi-bin/carddisp.pl?gene=ACYP2
EFNA2	Ephrin A2	Protein Coding	40	GC19P002216	1.11836	https://www.genecards.org/cgi-bin/carddisp.pl?gene=EFNA2
EDAR	Ectodysplasin A Receptor	Protein Coding	40	GC02M108894	1.11836	https://www.genecards.org/cgi-bin/carddisp.pl?gene=EDAR
CYTH2	Cytohesin 2	Protein Coding	40	GC19P052236	1.11836	https://www.genecards.org/cgi-bin/carddisp.pl?gene=CYTH2
BRD1	Bromodomain Containing 1	Protein Coding	40	GC22M049773	1.11836	https://www.genecards.org/cgi-bin/carddisp.pl?gene=BRD1
ICAM5	Intercellular Adhesion Molecule 5	Protein Coding	40	GC19P010289	1.11836	https://www.genecards.org/cgi-bin/carddisp.pl?gene=ICAM5
CYP4F11	Cytochrome P450 Family 4 Subfamily F Member 11	Protein Coding	40	GC19M015912	1.11836	https://www.genecards.org/cgi-bin/carddisp.pl?gene=CYP4F11
MBD2	Methyl-CpG Binding Domain Protein 2	Protein Coding	40	GC18M054151	1.11836	https://www.genecards.org/cgi-bin/carddisp.pl?gene=MBD2
MED25	Mediator Complex Subunit 25	Protein Coding	40	GC19P052352	1.11836	https://www.genecards.org/cgi-bin/carddisp.pl?gene=MED25
RBM10	RNA Binding Motif Protein 10	Protein Coding	40	GC0XP047418	1.11836	https://www.genecards.org/cgi-bin/carddisp.pl?gene=RBM10
RFX3	Regulatory Factor X3	Protein Coding	40	GC09M003214	1.11836	https://www.genecards.org/cgi-bin/carddisp.pl?gene=RFX3
PPP2R5E	Protein Phosphatase 2 Regulatory Subunit B'Epsilon	Protein Coding	40	GC14M063371	1.11836	https://www.genecards.org/cgi-bin/carddisp.pl?gene=PPP2R5E
DPYSL3	Dihydropyrimidinase Like 3	Protein Coding	40	GC05M147390	1.11836	https://www.genecards.org/cgi-bin/carddisp.pl?gene=DPYSL3
SCUBE2	Signal Peptide, CUB Domain And EGF Like Domain Containing 2	Protein Coding	40	GC11M009019	1.11836	https://www.genecards.org/cgi-bin/carddisp.pl?gene=SCUBE2
VPS13B	Vacuolar Protein Sorting 13 Homolog B	Protein Coding	40	GC08P099011	1.11836	https://www.genecards.org/cgi-bin/carddisp.pl?gene=VPS13B
ZNF423	Zinc Finger Protein 423	Protein Coding	40	GC16M049487	1.11836	https://www.genecards.org/cgi-bin/carddisp.pl?gene=ZNF423
NELL2	Neural EGFL Like 2	Protein Coding	39	GC12M044509	1.11836	https://www.genecards.org/cgi-bin/carddisp.pl?gene=NELL2
FRMD7	FERM Domain Containing 7	Protein Coding	39	GC0XM132077	1.11836	https://www.genecards.org/cgi-bin/carddisp.pl?gene=FRMD7
GAS7	Growth Arrest Specific 7	Protein Coding	39	GC17M009910	1.11836	https://www.genecards.org/cgi-bin/carddisp.pl?gene=GAS7
AADAT	Aminoadipate Aminotransferase	Protein Coding	39	GC04M170060	1.11836	https://www.genecards.org/cgi-bin/carddisp.pl?gene=AADAT
PPP2R3C	Protein Phosphatase 2 Regulatory Subunit B''Gamma	Protein Coding	39	GC14M035085	1.11836	https://www.genecards.org/cgi-bin/carddisp.pl?gene=PPP2R3C
PTPRR	Protein Tyrosine Phosphatase Receptor Type R	Protein Coding	39	GC12M070638	1.11836	https://www.genecards.org/cgi-bin/carddisp.pl?gene=PTPRR
RPS11	Ribosomal Protein S11	Protein Coding	39	GC19P049496	1.11836	https://www.genecards.org/cgi-bin/carddisp.pl?gene=RPS11
SV2C	Synaptic Vesicle Glycoprotein 2C	Protein Coding	39	GC05P075847	1.11836	https://www.genecards.org/cgi-bin/carddisp.pl?gene=SV2C
ARID3A	AT-Rich Interaction Domain 3A	Protein Coding	39	GC19P002168	1.11836	https://www.genecards.org/cgi-bin/carddisp.pl?gene=ARID3A
ASIC2	Acid Sensing Ion Channel Subunit 2	Protein Coding	39	GC17M033013	1.11836	https://www.genecards.org/cgi-bin/carddisp.pl?gene=ASIC2
DYNLRB2	Dynein Light Chain Roadblock-Type 2	Protein Coding	39	GC16P080540	1.11836	https://www.genecards.org/cgi-bin/carddisp.pl?gene=DYNLRB2
CSMD1	CUB And Sushi Multiple Domains 1	Protein Coding	39	GC08M002953	1.11836	https://www.genecards.org/cgi-bin/carddisp.pl?gene=CSMD1
LMO3	LIM Domain Only 3	Protein Coding	39	GC12M016548	1.11836	https://www.genecards.org/cgi-bin/carddisp.pl?gene=LMO3
PRMT6	Protein Arginine Methyltransferase 6	Protein Coding	39	GC01P107056	1.11836	https://www.genecards.org/cgi-bin/carddisp.pl?gene=PRMT6
COX6C	Cytochrome C Oxidase Subunit 6C	Protein Coding	39	GC08M099899	1.11836	https://www.genecards.org/cgi-bin/carddisp.pl?gene=COX6C
UXS1	UDP-Glucuronate Decarboxylase 1	Protein Coding	39	GC02M106094	1.11836	https://www.genecards.org/cgi-bin/carddisp.pl?gene=UXS1
UNC5D	Unc-5 Netrin Receptor D	Protein Coding	39	GC08P035235	1.11836	https://www.genecards.org/cgi-bin/carddisp.pl?gene=UNC5D
NAPB	NSF Attachment Protein Beta	Protein Coding	38	GC20M023374	1.11836	https://www.genecards.org/cgi-bin/carddisp.pl?gene=NAPB
MYOM2	Myomesin 2	Protein Coding	38	GC08P002045	1.11836	https://www.genecards.org/cgi-bin/carddisp.pl?gene=MYOM2
NDST4	N-Deacetylase And N-Sulfotransferase 4	Protein Coding	38	GC04M114827	1.11836	https://www.genecards.org/cgi-bin/carddisp.pl?gene=NDST4
FAM13A	Family With Sequence Similarity 13 Member A	Protein Coding	38	GC04M088725	1.11836	https://www.genecards.org/cgi-bin/carddisp.pl?gene=FAM13A
GOLPH3	Golgi Phosphoprotein 3	Protein Coding	38	GC05M032124	1.11836	https://www.genecards.org/cgi-bin/carddisp.pl?gene=GOLPH3
IQCE	IQ Motif Containing E	Protein Coding	38	GC07P002558	1.11836	https://www.genecards.org/cgi-bin/carddisp.pl?gene=IQCE
MYRIP	Myosin VIIA And Rab Interacting Protein	Protein Coding	38	GC03P039826	1.11836	https://www.genecards.org/cgi-bin/carddisp.pl?gene=MYRIP
GTF2H3	General Transcription Factor IIH Subunit 3	Protein Coding	38	GC12P123633	1.11836	https://www.genecards.org/cgi-bin/carddisp.pl?gene=GTF2H3
GLIS3	GLIS Family Zinc Finger 3	Protein Coding	38	GC09M003816	1.11836	https://www.genecards.org/cgi-bin/carddisp.pl?gene=GLIS3
PDZD2	PDZ Domain Containing 2	Protein Coding	38	GC05P031639	1.11836	https://www.genecards.org/cgi-bin/carddisp.pl?gene=PDZD2
RCVRN	Recoverin	Protein Coding	38	GC17M009896	1.11836	https://www.genecards.org/cgi-bin/carddisp.pl?gene=RCVRN
SETD1B	SET Domain Containing 1B, Histone Lysine Methyltransferase	Protein Coding	38	GC12P125520	1.11836	https://www.genecards.org/cgi-bin/carddisp.pl?gene=SETD1B
TCTN2	Tectonic Family Member 2	Protein Coding	38	GC12P123671	1.11836	https://www.genecards.org/cgi-bin/carddisp.pl?gene=TCTN2
TRIM44	Tripartite Motif Containing 44	Protein Coding	38	GC11P035684	1.11836	https://www.genecards.org/cgi-bin/carddisp.pl?gene=TRIM44
ST18	ST18 C2H2C-Type Zinc Finger Transcription Factor	Protein Coding	38	GC08M052110	1.11836	https://www.genecards.org/cgi-bin/carddisp.pl?gene=ST18
SPOCK2	SPARC (Osteonectin), Cwcv And Kazal Like Domains Proteoglycan 2	Protein Coding	38	GC10M072059	1.11836	https://www.genecards.org/cgi-bin/carddisp.pl?gene=SPOCK2
CCRL2	C-C Motif Chemokine Receptor Like 2	Protein Coding	38	GC03P046407	1.11836	https://www.genecards.org/cgi-bin/carddisp.pl?gene=CCRL2
ENPP6	Ectonucleotide Pyrophosphatase/Phosphodiesterase 6	Protein Coding	38	GC04M184088	1.11836	https://www.genecards.org/cgi-bin/carddisp.pl?gene=ENPP6
DLGAP2	DLG Associated Protein 2	Protein Coding	38	GC08P000739	1.11836	https://www.genecards.org/cgi-bin/carddisp.pl?gene=DLGAP2
BCL2L14	BCL2 Like 14	Protein Coding	38	GC12P012049	1.11836	https://www.genecards.org/cgi-bin/carddisp.pl?gene=BCL2L14
IMMP2L	Inner Mitochondrial Membrane Peptidase Subunit 2	Protein Coding	38	GC07M110663	1.11836	https://www.genecards.org/cgi-bin/carddisp.pl?gene=IMMP2L
RBFOX1	RNA Binding Fox-1 Homolog 1	Protein Coding	38	GC16P009999	1.11836	https://www.genecards.org/cgi-bin/carddisp.pl?gene=RBFOX1
PLCL2	Phospholipase C Like 2	Protein Coding	38	GC03P016804	1.11836	https://www.genecards.org/cgi-bin/carddisp.pl?gene=PLCL2
NAALADL2	N-Acetylated Alpha-Linked Acidic Dipeptidase Like 2	Protein Coding	37	GC03P174438	1.11836	https://www.genecards.org/cgi-bin/carddisp.pl?gene=NAALADL2
MYO1F	Myosin IF	Protein Coding	37	GC19M008520	1.11836	https://www.genecards.org/cgi-bin/carddisp.pl?gene=MYO1F
GATB	Glutamyl-TRNA Amidotransferase Subunit B	Protein Coding	37	GC04M151670	1.11836	https://www.genecards.org/cgi-bin/carddisp.pl?gene=GATB
FAM126A	Family With Sequence Similarity 126 Member A	Protein Coding	37	GC07M022889	1.11836	https://www.genecards.org/cgi-bin/carddisp.pl?gene=FAM126A
FAM177A1	Family With Sequence Similarity 177 Member A1	Protein Coding	37	GC14P035044	1.11836	https://www.genecards.org/cgi-bin/carddisp.pl?gene=FAM177A1
GUCY2F	Guanylate Cyclase 2F, Retinal	Protein Coding	37	GC0XM109372	1.11836	https://www.genecards.org/cgi-bin/carddisp.pl?gene=GUCY2F
NFKBIZ	NFKB Inhibitor Zeta	Protein Coding	37	GC03P101827	1.11836	https://www.genecards.org/cgi-bin/carddisp.pl?gene=NFKBIZ
NSUN3	NOP2/Sun RNA Methyltransferase 3	Protein Coding	37	GC03P094062	1.11836	https://www.genecards.org/cgi-bin/carddisp.pl?gene=NSUN3
POU2AF1	POU Class 2 Homeobox Associating Factor 1	Protein Coding	37	GC11M111352	1.11836	https://www.genecards.org/cgi-bin/carddisp.pl?gene=POU2AF1
RRAGD	Ras Related GTP Binding D	Protein Coding	37	GC06M089364	1.11836	https://www.genecards.org/cgi-bin/carddisp.pl?gene=RRAGD
RHOF	Ras Homolog Family Member F, Filopodia Associated	Protein Coding	37	GC12M121777	1.11836	https://www.genecards.org/cgi-bin/carddisp.pl?gene=RHOF
SH3BGRL	SH3 Domain Binding Glutamate Rich Protein Like	Protein Coding	37	GC0XP081201	1.11836	https://www.genecards.org/cgi-bin/carddisp.pl?gene=SH3BGRL
SDK1	Sidekick Cell Adhesion Molecule 1	Protein Coding	37	GC07P003307	1.11836	https://www.genecards.org/cgi-bin/carddisp.pl?gene=SDK1
ANKRD6	Ankyrin Repeat Domain 6	Protein Coding	37	GC06P089433	1.11836	https://www.genecards.org/cgi-bin/carddisp.pl?gene=ANKRD6
ALG12	ALG12 Alpha-1,6-Mannosyltransferase	Protein Coding	37	GC22M055211	1.11836	https://www.genecards.org/cgi-bin/carddisp.pl?gene=ALG12
CCL26	C-C Motif Chemokine Ligand 26	Protein Coding	37	GC07M075769	1.11836	https://www.genecards.org/cgi-bin/carddisp.pl?gene=CCL26
DKKL1	Dickkopf Like Acrosomal Protein 1	Protein Coding	37	GC19P049360	1.11836	https://www.genecards.org/cgi-bin/carddisp.pl?gene=DKKL1
CIRBP	Cold Inducible RNA Binding Protein	Protein Coding	37	GC19P001259	1.11836	https://www.genecards.org/cgi-bin/carddisp.pl?gene=CIRBP
CLYBL	Citramalyl-CoA Lyase	Protein Coding	37	GC13P099606	1.11836	https://www.genecards.org/cgi-bin/carddisp.pl?gene=CLYBL
BTG4	BTG Anti-Proliferation Factor 4	Protein Coding	37	GC11M111385	1.11836	https://www.genecards.org/cgi-bin/carddisp.pl?gene=BTG4
APBA3	Amyloid Beta Precursor Protein Binding Family A Member 3	Protein Coding	37	GC19M003750	1.11836	https://www.genecards.org/cgi-bin/carddisp.pl?gene=APBA3
AHNAK	AHNAK Nucleoprotein	Protein Coding	37	GC11M084537	1.11836	https://www.genecards.org/cgi-bin/carddisp.pl?gene=AHNAK
AP3M1	Adaptor Related Protein Complex 3 Subunit Mu 1	Protein Coding	37	GC10M074120	1.11836	https://www.genecards.org/cgi-bin/carddisp.pl?gene=AP3M1
PTOV1	PTOV1 Extended AT-Hook Containing Adaptor Protein	Protein Coding	37	GC19P052357	1.11836	https://www.genecards.org/cgi-bin/carddisp.pl?gene=PTOV1
RAB11FIP4	RAB11 Family Interacting Protein 4	Protein Coding	37	GC17P031391	1.11836	https://www.genecards.org/cgi-bin/carddisp.pl?gene=RAB11FIP4
RASIP1	Ras Interacting Protein 1	Protein Coding	37	GC19M048720	1.11836	https://www.genecards.org/cgi-bin/carddisp.pl?gene=RASIP1
PPM1H	Protein Phosphatase, Mg2+/Mn2+ Dependent 1H	Protein Coding	37	GC12M062643	1.11836	https://www.genecards.org/cgi-bin/carddisp.pl?gene=PPM1H
ARL4A	ADP Ribosylation Factor Like GTPase 4A	Protein Coding	37	GC07P012712	1.11836	https://www.genecards.org/cgi-bin/carddisp.pl?gene=ARL4A
USP26	Ubiquitin Specific Peptidase 26	Protein Coding	37	GC0XM133024	1.11836	https://www.genecards.org/cgi-bin/carddisp.pl?gene=USP26
ZNF699	Zinc Finger Protein 699	Protein Coding	37	GC19M009294	1.11836	https://www.genecards.org/cgi-bin/carddisp.pl?gene=ZNF699
WDR19	WD Repeat Domain 19	Protein Coding	37	GC04P039184	1.11836	https://www.genecards.org/cgi-bin/carddisp.pl?gene=WDR19
NEU4	Neuraminidase 4	Protein Coding	36	GC02P241808	1.11836	https://www.genecards.org/cgi-bin/carddisp.pl?gene=NEU4
EAPP	E2F Associated Phosphoprotein	Protein Coding	36	GC14M034516	1.11836	https://www.genecards.org/cgi-bin/carddisp.pl?gene=EAPP
EMP1	Epithelial Membrane Protein 1	Protein Coding	36	GC12P013196	1.11836	https://www.genecards.org/cgi-bin/carddisp.pl?gene=EMP1
HSD17B14	Hydroxysteroid 17-Beta Dehydrogenase 14	Protein Coding	36	GC19M048813	1.11836	https://www.genecards.org/cgi-bin/carddisp.pl?gene=HSD17B14
HS3ST4	Heparan Sulfate-Glucosamine 3-Sulfotransferase 4	Protein Coding	36	GC16P027636	1.11836	https://www.genecards.org/cgi-bin/carddisp.pl?gene=HS3ST4
JMY	Junction Mediating And Regulatory Protein, P53 Cofactor	Protein Coding	36	GC05P079236	1.11836	https://www.genecards.org/cgi-bin/carddisp.pl?gene=JMY
KBTBD8	Kelch Repeat And BTB Domain Containing 8	Protein Coding	36	GC03P066998	1.11836	https://www.genecards.org/cgi-bin/carddisp.pl?gene=KBTBD8
NEURL1	Neuralized E3 Ubiquitin Protein Ligase 1	Protein Coding	36	GC10P103493	1.11836	https://www.genecards.org/cgi-bin/carddisp.pl?gene=NEURL1
GZF1	GDNF Inducible Zinc Finger Protein 1	Protein Coding	36	GC20P023361	1.11836	https://www.genecards.org/cgi-bin/carddisp.pl?gene=GZF1
NXT1	Nuclear Transport Factor 2 Like Export Factor 1	Protein Coding	36	GC20P023350	1.11836	https://www.genecards.org/cgi-bin/carddisp.pl?gene=NXT1
RBMS3	RNA Binding Motif Single Stranded Interacting Protein 3	Protein Coding	36	GC03P028575	1.11836	https://www.genecards.org/cgi-bin/carddisp.pl?gene=RBMS3
RNF182	Ring Finger Protein 182	Protein Coding	36	GC06P013924	1.11836	https://www.genecards.org/cgi-bin/carddisp.pl?gene=RNF182
SURF2	Surfeit 2	Protein Coding	36	GC09P133980	1.11836	https://www.genecards.org/cgi-bin/carddisp.pl?gene=SURF2
TAF5	TATA-Box Binding Protein Associated Factor 5	Protein Coding	36	GC10P103368	1.11836	https://www.genecards.org/cgi-bin/carddisp.pl?gene=TAF5
STK32A	Serine/Threonine Kinase 32A	Protein Coding	36	GC05P147234	1.11836	https://www.genecards.org/cgi-bin/carddisp.pl?gene=STK32A
TMTC1	Transmembrane O-Mannosyltransferase Targeting Cadherins 1	Protein Coding	36	GC12M029500	1.11836	https://www.genecards.org/cgi-bin/carddisp.pl?gene=TMTC1
TOMM7	Translocase Of Outer Mitochondrial Membrane 7	Protein Coding	36	GC07M022816	1.11836	https://www.genecards.org/cgi-bin/carddisp.pl?gene=TOMM7
SCGB2A1	Secretoglobin Family 2A Member 1	Protein Coding	36	GC11P062227	1.11836	https://www.genecards.org/cgi-bin/carddisp.pl?gene=SCGB2A1
SNX19	Sorting Nexin 19	Protein Coding	36	GC11M130868	1.11836	https://www.genecards.org/cgi-bin/carddisp.pl?gene=SNX19
CHODL	Chondrolectin	Protein Coding	36	GC21P017819	1.11836	https://www.genecards.org/cgi-bin/carddisp.pl?gene=CHODL
ASB3	Ankyrin Repeat And SOCS Box Containing 3	Protein Coding	36	GC02M053532	1.11836	https://www.genecards.org/cgi-bin/carddisp.pl?gene=ASB3
ERI3	ERI1 Exoribonuclease Family Member 3	Protein Coding	36	GC01M044221	1.11836	https://www.genecards.org/cgi-bin/carddisp.pl?gene=ERI3
DBX2	Developing Brain Homeobox 2	Protein Coding	36	GC12M045014	1.11836	https://www.genecards.org/cgi-bin/carddisp.pl?gene=DBX2
CPQ	Carboxypeptidase Q	Protein Coding	36	GC08P096645	1.11836	https://www.genecards.org/cgi-bin/carddisp.pl?gene=CPQ
CHRAC1	Chromatin Accessibility Complex Subunit 1	Protein Coding	36	GC08P140511	1.11836	https://www.genecards.org/cgi-bin/carddisp.pl?gene=CHRAC1
ADGRL4	Adhesion G Protein-Coupled Receptor L4	Protein Coding	36	GC01M078889	1.11836	https://www.genecards.org/cgi-bin/carddisp.pl?gene=ADGRL4
ICAM4	Intercellular Adhesion Molecule 4 (Landsteiner-Wiener Blood Group)	Protein Coding	36	GC19P010286	1.11836	https://www.genecards.org/cgi-bin/carddisp.pl?gene=ICAM4
LRRC2	Leucine Rich Repeat Containing 2	Protein Coding	36	GC03M046515	1.11836	https://www.genecards.org/cgi-bin/carddisp.pl?gene=LRRC2
MAL	Mal, T Cell Differentiation Protein	Protein Coding	36	GC02P095025	1.11836	https://www.genecards.org/cgi-bin/carddisp.pl?gene=MAL
DDX55	DEAD-Box Helicase 55	Protein Coding	36	GC12P123602	1.11836	https://www.genecards.org/cgi-bin/carddisp.pl?gene=DDX55
MED22	Mediator Complex Subunit 22	Protein Coding	36	GC09M133338	1.11836	https://www.genecards.org/cgi-bin/carddisp.pl?gene=MED22
RAP2C	RAP2C, Member Of RAS Oncogene Family	Protein Coding	36	GC0XM132203	1.11836	https://www.genecards.org/cgi-bin/carddisp.pl?gene=RAP2C
PIEZO2	Piezo Type Mechanosensitive Ion Channel Component 2	Protein Coding	36	GC18M010670	1.11836	https://www.genecards.org/cgi-bin/carddisp.pl?gene=PIEZO2
UBAC1	UBA Domain Containing 1	Protein Coding	36	GC09M135932	1.11836	https://www.genecards.org/cgi-bin/carddisp.pl?gene=UBAC1
ZIC5	Zic Family Member 5	Protein Coding	36	GC13M099962	1.11836	https://www.genecards.org/cgi-bin/carddisp.pl?gene=ZIC5
NOC3L	NOC3 Like DNA Replication Regulator	Protein Coding	35	GC10M094333	1.11836	https://www.genecards.org/cgi-bin/carddisp.pl?gene=NOC3L
GBA3	Glucosylceramidase Beta 3 (Gene/Pseudogene)	Protein Coding	35	GC04P022694	1.11836	https://www.genecards.org/cgi-bin/carddisp.pl?gene=GBA3
INSC	INSC Spindle Orientation Adaptor Protein	Protein Coding	35	GC11P015127	1.11836	https://www.genecards.org/cgi-bin/carddisp.pl?gene=INSC
GPR20	G Protein-Coupled Receptor 20	Protein Coding	35	GC08M141356	1.11836	https://www.genecards.org/cgi-bin/carddisp.pl?gene=GPR20
RSAD1	Radical S-Adenosyl Methionine Domain Containing 1	Protein Coding	35	GC17P050478	1.11836	https://www.genecards.org/cgi-bin/carddisp.pl?gene=RSAD1
SH3D19	SH3 Domain Containing 19	Protein Coding	35	GC04M151102	1.11836	https://www.genecards.org/cgi-bin/carddisp.pl?gene=SH3D19
ALDH16A1	Aldehyde Dehydrogenase 16 Family Member A1	Protein Coding	35	GC19P049453	1.11836	https://www.genecards.org/cgi-bin/carddisp.pl?gene=ALDH16A1
CASD1	CAS1 Domain Containing 1	Protein Coding	35	GC07P094509	1.11836	https://www.genecards.org/cgi-bin/carddisp.pl?gene=CASD1
BRWD3	Bromodomain And WD Repeat Domain Containing 3	Protein Coding	35	GC0XM080669	1.11836	https://www.genecards.org/cgi-bin/carddisp.pl?gene=BRWD3
CABP1	Calcium Binding Protein 1	Protein Coding	35	GC12P120642	1.11836	https://www.genecards.org/cgi-bin/carddisp.pl?gene=CABP1
LUZP2	Leucine Zipper Protein 2	Protein Coding	35	GC11P024518	1.11836	https://www.genecards.org/cgi-bin/carddisp.pl?gene=LUZP2
MEX3D	Mex-3 RNA Binding Family Member D	Protein Coding	35	GC19M001554	1.11836	https://www.genecards.org/cgi-bin/carddisp.pl?gene=MEX3D
PLEKHA4	Pleckstrin Homology Domain Containing A4	Protein Coding	35	GC19M048837	1.11836	https://www.genecards.org/cgi-bin/carddisp.pl?gene=PLEKHA4
RFX4	Regulatory Factor X4	Protein Coding	35	GC12P106583	1.11836	https://www.genecards.org/cgi-bin/carddisp.pl?gene=RFX4
WIZ	WIZ Zinc Finger	Protein Coding	35	GC19M015419	1.11836	https://www.genecards.org/cgi-bin/carddisp.pl?gene=WIZ
XIRP2	Xin Actin Binding Repeat Containing 2	Protein Coding	35	GC02P166888	1.11836	https://www.genecards.org/cgi-bin/carddisp.pl?gene=XIRP2
ZNF496	Zinc Finger Protein 496	Protein Coding	35	GC01M247297	1.11836	https://www.genecards.org/cgi-bin/carddisp.pl?gene=ZNF496
NKAIN2	Sodium/Potassium Transporting ATPase Interacting 2	Protein Coding	34	GC06P123803	1.11836	https://www.genecards.org/cgi-bin/carddisp.pl?gene=NKAIN2
N4BP2	NEDD4 Binding Protein 2	Protein Coding	34	GC04P040058	1.11836	https://www.genecards.org/cgi-bin/carddisp.pl?gene=N4BP2
EML3	EMAP Like 3	Protein Coding	34	GC11M062602	1.11836	https://www.genecards.org/cgi-bin/carddisp.pl?gene=EML3
GALNTL6	Polypeptide N-Acetylgalactosaminyltransferase Like 6	Protein Coding	34	GC04P171813	1.11836	https://www.genecards.org/cgi-bin/carddisp.pl?gene=GALNTL6
KBTBD11	Kelch Repeat And BTB Domain Containing 11	Protein Coding	34	GC08P001970	1.11836	https://www.genecards.org/cgi-bin/carddisp.pl?gene=KBTBD11
POC5	POC5 Centriolar Protein	Protein Coding	34	GC05M075674	1.11836	https://www.genecards.org/cgi-bin/carddisp.pl?gene=POC5
RGS22	Regulator Of G Protein Signaling 22	Protein Coding	34	GC08M099960	1.11836	https://www.genecards.org/cgi-bin/carddisp.pl?gene=RGS22
TSPAN11	Tetraspanin 11	Protein Coding	34	GC12P030926	1.11836	https://www.genecards.org/cgi-bin/carddisp.pl?gene=TSPAN11
UNC80	Unc-80 Homolog, NALCN Channel Complex Subunit	Protein Coding	34	GC02P209771	1.11836	https://www.genecards.org/cgi-bin/carddisp.pl?gene=UNC80
SLITRK4	SLIT And NTRK Like Family Member 4	Protein Coding	34	GC0XM143622	1.11836	https://www.genecards.org/cgi-bin/carddisp.pl?gene=SLITRK4
CHERP	Calcium Homeostasis Endoplasmic Reticulum Protein	Protein Coding	34	GC19M016517	1.11836	https://www.genecards.org/cgi-bin/carddisp.pl?gene=CHERP
CEP97	Centrosomal Protein 97	Protein Coding	34	GC03P101723	1.11836	https://www.genecards.org/cgi-bin/carddisp.pl?gene=CEP97
ADAT3	Adenosine Deaminase TRNA Specific 3	Protein Coding	34	GC19P002325	1.11836	https://www.genecards.org/cgi-bin/carddisp.pl?gene=ADAT3
MED26	Mediator Complex Subunit 26	Protein Coding	34	GC19M016574	1.11836	https://www.genecards.org/cgi-bin/carddisp.pl?gene=MED26
RAB43	RAB43, Member RAS Oncogene Family	Protein Coding	34	GC03M129973	1.11836	https://www.genecards.org/cgi-bin/carddisp.pl?gene=RAB43
DLK2	Delta Like Non-Canonical Notch Ligand 2	Protein Coding	34	GC06M043450	1.11836	https://www.genecards.org/cgi-bin/carddisp.pl?gene=DLK2
ZNF426	Zinc Finger Protein 426	Protein Coding	34	GC19M009528	1.11836	https://www.genecards.org/cgi-bin/carddisp.pl?gene=ZNF426
ZBTB11	Zinc Finger And BTB Domain Containing 11	Protein Coding	34	GC03M101648	1.11836	https://www.genecards.org/cgi-bin/carddisp.pl?gene=ZBTB11
YIPF2	Yip1 Domain Family Member 2	Protein Coding	34	GC19M011046	1.11836	https://www.genecards.org/cgi-bin/carddisp.pl?gene=YIPF2
ZBTB2	Zinc Finger And BTB Domain Containing 2	Protein Coding	34	GC06M151364	1.11836	https://www.genecards.org/cgi-bin/carddisp.pl?gene=ZBTB2
NACC2	NACC Family Member 2	Protein Coding	33	GC09M136006	1.11836	https://www.genecards.org/cgi-bin/carddisp.pl?gene=NACC2
FXYD4	FXYD Domain Containing Ion Transport Regulator 4	Protein Coding	33	GC10P043371	1.11836	https://www.genecards.org/cgi-bin/carddisp.pl?gene=FXYD4
MMS22L	MMS22 Like, DNA Repair Protein	Protein Coding	33	GC06M097142	1.11836	https://www.genecards.org/cgi-bin/carddisp.pl?gene=MMS22L
MYOZ3	Myozenin 3	Protein Coding	33	GC05P150660	1.11836	https://www.genecards.org/cgi-bin/carddisp.pl?gene=MYOZ3
SYDE1	Synapse Defective Rho GTPase Homolog 1	Protein Coding	33	GC19P015107	1.11836	https://www.genecards.org/cgi-bin/carddisp.pl?gene=SYDE1
TBC1D8B	TBC1 Domain Family Member 8B	Protein Coding	33	GC0XP106802	1.11836	https://www.genecards.org/cgi-bin/carddisp.pl?gene=TBC1D8B
LMF2	Lipase Maturation Factor 2	Protein Coding	33	GC22M050502	1.11836	https://www.genecards.org/cgi-bin/carddisp.pl?gene=LMF2
MED16	Mediator Complex Subunit 16	Protein Coding	33	GC19M004323	1.11836	https://www.genecards.org/cgi-bin/carddisp.pl?gene=MED16
MIDN	Midnolin	Protein Coding	33	GC19P001248	1.11836	https://www.genecards.org/cgi-bin/carddisp.pl?gene=MIDN
SLC35E3	Solute Carrier Family 35 Member E3	Protein Coding	33	GC12P068746	1.11836	https://www.genecards.org/cgi-bin/carddisp.pl?gene=SLC35E3
TSPYL5	TSPY Like 5	Protein Coding	33	GC08M097273	1.11836	https://www.genecards.org/cgi-bin/carddisp.pl?gene=TSPYL5
ZBED4	Zinc Finger BED-Type Containing 4	Protein Coding	33	GC22P049853	1.11836	https://www.genecards.org/cgi-bin/carddisp.pl?gene=ZBED4
ZNF236	Zinc Finger Protein 236	Protein Coding	33	GC18P076822	1.11836	https://www.genecards.org/cgi-bin/carddisp.pl?gene=ZNF236
ZNF266	Zinc Finger Protein 266	Protein Coding	33	GC19M009412	1.11836	https://www.genecards.org/cgi-bin/carddisp.pl?gene=ZNF266
FAM114A1	Family With Sequence Similarity 114 Member A1	Protein Coding	32	GC04P038867	1.11836	https://www.genecards.org/cgi-bin/carddisp.pl?gene=FAM114A1
ISY1	ISY1 Splicing Factor Homolog	Protein Coding	32	GC03M129127	1.11836	https://www.genecards.org/cgi-bin/carddisp.pl?gene=ISY1
JADE2	Jade Family PHD Finger 2	Protein Coding	32	GC05P134524	1.11836	https://www.genecards.org/cgi-bin/carddisp.pl?gene=JADE2
FAM81A	Family With Sequence Similarity 81 Member A	Protein Coding	32	GC15P059372	1.11836	https://www.genecards.org/cgi-bin/carddisp.pl?gene=FAM81A
NYAP2	Neuronal Tyrosine-Phosphorylated Phosphoinositide-3-Kinase Adaptor 2	Protein Coding	32	GC02P225400	1.11836	https://www.genecards.org/cgi-bin/carddisp.pl?gene=NYAP2
OR10H2	Olfactory Receptor Family 10 Subfamily H Member 2	Protein Coding	32	GC19P015728	1.11836	https://www.genecards.org/cgi-bin/carddisp.pl?gene=OR10H2
POMZP3	POM121 And ZP3 Fusion	Protein Coding	32	GC07M076609	1.11836	https://www.genecards.org/cgi-bin/carddisp.pl?gene=POMZP3
RIC8B	RIC8 Guanine Nucleotide Exchange Factor B	Protein Coding	32	GC12P106774	1.11836	https://www.genecards.org/cgi-bin/carddisp.pl?gene=RIC8B
SCAF1	SR-Related CTD Associated Factor 1	Protein Coding	32	GC19P052339	1.11836	https://www.genecards.org/cgi-bin/carddisp.pl?gene=SCAF1
TMEM120B	Transmembrane Protein 120B	Protein Coding	32	GC12P121712	1.11836	https://www.genecards.org/cgi-bin/carddisp.pl?gene=TMEM120B
SBNO2	Strawberry Notch Homolog 2	Protein Coding	32	GC19M001107	1.11836	https://www.genecards.org/cgi-bin/carddisp.pl?gene=SBNO2
CALHM2	Calcium Homeostasis Modulator Family Member 2	Protein Coding	32	GC10M103446	1.11836	https://www.genecards.org/cgi-bin/carddisp.pl?gene=CALHM2
CST9	Cystatin 9	Protein Coding	32	GC20M023643	1.11836	https://www.genecards.org/cgi-bin/carddisp.pl?gene=CST9
COPRS	Coordinator Of PRMT5 And Differentiation Stimulator	Protein Coding	32	GC17M031851	1.11836	https://www.genecards.org/cgi-bin/carddisp.pl?gene=COPRS
C10orf90	Chromosome 10 Open Reading Frame 90	Protein Coding	32	GC10M126424	1.11836	https://www.genecards.org/cgi-bin/carddisp.pl?gene=C10orf90
MISP	Mitotic Spindle Positioning	Protein Coding	32	GC19P002144	1.11836	https://www.genecards.org/cgi-bin/carddisp.pl?gene=MISP
MIER2	MIER Family Member 2	Protein Coding	32	GC19M000305	1.11836	https://www.genecards.org/cgi-bin/carddisp.pl?gene=MIER2
ZNF559	Zinc Finger Protein 559	Protein Coding	32	GC19P009323	1.11836	https://www.genecards.org/cgi-bin/carddisp.pl?gene=ZNF559
ZNF561	Zinc Finger Protein 561	Protein Coding	32	GC19M009605	1.11836	https://www.genecards.org/cgi-bin/carddisp.pl?gene=ZNF561
ZNF562	Zinc Finger Protein 562	Protein Coding	32	GC19M009622	1.11836	https://www.genecards.org/cgi-bin/carddisp.pl?gene=ZNF562
ZDBF2	Zinc Finger DBF-Type Containing 2	Protein Coding	32	GC02P206274	1.11836	https://www.genecards.org/cgi-bin/carddisp.pl?gene=ZDBF2
FAM189A1	Family With Sequence Similarity 189 Member A1	Protein Coding	31	GC15M029249	1.11836	https://www.genecards.org/cgi-bin/carddisp.pl?gene=FAM189A1
FRMPD3	FERM And PDZ Domain Containing 3	Protein Coding	31	GC0XP107449	1.11836	https://www.genecards.org/cgi-bin/carddisp.pl?gene=FRMPD3
HMCES	5-Hydroxymethylcytosine Binding, ES Cell Specific	Protein Coding	31	GC03P129278	1.11836	https://www.genecards.org/cgi-bin/carddisp.pl?gene=HMCES
HSD11B1L	Hydroxysteroid 11-Beta Dehydrogenase 1 Like	Protein Coding	31	GC19P005680	1.11836	https://www.genecards.org/cgi-bin/carddisp.pl?gene=HSD11B1L
PRR12	Proline Rich 12	Protein Coding	31	GC19P049591	1.11836	https://www.genecards.org/cgi-bin/carddisp.pl?gene=PRR12
TMEM259	Transmembrane Protein 259	Protein Coding	31	GC19M004336	1.11836	https://www.genecards.org/cgi-bin/carddisp.pl?gene=TMEM259
SMIM14	Small Integral Membrane Protein 14	Protein Coding	31	GC04M039546	1.11836	https://www.genecards.org/cgi-bin/carddisp.pl?gene=SMIM14
CDKN2AIPNL	CDKN2A Interacting Protein N-Terminal Like	Protein Coding	31	GC05M134402	1.11836	https://www.genecards.org/cgi-bin/carddisp.pl?gene=CDKN2AIPNL
CSTL1	Cystatin Like 1	Protein Coding	31	GC20P023438	1.11836	https://www.genecards.org/cgi-bin/carddisp.pl?gene=CSTL1
C19orf44	Chromosome 19 Open Reading Frame 44	Protein Coding	31	GC19P050896	1.11836	https://www.genecards.org/cgi-bin/carddisp.pl?gene=C19orf44
RABL2B	RAB, Member Of RAS Oncogene Family Like 2B	Protein Coding	31	GC22M050767	1.11836	https://www.genecards.org/cgi-bin/carddisp.pl?gene=RABL2B
HMGN5	High Mobility Group Nucleosome Binding Domain 5	Protein Coding	30	GC0XM081113	1.11836	https://www.genecards.org/cgi-bin/carddisp.pl?gene=HMGN5
OR10H4	Olfactory Receptor Family 10 Subfamily H Member 4	Protein Coding	30	GC19P015950	1.11836	https://www.genecards.org/cgi-bin/carddisp.pl?gene=OR10H4
OR10H5	Olfactory Receptor Family 10 Subfamily H Member 5	Protein Coding	30	GC19P015767	1.11836	https://www.genecards.org/cgi-bin/carddisp.pl?gene=OR10H5
TFDP3	Transcription Factor Dp Family Member 3	Protein Coding	30	GC0XM133216	1.11836	https://www.genecards.org/cgi-bin/carddisp.pl?gene=TFDP3
SLC35G1	Solute Carrier Family 35 Member G1	Protein Coding	30	GC10P093893	1.11836	https://www.genecards.org/cgi-bin/carddisp.pl?gene=SLC35G1
ARHGAP45	Rho GTPase Activating Protein 45	Protein Coding	30	GC19P001065	1.11836	https://www.genecards.org/cgi-bin/carddisp.pl?gene=ARHGAP45
ARMT1	Acidic Residue Methyltransferase 1	Protein Coding	30	GC06P151452	1.11836	https://www.genecards.org/cgi-bin/carddisp.pl?gene=ARMT1
CCDC171	Coiled-Coil Domain Containing 171	Protein Coding	30	GC09P015562	1.11836	https://www.genecards.org/cgi-bin/carddisp.pl?gene=CCDC171
C7orf50	Chromosome 7 Open Reading Frame 50	Protein Coding	30	GC07M001031	1.11836	https://www.genecards.org/cgi-bin/carddisp.pl?gene=C7orf50
ATXN7L3B	Ataxin 7 Like 3B	Protein Coding	30	GC12P074537	1.11836	https://www.genecards.org/cgi-bin/carddisp.pl?gene=ATXN7L3B
OBP2B	Odorant Binding Protein 2B	Protein Coding	30	GC09M133205	1.11836	https://www.genecards.org/cgi-bin/carddisp.pl?gene=OBP2B
RGPD3	RANBP2 Like And GRIP Domain Containing 3	Protein Coding	30	GC02M106373	1.11836	https://www.genecards.org/cgi-bin/carddisp.pl?gene=RGPD3
ZNF846	Zinc Finger Protein 846	Protein Coding	30	GC19M009816	1.11836	https://www.genecards.org/cgi-bin/carddisp.pl?gene=ZNF846
ZGLP1	Zinc Finger GATA Like Protein 1	Protein Coding	30	GC19M010304	1.11836	https://www.genecards.org/cgi-bin/carddisp.pl?gene=ZGLP1
ZNF121	Zinc Finger Protein 121	Protein Coding	30	GC19M009561	1.11836	https://www.genecards.org/cgi-bin/carddisp.pl?gene=ZNF121
C2CD4C	C2 Calcium Dependent Domain Containing 4C	Protein Coding	29	GC19M004277	1.11836	https://www.genecards.org/cgi-bin/carddisp.pl?gene=C2CD4C
OR10H3	Olfactory Receptor Family 10 Subfamily H Member 3	Protein Coding	29	GC19P015745	1.11836	https://www.genecards.org/cgi-bin/carddisp.pl?gene=OR10H3
CCDC172	Coiled-Coil Domain Containing 172	Protein Coding	29	GC10P116324	1.11836	https://www.genecards.org/cgi-bin/carddisp.pl?gene=CCDC172
C4orf45	Chromosome 4 Open Reading Frame 45	Protein Coding	29	GC04M158893	1.11836	https://www.genecards.org/cgi-bin/carddisp.pl?gene=C4orf45
MAP10	Microtubule Associated Protein 10	Protein Coding	29	GC01P232804	1.11836	https://www.genecards.org/cgi-bin/carddisp.pl?gene=MAP10
PRORP	Protein Only RNase P Catalytic Subunit	Protein Coding	29	GC14P035306	1.11836	https://www.genecards.org/cgi-bin/carddisp.pl?gene=PRORP
PRSS48	Serine Protease 48	Protein Coding	29	GC04P151277	1.11836	https://www.genecards.org/cgi-bin/carddisp.pl?gene=PRSS48
NUP62CL	Nucleoporin 62 C-Terminal Like	Protein Coding	29	GC0XM107123	1.11836	https://www.genecards.org/cgi-bin/carddisp.pl?gene=NUP62CL
TMEM196	Transmembrane Protein 196	Protein Coding	29	GC07M019758	1.11836	https://www.genecards.org/cgi-bin/carddisp.pl?gene=TMEM196
CALHM3	Calcium Homeostasis Modulator 3	Protein Coding	28	GC10M103473	1.11836	https://www.genecards.org/cgi-bin/carddisp.pl?gene=CALHM3
MALRD1	MAM And LDL Receptor Class A Domain Containing 1	Protein Coding	28	GC10P019048	1.11836	https://www.genecards.org/cgi-bin/carddisp.pl?gene=MALRD1
TMEM170B	Transmembrane Protein 170B	Protein Coding	27	GC06P011537	1.11836	https://www.genecards.org/cgi-bin/carddisp.pl?gene=TMEM170B
SWSAP1	SWIM-Type Zinc Finger 7 Associated Protein 1	Protein Coding	27	GC19P011374	1.11836	https://www.genecards.org/cgi-bin/carddisp.pl?gene=SWSAP1
VCX2	Variable Charge X-Linked 2	Protein Coding	27	GC0XM008169	1.11836	https://www.genecards.org/cgi-bin/carddisp.pl?gene=VCX2
LCE2B	Late Cornified Envelope 2B	Protein Coding	26	GC01P152686	1.11836	https://www.genecards.org/cgi-bin/carddisp.pl?gene=LCE2B
DUSP29	Dual Specificity Phosphatase 29	Protein Coding	26	GC10M075028	1.11836	https://www.genecards.org/cgi-bin/carddisp.pl?gene=DUSP29
SERTM1	Serine Rich And Transmembrane Domain Containing 1	Protein Coding	26	GC13P036673	1.11836	https://www.genecards.org/cgi-bin/carddisp.pl?gene=SERTM1
TMEM178B	Transmembrane Protein 178B	Protein Coding	26	GC07P141203	1.11836	https://www.genecards.org/cgi-bin/carddisp.pl?gene=TMEM178B
SMIM7	Small Integral Membrane Protein 7	Protein Coding	26	GC19M016630	1.11836	https://www.genecards.org/cgi-bin/carddisp.pl?gene=SMIM7
ECRG4	ECRG4 Augurin Precursor	Protein Coding	26	GC02P106063	1.11836	https://www.genecards.org/cgi-bin/carddisp.pl?gene=ECRG4
SELENOO	Selenoprotein O	Protein Coding	25	GC22P050201	1.11836	https://www.genecards.org/cgi-bin/carddisp.pl?gene=SELENOO
C18orf63	Chromosome 18 Open Reading Frame 63	Protein Coding	25	GC18P074315	1.11836	https://www.genecards.org/cgi-bin/carddisp.pl?gene=C18orf63
DCDC2C	Doublecortin Domain Containing 2C	Protein Coding	25	GC02P003703	1.11836	https://www.genecards.org/cgi-bin/carddisp.pl?gene=DCDC2C
RFLNA	Refilin A	Protein Coding	25	GC12P125567	1.11836	https://www.genecards.org/cgi-bin/carddisp.pl?gene=RFLNA
LCE2A	Late Cornified Envelope 2A	Protein Coding	24	GC01P152698	1.11836	https://www.genecards.org/cgi-bin/carddisp.pl?gene=LCE2A
C10orf105	Chromosome 10 Open Reading Frame 105	Protein Coding	24	GC10M071711	1.11836	https://www.genecards.org/cgi-bin/carddisp.pl?gene=C10orf105
YJU2	YJU2 Splicing Factor Homolog	Protein Coding	24	GC19P004253	1.11836	https://www.genecards.org/cgi-bin/carddisp.pl?gene=YJU2
GARIN2	Golgi Associated RAB2 Interactor Family Member 2	Protein Coding	23	GC14P067192	1.11836	https://www.genecards.org/cgi-bin/carddisp.pl?gene=GARIN2
COLCA2	Colorectal Cancer Associated 2	Protein Coding	23	GC11P111298	1.11836	https://www.genecards.org/cgi-bin/carddisp.pl?gene=COLCA2
FHIP1A	FHF Complex Subunit HOOK Interacting Protein 1A	Protein Coding	22	GC04P151411	1.11836	https://www.genecards.org/cgi-bin/carddisp.pl?gene=FHIP1A
COLCA1	Colorectal Cancer Associated 1	RNA Gene	22	GC11M111290	1.11836	https://www.genecards.org/cgi-bin/carddisp.pl?gene=COLCA1
DIPK1C	Divergent Protein Kinase Domain 1C	Protein Coding	22	GC18M074435	1.11836	https://www.genecards.org/cgi-bin/carddisp.pl?gene=DIPK1C
MIR34B	MicroRNA 34b	RNA Gene	22	GC11P111686	1.11836	https://www.genecards.org/cgi-bin/carddisp.pl?gene=MIR34B
MIR34C	MicroRNA 34c	RNA Gene	22	GC11P111675	1.11836	https://www.genecards.org/cgi-bin/carddisp.pl?gene=MIR34C
RMST	Rhabdomyosarcoma 2 Associated Transcript	RNA Gene	22	GC12P097431	1.11836	https://www.genecards.org/cgi-bin/carddisp.pl?gene=RMST
HOATZ	HOATZ Cilia And Flagella Associated Protein	Protein Coding	21	GC11P111681	1.11836	https://www.genecards.org/cgi-bin/carddisp.pl?gene=HOATZ
CFAP92	Cilia And Flagella Associated Protein 92 (Putative)	Protein Coding	21	GC03M130005	1.11836	https://www.genecards.org/cgi-bin/carddisp.pl?gene=CFAP92
ADM5	Adrenomedullin 5 (Putative)	Protein Coding	21	GC19P052334	1.11836	https://www.genecards.org/cgi-bin/carddisp.pl?gene=ADM5
HNF1A-AS1	HNF1A Antisense RNA 1	RNA Gene	19	GC12M122037	1.11836	https://www.genecards.org/cgi-bin/carddisp.pl?gene=HNF1A-AS1
C9orf92	Chromosome 9 Open Reading Frame 92	RNA Gene	19	GC09M016194	1.11836	https://www.genecards.org/cgi-bin/carddisp.pl?gene=C9orf92
CIRBP-AS1	CIRBP Antisense RNA 1	RNA Gene	18	GC19M004342	1.11836	https://www.genecards.org/cgi-bin/carddisp.pl?gene=CIRBP-AS1
LINC00877	Long Intergenic Non-Protein Coding RNA 877	RNA Gene	17	GC03M071897	1.11836	https://www.genecards.org/cgi-bin/carddisp.pl?gene=LINC00877
GSG1L2	GSG1 Like 2	Protein Coding	17	GC17M010172	1.11836	https://www.genecards.org/cgi-bin/carddisp.pl?gene=GSG1L2
GUSBP1	GUSB Pseudogene 1	Pseudogene	17	GC05P021337	1.11836	https://www.genecards.org/cgi-bin/carddisp.pl?gene=GUSBP1
SNORD24	Small Nucleolar RNA, C/D Box 24	RNA Gene	17	GC09P133349	1.11836	https://www.genecards.org/cgi-bin/carddisp.pl?gene=SNORD24
SNORD33	Small Nucleolar RNA, C/D Box 33	RNA Gene	17	GC19P052317	1.11836	https://www.genecards.org/cgi-bin/carddisp.pl?gene=SNORD33
MIR651	MicroRNA 651	RNA Gene	17	GC0XP008056	1.11836	https://www.genecards.org/cgi-bin/carddisp.pl?gene=MIR651
LINC00540	Long Intergenic Non-Protein Coding RNA 540	RNA Gene	16	GC13P021974	1.11836	https://www.genecards.org/cgi-bin/carddisp.pl?gene=LINC00540
HSP90AA4P	Heat Shock Protein 90 Alpha Family Class A Member 4, Pseudogene	Pseudogene	16	GC04P189472	1.11836	https://www.genecards.org/cgi-bin/carddisp.pl?gene=HSP90AA4P
GLIS3-AS1	GLIS3 Antisense RNA 1	RNA Gene	16	GC09P003734	1.11836	https://www.genecards.org/cgi-bin/carddisp.pl?gene=GLIS3-AS1
POT1-AS1	POT1 Antisense RNA 1	RNA Gene	16	GC07P124929	1.11836	https://www.genecards.org/cgi-bin/carddisp.pl?gene=POT1-AS1
RPL32P3	Ribosomal Protein L32 Pseudogene 3	Pseudogene	16	GC03M129382	1.11836	https://www.genecards.org/cgi-bin/carddisp.pl?gene=RPL32P3
SNORD36A	Small Nucleolar RNA, C/D Box 36A	RNA Gene	16	GC09P133977	1.11836	https://www.genecards.org/cgi-bin/carddisp.pl?gene=SNORD36A
SNORD36B	Small Nucleolar RNA, C/D Box 36B	RNA Gene	16	GC09P133976	1.11836	https://www.genecards.org/cgi-bin/carddisp.pl?gene=SNORD36B
SNORD36C	Small Nucleolar RNA, C/D Box 36C	RNA Gene	16	GC09P133978	1.11836	https://www.genecards.org/cgi-bin/carddisp.pl?gene=SNORD36C
SNORD35B	Small Nucleolar RNA, C/D Box 35B	RNA Gene	16	GC19P052321	1.11836	https://www.genecards.org/cgi-bin/carddisp.pl?gene=SNORD35B
SNORD35A	Small Nucleolar RNA, C/D Box 35A	RNA Gene	16	GC19P052320	1.11836	https://www.genecards.org/cgi-bin/carddisp.pl?gene=SNORD35A
ERCC6L2-AS1	ERCC6L2 Antisense RNA 1	RNA Gene	16	GC09M095758	1.11836	https://www.genecards.org/cgi-bin/carddisp.pl?gene=ERCC6L2-AS1
BUB1B-PAK6	BUB1B-PAK6 Readthrough	Protein Coding	16	GC15P040219	1.11836	https://www.genecards.org/cgi-bin/carddisp.pl?gene=BUB1B-PAK6
LINC01089	Long Intergenic Non-Protein Coding RNA 1089	RNA Gene	16	GC12M122066	1.11836	https://www.genecards.org/cgi-bin/carddisp.pl?gene=LINC01089
LIFR-AS1	LIFR Antisense RNA 1	RNA Gene	15	GC05P038559	1.11836	https://www.genecards.org/cgi-bin/carddisp.pl?gene=LIFR-AS1
LINC01262	Long Intergenic Non-Protein Coding RNA 1262	RNA Gene	15	GC04P189661	1.11836	https://www.genecards.org/cgi-bin/carddisp.pl?gene=LINC01262
MIR365B	MicroRNA 365b	RNA Gene	15	GC17P049835	1.11836	https://www.genecards.org/cgi-bin/carddisp.pl?gene=MIR365B
LINC01237	Long Intergenic Non-Protein Coding RNA 1237	RNA Gene	14	GC02P241881	1.11836	https://www.genecards.org/cgi-bin/carddisp.pl?gene=LINC01237
ITGA9-AS1	ITGA9 Antisense RNA 1	RNA Gene	14	GC03M037788	1.11836	https://www.genecards.org/cgi-bin/carddisp.pl?gene=ITGA9-AS1
ILF3-DT	ILF3 Divergent Transcript	RNA Gene	14	GC19M010652	1.11836	https://www.genecards.org/cgi-bin/carddisp.pl?gene=ILF3-DT
LINC00856	Long Intergenic Non-Protein Coding RNA 856	RNA Gene	14	GC10P090571	1.11836	https://www.genecards.org/cgi-bin/carddisp.pl?gene=LINC00856
SNORD29	Small Nucleolar RNA, C/D Box 29	RNA Gene	14	GC11M062853	1.11836	https://www.genecards.org/cgi-bin/carddisp.pl?gene=SNORD29
UGDH-AS1	UGDH Antisense RNA 1	RNA Gene	14	GC04P039530	1.11836	https://www.genecards.org/cgi-bin/carddisp.pl?gene=UGDH-AS1
EGFLAM-AS1	EGFLAM Antisense RNA 1	RNA Gene	14	GC05M038426	1.11836	https://www.genecards.org/cgi-bin/carddisp.pl?gene=EGFLAM-AS1
LMCD1-AS1	LMCD1 Antisense RNA 1	RNA Gene	14	GC03M007996	1.11836	https://www.genecards.org/cgi-bin/carddisp.pl?gene=LMCD1-AS1
MIR646HG	MIR646 Host Gene	RNA Gene	14	GC20P060088	1.11836	https://www.genecards.org/cgi-bin/carddisp.pl?gene=MIR646HG
MIATNB	MIAT Neighbor	RNA Gene	14	GC22P033611	1.11836	https://www.genecards.org/cgi-bin/carddisp.pl?gene=MIATNB
RNF217-AS1	RNF217 Antisense RNA 1 (Head To Head)	RNA Gene	14	GC06M124563	1.11836	https://www.genecards.org/cgi-bin/carddisp.pl?gene=RNF217-AS1
LINC01498	Long Intergenic Non-Protein Coding RNA 1498	RNA Gene	13	GC12M108434	1.11836	https://www.genecards.org/cgi-bin/carddisp.pl?gene=LINC01498
LINC01208	Long Intergenic Non-Protein Coding RNA 1208	RNA Gene	13	GC03M176415	1.11836	https://www.genecards.org/cgi-bin/carddisp.pl?gene=LINC01208
LINC01250	Long Intergenic Non-Protein Coding RNA 1250	RNA Gene	13	GC02M002899	1.11836	https://www.genecards.org/cgi-bin/carddisp.pl?gene=LINC01250
JAKMIP2-AS1	JAKMIP2 Antisense RNA 1	RNA Gene	13	GC05P147560	1.11836	https://www.genecards.org/cgi-bin/carddisp.pl?gene=JAKMIP2-AS1
NEURL1-AS1	NEURL1 Antisense RNA 1	RNA Gene	13	GC10M103479	1.11836	https://www.genecards.org/cgi-bin/carddisp.pl?gene=NEURL1-AS1
RNF213-AS1	RNF213 Antisense RNA 1	RNA Gene	13	GC17M080335	1.11836	https://www.genecards.org/cgi-bin/carddisp.pl?gene=RNF213-AS1
CLYBL-AS1	CLYBL Antisense RNA 1	RNA Gene	13	GC13M099726	1.11836	https://www.genecards.org/cgi-bin/carddisp.pl?gene=CLYBL-AS1
CLYBL-AS2	CLYBL Antisense RNA 2	RNA Gene	13	GC13M099690	1.11836	https://www.genecards.org/cgi-bin/carddisp.pl?gene=CLYBL-AS2
LINC01422	Long Intergenic Non-Protein Coding RNA 1422	RNA Gene	13	GC22P026858	1.11836	https://www.genecards.org/cgi-bin/carddisp.pl?gene=LINC01422
LINC02085	Long Intergenic Non-Protein Coding RNA 2085	RNA Gene	13	GC03P101941	1.11836	https://www.genecards.org/cgi-bin/carddisp.pl?gene=LINC02085
LINC02363	Long Intergenic Non-Protein Coding RNA 2363	RNA Gene	13	GC04M184312	1.11836	https://www.genecards.org/cgi-bin/carddisp.pl?gene=LINC02363
LOC100288123	Uncharacterized LOC100288123	RNA Gene	13	GC19P001822	1.11836	https://www.genecards.org/cgi-bin/carddisp.pl?gene=LOC100288123
LINC01324	Long Intergenic Non-Protein Coding RNA 1324	RNA Gene	12	GC03M164664	1.11836	https://www.genecards.org/cgi-bin/carddisp.pl?gene=LINC01324
LINC01608	Long Intergenic Non-Protein Coding RNA 1608	RNA Gene	12	GC08M110899	1.11836	https://www.genecards.org/cgi-bin/carddisp.pl?gene=LINC01608
HSP90AA6P	Heat Shock Protein 90 Alpha Family Class A Member 6, Pseudogene	Pseudogene	12	GC04M170581	1.11836	https://www.genecards.org/cgi-bin/carddisp.pl?gene=HSP90AA6P
LINC00693	Long Intergenic Non-Protein Coding RNA 693	RNA Gene	12	GC03P028574	1.11836	https://www.genecards.org/cgi-bin/carddisp.pl?gene=LINC00693
TMED2-DT	TMED2 Divergent Transcript	RNA Gene	12	GC12M123582	1.11836	https://www.genecards.org/cgi-bin/carddisp.pl?gene=TMED2-DT
SNHG26	Small Nucleolar RNA Host Gene 26	RNA Gene	12	GC07P023020	1.11836	https://www.genecards.org/cgi-bin/carddisp.pl?gene=SNHG26
DTX2P1-UPK3BP1-PMS2P11	DTX2P1-UPK3BP1-PMS2P11 Readthrough, Transcribed Pseudogene	Pseudogene	12	GC07P076959	1.11836	https://www.genecards.org/cgi-bin/carddisp.pl?gene=DTX2P1-UPK3BP1-PMS2P11
DPP9-AS1	DPP9 Antisense RNA 1	RNA Gene	12	GC19P004681	1.11836	https://www.genecards.org/cgi-bin/carddisp.pl?gene=DPP9-AS1
LINP1	LncRNA In Non-Homologous End Joining Pathway 1	RNA Gene	12	GC10P006738	1.11836	https://www.genecards.org/cgi-bin/carddisp.pl?gene=LINP1
LINC01320	Long Intergenic Non-Protein Coding RNA 1320	RNA Gene	12	GC02P033711	1.11836	https://www.genecards.org/cgi-bin/carddisp.pl?gene=LINC01320
LINC01762	Long Intergenic Non-Protein Coding RNA 1762	RNA Gene	12	GC01M116424	1.11836	https://www.genecards.org/cgi-bin/carddisp.pl?gene=LINC01762
MIR2113	MicroRNA 2113	RNA Gene	12	GC06P098024	1.11836	https://www.genecards.org/cgi-bin/carddisp.pl?gene=MIR2113
PTOV1-AS2	PTOV1 Antisense RNA 2	RNA Gene	12	GC19M049856	1.11836	https://www.genecards.org/cgi-bin/carddisp.pl?gene=PTOV1-AS2
CYP4F24P	Cytochrome P450 Family 4 Subfamily F Member 24, Pseudogene	Pseudogene	12	GC19M015759	1.11836	https://www.genecards.org/cgi-bin/carddisp.pl?gene=CYP4F24P
LINC01228	Long Intergenic Non-Protein Coding RNA 1228	RNA Gene	11	GC16M079798	1.11836	https://www.genecards.org/cgi-bin/carddisp.pl?gene=LINC01228
LINC01700	Long Intergenic Non-Protein Coding RNA 1700	RNA Gene	11	GC21M038975	1.11836	https://www.genecards.org/cgi-bin/carddisp.pl?gene=LINC01700
LINC01950	Long Intergenic Non-Protein Coding RNA 1950	RNA Gene	11	GC05M106816	1.11836	https://www.genecards.org/cgi-bin/carddisp.pl?gene=LINC01950
LINC01973	Long Intergenic Non-Protein Coding RNA 1973	RNA Gene	11	GC17M077880	1.11836	https://www.genecards.org/cgi-bin/carddisp.pl?gene=LINC01973
LINC02882	Long Intergenic Non-Protein Coding RNA 2882	RNA Gene	11	GC12M073212	1.11836	https://www.genecards.org/cgi-bin/carddisp.pl?gene=LINC02882
LINC01304	Long Intergenic Non-Protein Coding RNA 1304	RNA Gene	11	GC02M003957	1.11836	https://www.genecards.org/cgi-bin/carddisp.pl?gene=LINC01304
LINC01428	Long Intergenic Non-Protein Coding RNA 1428	RNA Gene	11	GC20M007146	1.11836	https://www.genecards.org/cgi-bin/carddisp.pl?gene=LINC01428
MIR5702	MicroRNA 5702	RNA Gene	11	GC02M226658	1.11836	https://www.genecards.org/cgi-bin/carddisp.pl?gene=MIR5702
LINC02999	Long Intergenic Non-Protein Coding RNA 2999	RNA Gene	11	GC05M134431	1.11836	https://www.genecards.org/cgi-bin/carddisp.pl?gene=LINC02999
RFX3-DT	RFX3 Divergent Transcript	RNA Gene	11	GC09P003529	1.11836	https://www.genecards.org/cgi-bin/carddisp.pl?gene=RFX3-DT
LINC01855	Long Intergenic Non-Protein Coding RNA 1855	RNA Gene	10	GC19P053033	1.11836	https://www.genecards.org/cgi-bin/carddisp.pl?gene=LINC01855
LINC02006	Long Intergenic Non-Protein Coding RNA 2006	RNA Gene	10	GC03M153385	1.11836	https://www.genecards.org/cgi-bin/carddisp.pl?gene=LINC02006
FAUP1	FAU Pseudogene 1	Pseudogene	10	GC18M074389	1.11836	https://www.genecards.org/cgi-bin/carddisp.pl?gene=FAUP1
RPS10P11	Ribosomal Protein S10 Pseudogene 11	Pseudogene	10	GC05P134422	1.11836	https://www.genecards.org/cgi-bin/carddisp.pl?gene=RPS10P11
SRP54-AS1	SRP54 Antisense RNA 1	RNA Gene	10	GC14M034754	1.11836	https://www.genecards.org/cgi-bin/carddisp.pl?gene=SRP54-AS1
LINC02241	Long Intergenic Non-Protein Coding RNA 2241	RNA Gene	10	GC05P020613	1.11836	https://www.genecards.org/cgi-bin/carddisp.pl?gene=LINC02241
LINC02605	Long Intergenic Non-Protein Coding RNA 2605	RNA Gene	10	GC08P078838	1.11836	https://www.genecards.org/cgi-bin/carddisp.pl?gene=LINC02605
LINC02751	Long Intergenic Non-Protein Coding RNA 2751	RNA Gene	10	GC11P015563	1.11836	https://www.genecards.org/cgi-bin/carddisp.pl?gene=LINC02751
LINC01694	Long Intergenic Non-Protein Coding RNA 1694	RNA Gene	10	GC21P045591	1.11836	https://www.genecards.org/cgi-bin/carddisp.pl?gene=LINC01694
LINC01775	Long Intergenic Non-Protein Coding RNA 1775	RNA Gene	10	GC19M004467	1.11836	https://www.genecards.org/cgi-bin/carddisp.pl?gene=LINC01775
SKP1P2	S-Phase Kinase Associated Protein 1 Pseudogene 2	Pseudogene	10	GC12P016988	1.11836	https://www.genecards.org/cgi-bin/carddisp.pl?gene=SKP1P2
USP6NL-AS1	USP6NL Antisense RNA 1	RNA Gene	10	GC10P011614	1.11836	https://www.genecards.org/cgi-bin/carddisp.pl?gene=USP6NL-AS1
KRT18P14	Keratin 18 Pseudogene 14	Pseudogene	9	GC11M035842	1.11836	https://www.genecards.org/cgi-bin/carddisp.pl?gene=KRT18P14
LINC01987	Long Intergenic Non-Protein Coding RNA 1987	RNA Gene	9	GC17M077724	1.11836	https://www.genecards.org/cgi-bin/carddisp.pl?gene=LINC01987
FTH1P7	Ferritin Heavy Chain 1 Pseudogene 7	Pseudogene	9	GC13M022695	1.11836	https://www.genecards.org/cgi-bin/carddisp.pl?gene=FTH1P7
GTF2IRD1P1	GTF2I Repeat Domain Containing 1 Pseudogene 1	Pseudogene	9	GC07M066809	1.11836	https://www.genecards.org/cgi-bin/carddisp.pl?gene=GTF2IRD1P1
KBTBD11-AS1	KBTBD11 Antisense RNA 1	RNA Gene	9	GC08M001970	1.11836	https://www.genecards.org/cgi-bin/carddisp.pl?gene=KBTBD11-AS1
NRIP3-DT	NRIP3 Divergent Transcript	RNA Gene	9	GC11P009138	1.11836	https://www.genecards.org/cgi-bin/carddisp.pl?gene=NRIP3-DT
RPL17P34	Ribosomal Protein L17 Pseudogene 34	Pseudogene	9	GC10M093283	1.11836	https://www.genecards.org/cgi-bin/carddisp.pl?gene=RPL17P34
RNU6-456P	RNA, U6 Small Nuclear 456, Pseudogene	Pseudogene	9	GC05M134500	1.11836	https://www.genecards.org/cgi-bin/carddisp.pl?gene=RNU6-456P
RPL21P75	Ribosomal Protein L21 Pseudogene 75	Pseudogene	9	GC07P020002	1.11836	https://www.genecards.org/cgi-bin/carddisp.pl?gene=RPL21P75
SDHDP4	Succinate Dehydrogenase Complex Subunit D Pseudogene 4	Pseudogene	9	GC03M045882	1.11836	https://www.genecards.org/cgi-bin/carddisp.pl?gene=SDHDP4
SMIM14-DT	SMIM14 Divergent Transcript	RNA Gene	9	GC04P039644	1.11836	https://www.genecards.org/cgi-bin/carddisp.pl?gene=SMIM14-DT
CFAP100-DT	CFAP100 Divergent Transcript	RNA Gene	9	GC03M126378	1.11836	https://www.genecards.org/cgi-bin/carddisp.pl?gene=CFAP100-DT
LINC02239	Long Intergenic Non-Protein Coding RNA 2239	RNA Gene	9	GC05M024837	1.11836	https://www.genecards.org/cgi-bin/carddisp.pl?gene=LINC02239
LINC02214	Long Intergenic Non-Protein Coding RNA 2214	RNA Gene	9	GC05M116743	1.11836	https://www.genecards.org/cgi-bin/carddisp.pl?gene=LINC02214
MIR5007	MicroRNA 5007	RNA Gene	9	GC13P055174	1.11836	https://www.genecards.org/cgi-bin/carddisp.pl?gene=MIR5007
MIR4475	MicroRNA 4475	RNA Gene	9	GC09M036825	1.11836	https://www.genecards.org/cgi-bin/carddisp.pl?gene=MIR4475
ENSG00000254789	Novel Transcript	RNA Gene	9	GC11M015594	1.11836	https://www.genecards.org/cgi-bin/carddisp.pl?gene=ENSG00000254789
ENSG00000254919	Novel Transcript	RNA Gene	9	GC11M035721	1.11836	https://www.genecards.org/cgi-bin/carddisp.pl?gene=ENSG00000254919
UBE2L4	Ubiquitin Conjugating Enzyme E2 L4 (Pseudogene)	Pseudogene	9	GC19P010097	1.11836	https://www.genecards.org/cgi-bin/carddisp.pl?gene=UBE2L4
UNGP1	Uracil-DNA Glycosylase Pseudogene 1	Pseudogene	9	GC16P051280	1.11836	https://www.genecards.org/cgi-bin/carddisp.pl?gene=UNGP1
ENSG00000235888	Novel Transcript	RNA Gene	9	GC21M038988	1.11836	https://www.genecards.org/cgi-bin/carddisp.pl?gene=ENSG00000235888
ENSG00000255446	Novel Transcript	RNA Gene	9	GC11M084533	1.11836	https://www.genecards.org/cgi-bin/carddisp.pl?gene=ENSG00000255446
NXT1-AS1	NXT1 Antisense RNA 1	RNA Gene	8	GC20M023280	1.11836	https://www.genecards.org/cgi-bin/carddisp.pl?gene=NXT1-AS1
PAFAH1B2P2	PAFAH1B2 Pseudogene 2	Pseudogene	8	GC12M097717	1.11836	https://www.genecards.org/cgi-bin/carddisp.pl?gene=PAFAH1B2P2
RNU6-655P	RNA, U6 Small Nuclear 655, Pseudogene	Pseudogene	8	GC18P078036	1.11836	https://www.genecards.org/cgi-bin/carddisp.pl?gene=RNU6-655P
RNU6-369P	RNA, U6 Small Nuclear 369, Pseudogene	Pseudogene	8	GC01P044390	1.11836	https://www.genecards.org/cgi-bin/carddisp.pl?gene=RNU6-369P
RPL12P33	Ribosomal Protein L12 Pseudogene 33	Pseudogene	8	GC12P120916	1.11836	https://www.genecards.org/cgi-bin/carddisp.pl?gene=RPL12P33
RRM2P4	Ribonucleotide Reductase M2 Polypeptide Pseudogene 4	Pseudogene	8	GC0XP144309	1.11836	https://www.genecards.org/cgi-bin/carddisp.pl?gene=RRM2P4
RPL23AP12	Ribosomal Protein L23a Pseudogene 12	Pseudogene	8	GC21P039127	1.11836	https://www.genecards.org/cgi-bin/carddisp.pl?gene=RPL23AP12
SDK1-AS1	SDK1 Antisense RNA 1	RNA Gene	8	GC07M003276	1.11836	https://www.genecards.org/cgi-bin/carddisp.pl?gene=SDK1-AS1
CLEC4OP	C-Type Lectin Domain Family 4 Member O, Pseudogene	Pseudogene	8	GC19M015846	1.11836	https://www.genecards.org/cgi-bin/carddisp.pl?gene=CLEC4OP
CYCSP39	CYCS Pseudogene 39	Pseudogene	8	GC16M025455	1.11836	https://www.genecards.org/cgi-bin/carddisp.pl?gene=CYCSP39
LINC02382	Long Intergenic Non-Protein Coding RNA 2382	RNA Gene	8	GC04M170743	1.11836	https://www.genecards.org/cgi-bin/carddisp.pl?gene=LINC02382
LIX1-AS1	LIX1 And RIOK2 Antisense RNA 1	RNA Gene	8	GC05P097073	1.11836	https://www.genecards.org/cgi-bin/carddisp.pl?gene=LIX1-AS1
LINC01661	Long Intergenic Non-Protein Coding RNA 1661	RNA Gene	8	GC01P106820	1.11836	https://www.genecards.org/cgi-bin/carddisp.pl?gene=LINC01661
LINC01718	Long Intergenic Non-Protein Coding RNA 1718	RNA Gene	8	GC20P061080	1.11836	https://www.genecards.org/cgi-bin/carddisp.pl?gene=LINC01718
LINC01826	Long Intergenic Non-Protein Coding RNA 1826	RNA Gene	8	GC02M123068	1.11836	https://www.genecards.org/cgi-bin/carddisp.pl?gene=LINC01826
LINC02391	Long Intergenic Non-Protein Coding RNA 2391	RNA Gene	8	GC12M092248	1.11836	https://www.genecards.org/cgi-bin/carddisp.pl?gene=LINC02391
LINC02785	Long Intergenic Non-Protein Coding RNA 2785	RNA Gene	8	GC01P108040	1.11836	https://www.genecards.org/cgi-bin/carddisp.pl?gene=LINC02785
LINC01809	Long Intergenic Non-Protein Coding RNA 1809	RNA Gene	8	GC02P083523	1.11836	https://www.genecards.org/cgi-bin/carddisp.pl?gene=LINC01809
RNA5SP478	RNA, 5S Ribosomal Pseudogene 478	Pseudogene	8	GC20M023161	1.11836	https://www.genecards.org/cgi-bin/carddisp.pl?gene=RNA5SP478
RNU6-1211P	RNA, U6 Small Nuclear 1211, Pseudogene	Pseudogene	8	GC01P232700	1.11836	https://www.genecards.org/cgi-bin/carddisp.pl?gene=RNU6-1211P
RPL21P81	Ribosomal Protein L21 Pseudogene 81	Pseudogene	8	GC09P133338	1.11836	https://www.genecards.org/cgi-bin/carddisp.pl?gene=RPL21P81
PLD5P1	PLD5 Pseudogene 1	Pseudogene	8	GC10P038096	1.11836	https://www.genecards.org/cgi-bin/carddisp.pl?gene=PLD5P1
ENSG00000260613	Novel Transcript	RNA Gene	8	GC22M055208	1.11836	https://www.genecards.org/cgi-bin/carddisp.pl?gene=ENSG00000260613
ENSG00000267030	Novel Transcript, Antisense To UBXN6	RNA Gene	8	GC19P004447	1.11836	https://www.genecards.org/cgi-bin/carddisp.pl?gene=ENSG00000267030
ENSG00000267255	Novel Transcript, Antisense To CHAF1A	RNA Gene	8	GC19M004429	1.11836	https://www.genecards.org/cgi-bin/carddisp.pl?gene=ENSG00000267255
ENSG00000267273	Novel Transcript	RNA Gene	8	GC19P009498	1.11836	https://www.genecards.org/cgi-bin/carddisp.pl?gene=ENSG00000267273
ENSG00000268087	Novel Transcript	RNA Gene	8	GC19P050905	1.11836	https://www.genecards.org/cgi-bin/carddisp.pl?gene=ENSG00000268087
ENSG00000269938	Novel Transcript, Sense Intronic To CCDC92	RNA Gene	8	GC12M123968	1.11836	https://www.genecards.org/cgi-bin/carddisp.pl?gene=ENSG00000269938
ENSG00000269997	Novel Transcript, Sense Intronic To CCDC92	RNA Gene	8	GC12M123966	1.11836	https://www.genecards.org/cgi-bin/carddisp.pl?gene=ENSG00000269997
ENSG00000214650	Novel Transcript	RNA Gene	8	GC12P125579	1.11836	https://www.genecards.org/cgi-bin/carddisp.pl?gene=ENSG00000214650
ENSG00000250348	Novel Transcript	RNA Gene	8	GC05M076285	1.11836	https://www.genecards.org/cgi-bin/carddisp.pl?gene=ENSG00000250348
ENSG00000250994	Novel Transcript	RNA Gene	8	GC05P134436	1.11836	https://www.genecards.org/cgi-bin/carddisp.pl?gene=ENSG00000250994
ENSG00000251455	Novel Transcript, Antisense To PET112L	RNA Gene	8	GC04P151674	1.11836	https://www.genecards.org/cgi-bin/carddisp.pl?gene=ENSG00000251455
ENSG00000256306	Novel Transcript, Antisense To GRIN2B	RNA Gene	8	GC12P018826	1.11836	https://www.genecards.org/cgi-bin/carddisp.pl?gene=ENSG00000256306
ENSG00000260461	Novel Transcript, Overlapping To OBFC1	RNA Gene	8	GC10M103877	1.11836	https://www.genecards.org/cgi-bin/carddisp.pl?gene=ENSG00000260461
ENSG00000267159	Novel Transcript, Antisense To ARID3A	RNA Gene	8	GC19M004333	1.11836	https://www.genecards.org/cgi-bin/carddisp.pl?gene=ENSG00000267159
ENSG00000267510	Novel Transcript, Antisense To ZNF699	RNA Gene	8	GC19P009291	1.11836	https://www.genecards.org/cgi-bin/carddisp.pl?gene=ENSG00000267510
ENSG00000269807	Novel Transcript, Antisense To MPND	RNA Gene	8	GC19M004357	1.11836	https://www.genecards.org/cgi-bin/carddisp.pl?gene=ENSG00000269807
ENSG00000227186	Novel Transcript	RNA Gene	8	GC10M075023	1.11836	https://www.genecards.org/cgi-bin/carddisp.pl?gene=ENSG00000227186
ENSG00000235070	Novel Transcript	RNA Gene	8	GC02M225674	1.11836	https://www.genecards.org/cgi-bin/carddisp.pl?gene=ENSG00000235070
ENSG00000248559	Novel Transcript	RNA Gene	8	GC05P134399	1.11836	https://www.genecards.org/cgi-bin/carddisp.pl?gene=ENSG00000248559
ENSG00000255126	Novel Transcript	RNA Gene	8	GC11M084532	1.11836	https://www.genecards.org/cgi-bin/carddisp.pl?gene=ENSG00000255126
ENSG00000257452	Novel Transcript, Antisense To OAS1, OAS2 And OAS3	RNA Gene	8	GC12M112907	1.11836	https://www.genecards.org/cgi-bin/carddisp.pl?gene=ENSG00000257452
ENSG00000267317	Novel Transcript, Antisense To APC2	RNA Gene	8	GC19M004365	1.11836	https://www.genecards.org/cgi-bin/carddisp.pl?gene=ENSG00000267317
ENSG00000267607	Novel Transcript, Antisense To ICAM4 And ICAM1	RNA Gene	8	GC19M010285	1.11836	https://www.genecards.org/cgi-bin/carddisp.pl?gene=ENSG00000267607
ENSG00000268047	Novel Transcript, Antisense To PTOV1	RNA Gene	8	GC19M049852	1.11836	https://www.genecards.org/cgi-bin/carddisp.pl?gene=ENSG00000268047
ENSG00000269044	Novel Transcript, Sense Intronic C19orf42	RNA Gene	8	GC19M016633	1.11836	https://www.genecards.org/cgi-bin/carddisp.pl?gene=ENSG00000269044
ENSG00000269427	Novel Transcript, Antisense C19orf42	RNA Gene	8	GC19P050906	1.11836	https://www.genecards.org/cgi-bin/carddisp.pl?gene=ENSG00000269427
LOC101927066	Uncharacterized LOC101927066	RNA Gene	8	GC08M096951	1.11836	https://www.genecards.org/cgi-bin/carddisp.pl?gene=LOC101927066
ZBTB12BP	Zinc Finger And BTB Domain Containing 12B, Pseudogene	Pseudogene	8	GC04M039769	1.11836	https://www.genecards.org/cgi-bin/carddisp.pl?gene=ZBTB12BP
LOC101929165	Uncharacterized LOC101929165	RNA Gene	8	GC10P074912	1.11836	https://www.genecards.org/cgi-bin/carddisp.pl?gene=LOC101929165
ENSG00000235151	Novel Transcript	RNA Gene	8	GC02P241844	1.11836	https://www.genecards.org/cgi-bin/carddisp.pl?gene=ENSG00000235151
ENSG00000237609	Novel Transcript	RNA Gene	8	GC21M039028	1.11836	https://www.genecards.org/cgi-bin/carddisp.pl?gene=ENSG00000237609
ENSG00000251189	Novel Transcript	RNA Gene	8	GC05P038682	1.11836	https://www.genecards.org/cgi-bin/carddisp.pl?gene=ENSG00000251189
ENSG00000267904	Novel Transcript, Sense Intronic C19orf42	RNA Gene	8	GC19M016639	1.11836	https://www.genecards.org/cgi-bin/carddisp.pl?gene=ENSG00000267904
ENSG00000268189	Novel Transcript, Antisense To AKAP8 And AKAP8L	RNA Gene	8	GC19P015379	1.11836	https://www.genecards.org/cgi-bin/carddisp.pl?gene=ENSG00000268189
ENSG00000268670	Novel Transcript, Sense Intronic To ZBTB7A	RNA Gene	8	GC19M004580	1.11836	https://www.genecards.org/cgi-bin/carddisp.pl?gene=ENSG00000268670
ENSG00000269578	Novel Transcript, Sense Intronic MED26	RNA Gene	8	GC19M016587	1.11836	https://www.genecards.org/cgi-bin/carddisp.pl?gene=ENSG00000269578
ENSG00000270061	Novel Transcript, Sense Intronic To CCDC92	RNA Gene	8	GC12M123969	1.11836	https://www.genecards.org/cgi-bin/carddisp.pl?gene=ENSG00000270061
ENSG00000270130	Novel Transcript, Sense Intronic To CCDC92	RNA Gene	8	GC12M123960	1.11836	https://www.genecards.org/cgi-bin/carddisp.pl?gene=ENSG00000270130
KRT18P33	Keratin 18 Pseudogene 33	Pseudogene	7	GC02P065666	1.11836	https://www.genecards.org/cgi-bin/carddisp.pl?gene=KRT18P33
HSPA8P15	Heat Shock Protein Family A (Hsp70) Member 8 Pseudogene 15	Pseudogene	7	GC06M151411	1.11836	https://www.genecards.org/cgi-bin/carddisp.pl?gene=HSPA8P15
HNF4GP1	Hepatocyte Nuclear Factor 4 Gamma Pseudogene 1	Pseudogene	7	GC13M055996	1.11836	https://www.genecards.org/cgi-bin/carddisp.pl?gene=HNF4GP1
RPS27P22	Ribosomal Protein S27 Pseudogene 22	Pseudogene	7	GC12P022722	1.11836	https://www.genecards.org/cgi-bin/carddisp.pl?gene=RPS27P22
RNU6-1134P	RNA, U6 Small Nuclear 1134, Pseudogene	Pseudogene	7	GC17P031713	1.11836	https://www.genecards.org/cgi-bin/carddisp.pl?gene=RNU6-1134P
RPS27P10	Ribosomal Protein S27 Pseudogene 10	Pseudogene	7	GC02M211298	1.11836	https://www.genecards.org/cgi-bin/carddisp.pl?gene=RPS27P10
RSL24D1P5	Ribosomal L24 Domain Containing 1 Pseudogene 5	Pseudogene	7	GC12M063055	1.11836	https://www.genecards.org/cgi-bin/carddisp.pl?gene=RSL24D1P5
RPL37P4	Ribosomal Protein L37 Pseudogene 4	Pseudogene	7	GC21P019593	1.11836	https://www.genecards.org/cgi-bin/carddisp.pl?gene=RPL37P4
SNRPEP4	SNRPE Pseudogene 4	Pseudogene	7	GC19M005579	1.11836	https://www.genecards.org/cgi-bin/carddisp.pl?gene=SNRPEP4
SNRPGP6	Small Nuclear Ribonucleoprotein Polypeptide G Pseudogene 6	Pseudogene	7	GC10P116409	1.11836	https://www.genecards.org/cgi-bin/carddisp.pl?gene=SNRPGP6
MIR11181	MicroRNA 11181	RNA Gene	7	GC15M087949	1.11836	https://www.genecards.org/cgi-bin/carddisp.pl?gene=MIR11181
LINC02386	Long Intergenic Non-Protein Coding RNA 2386	RNA Gene	7	GC12M030178	1.11836	https://www.genecards.org/cgi-bin/carddisp.pl?gene=LINC02386
RAET1M	Retinoic Acid Early Transcript 1M Pseudogene	Pseudogene	7	GC06P150032	1.11836	https://www.genecards.org/cgi-bin/carddisp.pl?gene=RAET1M
RNU1-139P	RNA, U1 Small Nuclear 139, Pseudogene	Pseudogene	7	GC21P019345	1.11836	https://www.genecards.org/cgi-bin/carddisp.pl?gene=RNU1-139P
RNU1-74P	RNA, U1 Small Nuclear 74, Pseudogene	Pseudogene	7	GC01M232832	1.11836	https://www.genecards.org/cgi-bin/carddisp.pl?gene=RNU1-74P
RPL21P41	Ribosomal Protein L21 Pseudogene 41	Pseudogene	7	GC03P066638	1.11836	https://www.genecards.org/cgi-bin/carddisp.pl?gene=RPL21P41
RPL23P10	Ribosomal Protein L23 Pseudogene 10	Pseudogene	7	GC08M036581	1.11836	https://www.genecards.org/cgi-bin/carddisp.pl?gene=RPL23P10
RNU6ATAC11P	RNA, U6atac Small Nuclear 11, Pseudogene	Pseudogene	7	GC10P043341	1.11836	https://www.genecards.org/cgi-bin/carddisp.pl?gene=RNU6ATAC11P
ENSG00000267303	Novel Transcript	Protein Coding	7	GC19M010315	1.11836	https://www.genecards.org/cgi-bin/carddisp.pl?gene=ENSG00000267303
ENSG00000254964	Novel Transcript	RNA Gene	7	GC11P062606	1.11836	https://www.genecards.org/cgi-bin/carddisp.pl?gene=ENSG00000254964
ENSG00000268743	Novel Transcript, Sense Intronic SIN3B	RNA Gene	7	GC19P050909	1.11836	https://www.genecards.org/cgi-bin/carddisp.pl?gene=ENSG00000268743
ENSG00000234149	Novel Transcript	RNA Gene	7	GC10M075003	1.11836	https://www.genecards.org/cgi-bin/carddisp.pl?gene=ENSG00000234149
ENSG00000272040	Novel Transcript	RNA Gene	7	GC05P075608	1.11836	https://www.genecards.org/cgi-bin/carddisp.pl?gene=ENSG00000272040
UQCRC2P1	Ubiquinol-Cytochrome C Reductase Core Protein 2 Pseudogene 1	Pseudogene	7	GC03M046311	1.11836	https://www.genecards.org/cgi-bin/carddisp.pl?gene=UQCRC2P1
ENSG00000248624	Novel Transcript	RNA Gene	7	GC05P031657	1.11836	https://www.genecards.org/cgi-bin/carddisp.pl?gene=ENSG00000248624
ENSG00000255508	Novel Protein	Protein Coding	7	GC11M084543	1.11836	https://www.genecards.org/cgi-bin/carddisp.pl?gene=ENSG00000255508
ENSG00000266877	Novel Transcript	RNA Gene	7	GC17P031583	1.11836	https://www.genecards.org/cgi-bin/carddisp.pl?gene=ENSG00000266877
MYL12BP2	MYL12B Pseudogene 2	Pseudogene	6	GC04M184300	1.11836	https://www.genecards.org/cgi-bin/carddisp.pl?gene=MYL12BP2
GTF2IP23	General Transcription Factor IIi Pseudogene 23	Pseudogene	6	GC07P069534	1.11836	https://www.genecards.org/cgi-bin/carddisp.pl?gene=GTF2IP23
MRPS17P3	Mitochondrial Ribosomal Protein S17 Pseudogene 3	Pseudogene	6	GC03P078526	1.11836	https://www.genecards.org/cgi-bin/carddisp.pl?gene=MRPS17P3
RNU7-165P	RNA, U7 Small Nuclear 165 Pseudogene	Pseudogene	6	GC10P113353	1.11836	https://www.genecards.org/cgi-bin/carddisp.pl?gene=RNU7-165P
RNA5SP455	RNA, 5S Ribosomal Pseudogene 455	Pseudogene	6	GC18P044071	1.11836	https://www.genecards.org/cgi-bin/carddisp.pl?gene=RNA5SP455
RPL35AP15	Ribosomal Protein L35a Pseudogene 15	Pseudogene	6	GC05M117301	1.11836	https://www.genecards.org/cgi-bin/carddisp.pl?gene=RPL35AP15
RPL3P9	Ribosomal Protein L3 Pseudogene 9	Pseudogene	6	GC08M079571	1.11836	https://www.genecards.org/cgi-bin/carddisp.pl?gene=RPL3P9
RPS21P2	Ribosomal Protein S21 Pseudogene 2	Pseudogene	6	GC02M106292	1.11836	https://www.genecards.org/cgi-bin/carddisp.pl?gene=RPS21P2
RPS27P12	Ribosomal Protein S27 Pseudogene 12	Pseudogene	6	GC03M129984	1.11836	https://www.genecards.org/cgi-bin/carddisp.pl?gene=RPS27P12
RN7SKP228	RN7SK Pseudogene 228	Pseudogene	6	GC07P012918	1.11836	https://www.genecards.org/cgi-bin/carddisp.pl?gene=RN7SKP228
RN7SL167P	RNA, 7SL, Cytoplasmic 167, Pseudogene	Pseudogene	6	GC11M131004	1.11836	https://www.genecards.org/cgi-bin/carddisp.pl?gene=RN7SL167P
RNU6-525P	RNA, U6 Small Nuclear 525, Pseudogene	Pseudogene	6	GC05P180444	1.11836	https://www.genecards.org/cgi-bin/carddisp.pl?gene=RNU6-525P
RPL6P25	Ribosomal Protein L6 Pseudogene 25	Pseudogene	6	GC12P083151	1.11836	https://www.genecards.org/cgi-bin/carddisp.pl?gene=RPL6P25
TUBBP8	Tubulin Beta Class I Pseudogene 8	Pseudogene	6	GC15P029612	1.11836	https://www.genecards.org/cgi-bin/carddisp.pl?gene=TUBBP8
SNX33P1	Sorting Nexin 33 Pseudogene 1	Pseudogene	6	GC19M016034	1.11836	https://www.genecards.org/cgi-bin/carddisp.pl?gene=SNX33P1
SLC25A5P9	Solute Carrier Family 25 Member 5 Pseudogene 9	Pseudogene	6	GC05M075752	1.11836	https://www.genecards.org/cgi-bin/carddisp.pl?gene=SLC25A5P9
SRSF3P4	SRSF3 Pseudogene 4	Pseudogene	6	GC02M106255	1.11836	https://www.genecards.org/cgi-bin/carddisp.pl?gene=SRSF3P4
ARMC10P1	Armadillo Repeat Containing 10 Pseudogene 1	Pseudogene	6	GC03M094505	1.11836	https://www.genecards.org/cgi-bin/carddisp.pl?gene=ARMC10P1
DHFRP3	Dihydrofolate Reductase Pseudogene 3	Pseudogene	6	GC02P082856	1.11836	https://www.genecards.org/cgi-bin/carddisp.pl?gene=DHFRP3
BIN2P2	Bridging Integrator 2 Pseudogene 2	Pseudogene	6	GC05P075910	1.11836	https://www.genecards.org/cgi-bin/carddisp.pl?gene=BIN2P2
LINC02699	Long Intergenic Non-Protein Coding RNA 2699	RNA Gene	6	GC11P025613	1.11836	https://www.genecards.org/cgi-bin/carddisp.pl?gene=LINC02699
LINC02512	Long Intergenic Non-Protein Coding RNA 2512	RNA Gene	6	GC04P170344	1.11836	https://www.genecards.org/cgi-bin/carddisp.pl?gene=LINC02512
LINC02770	Long Intergenic Non-Protein Coding RNA 2770	RNA Gene	6	GC01P191875	1.11836	https://www.genecards.org/cgi-bin/carddisp.pl?gene=LINC02770
RNA5SP189	RNA, 5S Ribosomal Pseudogene 189	Pseudogene	6	GC05M105922	1.11836	https://www.genecards.org/cgi-bin/carddisp.pl?gene=RNA5SP189
RPL35P5	Ribosomal Protein L35 Pseudogene 5	Pseudogene	6	GC07M066606	1.11836	https://www.genecards.org/cgi-bin/carddisp.pl?gene=RPL35P5
PHB1P1	PHB1 Pseudogene 1	Pseudogene	6	GC06P150047	1.11836	https://www.genecards.org/cgi-bin/carddisp.pl?gene=PHB1P1
SERPINA7P1	Serpin Family A Member 7 Pseudogene 1	Pseudogene	6	GC0XM106562	1.11836	https://www.genecards.org/cgi-bin/carddisp.pl?gene=SERPINA7P1
ENSG00000287928	Novel Transcript, Antisense To GRIN2B	RNA Gene	6	GC12P013376	1.11836	https://www.genecards.org/cgi-bin/carddisp.pl?gene=ENSG00000287928
ENSG00000278330	Novel Transcript, Antisense To MBP	RNA Gene	6	GC18P077113	1.11836	https://www.genecards.org/cgi-bin/carddisp.pl?gene=ENSG00000278330
ENSG00000201451	Y RNA	RNA Gene	6	GC09M133339	1.11836	https://www.genecards.org/cgi-bin/carddisp.pl?gene=ENSG00000201451
ENSG00000235271	Novel Transcript	Uncategorized	6	GC22P026903	1.11836	https://www.genecards.org/cgi-bin/carddisp.pl?gene=ENSG00000235271
ENSG00000248234	Ribosomal Protein L27 (RPL27) Pseudogene	Pseudogene	6	GC05M038429	1.11836	https://www.genecards.org/cgi-bin/carddisp.pl?gene=ENSG00000248234
ENSG00000251844		RNA Gene	6	GC12M097552	1.11836	https://www.genecards.org/cgi-bin/carddisp.pl?gene=ENSG00000251844
ENSG00000267769	Novel Transcript, Antisense To UBX6	RNA Gene	6	GC19P004454	1.11836	https://www.genecards.org/cgi-bin/carddisp.pl?gene=ENSG00000267769
ENSG00000272836	Novel Transcript, Antisense To SELO	RNA Gene	6	GC22M050205	1.11836	https://www.genecards.org/cgi-bin/carddisp.pl?gene=ENSG00000272836
ENSG00000273192	Novel Transcript, Antisense To ALG12	RNA Gene	6	GC22P049903	1.11836	https://www.genecards.org/cgi-bin/carddisp.pl?gene=ENSG00000273192
ENSG00000224272	Novel Transcript	RNA Gene	6	GC02M241808	1.11836	https://www.genecards.org/cgi-bin/carddisp.pl?gene=ENSG00000224272
ENSG00000260648	Novel Transcript, Sense Intronic To PAK6	RNA Gene	6	GC15P040232	1.11836	https://www.genecards.org/cgi-bin/carddisp.pl?gene=ENSG00000260648
ENSG00000261526	Novel Transcript	RNA Gene	6	GC19M001874	1.11836	https://www.genecards.org/cgi-bin/carddisp.pl?gene=ENSG00000261526
ENSG00000283563	Novel Protein	Protein Coding	6	GC03P028349	1.11836	https://www.genecards.org/cgi-bin/carddisp.pl?gene=ENSG00000283563
lnc-COPG1-3		RNA Gene	6	GC03P133512	1.11836	https://www.genecards.org/cgi-bin/carddisp.pl?gene=lnc-COPG1-3
KSR1P1	Kinase Suppressor Of Ras 1 Pseudogene 1	Pseudogene	5	GC10M042149	1.11836	https://www.genecards.org/cgi-bin/carddisp.pl?gene=KSR1P1
NAP1L4P2	Nucleosome Assembly Protein 1 Like 4 Pseudogene 2	Pseudogene	5	GC0XM106466	1.11836	https://www.genecards.org/cgi-bin/carddisp.pl?gene=NAP1L4P2
NSA2P4	NSA2 Pseudogene 4	Pseudogene	5	GC15M080009	1.11836	https://www.genecards.org/cgi-bin/carddisp.pl?gene=NSA2P4
HNRNPCP10	Heterogeneous Nuclear Ribonucleoprotein C Pseudogene 10	Pseudogene	5	GC0XP144840	1.11836	https://www.genecards.org/cgi-bin/carddisp.pl?gene=HNRNPCP10
HNRNPH1P2	Heterogeneous Nuclear Ribonucleoprotein H1 Pseudogene 2	Pseudogene	5	GC0XM143677	1.11836	https://www.genecards.org/cgi-bin/carddisp.pl?gene=HNRNPH1P2
MTND3P4	MT-ND3 Pseudogene 4	Pseudogene	5	GC09M101793	1.11836	https://www.genecards.org/cgi-bin/carddisp.pl?gene=MTND3P4
NDUFB9P3	NADH:Ubiquinone Oxidoreductase Subunit B9 Pseudogene 3	Pseudogene	5	GC08M110810	1.11836	https://www.genecards.org/cgi-bin/carddisp.pl?gene=NDUFB9P3
GNAI2P2	G Protein Subunit Alpha I2 Pseudogene 2	Pseudogene	5	GC10M078068	1.11836	https://www.genecards.org/cgi-bin/carddisp.pl?gene=GNAI2P2
RN7SL300P	RNA, 7SL, Cytoplasmic 300, Pseudogene	Pseudogene	5	GC03M153199	1.11836	https://www.genecards.org/cgi-bin/carddisp.pl?gene=RN7SL300P
RNU6-1328P	RNA, U6 Small Nuclear 1328, Pseudogene	Pseudogene	5	GC07P094495	1.11836	https://www.genecards.org/cgi-bin/carddisp.pl?gene=RNU6-1328P
RNU6-533P	RNA, U6 Small Nuclear 533, Pseudogene	Pseudogene	5	GC08M036309	1.11836	https://www.genecards.org/cgi-bin/carddisp.pl?gene=RNU6-533P
RNU6-995P	RNA, U6 Small Nuclear 995, Pseudogene	Pseudogene	5	GC0XP080936	1.11836	https://www.genecards.org/cgi-bin/carddisp.pl?gene=RNU6-995P
RFPL4AP3	Ret Finger Protein Like 4A Pseudogene 3	Pseudogene	5	GC04M023517	1.11836	https://www.genecards.org/cgi-bin/carddisp.pl?gene=RFPL4AP3
SEPTIN7P1	Septin 7 Pseudogene 1	Pseudogene	5	GC14M035202	1.11836	https://www.genecards.org/cgi-bin/carddisp.pl?gene=SEPTIN7P1
SAPCD2P3	Suppressor APC Domain Containing 2 Pseudogene 3	Pseudogene	5	GC07P066556	1.11836	https://www.genecards.org/cgi-bin/carddisp.pl?gene=SAPCD2P3
ARL2BPP7	ADP Ribosylation Factor Like GTPase 2 Binding Protein Pseudogene 7	Pseudogene	5	GC09M102053	1.11836	https://www.genecards.org/cgi-bin/carddisp.pl?gene=ARL2BPP7
EI24P1	EI24 Pseudogene 1	Pseudogene	5	GC03M176068	1.11836	https://www.genecards.org/cgi-bin/carddisp.pl?gene=EI24P1
EIF4A3P1	Eukaryotic Translation Initiation Factor 4A3 Pseudogene 1	Pseudogene	5	GC18M024522	1.11836	https://www.genecards.org/cgi-bin/carddisp.pl?gene=EIF4A3P1
CHEK2P5	CHEK2 Pseudogene 5	Pseudogene	5	GC10P039158	1.11836	https://www.genecards.org/cgi-bin/carddisp.pl?gene=CHEK2P5
RNU6ATAC13P	RNA, U6atac Small Nuclear 13, Pseudogene	Pseudogene	5	GC04P170891	1.11836	https://www.genecards.org/cgi-bin/carddisp.pl?gene=RNU6ATAC13P
NONHSAG025023.2-001		RNA Gene	5	GC19P053500	1.11836	https://www.genecards.org/cgi-bin/carddisp.pl?gene=NONHSAG025023.2-001
hsa-miR-5096-072		RNA Gene	5	GC07P002872	1.11836	https://www.genecards.org/cgi-bin/carddisp.pl?gene=hsa-miR-5096-072
lnc-ABO-33		RNA Gene	5	GC09M133232	1.11836	https://www.genecards.org/cgi-bin/carddisp.pl?gene=lnc-ABO-33
lnc-CAMKK2-1		RNA Gene	5	GC12M122056	1.11836	https://www.genecards.org/cgi-bin/carddisp.pl?gene=lnc-CAMKK2-1
ENSG00000288720	Novel Transcript	RNA Gene	5	GC03P045795	1.11836	https://www.genecards.org/cgi-bin/carddisp.pl?gene=ENSG00000288720
ENSG00000272249	Novel Transcript, Antisense To CPQ	RNA Gene	5	GC08M097132	1.11836	https://www.genecards.org/cgi-bin/carddisp.pl?gene=ENSG00000272249
ENSG00000277935	Novel Transcript	RNA Gene	5	GC12P013540	1.11836	https://www.genecards.org/cgi-bin/carddisp.pl?gene=ENSG00000277935
ENSG00000286703	Novel Transcript	RNA Gene	5	GC07P022822	1.11836	https://www.genecards.org/cgi-bin/carddisp.pl?gene=ENSG00000286703
ENSG00000255093	Novel Pseudogene	Pseudogene	5	GC11P111448	1.11836	https://www.genecards.org/cgi-bin/carddisp.pl?gene=ENSG00000255093
ENSG00000272849	Novel Transcript	RNA Gene	5	GC12P125521	1.11836	https://www.genecards.org/cgi-bin/carddisp.pl?gene=ENSG00000272849
ENSG00000273137	Novel Transcript, Antisense To SELO	RNA Gene	5	GC22M050208	1.11836	https://www.genecards.org/cgi-bin/carddisp.pl?gene=ENSG00000273137
ENSG00000273450	Novel Transcript, Antisense To PLCE1	RNA Gene	5	GC10M094314	1.11836	https://www.genecards.org/cgi-bin/carddisp.pl?gene=ENSG00000273450
ENSG00000286774	Novel Transcript	RNA Gene	5	GC01P232844	1.11836	https://www.genecards.org/cgi-bin/carddisp.pl?gene=ENSG00000286774
ENSG00000287357	Novel Transcript	RNA Gene	5	GC13M022589	1.11836	https://www.genecards.org/cgi-bin/carddisp.pl?gene=ENSG00000287357
ENSG00000258790	Novel Transcript	Protein Coding	5	GC14P035122	1.11836	https://www.genecards.org/cgi-bin/carddisp.pl?gene=ENSG00000258790
ENSG00000275178	Novel Transcript, Antisense To MBP	RNA Gene	5	GC18P077093	1.11836	https://www.genecards.org/cgi-bin/carddisp.pl?gene=ENSG00000275178
VWA8P1	Von Willebrand Factor A Domain Containing 8 Pseudogene 1	Pseudogene	5	GC05M068854	1.11836	https://www.genecards.org/cgi-bin/carddisp.pl?gene=VWA8P1
lnc-SCARB1-5		RNA Gene	5	GC12M124511	1.11836	https://www.genecards.org/cgi-bin/carddisp.pl?gene=lnc-SCARB1-5
lnc-TULP2-3		RNA Gene	5	GC19M062166	1.11836	https://www.genecards.org/cgi-bin/carddisp.pl?gene=lnc-TULP2-3
hsa-miR-5096-021		RNA Gene	5	GC05P031655	1.11836	https://www.genecards.org/cgi-bin/carddisp.pl?gene=hsa-miR-5096-021
lnc-BTG4-3		RNA Gene	5	GC11M111354	1.11836	https://www.genecards.org/cgi-bin/carddisp.pl?gene=lnc-BTG4-3
lnc-WDR18-2		RNA Gene	5	GC19P002180	1.11836	https://www.genecards.org/cgi-bin/carddisp.pl?gene=lnc-WDR18-2
lnc-MBP-13		RNA Gene	5	GC18M076979	1.11836	https://www.genecards.org/cgi-bin/carddisp.pl?gene=lnc-MBP-13
lnc-SOX6-6		RNA Gene	5	GC11M015528	1.11836	https://www.genecards.org/cgi-bin/carddisp.pl?gene=lnc-SOX6-6
lnc-STOX2-10		RNA Gene	5	GC04P184331	1.11836	https://www.genecards.org/cgi-bin/carddisp.pl?gene=lnc-STOX2-10
lnc-TUBGCP6-1		RNA Gene	5	GC22M055227	1.11836	https://www.genecards.org/cgi-bin/carddisp.pl?gene=lnc-TUBGCP6-1
lnc-MYH13-3		RNA Gene	5	GC17M010130	1.11836	https://www.genecards.org/cgi-bin/carddisp.pl?gene=lnc-MYH13-3
HSALNG0093344		RNA Gene	5	GC12M097493	1.11836	https://www.genecards.org/cgi-bin/carddisp.pl?gene=HSALNG0093344
lnc-IRS1-1		RNA Gene	5	GC02M226222	1.11836	https://www.genecards.org/cgi-bin/carddisp.pl?gene=lnc-IRS1-1
ENSG00000250568	Poly(A) Binding Protein, Cytoplasmic 1 (PABPC1) Pseudogene	Pseudogene	5	GC04M039974	1.11836	https://www.genecards.org/cgi-bin/carddisp.pl?gene=ENSG00000250568
ENSG00000275162	Novel Transcript, Sense Intronic To ARID3A	RNA Gene	5	GC19P000956	1.11836	https://www.genecards.org/cgi-bin/carddisp.pl?gene=ENSG00000275162
lnc-COPRS-1		RNA Gene	5	GC17M031587	1.11836	https://www.genecards.org/cgi-bin/carddisp.pl?gene=lnc-COPRS-1
lnc-COPG1-2		RNA Gene	5	GC03P133511	1.11836	https://www.genecards.org/cgi-bin/carddisp.pl?gene=lnc-COPG1-2
RF00017-4516		RNA Gene	5	GC05M134442	1.11836	https://www.genecards.org/cgi-bin/carddisp.pl?gene=RF00017-4516
ELOAP1	ELOA Pseudogene 1	Pseudogene	4	GC02P123698	1.11836	https://www.genecards.org/cgi-bin/carddisp.pl?gene=ELOAP1
H2ACP1	H2AC Histone Family Pseudogene 1	Pseudogene	4	GC13M036519	1.11836	https://www.genecards.org/cgi-bin/carddisp.pl?gene=H2ACP1
ACER2P1	ACER2 Pseudogene 1	Pseudogene	4	GC02M206411	1.11836	https://www.genecards.org/cgi-bin/carddisp.pl?gene=ACER2P1
MTCYBP19	MT-CYB Pseudogene 19	Pseudogene	4	GC08M036370	1.11836	https://www.genecards.org/cgi-bin/carddisp.pl?gene=MTCYBP19
MTCYBP36	MT-CYB Pseudogene 36	Pseudogene	4	GC06M094501	1.11836	https://www.genecards.org/cgi-bin/carddisp.pl?gene=MTCYBP36
RNU7-37P	RNA, U7 Small Nuclear 37 Pseudogene	Pseudogene	4	GC0XP053131	1.11836	https://www.genecards.org/cgi-bin/carddisp.pl?gene=RNU7-37P
ANAPC15P2	ANAPC15 Pseudogene 2	Pseudogene	4	GC03M174305	1.11836	https://www.genecards.org/cgi-bin/carddisp.pl?gene=ANAPC15P2
PPP1R2P8	Protein Phosphatase 1 Regulatory Inhibitor Subunit 2 Pseudogene 8	Pseudogene	4	GC05P020997	1.11836	https://www.genecards.org/cgi-bin/carddisp.pl?gene=PPP1R2P8
LOC105370047	Uncharacterized LOC105370047	RNA Gene	4	GC12P125578	1.11836	https://www.genecards.org/cgi-bin/carddisp.pl?gene=LOC105370047
piR-51043		RNA Gene	4	GC09M136053	1.11836	https://www.genecards.org/cgi-bin/carddisp.pl?gene=piR-51043
piR-32559-090		RNA Gene	4	GC12P062759	1.11836	https://www.genecards.org/cgi-bin/carddisp.pl?gene=piR-32559-090
piR-32559-282		RNA Gene	4	GC03M046251	1.11836	https://www.genecards.org/cgi-bin/carddisp.pl?gene=piR-32559-282
piR-36887-008		RNA Gene	4	GC11P062454	1.11836	https://www.genecards.org/cgi-bin/carddisp.pl?gene=piR-36887-008
piR-48499		RNA Gene	4	GC08P002005	1.11836	https://www.genecards.org/cgi-bin/carddisp.pl?gene=piR-48499
piR-32285-064		RNA Gene	4	GC03M129987	1.11836	https://www.genecards.org/cgi-bin/carddisp.pl?gene=piR-32285-064
piR-36746-014		RNA Gene	4	GC02P226280	1.11836	https://www.genecards.org/cgi-bin/carddisp.pl?gene=piR-36746-014
NONHSAG024308.2		RNA Gene	4	GC19P002143	1.11836	https://www.genecards.org/cgi-bin/carddisp.pl?gene=NONHSAG024308.2
NONHSAG053687.2		RNA Gene	4	GC09P133963	1.11836	https://www.genecards.org/cgi-bin/carddisp.pl?gene=NONHSAG053687.2
NONHSAG050827.2		RNA Gene	4	GC08P097066	1.11836	https://www.genecards.org/cgi-bin/carddisp.pl?gene=NONHSAG050827.2
HSALNG0091866		RNA Gene	4	GC12P062788	1.11836	https://www.genecards.org/cgi-bin/carddisp.pl?gene=HSALNG0091866
HSALNG0094814		RNA Gene	4	GC12M124512	1.11836	https://www.genecards.org/cgi-bin/carddisp.pl?gene=HSALNG0094814
HSALNG0123410		RNA Gene	4	GC19M004677	1.11836	https://www.genecards.org/cgi-bin/carddisp.pl?gene=HSALNG0123410
HSALNG0123412		RNA Gene	4	GC19P004916	1.11836	https://www.genecards.org/cgi-bin/carddisp.pl?gene=HSALNG0123412
lnc-DUSP13-1		RNA Gene	4	GC10M075049	1.11836	https://www.genecards.org/cgi-bin/carddisp.pl?gene=lnc-DUSP13-1
ENSG00000279527	Novel Transcript	Uncategorized	4	GC12M124529	1.11836	https://www.genecards.org/cgi-bin/carddisp.pl?gene=ENSG00000279527
HSALNG0055755		RNA Gene	4	GC07M002845	1.11836	https://www.genecards.org/cgi-bin/carddisp.pl?gene=HSALNG0055755
HSALNG0026812		RNA Gene	4	GC03P072371	1.11836	https://www.genecards.org/cgi-bin/carddisp.pl?gene=HSALNG0026812
lnc-ARMT1-2		RNA Gene	4	GC06P151449	1.11836	https://www.genecards.org/cgi-bin/carddisp.pl?gene=lnc-ARMT1-2
HSALNG0039004		RNA Gene	4	GC04M184318	1.11836	https://www.genecards.org/cgi-bin/carddisp.pl?gene=HSALNG0039004
HSALNG0087098		RNA Gene	4	GC11P111354	1.11836	https://www.genecards.org/cgi-bin/carddisp.pl?gene=HSALNG0087098
HSALNG0055761		RNA Gene	4	GC07P002864	1.11836	https://www.genecards.org/cgi-bin/carddisp.pl?gene=HSALNG0055761
HSALNG0080369		RNA Gene	4	GC10P103480	1.11836	https://www.genecards.org/cgi-bin/carddisp.pl?gene=HSALNG0080369
HSALNG0042408		RNA Gene	4	GC05P068318	1.11836	https://www.genecards.org/cgi-bin/carddisp.pl?gene=HSALNG0042408
HSALNG0025678		RNA Gene	4	GC03M046270	1.11836	https://www.genecards.org/cgi-bin/carddisp.pl?gene=HSALNG0025678
HSALNG0042757		RNA Gene	4	GC05M075704	1.11836	https://www.genecards.org/cgi-bin/carddisp.pl?gene=HSALNG0042757
HSALNG0075212		RNA Gene	4	GC09P136037	1.11836	https://www.genecards.org/cgi-bin/carddisp.pl?gene=HSALNG0075212
LOC107985485	Uncharacterized LOC107985485	RNA Gene	4	GC21M050255	1.11836	https://www.genecards.org/cgi-bin/carddisp.pl?gene=LOC107985485
ENSG00000288724	Novel Transcript	RNA Gene	4	GC03M046284	1.11836	https://www.genecards.org/cgi-bin/carddisp.pl?gene=ENSG00000288724
ENSG00000286082	Novel Transcript	RNA Gene	4	GC21M050160	1.11836	https://www.genecards.org/cgi-bin/carddisp.pl?gene=ENSG00000286082
ENSG00000288871	Novel Transcript, Antisense To TUBGCP6and HDAC10	RNA Gene	4	GC22P050244	1.11836	https://www.genecards.org/cgi-bin/carddisp.pl?gene=ENSG00000288871
ENSG00000279198	TEC	Uncategorized	4	GC19M016074	1.11836	https://www.genecards.org/cgi-bin/carddisp.pl?gene=ENSG00000279198
ENSG00000249943	Myeloid Cell Leukemia Sequence 1 (BCL2-Related) (MCL1) Pseudogene	Pseudogene	4	GC04M170814	1.11836	https://www.genecards.org/cgi-bin/carddisp.pl?gene=ENSG00000249943
ENSG00000250350	Epidermis-Specific Serine Protease-Like Protein (ESSPL) Pseudogene	Pseudogene	4	GC04M151279	1.11836	https://www.genecards.org/cgi-bin/carddisp.pl?gene=ENSG00000250350
ENSG00000285731	Novel Transcript, Antisense To TBC1D5	RNA Gene	4	GC03P017141	1.11836	https://www.genecards.org/cgi-bin/carddisp.pl?gene=ENSG00000285731
ENSG00000286594	Novel Transcript	RNA Gene	4	GC21P045607	1.11836	https://www.genecards.org/cgi-bin/carddisp.pl?gene=ENSG00000286594
LOC107986450	Uncharacterized LOC107986450	RNA Gene	4	GC05P134443	1.11836	https://www.genecards.org/cgi-bin/carddisp.pl?gene=LOC107986450
LOC105374101	Uncharacterized LOC105374101	RNA Gene	4	GC03P133381	1.11836	https://www.genecards.org/cgi-bin/carddisp.pl?gene=LOC105374101
LOC105376568	Uncharacterized LOC105376568	RNA Gene	4	GC11M015571	1.11836	https://www.genecards.org/cgi-bin/carddisp.pl?gene=LOC105376568
lnc-LDLRAD3-1		RNA Gene	4	GC11P035891	1.11836	https://www.genecards.org/cgi-bin/carddisp.pl?gene=lnc-LDLRAD3-1
lnc-MRPL46-8		RNA Gene	4	GC15M087875	1.11836	https://www.genecards.org/cgi-bin/carddisp.pl?gene=lnc-MRPL46-8
lnc-NAALADL2-9		RNA Gene	4	GC03P176306	1.11836	https://www.genecards.org/cgi-bin/carddisp.pl?gene=lnc-NAALADL2-9
lnc-NCOR2-4		RNA Gene	4	GC12M124486	1.11836	https://www.genecards.org/cgi-bin/carddisp.pl?gene=lnc-NCOR2-4
lnc-PRSS48-2		RNA Gene	4	GC04P151316	1.11836	https://www.genecards.org/cgi-bin/carddisp.pl?gene=lnc-PRSS48-2
lnc-SCARB1-4		RNA Gene	4	GC12M124524	1.11836	https://www.genecards.org/cgi-bin/carddisp.pl?gene=lnc-SCARB1-4
lnc-UPK3B-2		RNA Gene	4	GC07P076683	1.11836	https://www.genecards.org/cgi-bin/carddisp.pl?gene=lnc-UPK3B-2
HSALNG0123921		RNA Gene	4	GC19M010288	1.11836	https://www.genecards.org/cgi-bin/carddisp.pl?gene=HSALNG0123921
HSALNG0124416		RNA Gene	4	GC19M016071	1.11836	https://www.genecards.org/cgi-bin/carddisp.pl?gene=HSALNG0124416
HSALNG0126918		RNA Gene	4	GC19P052257	1.11836	https://www.genecards.org/cgi-bin/carddisp.pl?gene=HSALNG0126918
NONHSAG006253.2		RNA Gene	4	GC10P074862	1.11836	https://www.genecards.org/cgi-bin/carddisp.pl?gene=NONHSAG006253.2
lnc-LDHAL6B-3		RNA Gene	4	GC15P059387	1.11836	https://www.genecards.org/cgi-bin/carddisp.pl?gene=lnc-LDHAL6B-3
lnc-LZTFL1-3		RNA Gene	4	GC03M045790	1.11836	https://www.genecards.org/cgi-bin/carddisp.pl?gene=lnc-LZTFL1-3
lnc-SLC35G1-1		RNA Gene	4	GC10P093988	1.11836	https://www.genecards.org/cgi-bin/carddisp.pl?gene=lnc-SLC35G1-1
lnc-STK26-6		RNA Gene	4	GC0XP132046	1.11836	https://www.genecards.org/cgi-bin/carddisp.pl?gene=lnc-STK26-6
lnc-TBL1XR1-6		RNA Gene	4	GC03M176287	1.11836	https://www.genecards.org/cgi-bin/carddisp.pl?gene=lnc-TBL1XR1-6
MK280269-046		RNA Gene	4	GC04M151359	1.11836	https://www.genecards.org/cgi-bin/carddisp.pl?gene=MK280269-046
lnc-MYDGF-2		RNA Gene	4	GC19M004714	1.11836	https://www.genecards.org/cgi-bin/carddisp.pl?gene=lnc-MYDGF-2
lnc-PDE4A-3		RNA Gene	4	GC19P010380	1.11836	https://www.genecards.org/cgi-bin/carddisp.pl?gene=lnc-PDE4A-3
lnc-NEU4-1		RNA Gene	4	GC02P241822	1.11836	https://www.genecards.org/cgi-bin/carddisp.pl?gene=lnc-NEU4-1
MN298114-203		RNA Gene	4	GC07P003036	1.11836	https://www.genecards.org/cgi-bin/carddisp.pl?gene=MN298114-203
lnc-PPP2R3C-2		RNA Gene	4	GC14M035203	1.11836	https://www.genecards.org/cgi-bin/carddisp.pl?gene=lnc-PPP2R3C-2
lnc-SETD1B-4		RNA Gene	4	GC12P125669	1.11836	https://www.genecards.org/cgi-bin/carddisp.pl?gene=lnc-SETD1B-4
lnc-IL6-7		RNA Gene	4	GC07P023007	1.11836	https://www.genecards.org/cgi-bin/carddisp.pl?gene=lnc-IL6-7
lnc-IQGAP2-1		RNA Gene	4	GC05P076333	1.11836	https://www.genecards.org/cgi-bin/carddisp.pl?gene=lnc-IQGAP2-1
lnc-ICAM3-1		RNA Gene	4	GC19M010386	1.11836	https://www.genecards.org/cgi-bin/carddisp.pl?gene=lnc-ICAM3-1
LOC110091768	Uncharacterized LOC110091768	RNA Gene	4	GC22P033617	1.11836	https://www.genecards.org/cgi-bin/carddisp.pl?gene=LOC110091768
ENSG00000267370	Zinc Finger Protein 420 (ZNF420) Pseudogene	Pseudogene	4	GC19M009839	1.11836	https://www.genecards.org/cgi-bin/carddisp.pl?gene=ENSG00000267370
ENSG00000285810	Novel Transcript, Antisense To DUPD1	RNA Gene	4	GC10P075041	1.11836	https://www.genecards.org/cgi-bin/carddisp.pl?gene=ENSG00000285810
HSALNG0106290		RNA Gene	4	GC15M079746	1.11836	https://www.genecards.org/cgi-bin/carddisp.pl?gene=HSALNG0106290
HSALNG0109339		RNA Gene	4	GC16M006461	1.11836	https://www.genecards.org/cgi-bin/carddisp.pl?gene=HSALNG0109339
HSALNG0124417-001		RNA Gene	4	GC19M016077	1.11836	https://www.genecards.org/cgi-bin/carddisp.pl?gene=HSALNG0124417-001
lnc-AMZ1-4		RNA Gene	4	GC07P002880	1.11836	https://www.genecards.org/cgi-bin/carddisp.pl?gene=lnc-AMZ1-4
lnc-BET1-4		RNA Gene	4	GC07M094586	1.11836	https://www.genecards.org/cgi-bin/carddisp.pl?gene=lnc-BET1-4
HSALNG0122951		RNA Gene	4	GC19P000949	1.11836	https://www.genecards.org/cgi-bin/carddisp.pl?gene=HSALNG0122951
HSALNG0140178		RNA Gene	4	GC0XP132024	1.11836	https://www.genecards.org/cgi-bin/carddisp.pl?gene=HSALNG0140178
lnc-AADAT-11		RNA Gene	4	GC04M170815	1.11836	https://www.genecards.org/cgi-bin/carddisp.pl?gene=lnc-AADAT-11
lnc-CDC37-1		RNA Gene	4	GC19M010368	1.11836	https://www.genecards.org/cgi-bin/carddisp.pl?gene=lnc-CDC37-1
lnc-FAM126A-2		RNA Gene	4	GC07M022812	1.11836	https://www.genecards.org/cgi-bin/carddisp.pl?gene=lnc-FAM126A-2
piR-58075		RNA Gene	4	GC11P015600	1.11836	https://www.genecards.org/cgi-bin/carddisp.pl?gene=piR-58075
RF00017-2813		RNA Gene	4	GC19P052255	1.11836	https://www.genecards.org/cgi-bin/carddisp.pl?gene=RF00017-2813
RF00017-5575		RNA Gene	4	GC07M002857	1.11836	https://www.genecards.org/cgi-bin/carddisp.pl?gene=RF00017-5575
RF00017-4180		RNA Gene	4	GC05P031571	1.11836	https://www.genecards.org/cgi-bin/carddisp.pl?gene=RF00017-4180
RF00017-4183		RNA Gene	4	GC05M031660	1.11836	https://www.genecards.org/cgi-bin/carddisp.pl?gene=RF00017-4183
RF00994-136		RNA Gene	4	GC10M071993	1.11836	https://www.genecards.org/cgi-bin/carddisp.pl?gene=RF00994-136
SNODB276		RNA Gene	4	GC15P059391	1.11836	https://www.genecards.org/cgi-bin/carddisp.pl?gene=SNODB276
RF00017-2500		RNA Gene	4	GC19M004662	1.11836	https://www.genecards.org/cgi-bin/carddisp.pl?gene=RF00017-2500
RF00017-7611		RNA Gene	4	GC09P134099	1.11836	https://www.genecards.org/cgi-bin/carddisp.pl?gene=RF00017-7611
piR-54764-266		RNA Gene	4	GC17M010178	1.11836	https://www.genecards.org/cgi-bin/carddisp.pl?gene=piR-54764-266
RF00017-4103		RNA Gene	4	GC04P184342	1.11836	https://www.genecards.org/cgi-bin/carddisp.pl?gene=RF00017-4103
RF00017-4517		RNA Gene	4	GC05M134487	1.11836	https://www.genecards.org/cgi-bin/carddisp.pl?gene=RF00017-4517
piR-59050		RNA Gene	4	GC03M072377	1.11836	https://www.genecards.org/cgi-bin/carddisp.pl?gene=piR-59050
piR-59907-030		RNA Gene	4	GC09M133272	1.11836	https://www.genecards.org/cgi-bin/carddisp.pl?gene=piR-59907-030
RF00017-2494		RNA Gene	4	GC19M004658	1.11836	https://www.genecards.org/cgi-bin/carddisp.pl?gene=RF00017-2494
RF00017-5974		RNA Gene	4	GC07P075681	1.11836	https://www.genecards.org/cgi-bin/carddisp.pl?gene=RF00017-5974
piR-41399-421		RNA Gene	3	GC06M151450	1.11836	https://www.genecards.org/cgi-bin/carddisp.pl?gene=piR-41399-421
piR-43103-089		RNA Gene	3	GC07M076559	1.11836	https://www.genecards.org/cgi-bin/carddisp.pl?gene=piR-43103-089
piR-33303-019		RNA Gene	3	GC01P232870	1.11836	https://www.genecards.org/cgi-bin/carddisp.pl?gene=piR-33303-019
piR-32407-003		RNA Gene	3	GC0XP081229	1.11836	https://www.genecards.org/cgi-bin/carddisp.pl?gene=piR-32407-003
piR-36393-462		RNA Gene	3	GC06M151449	1.11836	https://www.genecards.org/cgi-bin/carddisp.pl?gene=piR-36393-462
piR-32214-182		RNA Gene	3	GC14M035171	1.11836	https://www.genecards.org/cgi-bin/carddisp.pl?gene=piR-32214-182
piR-46002-460		RNA Gene	3	GC05M038631	1.11836	https://www.genecards.org/cgi-bin/carddisp.pl?gene=piR-46002-460
piR-50443-519		RNA Gene	3	GC08M097124	1.11836	https://www.genecards.org/cgi-bin/carddisp.pl?gene=piR-50443-519
piR-50447-008		RNA Gene	3	GC03P046047	1.11836	https://www.genecards.org/cgi-bin/carddisp.pl?gene=piR-50447-008
piR-51671-076		RNA Gene	3	GC07P075770	1.11836	https://www.genecards.org/cgi-bin/carddisp.pl?gene=piR-51671-076
NONHSAG047094.2		RNA Gene	3	GC07P023018	1.11836	https://www.genecards.org/cgi-bin/carddisp.pl?gene=NONHSAG047094.2
HSALNG0092197		RNA Gene	3	GC12M068772	1.11836	https://www.genecards.org/cgi-bin/carddisp.pl?gene=HSALNG0092197
HSALNG0123411		RNA Gene	3	GC19P004705	1.11836	https://www.genecards.org/cgi-bin/carddisp.pl?gene=HSALNG0123411
HSALNG0011531		RNA Gene	3	GC01M232894	1.11836	https://www.genecards.org/cgi-bin/carddisp.pl?gene=HSALNG0011531
HSALNG0030835		RNA Gene	3	GC03P176321	1.11836	https://www.genecards.org/cgi-bin/carddisp.pl?gene=HSALNG0030835
HSALNG0023726		RNA Gene	3	GC02P241812	1.11836	https://www.genecards.org/cgi-bin/carddisp.pl?gene=HSALNG0023726
HSALNG0069691-001		RNA Gene	3	GC09P003696	1.11836	https://www.genecards.org/cgi-bin/carddisp.pl?gene=HSALNG0069691-001
HSALNG0078919		RNA Gene	3	GC10M074823	1.11836	https://www.genecards.org/cgi-bin/carddisp.pl?gene=HSALNG0078919
HSALNG0129255		RNA Gene	3	GC20P023397	1.11836	https://www.genecards.org/cgi-bin/carddisp.pl?gene=HSALNG0129255
HSALNG0129256		RNA Gene	3	GC20P023420	1.11836	https://www.genecards.org/cgi-bin/carddisp.pl?gene=HSALNG0129256
HSALNG0078914		RNA Gene	3	GC10P074792	1.11836	https://www.genecards.org/cgi-bin/carddisp.pl?gene=HSALNG0078914
HSALNG0078923		RNA Gene	3	GC10P074871	1.11836	https://www.genecards.org/cgi-bin/carddisp.pl?gene=HSALNG0078923
HSALNG0023725		RNA Gene	3	GC02P241811	1.11836	https://www.genecards.org/cgi-bin/carddisp.pl?gene=HSALNG0023725
HSALNG0054362		RNA Gene	3	GC06M151452	1.11836	https://www.genecards.org/cgi-bin/carddisp.pl?gene=HSALNG0054362
HSALNG0069693		RNA Gene	3	GC09P003761	1.11836	https://www.genecards.org/cgi-bin/carddisp.pl?gene=HSALNG0069693
HSALNG0078920		RNA Gene	3	GC10P074863	1.11836	https://www.genecards.org/cgi-bin/carddisp.pl?gene=HSALNG0078920
HSALNG0079786		RNA Gene	3	GC10M093989	1.11836	https://www.genecards.org/cgi-bin/carddisp.pl?gene=HSALNG0079786
ENSG00000289351	Novel Transcript	RNA Gene	3	GC03P133462	1.11836	https://www.genecards.org/cgi-bin/carddisp.pl?gene=ENSG00000289351
ENSG00000289595	Novel Transcript	RNA Gene	3	GC12P068804	1.11836	https://www.genecards.org/cgi-bin/carddisp.pl?gene=ENSG00000289595
ENSG00000285740	Novel Transcript	RNA Gene	3	GC11P035894	1.11836	https://www.genecards.org/cgi-bin/carddisp.pl?gene=ENSG00000285740
LOC107986082	Uncharacterized LOC107986082	RNA Gene	3	GC03P045792	1.11836	https://www.genecards.org/cgi-bin/carddisp.pl?gene=LOC107986082
LOC105374102	Uncharacterized LOC105374102	RNA Gene	3	GC03P133382	1.11836	https://www.genecards.org/cgi-bin/carddisp.pl?gene=LOC105374102
MN298114-077		RNA Gene	3	GC17P049837	1.11836	https://www.genecards.org/cgi-bin/carddisp.pl?gene=MN298114-077
NONHSAG012343.2		RNA Gene	3	GC12P112919	1.11836	https://www.genecards.org/cgi-bin/carddisp.pl?gene=NONHSAG012343.2
lnc-RHOF-2		RNA Gene	3	GC12M121767	1.11836	https://www.genecards.org/cgi-bin/carddisp.pl?gene=lnc-RHOF-2
lnc-SMIM14-5		RNA Gene	3	GC04M039510	1.11836	https://www.genecards.org/cgi-bin/carddisp.pl?gene=lnc-SMIM14-5
lnc-UXS1-6		RNA Gene	3	GC02M106289	1.11836	https://www.genecards.org/cgi-bin/carddisp.pl?gene=lnc-UXS1-6
lnc-IRS1-8		RNA Gene	3	GC02M226306	1.11836	https://www.genecards.org/cgi-bin/carddisp.pl?gene=lnc-IRS1-8
lnc-KAT6B-1		RNA Gene	3	GC10P075050	1.11836	https://www.genecards.org/cgi-bin/carddisp.pl?gene=lnc-KAT6B-1
HSALNG0115714		RNA Gene	3	GC17M031604	1.11836	https://www.genecards.org/cgi-bin/carddisp.pl?gene=HSALNG0115714
HSALNG0138810		RNA Gene	3	GC0XP081202	1.11836	https://www.genecards.org/cgi-bin/carddisp.pl?gene=HSALNG0138810
piR-53562-351		RNA Gene	3	GC06P151450	1.11836	https://www.genecards.org/cgi-bin/carddisp.pl?gene=piR-53562-351
RF00017-4381		RNA Gene	3	GC05M079127	1.11836	https://www.genecards.org/cgi-bin/carddisp.pl?gene=RF00017-4381
RF00017-4384		RNA Gene	3	GC05M079221	1.11836	https://www.genecards.org/cgi-bin/carddisp.pl?gene=RF00017-4384
RF00017-4383		RNA Gene	3	GC05P079217	1.11836	https://www.genecards.org/cgi-bin/carddisp.pl?gene=RF00017-4383
RF00017-6405		RNA Gene	3	GC08M002000	1.11836	https://www.genecards.org/cgi-bin/carddisp.pl?gene=RF00017-6405
piR-61028-511		RNA Gene	3	GC06P151451	1.11836	https://www.genecards.org/cgi-bin/carddisp.pl?gene=piR-61028-511
RF00017-6981		RNA Gene	3	GC09M003740	1.11836	https://www.genecards.org/cgi-bin/carddisp.pl?gene=RF00017-6981
piR-56759-503		RNA Gene	3	GC06M151451	1.11836	https://www.genecards.org/cgi-bin/carddisp.pl?gene=piR-56759-503
piR-33573		RNA Gene	2	GC21P045608	1.11836	https://www.genecards.org/cgi-bin/carddisp.pl?gene=piR-33573
piR-49220		RNA Gene	2	GC05P076334	1.11836	https://www.genecards.org/cgi-bin/carddisp.pl?gene=piR-49220
piR-32810-041		RNA Gene	2	GC14P066703	1.11836	https://www.genecards.org/cgi-bin/carddisp.pl?gene=piR-32810-041
piR-48759-358		RNA Gene	2	GC05P079279	1.11836	https://www.genecards.org/cgi-bin/carddisp.pl?gene=piR-48759-358
piR-36573-073		RNA Gene	2	GC09M003734	1.11836	https://www.genecards.org/cgi-bin/carddisp.pl?gene=piR-36573-073
piR-50968-032		RNA Gene	2	GC12P112927	1.11836	https://www.genecards.org/cgi-bin/carddisp.pl?gene=piR-50968-032
piR-38580-054		RNA Gene	2	GC11P062453	1.11836	https://www.genecards.org/cgi-bin/carddisp.pl?gene=piR-38580-054
piR-50129-269		RNA Gene	2	GC09M003735	1.11836	https://www.genecards.org/cgi-bin/carddisp.pl?gene=piR-50129-269
piR-36588-267		RNA Gene	2	GC03P017128	1.11836	https://www.genecards.org/cgi-bin/carddisp.pl?gene=piR-36588-267
piR-48349-008		RNA Gene	2	GC02M106273	1.11836	https://www.genecards.org/cgi-bin/carddisp.pl?gene=piR-48349-008
HSALNG0122433		RNA Gene	2	GC18M074297	1.11836	https://www.genecards.org/cgi-bin/carddisp.pl?gene=HSALNG0122433
HSALNG0025661		RNA Gene	2	GC03M046044	1.11836	https://www.genecards.org/cgi-bin/carddisp.pl?gene=HSALNG0025661
HSALNG0037855		RNA Gene	2	GC04P151310	1.11836	https://www.genecards.org/cgi-bin/carddisp.pl?gene=HSALNG0037855
HSALNG0037853		RNA Gene	2	GC04M151361	1.11836	https://www.genecards.org/cgi-bin/carddisp.pl?gene=HSALNG0037853
HSALNG0042915		RNA Gene	2	GC05M079245	1.11836	https://www.genecards.org/cgi-bin/carddisp.pl?gene=HSALNG0042915
HSALNG0040079		RNA Gene	2	GC05P009613	1.11836	https://www.genecards.org/cgi-bin/carddisp.pl?gene=HSALNG0040079
HSALNG0038536		RNA Gene	2	GC04M170841	1.11836	https://www.genecards.org/cgi-bin/carddisp.pl?gene=HSALNG0038536
HSALNG0042774		RNA Gene	2	GC05M076327	1.11836	https://www.genecards.org/cgi-bin/carddisp.pl?gene=HSALNG0042774
HSALNG0024860		RNA Gene	2	GC03P028800	1.11836	https://www.genecards.org/cgi-bin/carddisp.pl?gene=HSALNG0024860
HSALNG0040961		RNA Gene	2	GC05M031657	1.11836	https://www.genecards.org/cgi-bin/carddisp.pl?gene=HSALNG0040961
HSALNG0059646		RNA Gene	2	GC07P094575	1.11836	https://www.genecards.org/cgi-bin/carddisp.pl?gene=HSALNG0059646
HSALNG0003921		RNA Gene	2	GC01M058275	1.11836	https://www.genecards.org/cgi-bin/carddisp.pl?gene=HSALNG0003921
HSALNG0003922		RNA Gene	2	GC01P058320	1.11836	https://www.genecards.org/cgi-bin/carddisp.pl?gene=HSALNG0003922
HSALNG0003920		RNA Gene	2	GC01P058266	1.11836	https://www.genecards.org/cgi-bin/carddisp.pl?gene=HSALNG0003920
ENSG00000288895	Novel Transcript	RNA Gene	2	GC03M176288	1.11836	https://www.genecards.org/cgi-bin/carddisp.pl?gene=ENSG00000288895
LOC101927711	Uncharacterized LOC101927711	RNA Gene	2	GC01P232843	1.11836	https://www.genecards.org/cgi-bin/carddisp.pl?gene=LOC101927711
LOC105378438	Uncharacterized LOC105378438	RNA Gene	2	GC10P094030	1.11836	https://www.genecards.org/cgi-bin/carddisp.pl?gene=LOC105378438
LOC105379042	Uncharacterized LOC105379042	RNA Gene	2	GC05M076286	1.11836	https://www.genecards.org/cgi-bin/carddisp.pl?gene=LOC105379042
lnc-LDHAL6B-2		RNA Gene	2	GC15P059386	1.11836	https://www.genecards.org/cgi-bin/carddisp.pl?gene=lnc-LDHAL6B-2
MK280073-186		RNA Gene	2	GC14M066585	1.11836	https://www.genecards.org/cgi-bin/carddisp.pl?gene=MK280073-186
hsa-miR-5095-339		RNA Gene	2	GC03P028725	1.11836	https://www.genecards.org/cgi-bin/carddisp.pl?gene=hsa-miR-5095-339
LOC112267993	Uncharacterized LOC112267993	RNA Gene	2	GC07P023019	1.11836	https://www.genecards.org/cgi-bin/carddisp.pl?gene=LOC112267993
HSALNG0138801		RNA Gene	2	GC0XM080732	1.11836	https://www.genecards.org/cgi-bin/carddisp.pl?gene=HSALNG0138801
HSALNG0095673		RNA Gene	2	GC13M022636	1.11836	https://www.genecards.org/cgi-bin/carddisp.pl?gene=HSALNG0095673
HSALNG0095676		RNA Gene	2	GC13P022640	1.11836	https://www.genecards.org/cgi-bin/carddisp.pl?gene=HSALNG0095676
HSALNG0129247		RNA Gene	2	GC20P023333	1.11836	https://www.genecards.org/cgi-bin/carddisp.pl?gene=HSALNG0129247
piR-58629		RNA Gene	2	GC10P075051	1.11836	https://www.genecards.org/cgi-bin/carddisp.pl?gene=piR-58629
piR-59907-012		RNA Gene	2	GC18M074327	1.11836	https://www.genecards.org/cgi-bin/carddisp.pl?gene=piR-59907-012
piR-57394-206		RNA Gene	2	GC07M111445	1.11836	https://www.genecards.org/cgi-bin/carddisp.pl?gene=piR-57394-206
piR-56133-133		RNA Gene	2	GC20M023348	1.11836	https://www.genecards.org/cgi-bin/carddisp.pl?gene=piR-56133-133
RF00017-2485		RNA Gene	2	GC18M074384	1.11836	https://www.genecards.org/cgi-bin/carddisp.pl?gene=RF00017-2485
RF00619-027		RNA Gene	2	GC04P170893	1.11836	https://www.genecards.org/cgi-bin/carddisp.pl?gene=RF00619-027
IFITM1	Interferon Induced Transmembrane Protein 1	Protein Coding	40	GC11P000313	1.09584	https://www.genecards.org/cgi-bin/carddisp.pl?gene=IFITM1
KPNA2	Karyopherin Subunit Alpha 2	Protein Coding	44	GC17P068035	1.09111	https://www.genecards.org/cgi-bin/carddisp.pl?gene=KPNA2
CH25H	Cholesterol 25-Hydroxylase	Protein Coding	37	GC10M089205	1.09111	https://www.genecards.org/cgi-bin/carddisp.pl?gene=CH25H
ATP1B1	ATPase Na+/K+ Transporting Subunit Beta 1	Protein Coding	47	GC01P169105	1.07311	https://www.genecards.org/cgi-bin/carddisp.pl?gene=ATP1B1
HYOU1	Hypoxia Up-Regulated 1	Protein Coding	44	GC11M119156	1.07311	https://www.genecards.org/cgi-bin/carddisp.pl?gene=HYOU1
SIRT5	Sirtuin 5	Protein Coding	44	GC06P013574	1.07311	https://www.genecards.org/cgi-bin/carddisp.pl?gene=SIRT5
PCNT	Pericentrin	Protein Coding	43	GC21P046324	1.07311	https://www.genecards.org/cgi-bin/carddisp.pl?gene=PCNT
FKBP10	FKBP Prolyl Isomerase 10	Protein Coding	42	GC17P041812	1.07311	https://www.genecards.org/cgi-bin/carddisp.pl?gene=FKBP10
TARS2	Threonyl-TRNA Synthetase 2, Mitochondrial	Protein Coding	42	GC01P150536	1.07311	https://www.genecards.org/cgi-bin/carddisp.pl?gene=TARS2
ERC1	ELKS/RAB6-Interacting/CAST Family Member 1	Protein Coding	41	GC12P000972	1.07311	https://www.genecards.org/cgi-bin/carddisp.pl?gene=ERC1
ERP44	Endoplasmic Reticulum Protein 44	Protein Coding	41	GC09M099979	1.07311	https://www.genecards.org/cgi-bin/carddisp.pl?gene=ERP44
GTF2F2	General Transcription Factor IIF Subunit 2	Protein Coding	41	GC13P045120	1.07311	https://www.genecards.org/cgi-bin/carddisp.pl?gene=GTF2F2
EDEM3	ER Degradation Enhancing Alpha-Mannosidase Like Protein 3	Protein Coding	38	GC01M184690	1.07311	https://www.genecards.org/cgi-bin/carddisp.pl?gene=EDEM3
HECTD1	HECT Domain E3 Ubiquitin Protein Ligase 1	Protein Coding	37	GC14M031100	1.07311	https://www.genecards.org/cgi-bin/carddisp.pl?gene=HECTD1
MYCBP2	MYC Binding Protein 2	Protein Coding	37	GC13M077044	1.07311	https://www.genecards.org/cgi-bin/carddisp.pl?gene=MYCBP2
CHPF2	Chondroitin Polymerizing Factor 2	Protein Coding	37	GC07P151232	1.07311	https://www.genecards.org/cgi-bin/carddisp.pl?gene=CHPF2
GOLGA3	Golgin A3	Protein Coding	36	GC12M132768	1.07311	https://www.genecards.org/cgi-bin/carddisp.pl?gene=GOLGA3
TRIM59	Tripartite Motif Containing 59	Protein Coding	35	GC03M160432	1.07311	https://www.genecards.org/cgi-bin/carddisp.pl?gene=TRIM59
ERLEC1	Endoplasmic Reticulum Lectin 1	Protein Coding	35	GC02P053786	1.07311	https://www.genecards.org/cgi-bin/carddisp.pl?gene=ERLEC1
DNAJC11	DnaJ Heat Shock Protein Family (Hsp40) Member C11	Protein Coding	34	GC01M006634	1.07311	https://www.genecards.org/cgi-bin/carddisp.pl?gene=DNAJC11
SPART	Spartin	Protein Coding	32	GC13M036302	1.07311	https://www.genecards.org/cgi-bin/carddisp.pl?gene=SPART
COMT	Catechol-O-Methyltransferase	Protein Coding	50	GC22P019941	1.04209	https://www.genecards.org/cgi-bin/carddisp.pl?gene=COMT
ADAM9	ADAM Metallopeptidase Domain 9	Protein Coding	49	GC08P038996	1.04209	https://www.genecards.org/cgi-bin/carddisp.pl?gene=ADAM9
CSNK2A2	Casein Kinase 2 Alpha 2	Protein Coding	46	GC16M058157	1.04209	https://www.genecards.org/cgi-bin/carddisp.pl?gene=CSNK2A2
RTN4	Reticulon 4	Protein Coding	44	GC02M054934	1.04209	https://www.genecards.org/cgi-bin/carddisp.pl?gene=RTN4
PVR	PVR Cell Adhesion Molecule	Protein Coding	44	GC19P051984	1.04209	https://www.genecards.org/cgi-bin/carddisp.pl?gene=PVR
GGH	Gamma-Glutamyl Hydrolase	Protein Coding	42	GC08M063015	1.04209	https://www.genecards.org/cgi-bin/carddisp.pl?gene=GGH
PLD3	Phospholipase D Family Member 3	Protein Coding	42	GC19P040348	1.04209	https://www.genecards.org/cgi-bin/carddisp.pl?gene=PLD3
RAB2A	RAB2A, Member RAS Oncogene Family	Protein Coding	41	GC08P060516	1.04209	https://www.genecards.org/cgi-bin/carddisp.pl?gene=RAB2A
HS6ST2	Heparan Sulfate 6-O-Sulfotransferase 2	Protein Coding	40	GC0XM132626	1.04209	https://www.genecards.org/cgi-bin/carddisp.pl?gene=HS6ST2
ATE1	Arginyltransferase 1	Protein Coding	40	GC10M121740	1.04209	https://www.genecards.org/cgi-bin/carddisp.pl?gene=ATE1
RAB1A	RAB1A, Member RAS Oncogene Family	Protein Coding	40	GC02M065072	1.04209	https://www.genecards.org/cgi-bin/carddisp.pl?gene=RAB1A
NPTX1	Neuronal Pentraxin 1	Protein Coding	39	GC17M080466	1.04209	https://www.genecards.org/cgi-bin/carddisp.pl?gene=NPTX1
EIF4E2	Eukaryotic Translation Initiation Factor 4E Family Member 2	Protein Coding	39	GC02P232550	1.04209	https://www.genecards.org/cgi-bin/carddisp.pl?gene=EIF4E2
MDN1	Midasin AAA ATPase 1	Protein Coding	38	GC06M089642	1.04209	https://www.genecards.org/cgi-bin/carddisp.pl?gene=MDN1
LMAN2	Lectin, Mannose Binding 2	Protein Coding	37	GC05M177856	1.04209	https://www.genecards.org/cgi-bin/carddisp.pl?gene=LMAN2
QSOX2	Quiescin Sulfhydryl Oxidase 2	Protein Coding	37	GC09M136206	1.04209	https://www.genecards.org/cgi-bin/carddisp.pl?gene=QSOX2
FAM8A1	Family With Sequence Similarity 8 Member A1	Protein Coding	34	GC06P017600	1.04209	https://www.genecards.org/cgi-bin/carddisp.pl?gene=FAM8A1
COQ8B	Coenzyme Q8B	Protein Coding	33	GC19M061872	1.04209	https://www.genecards.org/cgi-bin/carddisp.pl?gene=COQ8B
IKBKE	Inhibitor Of Nuclear Factor Kappa B Kinase Subunit Epsilon	Protein Coding	45	GC01P206470	1.03737	https://www.genecards.org/cgi-bin/carddisp.pl?gene=IKBKE
RNASEL	Ribonuclease L	Protein Coding	44	GC01M182573	1.03737	https://www.genecards.org/cgi-bin/carddisp.pl?gene=RNASEL
STUB1	STIP1 Homology And U-Box Containing Protein 1	Protein Coding	44	GC16P009834	1.0292	https://www.genecards.org/cgi-bin/carddisp.pl?gene=STUB1
FXR1	FMR1 Autosomal Homolog 1	Protein Coding	43	GC03P180868	1.0292	https://www.genecards.org/cgi-bin/carddisp.pl?gene=FXR1
FANCI	FA Complementation Group I	Protein Coding	41	GC15P089243	1.0292	https://www.genecards.org/cgi-bin/carddisp.pl?gene=FANCI
LY6E	Lymphocyte Antigen 6 Family Member E	Protein Coding	40	GC08P143017	1.02571	https://www.genecards.org/cgi-bin/carddisp.pl?gene=LY6E
CTSB	Cathepsin B	Protein Coding	50	GC08M011842	1.01354	https://www.genecards.org/cgi-bin/carddisp.pl?gene=CTSB
USP13	Ubiquitin Specific Peptidase 13	Protein Coding	44	GC03P179652	1.01354	https://www.genecards.org/cgi-bin/carddisp.pl?gene=USP13
CUL2	Cullin 2	Protein Coding	41	GC10M035046	1.01354	https://www.genecards.org/cgi-bin/carddisp.pl?gene=CUL2
MOV10	Mov10 RISC Complex RNA Helicase	Protein Coding	40	GC01P112673	1.01354	https://www.genecards.org/cgi-bin/carddisp.pl?gene=MOV10
ZYG11B	Zyg-11 Family Member B, Cell Cycle Regulator	Protein Coding	33	GC01P052726	1.01354	https://www.genecards.org/cgi-bin/carddisp.pl?gene=ZYG11B
ELOB	Elongin B	Protein Coding	32	GC16M006360	1.01354	https://www.genecards.org/cgi-bin/carddisp.pl?gene=ELOB
STIM1	Stromal Interaction Molecule 1	Protein Coding	48	GC11P003855	1.00559	https://www.genecards.org/cgi-bin/carddisp.pl?gene=STIM1
MTHFD1	Methylenetetrahydrofolate Dehydrogenase, Cyclohydrolase And Formyltetrahydrofolate Synthetase 1	Protein Coding	45	GC14P064388	1.00559	https://www.genecards.org/cgi-bin/carddisp.pl?gene=MTHFD1
PABPC4	Poly(A) Binding Protein Cytoplasmic 4	Protein Coding	40	GC01M039560	1.00559	https://www.genecards.org/cgi-bin/carddisp.pl?gene=PABPC4
SURF4	Surfeit 4	Protein Coding	37	GC09M133361	1.00559	https://www.genecards.org/cgi-bin/carddisp.pl?gene=SURF4
PHB1	Prohibitin 1	Protein Coding	35	GC17M049406	1.00559	https://www.genecards.org/cgi-bin/carddisp.pl?gene=PHB1
SPINT2	Serine Peptidase Inhibitor, Kunitz Type 2	Protein Coding	43	GC19P038244	0.982489	https://www.genecards.org/cgi-bin/carddisp.pl?gene=SPINT2
TM9SF2	Transmembrane 9 Superfamily Member 2	Protein Coding	37	GC13P099446	0.982489	https://www.genecards.org/cgi-bin/carddisp.pl?gene=TM9SF2
TRIM25	Tripartite Motif Containing 25	Protein Coding	42	GC17M056836	0.948144	https://www.genecards.org/cgi-bin/carddisp.pl?gene=TRIM25
TMEM41B	Transmembrane Protein 41B	Protein Coding	33	GC11M009280	0.948144	https://www.genecards.org/cgi-bin/carddisp.pl?gene=TMEM41B
NUP214	Nucleoporin 214	Protein Coding	45	GC09P131125	0.947219	https://www.genecards.org/cgi-bin/carddisp.pl?gene=NUP214
PLOD2	Procollagen-Lysine,2-Oxoglutarate 5-Dioxygenase 2	Protein Coding	45	GC03M146069	0.947219	https://www.genecards.org/cgi-bin/carddisp.pl?gene=PLOD2
NIN	Ninein	Protein Coding	42	GC14M050719	0.947219	https://www.genecards.org/cgi-bin/carddisp.pl?gene=NIN
EIF4H	Eukaryotic Translation Initiation Factor 4H	Protein Coding	41	GC07P074174	0.947219	https://www.genecards.org/cgi-bin/carddisp.pl?gene=EIF4H
SIL1	SIL1 Nucleotide Exchange Factor	Protein Coding	40	GC05M138957	0.947219	https://www.genecards.org/cgi-bin/carddisp.pl?gene=SIL1
CEP250	Centrosomal Protein 250	Protein Coding	40	GC20P035455	0.947219	https://www.genecards.org/cgi-bin/carddisp.pl?gene=CEP250
CEP135	Centrosomal Protein 135	Protein Coding	38	GC04P055948	0.947219	https://www.genecards.org/cgi-bin/carddisp.pl?gene=CEP135
CNTRL	Centriolin	Protein Coding	37	GC09P121074	0.947219	https://www.genecards.org/cgi-bin/carddisp.pl?gene=CNTRL
ARL6IP6	ADP Ribosylation Factor Like GTPase 6 Interacting Protein 6	Protein Coding	34	GC02P152717	0.947219	https://www.genecards.org/cgi-bin/carddisp.pl?gene=ARL6IP6
CCDC86	Coiled-Coil Domain Containing 86	Protein Coding	33	GC11P060957	0.947219	https://www.genecards.org/cgi-bin/carddisp.pl?gene=CCDC86
ITGB1	Integrin Subunit Beta 1	Protein Coding	49	GC10M032932	0.925496	https://www.genecards.org/cgi-bin/carddisp.pl?gene=ITGB1
POR	Cytochrome P450 Oxidoreductase	Protein Coding	49	GC07P075899	0.925496	https://www.genecards.org/cgi-bin/carddisp.pl?gene=POR
RIPK1	Receptor Interacting Serine/Threonine Kinase 1	Protein Coding	48	GC06P003155	0.925496	https://www.genecards.org/cgi-bin/carddisp.pl?gene=RIPK1
RDX	Radixin	Protein Coding	48	GC11M109864	0.925496	https://www.genecards.org/cgi-bin/carddisp.pl?gene=RDX
GLA	Galactosidase Alpha	Protein Coding	47	GC0XM101393	0.925496	https://www.genecards.org/cgi-bin/carddisp.pl?gene=GLA
IMPDH2	Inosine Monophosphate Dehydrogenase 2	Protein Coding	46	GC03M050872	0.925496	https://www.genecards.org/cgi-bin/carddisp.pl?gene=IMPDH2
RHOA	Ras Homolog Family Member A	Protein Coding	46	GC03M049359	0.925496	https://www.genecards.org/cgi-bin/carddisp.pl?gene=RHOA
NEK9	NIMA Related Kinase 9	Protein Coding	45	GC14M075079	0.925496	https://www.genecards.org/cgi-bin/carddisp.pl?gene=NEK9
ADAMTS1	ADAM Metallopeptidase With Thrombospondin Type 1 Motif 1	Protein Coding	45	GC21M026835	0.925496	https://www.genecards.org/cgi-bin/carddisp.pl?gene=ADAMTS1
TOR1A	Torsin Family 1 Member A	Protein Coding	45	GC09M129812	0.925496	https://www.genecards.org/cgi-bin/carddisp.pl?gene=TOR1A
ETFA	Electron Transfer Flavoprotein Subunit Alpha	Protein Coding	45	GC15M079552	0.925496	https://www.genecards.org/cgi-bin/carddisp.pl?gene=ETFA
CYB5R3	Cytochrome B5 Reductase 3	Protein Coding	45	GC22M055106	0.925496	https://www.genecards.org/cgi-bin/carddisp.pl?gene=CYB5R3
MIB1	MIB E3 Ubiquitin Protein Ligase 1	Protein Coding	45	GC18P021704	0.925496	https://www.genecards.org/cgi-bin/carddisp.pl?gene=MIB1
RALA	RAS Like Proto-Oncogene A	Protein Coding	45	GC07P039622	0.925496	https://www.genecards.org/cgi-bin/carddisp.pl?gene=RALA
PPT1	Palmitoyl-Protein Thioesterase 1	Protein Coding	45	GC01M040072	0.925496	https://www.genecards.org/cgi-bin/carddisp.pl?gene=PPT1
GNB1	G Protein Subunit Beta 1	Protein Coding	44	GC01M001785	0.925496	https://www.genecards.org/cgi-bin/carddisp.pl?gene=GNB1
NGLY1	N-Glycanase 1	Protein Coding	44	GC03M025718	0.925496	https://www.genecards.org/cgi-bin/carddisp.pl?gene=NGLY1
MFGE8	Milk Fat Globule EGF And Factor V/VIII Domain Containing	Protein Coding	44	GC15M088898	0.925496	https://www.genecards.org/cgi-bin/carddisp.pl?gene=MFGE8
PMPCA	Peptidase, Mitochondrial Processing Subunit Alpha	Protein Coding	44	GC09P136410	0.925496	https://www.genecards.org/cgi-bin/carddisp.pl?gene=PMPCA
TLE1	TLE Family Member 1, Transcriptional Corepressor	Protein Coding	44	GC09M081583	0.925496	https://www.genecards.org/cgi-bin/carddisp.pl?gene=TLE1
ATP6V1A	ATPase H+ Transporting V1 Subunit A	Protein Coding	44	GC03P113747	0.925496	https://www.genecards.org/cgi-bin/carddisp.pl?gene=ATP6V1A
POFUT1	Protein O-Fucosyltransferase 1	Protein Coding	44	GC20P032207	0.925496	https://www.genecards.org/cgi-bin/carddisp.pl?gene=POFUT1
PKP2	Plakophilin 2	Protein Coding	44	GC12M032790	0.925496	https://www.genecards.org/cgi-bin/carddisp.pl?gene=PKP2
SLC27A2	Solute Carrier Family 27 Member 2	Protein Coding	44	GC15P050182	0.925496	https://www.genecards.org/cgi-bin/carddisp.pl?gene=SLC27A2
ARF6	ADP Ribosylation Factor 6	Protein Coding	43	GC14P049895	0.925496	https://www.genecards.org/cgi-bin/carddisp.pl?gene=ARF6
CENPF	Centromere Protein F	Protein Coding	43	GC01P214603	0.925496	https://www.genecards.org/cgi-bin/carddisp.pl?gene=CENPF
AASS	Aminoadipate-Semialdehyde Synthase	Protein Coding	43	GC07M122073	0.925496	https://www.genecards.org/cgi-bin/carddisp.pl?gene=AASS
PMPCB	Peptidase, Mitochondrial Processing Subunit Beta	Protein Coding	43	GC07P103297	0.925496	https://www.genecards.org/cgi-bin/carddisp.pl?gene=PMPCB
NPC2	NPC Intracellular Cholesterol Transporter 2	Protein Coding	42	GC14M074476	0.925496	https://www.genecards.org/cgi-bin/carddisp.pl?gene=NPC2
NARS2	Asparaginyl-TRNA Synthetase 2, Mitochondrial	Protein Coding	42	GC11M078435	0.925496	https://www.genecards.org/cgi-bin/carddisp.pl?gene=NARS2
HS2ST1	Heparan Sulfate 2-O-Sulfotransferase 1	Protein Coding	42	GC01P086914	0.925496	https://www.genecards.org/cgi-bin/carddisp.pl?gene=HS2ST1
MOGS	Mannosyl-Oligosaccharide Glucosidase	Protein Coding	42	GC02M074461	0.925496	https://www.genecards.org/cgi-bin/carddisp.pl?gene=MOGS
AGPS	Alkylglycerone Phosphate Synthase	Protein Coding	42	GC02P177392	0.925496	https://www.genecards.org/cgi-bin/carddisp.pl?gene=AGPS
PTGES2	Prostaglandin E Synthase 2	Protein Coding	42	GC09M128120	0.925496	https://www.genecards.org/cgi-bin/carddisp.pl?gene=PTGES2
TRMT1	TRNA Methyltransferase 1	Protein Coding	42	GC19M013104	0.925496	https://www.genecards.org/cgi-bin/carddisp.pl?gene=TRMT1
TLE3	TLE Family Member 3, Transcriptional Corepressor	Protein Coding	42	GC15M070047	0.925496	https://www.genecards.org/cgi-bin/carddisp.pl?gene=TLE3
SRP54	Signal Recognition Particle 54	Protein Coding	42	GC14P034981	0.925496	https://www.genecards.org/cgi-bin/carddisp.pl?gene=SRP54
GOLGA2	Golgin A2	Protein Coding	41	GC09M128255	0.925496	https://www.genecards.org/cgi-bin/carddisp.pl?gene=GOLGA2
PDE4DIP	Phosphodiesterase 4D Interacting Protein	Protein Coding	41	GC01P148808	0.925496	https://www.genecards.org/cgi-bin/carddisp.pl?gene=PDE4DIP
OS9	OS9 Endoplasmic Reticulum Lectin	Protein Coding	41	GC12P057693	0.925496	https://www.genecards.org/cgi-bin/carddisp.pl?gene=OS9
STC2	Stanniocalcin 2	Protein Coding	41	GC05M173314	0.925496	https://www.genecards.org/cgi-bin/carddisp.pl?gene=STC2
RAB10	RAB10, Member RAS Oncogene Family	Protein Coding	41	GC02P026033	0.925496	https://www.genecards.org/cgi-bin/carddisp.pl?gene=RAB10
PCSK6	Proprotein Convertase Subtilisin/Kexin Type 6	Protein Coding	41	GC15M114818	0.925496	https://www.genecards.org/cgi-bin/carddisp.pl?gene=PCSK6
ZMPSTE24	Zinc Metallopeptidase STE24	Protein Coding	41	GC01P040258	0.925496	https://www.genecards.org/cgi-bin/carddisp.pl?gene=ZMPSTE24
NDUFAF2	NADH:Ubiquinone Oxidoreductase Complex Assembly Factor 2	Protein Coding	40	GC05P060945	0.925496	https://www.genecards.org/cgi-bin/carddisp.pl?gene=NDUFAF2
ACSL3	Acyl-CoA Synthetase Long Chain Family Member 3	Protein Coding	40	GC02P222860	0.925496	https://www.genecards.org/cgi-bin/carddisp.pl?gene=ACSL3
TOR1AIP1	Torsin 1A Interacting Protein 1	Protein Coding	40	GC01P179882	0.925496	https://www.genecards.org/cgi-bin/carddisp.pl?gene=TOR1AIP1
ALG11	ALG11 Alpha-1,2-Mannosyltransferase	Protein Coding	40	GC13P052012	0.925496	https://www.genecards.org/cgi-bin/carddisp.pl?gene=ALG11
NUP210	Nucleoporin 210	Protein Coding	40	GC03M019699	0.925496	https://www.genecards.org/cgi-bin/carddisp.pl?gene=NUP210
PITRM1	Pitrilysin Metallopeptidase 1	Protein Coding	40	GC10M003138	0.925496	https://www.genecards.org/cgi-bin/carddisp.pl?gene=PITRM1
RAB5C	RAB5C, Member RAS Oncogene Family	Protein Coding	40	GC17M042124	0.925496	https://www.genecards.org/cgi-bin/carddisp.pl?gene=RAB5C
GRPEL1	GrpE Like 1, Mitochondrial	Protein Coding	39	GC04M007060	0.925496	https://www.genecards.org/cgi-bin/carddisp.pl?gene=GRPEL1
TUBGCP2	Tubulin Gamma Complex Associated Protein 2	Protein Coding	39	GC10M133278	0.925496	https://www.genecards.org/cgi-bin/carddisp.pl?gene=TUBGCP2
RAB18	RAB18, Member RAS Oncogene Family	Protein Coding	39	GC10P027504	0.925496	https://www.genecards.org/cgi-bin/carddisp.pl?gene=RAB18
UPF1	UPF1 RNA Helicase And ATPase	Protein Coding	39	GC19P018831	0.925496	https://www.genecards.org/cgi-bin/carddisp.pl?gene=UPF1
RBM28	RNA Binding Motif Protein 28	Protein Coding	38	GC07M128381	0.925496	https://www.genecards.org/cgi-bin/carddisp.pl?gene=RBM28
TIMM8B	Translocase Of Inner Mitochondrial Membrane 8 Homolog B	Protein Coding	38	GC11M112084	0.925496	https://www.genecards.org/cgi-bin/carddisp.pl?gene=TIMM8B
SUN2	Sad1 And UNC84 Domain Containing 2	Protein Coding	38	GC22M055082	0.925496	https://www.genecards.org/cgi-bin/carddisp.pl?gene=SUN2
SLC30A7	Solute Carrier Family 30 Member 7	Protein Coding	38	GC01P100896	0.925496	https://www.genecards.org/cgi-bin/carddisp.pl?gene=SLC30A7
GCC2	GRIP And Coiled-Coil Domain Containing 2	Protein Coding	37	GC02P108432	0.925496	https://www.genecards.org/cgi-bin/carddisp.pl?gene=GCC2
GOLGA7	Golgin A7	Protein Coding	37	GC08P041467	0.925496	https://www.genecards.org/cgi-bin/carddisp.pl?gene=GOLGA7
MTCH1	Mitochondrial Carrier 1	Protein Coding	37	GC06M061450	0.925496	https://www.genecards.org/cgi-bin/carddisp.pl?gene=MTCH1
SDF2	Stromal Cell Derived Factor 2	Protein Coding	37	GC17M033774	0.925496	https://www.genecards.org/cgi-bin/carddisp.pl?gene=SDF2
CHPF	Chondroitin Polymerizing Factor	Protein Coding	37	GC02M219538	0.925496	https://www.genecards.org/cgi-bin/carddisp.pl?gene=CHPF
ATP13A3	ATPase 13A3	Protein Coding	37	GC03M194402	0.925496	https://www.genecards.org/cgi-bin/carddisp.pl?gene=ATP13A3
AP2A2	Adaptor Related Protein Complex 2 Subunit Alpha 2	Protein Coding	37	GC11P000924	0.925496	https://www.genecards.org/cgi-bin/carddisp.pl?gene=AP2A2
PPIL3	Peptidylprolyl Isomerase Like 3	Protein Coding	37	GC02M200870	0.925496	https://www.genecards.org/cgi-bin/carddisp.pl?gene=PPIL3
COLGALT1	Collagen Beta(1-O)Galactosyltransferase 1	Protein Coding	37	GC19P017555	0.925496	https://www.genecards.org/cgi-bin/carddisp.pl?gene=COLGALT1
EMC1	ER Membrane Protein Complex Subunit 1	Protein Coding	36	GC01M019215	0.925496	https://www.genecards.org/cgi-bin/carddisp.pl?gene=EMC1
INTS4	Integrator Complex Subunit 4	Protein Coding	36	GC11M085124	0.925496	https://www.genecards.org/cgi-bin/carddisp.pl?gene=INTS4
NUP54	Nucleoporin 54	Protein Coding	36	GC04M076114	0.925496	https://www.genecards.org/cgi-bin/carddisp.pl?gene=NUP54
SCCPDH	Saccharopine Dehydrogenase (Putative)	Protein Coding	36	GC01P246724	0.925496	https://www.genecards.org/cgi-bin/carddisp.pl?gene=SCCPDH
UBAP2L	Ubiquitin Associated Protein 2 Like	Protein Coding	36	GC01P154219	0.925496	https://www.genecards.org/cgi-bin/carddisp.pl?gene=UBAP2L
ZDHHC5	Zinc Finger DHHC-Type Palmitoyltransferase 5	Protein Coding	36	GC11P057670	0.925496	https://www.genecards.org/cgi-bin/carddisp.pl?gene=ZDHHC5
GRIPAP1	GRIP1 Associated Protein 1	Protein Coding	35	GC0XM048973	0.925496	https://www.genecards.org/cgi-bin/carddisp.pl?gene=GRIPAP1
TIMM10B	Translocase Of Inner Mitochondrial Membrane 10B	Protein Coding	35	GC11P006482	0.925496	https://www.genecards.org/cgi-bin/carddisp.pl?gene=TIMM10B
ZNF503	Zinc Finger Protein 503	Protein Coding	35	GC10M075280	0.925496	https://www.genecards.org/cgi-bin/carddisp.pl?gene=ZNF503
FKBP15	FKBP Prolyl Isomerase Family Member 15	Protein Coding	34	GC09M113161	0.925496	https://www.genecards.org/cgi-bin/carddisp.pl?gene=FKBP15
FAM162A	Family With Sequence Similarity 162 Member A	Protein Coding	34	GC03P122384	0.925496	https://www.genecards.org/cgi-bin/carddisp.pl?gene=FAM162A
RRP9	Ribosomal RNA Processing 9, U3 Small Nucleolar RNA Binding Protein	Protein Coding	34	GC03M051943	0.925496	https://www.genecards.org/cgi-bin/carddisp.pl?gene=RRP9
LARP4B	La Ribonucleoprotein 4B	Protein Coding	33	GC10M000806	0.925496	https://www.genecards.org/cgi-bin/carddisp.pl?gene=LARP4B
ERO1B	Endoplasmic Reticulum Oxidoreductase 1 Beta	Protein Coding	33	GC01M236216	0.925496	https://www.genecards.org/cgi-bin/carddisp.pl?gene=ERO1B
FAM98A	Family With Sequence Similarity 98 Member A	Protein Coding	33	GC02M033532	0.925496	https://www.genecards.org/cgi-bin/carddisp.pl?gene=FAM98A
PRRC2B	Proline Rich Coiled-Coil 2B	Protein Coding	33	GC09P131373	0.925496	https://www.genecards.org/cgi-bin/carddisp.pl?gene=PRRC2B
UBAP2	Ubiquitin Associated Protein 2	Protein Coding	33	GC09M033921	0.925496	https://www.genecards.org/cgi-bin/carddisp.pl?gene=UBAP2
SELENOS	Selenoprotein S	Protein Coding	30	GC15M114819	0.925496	https://www.genecards.org/cgi-bin/carddisp.pl?gene=SELENOS
ATP5MG	ATP Synthase Membrane Subunit G	Protein Coding	30	GC11P118403	0.925496	https://www.genecards.org/cgi-bin/carddisp.pl?gene=ATP5MG
WASHC4	WASH Complex Subunit 4	Protein Coding	29	GC12P105108	0.925496	https://www.genecards.org/cgi-bin/carddisp.pl?gene=WASHC4
MTARC1	Mitochondrial Amidoxime Reducing Component 1	Protein Coding	28	GC01P220788	0.925496	https://www.genecards.org/cgi-bin/carddisp.pl?gene=MTARC1
NUP58	Nucleoporin 58	Protein Coding	28	GC13P025305	0.925496	https://www.genecards.org/cgi-bin/carddisp.pl?gene=NUP58
POGLUT3	Protein O-Glucosyltransferase 3	Protein Coding	25	GC11M108473	0.925496	https://www.genecards.org/cgi-bin/carddisp.pl?gene=POGLUT3
CXCL9	C-X-C Motif Chemokine Ligand 9	Protein Coding	38	GC04M076001	0.924763	https://www.genecards.org/cgi-bin/carddisp.pl?gene=CXCL9
KREMEN1	Kringle Containing Transmembrane Protein 1	Protein Coding	44	GC22P029073	0.909161	https://www.genecards.org/cgi-bin/carddisp.pl?gene=KREMEN1
IFITM2	Interferon Induced Transmembrane Protein 2	Protein Coding	37	GC11P000300	0.909161	https://www.genecards.org/cgi-bin/carddisp.pl?gene=IFITM2
ALDH7A1	Aldehyde Dehydrogenase 7 Family Member A1	Protein Coding	47	GC05M126541	0.901153	https://www.genecards.org/cgi-bin/carddisp.pl?gene=ALDH7A1
P4HB	Prolyl 4-Hydroxylase Subunit Beta	Protein Coding	47	GC17M081843	0.901153	https://www.genecards.org/cgi-bin/carddisp.pl?gene=P4HB
GALNT2	Polypeptide N-Acetylgalactosaminyltransferase 2	Protein Coding	46	GC01P230057	0.901153	https://www.genecards.org/cgi-bin/carddisp.pl?gene=GALNT2
PLOD1	Procollagen-Lysine,2-Oxoglutarate 5-Dioxygenase 1	Protein Coding	43	GC01P011934	0.901153	https://www.genecards.org/cgi-bin/carddisp.pl?gene=PLOD1
SEL1L	SEL1L Adaptor Subunit Of ERAD E3 Ubiquitin Ligase	Protein Coding	42	GC14M081471	0.901153	https://www.genecards.org/cgi-bin/carddisp.pl?gene=SEL1L
TOM1	Target Of Myb1 Membrane Trafficking Protein	Protein Coding	42	GC22P035299	0.901153	https://www.genecards.org/cgi-bin/carddisp.pl?gene=TOM1
PSMC4	Proteasome 26S Subunit, ATPase 4	Protein Coding	41	GC19P051655	0.901153	https://www.genecards.org/cgi-bin/carddisp.pl?gene=PSMC4
TMEM43	Transmembrane Protein 43	Protein Coding	41	GC03P014124	0.901153	https://www.genecards.org/cgi-bin/carddisp.pl?gene=TMEM43
PIBF1	Progesterone Immunomodulatory Binding Factor 1	Protein Coding	41	GC13P072782	0.901153	https://www.genecards.org/cgi-bin/carddisp.pl?gene=PIBF1
FUCA2	Alpha-L-Fucosidase 2	Protein Coding	40	GC06M143494	0.901153	https://www.genecards.org/cgi-bin/carddisp.pl?gene=FUCA2
PDIA4	Protein Disulfide Isomerase Family A Member 4	Protein Coding	40	GC07M149003	0.901153	https://www.genecards.org/cgi-bin/carddisp.pl?gene=PDIA4
TES	Testin LIM Domain Protein	Protein Coding	40	GC07P116210	0.901153	https://www.genecards.org/cgi-bin/carddisp.pl?gene=TES
SUMF2	Sulfatase Modifying Factor 2	Protein Coding	39	GC07P056491	0.901153	https://www.genecards.org/cgi-bin/carddisp.pl?gene=SUMF2
FXR2	FMR1 Autosomal Homolog 2	Protein Coding	38	GC17M007657	0.901153	https://www.genecards.org/cgi-bin/carddisp.pl?gene=FXR2
IPO11	Importin 11	Protein Coding	38	GC05P062403	0.901153	https://www.genecards.org/cgi-bin/carddisp.pl?gene=IPO11
MYO18A	Myosin XVIIIA	Protein Coding	38	GC17M033780	0.901153	https://www.genecards.org/cgi-bin/carddisp.pl?gene=MYO18A
UGGT1	UDP-Glucose Glycoprotein Glucosyltransferase 1	Protein Coding	38	GC02P128091	0.901153	https://www.genecards.org/cgi-bin/carddisp.pl?gene=UGGT1
CCDC22	Coiled-Coil Domain Containing 22	Protein Coding	38	GC0XP050342	0.901153	https://www.genecards.org/cgi-bin/carddisp.pl?gene=CCDC22
LMAN2L	Lectin, Mannose Binding 2 Like	Protein Coding	38	GC02M097775	0.901153	https://www.genecards.org/cgi-bin/carddisp.pl?gene=LMAN2L
ZFR	Zinc Finger RNA Binding Protein	Protein Coding	38	GC05M032390	0.901153	https://www.genecards.org/cgi-bin/carddisp.pl?gene=ZFR
URB2	URB2 Ribosome Biogenesis Homolog	Protein Coding	34	GC01P229626	0.901153	https://www.genecards.org/cgi-bin/carddisp.pl?gene=URB2
ERO1A	Endoplasmic Reticulum Oxidoreductase 1 Alpha	Protein Coding	34	GC14M052640	0.901153	https://www.genecards.org/cgi-bin/carddisp.pl?gene=ERO1A
CEP131	Centrosomal Protein 131	Protein Coding	33	GC17M081189	0.901153	https://www.genecards.org/cgi-bin/carddisp.pl?gene=CEP131
NUP62	Nucleoporin 62	Protein Coding	44	GC19M049906	0.894446	https://www.genecards.org/cgi-bin/carddisp.pl?gene=NUP62
RBX1	Ring-Box 1	Protein Coding	42	GC22P040951	0.894446	https://www.genecards.org/cgi-bin/carddisp.pl?gene=RBX1
HAVCR1	Hepatitis A Virus Cellular Receptor 1	Protein Coding	41	GC05M157028	0.894446	https://www.genecards.org/cgi-bin/carddisp.pl?gene=HAVCR1
LARP1	La Ribonucleoprotein 1, Translational Regulator	Protein Coding	38	GC05P154682	0.894446	https://www.genecards.org/cgi-bin/carddisp.pl?gene=LARP1
ALPL	Alkaline Phosphatase, Biomineralization Associated	Protein Coding	51	GC01P021508	0.891878	https://www.genecards.org/cgi-bin/carddisp.pl?gene=ALPL
IL1RN	Interleukin 1 Receptor Antagonist	Protein Coding	48	GC02P120921	0.891878	https://www.genecards.org/cgi-bin/carddisp.pl?gene=IL1RN
GATA4	GATA Binding Protein 4	Protein Coding	48	GC08P011676	0.891878	https://www.genecards.org/cgi-bin/carddisp.pl?gene=GATA4
MMP8	Matrix Metallopeptidase 8	Protein Coding	48	GC11M102617	0.891878	https://www.genecards.org/cgi-bin/carddisp.pl?gene=MMP8
ABCA3	ATP Binding Cassette Subfamily A Member 3	Protein Coding	48	GC16M002275	0.891878	https://www.genecards.org/cgi-bin/carddisp.pl?gene=ABCA3
PDE4D	Phosphodiesterase 4D	Protein Coding	48	GC05M058969	0.891878	https://www.genecards.org/cgi-bin/carddisp.pl?gene=PDE4D
CXCR2	C-X-C Motif Chemokine Receptor 2	Protein Coding	48	GC02P218125	0.891878	https://www.genecards.org/cgi-bin/carddisp.pl?gene=CXCR2
SLC4A1	Solute Carrier Family 4 Member 1 (Diego Blood Group)	Protein Coding	48	GC17M044786	0.891878	https://www.genecards.org/cgi-bin/carddisp.pl?gene=SLC4A1
MYH7	Myosin Heavy Chain 7	Protein Coding	47	GC14M023412	0.891878	https://www.genecards.org/cgi-bin/carddisp.pl?gene=MYH7
MUSK	Muscle Associated Receptor Tyrosine Kinase	Protein Coding	47	GC09P110668	0.891878	https://www.genecards.org/cgi-bin/carddisp.pl?gene=MUSK
CSF2RB	Colony Stimulating Factor 2 Receptor Subunit Beta	Protein Coding	47	GC22P036913	0.891878	https://www.genecards.org/cgi-bin/carddisp.pl?gene=CSF2RB
GZMB	Granzyme B	Protein Coding	46	GC14M024630	0.891878	https://www.genecards.org/cgi-bin/carddisp.pl?gene=GZMB
IRF1	Interferon Regulatory Factor 1	Protein Coding	46	GC05M132440	0.891878	https://www.genecards.org/cgi-bin/carddisp.pl?gene=IRF1
CD46	CD46 Molecule	Protein Coding	46	GC01P207752	0.891878	https://www.genecards.org/cgi-bin/carddisp.pl?gene=CD46
STAT2	Signal Transducer And Activator Of Transcription 2	Protein Coding	46	GC12M056341	0.891878	https://www.genecards.org/cgi-bin/carddisp.pl?gene=STAT2
TNFRSF13B	TNF Receptor Superfamily Member 13B	Protein Coding	46	GC17M016929	0.891878	https://www.genecards.org/cgi-bin/carddisp.pl?gene=TNFRSF13B
RYR1	Ryanodine Receptor 1	Protein Coding	46	GC19P051535	0.891878	https://www.genecards.org/cgi-bin/carddisp.pl?gene=RYR1
TLR5	Toll Like Receptor 5	Protein Coding	46	GC01M223643	0.891878	https://www.genecards.org/cgi-bin/carddisp.pl?gene=TLR5
ACTA1	Actin Alpha 1, Skeletal Muscle	Protein Coding	46	GC01M229460	0.891878	https://www.genecards.org/cgi-bin/carddisp.pl?gene=ACTA1
EIF4G1	Eukaryotic Translation Initiation Factor 4 Gamma 1	Protein Coding	46	GC03P184314	0.891878	https://www.genecards.org/cgi-bin/carddisp.pl?gene=EIF4G1
EIF2AK2	Eukaryotic Translation Initiation Factor 2 Alpha Kinase 2	Protein Coding	46	GC02M037099	0.891878	https://www.genecards.org/cgi-bin/carddisp.pl?gene=EIF2AK2
DMD	Dystrophin	Protein Coding	46	GC0XM031097	0.891878	https://www.genecards.org/cgi-bin/carddisp.pl?gene=DMD
TLR1	Toll Like Receptor 1	Protein Coding	46	GC04M038793	0.891878	https://www.genecards.org/cgi-bin/carddisp.pl?gene=TLR1
TTN	Titin	Protein Coding	46	GC02M178525	0.891878	https://www.genecards.org/cgi-bin/carddisp.pl?gene=TTN
IL1R1	Interleukin 1 Receptor Type 1	Protein Coding	45	GC02P102136	0.891878	https://www.genecards.org/cgi-bin/carddisp.pl?gene=IL1R1
NKX2-1	NK2 Homeobox 1	Protein Coding	45	GC14M036516	0.891878	https://www.genecards.org/cgi-bin/carddisp.pl?gene=NKX2-1
NPPA	Natriuretic Peptide A	Protein Coding	45	GC01M011846	0.891878	https://www.genecards.org/cgi-bin/carddisp.pl?gene=NPPA
ACHE	Acetylcholinesterase (Cartwright Blood Group)	Protein Coding	45	GC07M100889	0.891878	https://www.genecards.org/cgi-bin/carddisp.pl?gene=ACHE
PDE4A	Phosphodiesterase 4A	Protein Coding	45	GC19P010416	0.891878	https://www.genecards.org/cgi-bin/carddisp.pl?gene=PDE4A
THBD	Thrombomodulin	Protein Coding	45	GC20M023026	0.891878	https://www.genecards.org/cgi-bin/carddisp.pl?gene=THBD
LBP	Lipopolysaccharide Binding Protein	Protein Coding	44	GC20P038346	0.891878	https://www.genecards.org/cgi-bin/carddisp.pl?gene=LBP
LAMA2	Laminin Subunit Alpha 2	Protein Coding	44	GC06P128863	0.891878	https://www.genecards.org/cgi-bin/carddisp.pl?gene=LAMA2
TNFSF10	TNF Superfamily Member 10	Protein Coding	44	GC03M172505	0.891878	https://www.genecards.org/cgi-bin/carddisp.pl?gene=TNFSF10
CXCR3	C-X-C Motif Chemokine Receptor 3	Protein Coding	44	GC0XM071615	0.891878	https://www.genecards.org/cgi-bin/carddisp.pl?gene=CXCR3
CSF2RA	Colony Stimulating Factor 2 Receptor Subunit Alpha	Protein Coding	44	GC0XP001571	0.891878	https://www.genecards.org/cgi-bin/carddisp.pl?gene=CSF2RA
MECP2	Methyl-CpG Binding Protein 2	Protein Coding	44	GC0XM154021	0.891878	https://www.genecards.org/cgi-bin/carddisp.pl?gene=MECP2
RBP4	Retinol Binding Protein 4	Protein Coding	44	GC10M093591	0.891878	https://www.genecards.org/cgi-bin/carddisp.pl?gene=RBP4
PDE4B	Phosphodiesterase 4B	Protein Coding	44	GC01P065792	0.891878	https://www.genecards.org/cgi-bin/carddisp.pl?gene=PDE4B
CXADR	CXADR Ig-Like Cell Adhesion Molecule	Protein Coding	43	GC21P017513	0.891878	https://www.genecards.org/cgi-bin/carddisp.pl?gene=CXADR
TIMP1	TIMP Metallopeptidase Inhibitor 1	Protein Coding	43	GC0XP047583	0.891878	https://www.genecards.org/cgi-bin/carddisp.pl?gene=TIMP1
MYL1	Myosin Light Chain 1	Protein Coding	42	GC02M210290	0.891878	https://www.genecards.org/cgi-bin/carddisp.pl?gene=MYL1
MUC5B	Mucin 5B, Oligomeric Mucus/Gel-Forming	Protein Coding	42	GC11P001583	0.891878	https://www.genecards.org/cgi-bin/carddisp.pl?gene=MUC5B
MEGF10	Multiple EGF Like Domains 10	Protein Coding	42	GC05P127230	0.891878	https://www.genecards.org/cgi-bin/carddisp.pl?gene=MEGF10
PPBP	Pro-Platelet Basic Protein	Protein Coding	42	GC04M073986	0.891878	https://www.genecards.org/cgi-bin/carddisp.pl?gene=PPBP
CD9	CD9 Molecule	Protein Coding	42	GC12P018518	0.891878	https://www.genecards.org/cgi-bin/carddisp.pl?gene=CD9
KIR3DL1	Killer Cell Immunoglobulin Like Receptor, Three Ig Domains And Long Cytoplasmic Tail 1	Protein Coding	41	GC19P062551	0.891878	https://www.genecards.org/cgi-bin/carddisp.pl?gene=KIR3DL1
NFU1	NFU1 Iron-Sulfur Cluster Scaffold	Protein Coding	41	GC02M069395	0.891878	https://www.genecards.org/cgi-bin/carddisp.pl?gene=NFU1
MYPN	Myopalladin	Protein Coding	41	GC10P068106	0.891878	https://www.genecards.org/cgi-bin/carddisp.pl?gene=MYPN
MX1	MX Dynamin Like GTPase 1	Protein Coding	41	GC21P041420	0.891878	https://www.genecards.org/cgi-bin/carddisp.pl?gene=MX1
TRIM5	Tripartite Motif Containing 5	Protein Coding	41	GC11M006262	0.891878	https://www.genecards.org/cgi-bin/carddisp.pl?gene=TRIM5
TRIM63	Tripartite Motif Containing 63	Protein Coding	41	GC01M026062	0.891878	https://www.genecards.org/cgi-bin/carddisp.pl?gene=TRIM63
LTA	Lymphotoxin Alpha	Protein Coding	41	GC06P076862	0.891878	https://www.genecards.org/cgi-bin/carddisp.pl?gene=LTA
CD84	CD84 Molecule	Protein Coding	41	GC01M160541	0.891878	https://www.genecards.org/cgi-bin/carddisp.pl?gene=CD84
KLRK1	Killer Cell Lectin Like Receptor K1	Protein Coding	40	GC12M019788	0.891878	https://www.genecards.org/cgi-bin/carddisp.pl?gene=KLRK1
GLE1	GLE1 RNA Export Mediator	Protein Coding	40	GC09P128504	0.891878	https://www.genecards.org/cgi-bin/carddisp.pl?gene=GLE1
HCRT	Hypocretin Neuropeptide Precursor	Protein Coding	40	GC17M042185	0.891878	https://www.genecards.org/cgi-bin/carddisp.pl?gene=HCRT
IL15	Interleukin 15	Protein Coding	40	GC04P141636	0.891878	https://www.genecards.org/cgi-bin/carddisp.pl?gene=IL15
IL22RA2	Interleukin 22 Receptor Subunit Alpha 2	Protein Coding	40	GC06M137143	0.891878	https://www.genecards.org/cgi-bin/carddisp.pl?gene=IL22RA2
ISG20	Interferon Stimulated Exonuclease Gene 20	Protein Coding	40	GC15P088635	0.891878	https://www.genecards.org/cgi-bin/carddisp.pl?gene=ISG20
IVNS1ABP	Influenza Virus NS1A Binding Protein	Protein Coding	40	GC01M185306	0.891878	https://www.genecards.org/cgi-bin/carddisp.pl?gene=IVNS1ABP
RNASE3	Ribonuclease A Family Member 3	Protein Coding	40	GC14P020891	0.891878	https://www.genecards.org/cgi-bin/carddisp.pl?gene=RNASE3
SERPINB1	Serpin Family B Member 1	Protein Coding	40	GC06M002833	0.891878	https://www.genecards.org/cgi-bin/carddisp.pl?gene=SERPINB1
SP100	SP100 Nuclear Antigen	Protein Coding	40	GC02P230415	0.891878	https://www.genecards.org/cgi-bin/carddisp.pl?gene=SP100
SLPI	Secretory Leukocyte Peptidase Inhibitor	Protein Coding	40	GC20M045252	0.891878	https://www.genecards.org/cgi-bin/carddisp.pl?gene=SLPI
CSF3	Colony Stimulating Factor 3	Protein Coding	40	GC17P040015	0.891878	https://www.genecards.org/cgi-bin/carddisp.pl?gene=CSF3
SLAMF1	Signaling Lymphocytic Activation Molecule Family Member 1	Protein Coding	40	GC01M160608	0.891878	https://www.genecards.org/cgi-bin/carddisp.pl?gene=SLAMF1
SERPINA7	Serpin Family A Member 7	Protein Coding	40	GC0XM106032	0.891878	https://www.genecards.org/cgi-bin/carddisp.pl?gene=SERPINA7
NCR2	Natural Cytotoxicity Triggering Receptor 2	Protein Coding	39	GC06P077045	0.891878	https://www.genecards.org/cgi-bin/carddisp.pl?gene=NCR2
SLC52A3	Solute Carrier Family 52 Member 3	Protein Coding	38	GC20M000741	0.891878	https://www.genecards.org/cgi-bin/carddisp.pl?gene=SLC52A3
BOLA3	BolA Family Member 3	Protein Coding	38	GC02M074136	0.891878	https://www.genecards.org/cgi-bin/carddisp.pl?gene=BOLA3
LMOD3	Leiomodin 3	Protein Coding	38	GC03M069156	0.891878	https://www.genecards.org/cgi-bin/carddisp.pl?gene=LMOD3
IFNA21	Interferon Alpha 21	Protein Coding	37	GC09M021165	0.891878	https://www.genecards.org/cgi-bin/carddisp.pl?gene=IFNA21
IFNA6	Interferon Alpha 6	Protein Coding	37	GC09M021349	0.891878	https://www.genecards.org/cgi-bin/carddisp.pl?gene=IFNA6
NCR1	Natural Cytotoxicity Triggering Receptor 1	Protein Coding	37	GC19P054906	0.891878	https://www.genecards.org/cgi-bin/carddisp.pl?gene=NCR1
ACKR1	Atypical Chemokine Receptor 1 (Duffy Blood Group)	Protein Coding	37	GC01P159203	0.891878	https://www.genecards.org/cgi-bin/carddisp.pl?gene=ACKR1
HYDIN	HYDIN Axonemal Central Pair Apparatus Protein	Protein Coding	37	GC16M070905	0.891878	https://www.genecards.org/cgi-bin/carddisp.pl?gene=HYDIN
CCL22	C-C Motif Chemokine Ligand 22	Protein Coding	37	GC16P057359	0.891878	https://www.genecards.org/cgi-bin/carddisp.pl?gene=CCL22
KLHL40	Kelch Like Family Member 40	Protein Coding	36	GC03P042685	0.891878	https://www.genecards.org/cgi-bin/carddisp.pl?gene=KLHL40
IBA57	Iron-Sulfur Cluster Assembly Factor IBA57	Protein Coding	35	GC01P228165	0.891878	https://www.genecards.org/cgi-bin/carddisp.pl?gene=IBA57
IFNA4	Interferon Alpha 4	Protein Coding	34	GC09M021186	0.891878	https://www.genecards.org/cgi-bin/carddisp.pl?gene=IFNA4
IFI44L	Interferon Induced Protein 44 Like	Protein Coding	34	GC01P078619	0.891878	https://www.genecards.org/cgi-bin/carddisp.pl?gene=IFI44L
SELENON	Selenoprotein N	Protein Coding	33	GC01P025800	0.891878	https://www.genecards.org/cgi-bin/carddisp.pl?gene=SELENON
MIR122	MicroRNA 122	RNA Gene	22	GC18P058451	0.891878	https://www.genecards.org/cgi-bin/carddisp.pl?gene=MIR122
TTN-AS1	TTN Antisense RNA 1	RNA Gene	17	GC02P178521	0.891878	https://www.genecards.org/cgi-bin/carddisp.pl?gene=TTN-AS1
LINC02258	Long Intergenic Non-Protein Coding RNA 2258	RNA Gene	11	GC12P087796	0.891878	https://www.genecards.org/cgi-bin/carddisp.pl?gene=LINC02258
SKAP1-AS1	SKAP1 Antisense RNA 1	RNA Gene	10	GC17P051078	0.891878	https://www.genecards.org/cgi-bin/carddisp.pl?gene=SKAP1-AS1
HMOX2	Heme Oxygenase 2	Protein Coding	46	GC16P004474	0.876191	https://www.genecards.org/cgi-bin/carddisp.pl?gene=HMOX2
PRKCSH	Protein Kinase C Substrate 80K-H	Protein Coding	44	GC19P011435	0.876191	https://www.genecards.org/cgi-bin/carddisp.pl?gene=PRKCSH
CPD	Carboxypeptidase D	Protein Coding	43	GC17P030378	0.876191	https://www.genecards.org/cgi-bin/carddisp.pl?gene=CPD
CANX	Calnexin	Protein Coding	43	GC05P179678	0.876191	https://www.genecards.org/cgi-bin/carddisp.pl?gene=CANX
ERLIN2	ER Lipid Raft Associated 2	Protein Coding	41	GC08P037736	0.876191	https://www.genecards.org/cgi-bin/carddisp.pl?gene=ERLIN2
HNRNPDL	Heterogeneous Nuclear Ribonucleoprotein D Like	Protein Coding	40	GC04M082422	0.876191	https://www.genecards.org/cgi-bin/carddisp.pl?gene=HNRNPDL
PHB2	Prohibitin 2	Protein Coding	40	GC12M006965	0.876191	https://www.genecards.org/cgi-bin/carddisp.pl?gene=PHB2
XPO5	Exportin 5	Protein Coding	40	GC06M043522	0.876191	https://www.genecards.org/cgi-bin/carddisp.pl?gene=XPO5
XPOT	Exportin For TRNA	Protein Coding	40	GC12P064404	0.876191	https://www.genecards.org/cgi-bin/carddisp.pl?gene=XPOT
GOLGA5	Golgin A5	Protein Coding	38	GC14P092794	0.876191	https://www.genecards.org/cgi-bin/carddisp.pl?gene=GOLGA5
STOML2	Stomatin Like 2	Protein Coding	38	GC09M035099	0.876191	https://www.genecards.org/cgi-bin/carddisp.pl?gene=STOML2
CNNM3	Cyclin And CBS Domain Divalent Metal Cation Transport Mediator 3	Protein Coding	38	GC02P096815	0.876191	https://www.genecards.org/cgi-bin/carddisp.pl?gene=CNNM3
FAF2	Fas Associated Factor Family Member 2	Protein Coding	37	GC05P176447	0.876191	https://www.genecards.org/cgi-bin/carddisp.pl?gene=FAF2
ATP5PD	ATP Synthase Peripheral Stalk Subunit D	Protein Coding	32	GC17M075039	0.876191	https://www.genecards.org/cgi-bin/carddisp.pl?gene=ATP5PD
SRPRA	SRP Receptor Subunit Alpha	Protein Coding	30	GC11M126255	0.876191	https://www.genecards.org/cgi-bin/carddisp.pl?gene=SRPRA
ATP5PB	ATP Synthase Peripheral Stalk-Membrane Subunit B	Protein Coding	29	GC01P111449	0.876191	https://www.genecards.org/cgi-bin/carddisp.pl?gene=ATP5PB
SNX17	Sorting Nexin 17	Protein Coding	36	GC02P027370	0.862919	https://www.genecards.org/cgi-bin/carddisp.pl?gene=SNX17
LOC102724971	Putative V-Set And Immunoglobulin Domain-Containing-Like Protein IGHV4OR15-8	Protein Coding	4	GC15M021742	0.862919	https://www.genecards.org/cgi-bin/carddisp.pl?gene=LOC102724971
TP53	Tumor Protein P53	Protein Coding	51	GC17M007661	0.860101	https://www.genecards.org/cgi-bin/carddisp.pl?gene=TP53
GSK3B	Glycogen Synthase Kinase 3 Beta	Protein Coding	48	GC03M119821	0.860101	https://www.genecards.org/cgi-bin/carddisp.pl?gene=GSK3B
SPTLC2	Serine Palmitoyltransferase Long Chain Base Subunit 2	Protein Coding	47	GC14M077505	0.860101	https://www.genecards.org/cgi-bin/carddisp.pl?gene=SPTLC2
IGF2R	Insulin Like Growth Factor 2 Receptor	Protein Coding	46	GC06P159969	0.860101	https://www.genecards.org/cgi-bin/carddisp.pl?gene=IGF2R
FANCD2	FA Complementation Group D2	Protein Coding	46	GC03P010026	0.860101	https://www.genecards.org/cgi-bin/carddisp.pl?gene=FANCD2
SRPK1	SRSF Protein Kinase 1	Protein Coding	45	GC06M061442	0.860101	https://www.genecards.org/cgi-bin/carddisp.pl?gene=SRPK1
LMAN1	Lectin, Mannose Binding 1	Protein Coding	45	GC18M059327	0.860101	https://www.genecards.org/cgi-bin/carddisp.pl?gene=LMAN1
FADS2	Fatty Acid Desaturase 2	Protein Coding	44	GC11P061792	0.860101	https://www.genecards.org/cgi-bin/carddisp.pl?gene=FADS2
NSF	N-Ethylmaleimide Sensitive Factor, Vesicle Fusing ATPase	Protein Coding	44	GC17P046590	0.860101	https://www.genecards.org/cgi-bin/carddisp.pl?gene=NSF
ATP2B4	ATPase Plasma Membrane Ca2+ Transporting 4	Protein Coding	44	GC01P203626	0.860101	https://www.genecards.org/cgi-bin/carddisp.pl?gene=ATP2B4
BAG3	BAG Cochaperone 3	Protein Coding	43	GC10P119651	0.860101	https://www.genecards.org/cgi-bin/carddisp.pl?gene=BAG3
SLC39A14	Solute Carrier Family 39 Member 14	Protein Coding	43	GC08P022367	0.860101	https://www.genecards.org/cgi-bin/carddisp.pl?gene=SLC39A14
STT3B	STT3 Oligosaccharyltransferase Complex Catalytic Subunit B	Protein Coding	42	GC03P031550	0.860101	https://www.genecards.org/cgi-bin/carddisp.pl?gene=STT3B
DNAJB1	DnaJ Heat Shock Protein Family (Hsp40) Member B1	Protein Coding	42	GC19M014514	0.860101	https://www.genecards.org/cgi-bin/carddisp.pl?gene=DNAJB1
CHPT1	Choline Phosphotransferase 1	Protein Coding	40	GC12P101696	0.860101	https://www.genecards.org/cgi-bin/carddisp.pl?gene=CHPT1
LMO7	LIM Domain 7	Protein Coding	40	GC13P075620	0.860101	https://www.genecards.org/cgi-bin/carddisp.pl?gene=LMO7
MTX1	Metaxin 1	Protein Coding	39	GC01P155208	0.860101	https://www.genecards.org/cgi-bin/carddisp.pl?gene=MTX1
STXBP3	Syntaxin Binding Protein 3	Protein Coding	39	GC01P108746	0.860101	https://www.genecards.org/cgi-bin/carddisp.pl?gene=STXBP3
BAG5	BAG Cochaperone 5	Protein Coding	39	GC14M103556	0.860101	https://www.genecards.org/cgi-bin/carddisp.pl?gene=BAG5
PIGS	Phosphatidylinositol Glycan Anchor Biosynthesis Class S	Protein Coding	39	GC17M028553	0.860101	https://www.genecards.org/cgi-bin/carddisp.pl?gene=PIGS
SCFD1	Sec1 Family Domain Containing 1	Protein Coding	38	GC14P030622	0.860101	https://www.genecards.org/cgi-bin/carddisp.pl?gene=SCFD1
SARM1	Sterile Alpha And TIR Motif Containing 1	Protein Coding	38	GC17P028364	0.860101	https://www.genecards.org/cgi-bin/carddisp.pl?gene=SARM1
BAG6	BAG Cochaperone 6	Protein Coding	37	GC06M031639	0.860101	https://www.genecards.org/cgi-bin/carddisp.pl?gene=BAG6
STK11IP	Serine/Threonine Kinase 11 Interacting Protein	Protein Coding	35	GC02P219597	0.860101	https://www.genecards.org/cgi-bin/carddisp.pl?gene=STK11IP
TRAPPC5	Trafficking Protein Particle Complex Subunit 5	Protein Coding	35	GC19P007680	0.860101	https://www.genecards.org/cgi-bin/carddisp.pl?gene=TRAPPC5
TMEM214	Transmembrane Protein 214	Protein Coding	34	GC02P027032	0.860101	https://www.genecards.org/cgi-bin/carddisp.pl?gene=TMEM214
TOR1AIP2	Torsin 1A Interacting Protein 2	Protein Coding	34	GC01M183159	0.860101	https://www.genecards.org/cgi-bin/carddisp.pl?gene=TOR1AIP2
TM9SF1	Transmembrane 9 Superfamily Member 1	Protein Coding	34	GC14M024189	0.860101	https://www.genecards.org/cgi-bin/carddisp.pl?gene=TM9SF1
B4GAT1	Beta-1,4-Glucuronyltransferase 1	Protein Coding	34	GC11M066345	0.860101	https://www.genecards.org/cgi-bin/carddisp.pl?gene=B4GAT1
LTN1	Listerin E3 Ubiquitin Protein Ligase 1	Protein Coding	34	GC21M028928	0.860101	https://www.genecards.org/cgi-bin/carddisp.pl?gene=LTN1
TTI1	TELO2 Interacting Protein 1	Protein Coding	34	GC20M037983	0.860101	https://www.genecards.org/cgi-bin/carddisp.pl?gene=TTI1
EMC2	ER Membrane Protein Complex Subunit 2	Protein Coding	32	GC08P108443	0.860101	https://www.genecards.org/cgi-bin/carddisp.pl?gene=EMC2
MACO1	Macoilin 1	Protein Coding	28	GC01P025430	0.860101	https://www.genecards.org/cgi-bin/carddisp.pl?gene=MACO1
GOT1	Glutamic-Oxaloacetic Transaminase 1	Protein Coding	45	GC10M099396	0.853151	https://www.genecards.org/cgi-bin/carddisp.pl?gene=GOT1
DNM2	Dynamin 2	Protein Coding	49	GC19P010718	0.821117	https://www.genecards.org/cgi-bin/carddisp.pl?gene=DNM2
ATP6V1B2	ATPase H+ Transporting V1 Subunit B2	Protein Coding	46	GC08P020197	0.821117	https://www.genecards.org/cgi-bin/carddisp.pl?gene=ATP6V1B2
CLCN7	Chloride Voltage-Gated Channel 7	Protein Coding	45	GC16M001444	0.821117	https://www.genecards.org/cgi-bin/carddisp.pl?gene=CLCN7
BAG2	BAG Cochaperone 2	Protein Coding	39	GC06P057172	0.821117	https://www.genecards.org/cgi-bin/carddisp.pl?gene=BAG2
TMEM199	Transmembrane Protein 199	Protein Coding	34	GC17P049677	0.821117	https://www.genecards.org/cgi-bin/carddisp.pl?gene=TMEM199
METTL3	Methyltransferase 3, N6-Adenosine-Methyltransferase Complex Catalytic Subunit	Protein Coding	40	GC14M021498	0.82106	https://www.genecards.org/cgi-bin/carddisp.pl?gene=METTL3
MIR2392	MicroRNA 2392	RNA Gene	11	GC14P109063	0.815185	https://www.genecards.org/cgi-bin/carddisp.pl?gene=MIR2392
MTOR	Mechanistic Target Of Rapamycin Kinase	Protein Coding	52	GC01M011106	0.79001	https://www.genecards.org/cgi-bin/carddisp.pl?gene=MTOR
HDAC2	Histone Deacetylase 2	Protein Coding	50	GC06M113933	0.79001	https://www.genecards.org/cgi-bin/carddisp.pl?gene=HDAC2
APP	Amyloid Beta Precursor Protein	Protein Coding	50	GC21M025880	0.79001	https://www.genecards.org/cgi-bin/carddisp.pl?gene=APP
PRKACA	Protein Kinase CAMP-Activated Catalytic Subunit Alpha	Protein Coding	50	GC19M014403	0.79001	https://www.genecards.org/cgi-bin/carddisp.pl?gene=PRKACA
PLAT	Plasminogen Activator, Tissue Type	Protein Coding	48	GC08M042174	0.79001	https://www.genecards.org/cgi-bin/carddisp.pl?gene=PLAT
GGCX	Gamma-Glutamyl Carboxylase	Protein Coding	47	GC02M085544	0.79001	https://www.genecards.org/cgi-bin/carddisp.pl?gene=GGCX
IDE	Insulin Degrading Enzyme	Protein Coding	47	GC10M092451	0.79001	https://www.genecards.org/cgi-bin/carddisp.pl?gene=IDE
CSNK2B	Casein Kinase 2 Beta	Protein Coding	47	GC06P076868	0.79001	https://www.genecards.org/cgi-bin/carddisp.pl?gene=CSNK2B
FBLN5	Fibulin 5	Protein Coding	46	GC14M091869	0.79001	https://www.genecards.org/cgi-bin/carddisp.pl?gene=FBLN5
FBN1	Fibrillin 1	Protein Coding	46	GC15M048408	0.79001	https://www.genecards.org/cgi-bin/carddisp.pl?gene=FBN1
TCF12	Transcription Factor 12	Protein Coding	46	GC15P056918	0.79001	https://www.genecards.org/cgi-bin/carddisp.pl?gene=TCF12
CIT	Citron Rho-Interacting Serine/Threonine Kinase	Protein Coding	46	GC12M119650	0.79001	https://www.genecards.org/cgi-bin/carddisp.pl?gene=CIT
DDR1	Discoidin Domain Receptor Tyrosine Kinase 1	Protein Coding	46	GC06P076844	0.79001	https://www.genecards.org/cgi-bin/carddisp.pl?gene=DDR1
GPX1	Glutathione Peroxidase 1	Protein Coding	46	GC03M050895	0.79001	https://www.genecards.org/cgi-bin/carddisp.pl?gene=GPX1
LOX	Lysyl Oxidase	Protein Coding	46	GC05M122063	0.79001	https://www.genecards.org/cgi-bin/carddisp.pl?gene=LOX
GFER	Growth Factor, Augmenter Of Liver Regeneration	Protein Coding	45	GC16P001984	0.79001	https://www.genecards.org/cgi-bin/carddisp.pl?gene=GFER
POLA1	DNA Polymerase Alpha 1, Catalytic Subunit	Protein Coding	45	GC0XP024693	0.79001	https://www.genecards.org/cgi-bin/carddisp.pl?gene=POLA1
BCKDK	Branched Chain Keto Acid Dehydrogenase Kinase	Protein Coding	45	GC16P039475	0.79001	https://www.genecards.org/cgi-bin/carddisp.pl?gene=BCKDK
ACADM	Acyl-CoA Dehydrogenase Medium Chain	Protein Coding	45	GC01P075724	0.79001	https://www.genecards.org/cgi-bin/carddisp.pl?gene=ACADM
PRKAR2A	Protein Kinase CAMP-Dependent Type II Regulatory Subunit Alpha	Protein Coding	45	GC03M048744	0.79001	https://www.genecards.org/cgi-bin/carddisp.pl?gene=PRKAR2A
AKAP9	A-Kinase Anchoring Protein 9	Protein Coding	44	GC07P091940	0.79001	https://www.genecards.org/cgi-bin/carddisp.pl?gene=AKAP9
COL6A1	Collagen Type VI Alpha 1 Chain	Protein Coding	44	GC21P045981	0.79001	https://www.genecards.org/cgi-bin/carddisp.pl?gene=COL6A1
BRD2	Bromodomain Containing 2	Protein Coding	44	GC06P076900	0.79001	https://www.genecards.org/cgi-bin/carddisp.pl?gene=BRD2
LTF	Lactotransferrin	Protein Coding	44	GC03M046435	0.79001	https://www.genecards.org/cgi-bin/carddisp.pl?gene=LTF
PRKAR2B	Protein Kinase CAMP-Dependent Type II Regulatory Subunit Beta	Protein Coding	44	GC07P107044	0.79001	https://www.genecards.org/cgi-bin/carddisp.pl?gene=PRKAR2B
FBN2	Fibrillin 2	Protein Coding	42	GC05M128257	0.79001	https://www.genecards.org/cgi-bin/carddisp.pl?gene=FBN2
SEPSECS	Sep (O-Phosphoserine) TRNA:Sec (Selenocysteine) TRNA Synthase	Protein Coding	42	GC04M025121	0.79001	https://www.genecards.org/cgi-bin/carddisp.pl?gene=SEPSECS
SLC25A21	Solute Carrier Family 25 Member 21	Protein Coding	42	GC14M036677	0.79001	https://www.genecards.org/cgi-bin/carddisp.pl?gene=SLC25A21
SLC30A9	Solute Carrier Family 30 Member 9	Protein Coding	42	GC04P041992	0.79001	https://www.genecards.org/cgi-bin/carddisp.pl?gene=SLC30A9
PRIM1	DNA Primase Subunit 1	Protein Coding	42	GC12M056731	0.79001	https://www.genecards.org/cgi-bin/carddisp.pl?gene=PRIM1
PABPC1	Poly(A) Binding Protein Cytoplasmic 1	Protein Coding	42	GC08M100685	0.79001	https://www.genecards.org/cgi-bin/carddisp.pl?gene=PABPC1
LARP7	La Ribonucleoprotein 7, Transcriptional Regulator	Protein Coding	41	GC04P112636	0.79001	https://www.genecards.org/cgi-bin/carddisp.pl?gene=LARP7
GORASP1	Golgi Reassembly Stacking Protein 1	Protein Coding	41	GC03M039096	0.79001	https://www.genecards.org/cgi-bin/carddisp.pl?gene=GORASP1
SMOC1	SPARC Related Modular Calcium Binding 1	Protein Coding	41	GC14P069854	0.79001	https://www.genecards.org/cgi-bin/carddisp.pl?gene=SMOC1
EXOSC2	Exosome Component 2	Protein Coding	41	GC09P130693	0.79001	https://www.genecards.org/cgi-bin/carddisp.pl?gene=EXOSC2
EXOSC3	Exosome Component 3	Protein Coding	41	GC09M037772	0.79001	https://www.genecards.org/cgi-bin/carddisp.pl?gene=EXOSC3
DNAJC19	DnaJ Heat Shock Protein Family (Hsp40) Member C19	Protein Coding	41	GC03M180983	0.79001	https://www.genecards.org/cgi-bin/carddisp.pl?gene=DNAJC19
CYB5B	Cytochrome B5 Type B	Protein Coding	41	GC16P069450	0.79001	https://www.genecards.org/cgi-bin/carddisp.pl?gene=CYB5B
CDK5RAP2	CDK5 Regulatory Subunit Associated Protein 2	Protein Coding	41	GC09M120388	0.79001	https://www.genecards.org/cgi-bin/carddisp.pl?gene=CDK5RAP2
SLC44A2	Solute Carrier Family 44 Member 2	Protein Coding	41	GC19P010602	0.79001	https://www.genecards.org/cgi-bin/carddisp.pl?gene=SLC44A2
GNG5	G Protein Subunit Gamma 5	Protein Coding	40	GC01M084498	0.79001	https://www.genecards.org/cgi-bin/carddisp.pl?gene=GNG5
POLA2	DNA Polymerase Alpha 2, Accessory Subunit	Protein Coding	40	GC11P068976	0.79001	https://www.genecards.org/cgi-bin/carddisp.pl?gene=POLA2
SRP72	Signal Recognition Particle 72	Protein Coding	40	GC04P056466	0.79001	https://www.genecards.org/cgi-bin/carddisp.pl?gene=SRP72
EXOSC8	Exosome Component 8	Protein Coding	40	GC13P036998	0.79001	https://www.genecards.org/cgi-bin/carddisp.pl?gene=EXOSC8
CWC27	CWC27 Spliceosome Associated Cyclophilin	Protein Coding	40	GC05P064768	0.79001	https://www.genecards.org/cgi-bin/carddisp.pl?gene=CWC27
AATF	Apoptosis Antagonizing Transcription Factor	Protein Coding	40	GC17P036948	0.79001	https://www.genecards.org/cgi-bin/carddisp.pl?gene=AATF
RNF41	Ring Finger Protein 41	Protein Coding	40	GC12M056202	0.79001	https://www.genecards.org/cgi-bin/carddisp.pl?gene=RNF41
PRIM2	DNA Primase Subunit 2	Protein Coding	40	GC06P057314	0.79001	https://www.genecards.org/cgi-bin/carddisp.pl?gene=PRIM2
HOOK1	Hook Microtubule Tethering Protein 1	Protein Coding	39	GC01P059814	0.79001	https://www.genecards.org/cgi-bin/carddisp.pl?gene=HOOK1
PSMD8	Proteasome 26S Subunit, Non-ATPase 8	Protein Coding	39	GC19P038374	0.79001	https://www.genecards.org/cgi-bin/carddisp.pl?gene=PSMD8
ERGIC1	Endoplasmic Reticulum-Golgi Intermediate Compartment 1	Protein Coding	39	GC05P172834	0.79001	https://www.genecards.org/cgi-bin/carddisp.pl?gene=ERGIC1
MAT2B	Methionine Adenosyltransferase 2B	Protein Coding	39	GC05P163504	0.79001	https://www.genecards.org/cgi-bin/carddisp.pl?gene=MAT2B
BZW2	Basic Leucine Zipper And W2 Domains 2	Protein Coding	38	GC07P016646	0.79001	https://www.genecards.org/cgi-bin/carddisp.pl?gene=BZW2
NUP88	Nucleoporin 88	Protein Coding	38	GC17M005997	0.79001	https://www.genecards.org/cgi-bin/carddisp.pl?gene=NUP88
MRPS25	Mitochondrial Ribosomal Protein S25	Protein Coding	38	GC03M019719	0.79001	https://www.genecards.org/cgi-bin/carddisp.pl?gene=MRPS25
SNIP1	Smad Nuclear Interacting Protein 1	Protein Coding	38	GC01M037534	0.79001	https://www.genecards.org/cgi-bin/carddisp.pl?gene=SNIP1
STOM	Stomatin	Protein Coding	38	GC09M121338	0.79001	https://www.genecards.org/cgi-bin/carddisp.pl?gene=STOM
SRP19	Signal Recognition Particle 19	Protein Coding	38	GC05P112862	0.79001	https://www.genecards.org/cgi-bin/carddisp.pl?gene=SRP19
EXOSC5	Exosome Component 5	Protein Coding	38	GC19M061895	0.79001	https://www.genecards.org/cgi-bin/carddisp.pl?gene=EXOSC5
DDX10	DEAD-Box Helicase 10	Protein Coding	38	GC11P108569	0.79001	https://www.genecards.org/cgi-bin/carddisp.pl?gene=DDX10
CRTC3	CREB Regulated Transcription Coactivator 3	Protein Coding	38	GC15P090529	0.79001	https://www.genecards.org/cgi-bin/carddisp.pl?gene=CRTC3
DDX21	DExD-Box Helicase 21	Protein Coding	38	GC10P068956	0.79001	https://www.genecards.org/cgi-bin/carddisp.pl?gene=DDX21
INHBE	Inhibin Subunit Beta E	Protein Coding	38	GC12P057452	0.79001	https://www.genecards.org/cgi-bin/carddisp.pl?gene=INHBE
REEP6	Receptor Accessory Protein 6	Protein Coding	38	GC19P001491	0.79001	https://www.genecards.org/cgi-bin/carddisp.pl?gene=REEP6
NINL	Ninein Like	Protein Coding	37	GC20M025452	0.79001	https://www.genecards.org/cgi-bin/carddisp.pl?gene=NINL
FKBP7	FKBP Prolyl Isomerase 7	Protein Coding	37	GC02M178463	0.79001	https://www.genecards.org/cgi-bin/carddisp.pl?gene=FKBP7
JAKMIP1	Janus Kinase And Microtubule Interacting Protein 1	Protein Coding	37	GC04M006026	0.79001	https://www.genecards.org/cgi-bin/carddisp.pl?gene=JAKMIP1
TUBGCP3	Tubulin Gamma Complex Associated Protein 3	Protein Coding	37	GC13M112485	0.79001	https://www.genecards.org/cgi-bin/carddisp.pl?gene=TUBGCP3
TIMM9	Translocase Of Inner Mitochondrial Membrane 9	Protein Coding	37	GC14M058408	0.79001	https://www.genecards.org/cgi-bin/carddisp.pl?gene=TIMM9
TBCA	Tubulin Folding Cofactor A	Protein Coding	37	GC05M077691	0.79001	https://www.genecards.org/cgi-bin/carddisp.pl?gene=TBCA
CEP68	Centrosomal Protein 68	Protein Coding	37	GC02P065056	0.79001	https://www.genecards.org/cgi-bin/carddisp.pl?gene=CEP68
NUTF2	Nuclear Transport Factor 2	Protein Coding	37	GC16P067846	0.79001	https://www.genecards.org/cgi-bin/carddisp.pl?gene=NUTF2
PLEKHA5	Pleckstrin Homology Domain Containing A5	Protein Coding	37	GC12P019129	0.79001	https://www.genecards.org/cgi-bin/carddisp.pl?gene=PLEKHA5
GCC1	GRIP And Coiled-Coil Domain Containing 1	Protein Coding	36	GC07M127580	0.79001	https://www.genecards.org/cgi-bin/carddisp.pl?gene=GCC1
MPHOSPH10	M-Phase Phosphoprotein 10	Protein Coding	36	GC02P071130	0.79001	https://www.genecards.org/cgi-bin/carddisp.pl?gene=MPHOSPH10
NSD2	Nuclear Receptor Binding SET Domain Protein 2	Protein Coding	36	GC04P001872	0.79001	https://www.genecards.org/cgi-bin/carddisp.pl?gene=NSD2
MRPS2	Mitochondrial Ribosomal Protein S2	Protein Coding	36	GC09P135499	0.79001	https://www.genecards.org/cgi-bin/carddisp.pl?gene=MRPS2
MRPS27	Mitochondrial Ribosomal Protein S27	Protein Coding	36	GC05M072219	0.79001	https://www.genecards.org/cgi-bin/carddisp.pl?gene=MRPS27
THTPA	Thiamine Triphosphatase	Protein Coding	36	GC14P030869	0.79001	https://www.genecards.org/cgi-bin/carddisp.pl?gene=THTPA
TIMM10	Translocase Of Inner Mitochondrial Membrane 10	Protein Coding	36	GC11M084395	0.79001	https://www.genecards.org/cgi-bin/carddisp.pl?gene=TIMM10
SBNO1	Strawberry Notch Homolog 1	Protein Coding	36	GC12M123289	0.79001	https://www.genecards.org/cgi-bin/carddisp.pl?gene=SBNO1
SLU7	SLU7 Homolog, Splicing Factor	Protein Coding	36	GC05M160401	0.79001	https://www.genecards.org/cgi-bin/carddisp.pl?gene=SLU7
PLEKHF2	Pleckstrin Homology And FYVE Domain Containing 2	Protein Coding	36	GC08P095133	0.79001	https://www.genecards.org/cgi-bin/carddisp.pl?gene=PLEKHF2
ZC3H7A	Zinc Finger CCCH-Type Containing 7A	Protein Coding	36	GC16M011750	0.79001	https://www.genecards.org/cgi-bin/carddisp.pl?gene=ZC3H7A
ZNF318	Zinc Finger Protein 318	Protein Coding	36	GC06M061537	0.79001	https://www.genecards.org/cgi-bin/carddisp.pl?gene=ZNF318
AAR2	AAR2 Splicing Factor	Protein Coding	35	GC20P036236	0.79001	https://www.genecards.org/cgi-bin/carddisp.pl?gene=AAR2
MRPS5	Mitochondrial Ribosomal Protein S5	Protein Coding	35	GC02M097688	0.79001	https://www.genecards.org/cgi-bin/carddisp.pl?gene=MRPS5
DCAKD	Dephospho-CoA Kinase Domain Containing	Protein Coding	35	GC17M045023	0.79001	https://www.genecards.org/cgi-bin/carddisp.pl?gene=DCAKD
DCAF7	DDB1 And CUL4 Associated Factor 7	Protein Coding	35	GC17P063550	0.79001	https://www.genecards.org/cgi-bin/carddisp.pl?gene=DCAF7
USP54	Ubiquitin Specific Peptidase 54	Protein Coding	35	GC10M073497	0.79001	https://www.genecards.org/cgi-bin/carddisp.pl?gene=USP54
TYSND1	Trypsin Like Peroxisomal Matrix Peptidase 1	Protein Coding	35	GC10M070137	0.79001	https://www.genecards.org/cgi-bin/carddisp.pl?gene=TYSND1
NOL10	Nucleolar Protein 10	Protein Coding	34	GC02M010662	0.79001	https://www.genecards.org/cgi-bin/carddisp.pl?gene=NOL10
HSBP1	Heat Shock Factor Binding Protein 1	Protein Coding	34	GC16P083719	0.79001	https://www.genecards.org/cgi-bin/carddisp.pl?gene=HSBP1
IFNL3	Interferon Lambda 3	Protein Coding	34	GC19M039243	0.79001	https://www.genecards.org/cgi-bin/carddisp.pl?gene=IFNL3
PDZD11	PDZ Domain Containing 11	Protein Coding	34	GC0XM070286	0.79001	https://www.genecards.org/cgi-bin/carddisp.pl?gene=PDZD11
TM2D3	TM2 Domain Containing 3	Protein Coding	34	GC15M101621	0.79001	https://www.genecards.org/cgi-bin/carddisp.pl?gene=TM2D3
TBKBP1	TBK1 Binding Protein 1	Protein Coding	34	GC17P047694	0.79001	https://www.genecards.org/cgi-bin/carddisp.pl?gene=TBKBP1
CEP112	Centrosomal Protein 112	Protein Coding	34	GC17M065635	0.79001	https://www.genecards.org/cgi-bin/carddisp.pl?gene=CEP112
CEP350	Centrosomal Protein 350	Protein Coding	34	GC01P179955	0.79001	https://www.genecards.org/cgi-bin/carddisp.pl?gene=CEP350
MIPOL1	Mirror-Image Polydactyly 1	Protein Coding	34	GC14P037197	0.79001	https://www.genecards.org/cgi-bin/carddisp.pl?gene=MIPOL1
YIF1A	Yip1 Interacting Factor Homolog A, Membrane Trafficking Protein	Protein Coding	34	GC11M084735	0.79001	https://www.genecards.org/cgi-bin/carddisp.pl?gene=YIF1A
FOXRED2	FAD Dependent Oxidoreductase Domain Containing 2	Protein Coding	33	GC22M036487	0.79001	https://www.genecards.org/cgi-bin/carddisp.pl?gene=FOXRED2
SAAL1	Serum Amyloid A Like 1	Protein Coding	33	GC11M018069	0.79001	https://www.genecards.org/cgi-bin/carddisp.pl?gene=SAAL1
CLIP4	CAP-Gly Domain Containing Linker Protein Family Member 4	Protein Coding	33	GC02P029097	0.79001	https://www.genecards.org/cgi-bin/carddisp.pl?gene=CLIP4
MAP7D1	MAP7 Domain Containing 1	Protein Coding	33	GC01P036155	0.79001	https://www.genecards.org/cgi-bin/carddisp.pl?gene=MAP7D1
MEPCE	Methylphosphate Capping Enzyme	Protein Coding	33	GC07P100428	0.79001	https://www.genecards.org/cgi-bin/carddisp.pl?gene=MEPCE
NGDN	Neuroguidin	Protein Coding	32	GC14P023469	0.79001	https://www.genecards.org/cgi-bin/carddisp.pl?gene=NGDN
NAT14	N-Acetyltransferase 14 (Putative)	Protein Coding	32	GC19P062582	0.79001	https://www.genecards.org/cgi-bin/carddisp.pl?gene=NAT14
ELOC	Elongin C	Protein Coding	32	GC08M073939	0.79001	https://www.genecards.org/cgi-bin/carddisp.pl?gene=ELOC
FASTKD5	FAST Kinase Domains 5	Protein Coding	32	GC20M003276	0.79001	https://www.genecards.org/cgi-bin/carddisp.pl?gene=FASTKD5
HEATR3	HEAT Repeat Containing 3	Protein Coding	32	GC16P050065	0.79001	https://www.genecards.org/cgi-bin/carddisp.pl?gene=HEATR3
RBM41	RNA Binding Motif Protein 41	Protein Coding	32	GC0XM107052	0.79001	https://www.genecards.org/cgi-bin/carddisp.pl?gene=RBM41
PUSL1	Pseudouridine Synthase Like 1	Protein Coding	32	GC01P001308	0.79001	https://www.genecards.org/cgi-bin/carddisp.pl?gene=PUSL1
ZC3H18	Zinc Finger CCCH-Type Containing 18	Protein Coding	32	GC16P088570	0.79001	https://www.genecards.org/cgi-bin/carddisp.pl?gene=ZC3H18
TLE5	TLE Family Member 5, Transcriptional Modulator	Protein Coding	31	GC19M004501	0.79001	https://www.genecards.org/cgi-bin/carddisp.pl?gene=TLE5
CEP43	Centrosomal Protein 43	Protein Coding	30	GC06P167001	0.79001	https://www.genecards.org/cgi-bin/carddisp.pl?gene=CEP43
CISD3	CDGSH Iron Sulfur Domain 3	Protein Coding	30	GC17P038730	0.79001	https://www.genecards.org/cgi-bin/carddisp.pl?gene=CISD3
C1orf50	Chromosome 1 Open Reading Frame 50	Protein Coding	29	GC01P042768	0.79001	https://www.genecards.org/cgi-bin/carddisp.pl?gene=C1orf50
POGLUT2	Protein O-Glucosyltransferase 2	Protein Coding	26	GC13M102785	0.79001	https://www.genecards.org/cgi-bin/carddisp.pl?gene=POGLUT2
ITGB2	Integrin Subunit Beta 2	Protein Coding	49	GC21M044885	0.774875	https://www.genecards.org/cgi-bin/carddisp.pl?gene=ITGB2
AGTR1	Angiotensin II Receptor Type 1	Protein Coding	49	GC03P148697	0.774875	https://www.genecards.org/cgi-bin/carddisp.pl?gene=AGTR1
NPC1	NPC Intracellular Cholesterol Transporter 1	Protein Coding	48	GC18M023506	0.774875	https://www.genecards.org/cgi-bin/carddisp.pl?gene=NPC1
PIKFYVE	Phosphoinositide Kinase, FYVE-Type Zinc Finger Containing	Protein Coding	47	GC02P208266	0.774875	https://www.genecards.org/cgi-bin/carddisp.pl?gene=PIKFYVE
MKI67	Marker Of Proliferation Ki-67	Protein Coding	44	GC10M128096	0.774875	https://www.genecards.org/cgi-bin/carddisp.pl?gene=MKI67
TJP1	Tight Junction Protein 1	Protein Coding	43	GC15M029699	0.774875	https://www.genecards.org/cgi-bin/carddisp.pl?gene=TJP1
MAP3K7	Mitogen-Activated Protein Kinase Kinase Kinase 7	Protein Coding	50	GC06M090513	0.755665	https://www.genecards.org/cgi-bin/carddisp.pl?gene=MAP3K7
CSNK1A1	Casein Kinase 1 Alpha 1	Protein Coding	48	GC05M149492	0.755665	https://www.genecards.org/cgi-bin/carddisp.pl?gene=CSNK1A1
IKBKG	Inhibitor Of Nuclear Factor Kappa B Kinase Regulatory Subunit Gamma	Protein Coding	47	GC0XP154541	0.755665	https://www.genecards.org/cgi-bin/carddisp.pl?gene=IKBKG
SOAT1	Sterol O-Acyltransferase 1	Protein Coding	44	GC01P179262	0.755665	https://www.genecards.org/cgi-bin/carddisp.pl?gene=SOAT1
CGAS	Cyclic GMP-AMP Synthase	Protein Coding	29	GC06M073414	0.755665	https://www.genecards.org/cgi-bin/carddisp.pl?gene=CGAS
CEP192-DT	CEP192 Divergent Transcript	RNA Gene	9	GC18M023381	0.755665	https://www.genecards.org/cgi-bin/carddisp.pl?gene=CEP192-DT
CCR4	C-C Motif Chemokine Receptor 4	Protein Coding	44	GC03P032951	0.740088	https://www.genecards.org/cgi-bin/carddisp.pl?gene=CCR4
PCM1	Pericentriolar Material 1	Protein Coding	42	GC08P017922	0.740088	https://www.genecards.org/cgi-bin/carddisp.pl?gene=PCM1
RCHY1	Ring Finger And CHY Zinc Finger Domain Containing 1	Protein Coding	39	GC04M075479	0.740088	https://www.genecards.org/cgi-bin/carddisp.pl?gene=RCHY1
TRMT2A	TRNA Methyltransferase 2 Homolog A	Protein Coding	38	GC22M020099	0.740088	https://www.genecards.org/cgi-bin/carddisp.pl?gene=TRMT2A
MKRN2	Makorin Ring Finger Protein 2	Protein Coding	38	GC03P012561	0.740088	https://www.genecards.org/cgi-bin/carddisp.pl?gene=MKRN2
XPO4	Exportin 4	Protein Coding	38	GC13M020777	0.740088	https://www.genecards.org/cgi-bin/carddisp.pl?gene=XPO4
TBC1D15	TBC1 Domain Family Member 15	Protein Coding	37	GC12P071839	0.740088	https://www.genecards.org/cgi-bin/carddisp.pl?gene=TBC1D15
ASCC3	Activating Signal Cointegrator 1 Complex Subunit 3	Protein Coding	37	GC06M100508	0.740088	https://www.genecards.org/cgi-bin/carddisp.pl?gene=ASCC3
DNAJB4	DnaJ Heat Shock Protein Family (Hsp40) Member B4	Protein Coding	36	GC01P077979	0.740088	https://www.genecards.org/cgi-bin/carddisp.pl?gene=DNAJB4
RNH1	Ribonuclease/Angiogenin Inhibitor 1	Protein Coding	36	GC11M002648	0.740088	https://www.genecards.org/cgi-bin/carddisp.pl?gene=RNH1
SPATA5L1	Spermatogenesis Associated 5 Like 1	Protein Coding	34	GC15P045402	0.740088	https://www.genecards.org/cgi-bin/carddisp.pl?gene=SPATA5L1
ARMCX3	Armadillo Repeat Containing X-Linked 3	Protein Coding	33	GC0XP101622	0.740088	https://www.genecards.org/cgi-bin/carddisp.pl?gene=ARMCX3
URB1	URB1 Ribosome Biogenesis Homolog	Protein Coding	31	GC21M032312	0.740088	https://www.genecards.org/cgi-bin/carddisp.pl?gene=URB1
UTP20	UTP20 Small Subunit Processome Component	Protein Coding	31	GC12P101280	0.740088	https://www.genecards.org/cgi-bin/carddisp.pl?gene=UTP20
GCN1	GCN1 Activator Of EIF2AK4	Protein Coding	29	GC12M120128	0.740088	https://www.genecards.org/cgi-bin/carddisp.pl?gene=GCN1
PUM3	Pumilio RNA Binding Family Member 3	Protein Coding	28	GC09M002721	0.740088	https://www.genecards.org/cgi-bin/carddisp.pl?gene=PUM3
JAK2	Janus Kinase 2	Protein Coding	51	GC09P004985	0.716681	https://www.genecards.org/cgi-bin/carddisp.pl?gene=JAK2
LDLR	Low Density Lipoprotein Receptor	Protein Coding	50	GC19P011091	0.716681	https://www.genecards.org/cgi-bin/carddisp.pl?gene=LDLR
CALR	Calreticulin	Protein Coding	50	GC19P012938	0.716681	https://www.genecards.org/cgi-bin/carddisp.pl?gene=CALR
CSNK2A1	Casein Kinase 2 Alpha 1	Protein Coding	50	GC20M000472	0.716681	https://www.genecards.org/cgi-bin/carddisp.pl?gene=CSNK2A1
RAD50	RAD50 Double Strand Break Repair Protein	Protein Coding	49	GC05P132556	0.716681	https://www.genecards.org/cgi-bin/carddisp.pl?gene=RAD50
SLC1A3	Solute Carrier Family 1 Member 3	Protein Coding	49	GC05P036639	0.716681	https://www.genecards.org/cgi-bin/carddisp.pl?gene=SLC1A3
MYH9	Myosin Heavy Chain 9	Protein Coding	48	GC22M036281	0.716681	https://www.genecards.org/cgi-bin/carddisp.pl?gene=MYH9
TPM1	Tropomyosin 1	Protein Coding	48	GC15P114623	0.716681	https://www.genecards.org/cgi-bin/carddisp.pl?gene=TPM1
ABCC1	ATP Binding Cassette Subfamily C Member 1	Protein Coding	48	GC16P015949	0.716681	https://www.genecards.org/cgi-bin/carddisp.pl?gene=ABCC1
USP7	Ubiquitin Specific Peptidase 7	Protein Coding	48	GC16M008892	0.716681	https://www.genecards.org/cgi-bin/carddisp.pl?gene=USP7
TFRC	Transferrin Receptor	Protein Coding	47	GC03M196027	0.716681	https://www.genecards.org/cgi-bin/carddisp.pl?gene=TFRC
SLC29A1	Solute Carrier Family 29 Member 1 (Augustine Blood Group)	Protein Coding	47	GC06P044219	0.716681	https://www.genecards.org/cgi-bin/carddisp.pl?gene=SLC29A1
DICER1	Dicer 1, Ribonuclease III	Protein Coding	47	GC14M095086	0.716681	https://www.genecards.org/cgi-bin/carddisp.pl?gene=DICER1
ATP7B	ATPase Copper Transporting Beta	Protein Coding	47	GC13M051930	0.716681	https://www.genecards.org/cgi-bin/carddisp.pl?gene=ATP7B
KEAP1	Kelch Like ECH Associated Protein 1	Protein Coding	47	GC19M010486	0.716681	https://www.genecards.org/cgi-bin/carddisp.pl?gene=KEAP1
PLOD3	Procollagen-Lysine,2-Oxoglutarate 5-Dioxygenase 3	Protein Coding	46	GC07M101205	0.716681	https://www.genecards.org/cgi-bin/carddisp.pl?gene=PLOD3
SUCLA2	Succinate-CoA Ligase ADP-Forming Subunit Beta	Protein Coding	46	GC13M047745	0.716681	https://www.genecards.org/cgi-bin/carddisp.pl?gene=SUCLA2
PPP2R1A	Protein Phosphatase 2 Scaffold Subunit Aalpha	Protein Coding	46	GC19P061809	0.716681	https://www.genecards.org/cgi-bin/carddisp.pl?gene=PPP2R1A
MYO6	Myosin VI	Protein Coding	45	GC06P075749	0.716681	https://www.genecards.org/cgi-bin/carddisp.pl?gene=MYO6
NNT	Nicotinamide Nucleotide Transhydrogenase	Protein Coding	45	GC05P044168	0.716681	https://www.genecards.org/cgi-bin/carddisp.pl?gene=NNT
MYH14	Myosin Heavy Chain 14	Protein Coding	45	GC19P052389	0.716681	https://www.genecards.org/cgi-bin/carddisp.pl?gene=MYH14
ATP2C1	ATPase Secretory Pathway Ca2+ Transporting 1	Protein Coding	45	GC03P130850	0.716681	https://www.genecards.org/cgi-bin/carddisp.pl?gene=ATP2C1
FUT8	Fucosyltransferase 8	Protein Coding	44	GC14P065411	0.716681	https://www.genecards.org/cgi-bin/carddisp.pl?gene=FUT8
MYO5A	Myosin VA	Protein Coding	44	GC15M080007	0.716681	https://www.genecards.org/cgi-bin/carddisp.pl?gene=MYO5A
RAD23B	RAD23 Homolog B, Nucleotide Excision Repair Protein	Protein Coding	44	GC09P107283	0.716681	https://www.genecards.org/cgi-bin/carddisp.pl?gene=RAD23B
TFG	Trafficking From ER To Golgi Regulator	Protein Coding	44	GC03P100709	0.716681	https://www.genecards.org/cgi-bin/carddisp.pl?gene=TFG
SAE1	SUMO1 Activating Enzyme Subunit 1	Protein Coding	44	GC19P052127	0.716681	https://www.genecards.org/cgi-bin/carddisp.pl?gene=SAE1
ATP6AP2	ATPase H+ Transporting Accessory Protein 2	Protein Coding	44	GC0XP040582	0.716681	https://www.genecards.org/cgi-bin/carddisp.pl?gene=ATP6AP2
CUX1	Cut Like Homeobox 1	Protein Coding	44	GC07P101815	0.716681	https://www.genecards.org/cgi-bin/carddisp.pl?gene=CUX1
PABPN1	Poly(A) Binding Protein Nuclear 1	Protein Coding	44	GC14P031130	0.716681	https://www.genecards.org/cgi-bin/carddisp.pl?gene=PABPN1
SLC19A2	Solute Carrier Family 19 Member 2	Protein Coding	44	GC01M169463	0.716681	https://www.genecards.org/cgi-bin/carddisp.pl?gene=SLC19A2
TOLLIP	Toll Interacting Protein	Protein Coding	43	GC11M001274	0.716681	https://www.genecards.org/cgi-bin/carddisp.pl?gene=TOLLIP
ATP2B1	ATPase Plasma Membrane Ca2+ Transporting 1	Protein Coding	43	GC12M089588	0.716681	https://www.genecards.org/cgi-bin/carddisp.pl?gene=ATP2B1
B3GAT3	Beta-1,3-Glucuronyltransferase 3	Protein Coding	43	GC11M084552	0.716681	https://www.genecards.org/cgi-bin/carddisp.pl?gene=B3GAT3
MARK2	Microtubule Affinity Regulating Kinase 2	Protein Coding	43	GC11P063838	0.716681	https://www.genecards.org/cgi-bin/carddisp.pl?gene=MARK2
FOXC1	Forkhead Box C1	Protein Coding	42	GC06P001610	0.716681	https://www.genecards.org/cgi-bin/carddisp.pl?gene=FOXC1
ELOVL5	ELOVL Fatty Acid Elongase 5	Protein Coding	42	GC06M053267	0.716681	https://www.genecards.org/cgi-bin/carddisp.pl?gene=ELOVL5
ABCB7	ATP Binding Cassette Subfamily B Member 7	Protein Coding	42	GC0XM075053	0.716681	https://www.genecards.org/cgi-bin/carddisp.pl?gene=ABCB7
P4HA1	Prolyl 4-Hydroxylase Subunit Alpha 1	Protein Coding	42	GC10M073007	0.716681	https://www.genecards.org/cgi-bin/carddisp.pl?gene=P4HA1
AMFR	Autocrine Motility Factor Receptor	Protein Coding	42	GC16M056361	0.716681	https://www.genecards.org/cgi-bin/carddisp.pl?gene=AMFR
CNNM2	Cyclin And CBS Domain Divalent Metal Cation Transport Mediator 2	Protein Coding	42	GC10P102918	0.716681	https://www.genecards.org/cgi-bin/carddisp.pl?gene=CNNM2
HDLBP	High Density Lipoprotein Binding Protein	Protein Coding	42	GC02M241227	0.716681	https://www.genecards.org/cgi-bin/carddisp.pl?gene=HDLBP
PIGK	Phosphatidylinositol Glycan Anchor Biosynthesis Class K	Protein Coding	42	GC01M077088	0.716681	https://www.genecards.org/cgi-bin/carddisp.pl?gene=PIGK
NME4	NME/NM23 Nucleoside Diphosphate Kinase 4	Protein Coding	41	GC16P000396	0.716681	https://www.genecards.org/cgi-bin/carddisp.pl?gene=NME4
SND1	Staphylococcal Nuclease And Tudor Domain Containing 1	Protein Coding	41	GC07P127652	0.716681	https://www.genecards.org/cgi-bin/carddisp.pl?gene=SND1
AGK	Acylglycerol Kinase	Protein Coding	41	GC07P141551	0.716681	https://www.genecards.org/cgi-bin/carddisp.pl?gene=AGK
WDR26	WD Repeat Domain 26	Protein Coding	41	GC01M224385	0.716681	https://www.genecards.org/cgi-bin/carddisp.pl?gene=WDR26
NDUFAF3	NADH:Ubiquinone Oxidoreductase Complex Assembly Factor 3	Protein Coding	40	GC03P049020	0.716681	https://www.genecards.org/cgi-bin/carddisp.pl?gene=NDUFAF3
TNPO3	Transportin 3	Protein Coding	40	GC07M128954	0.716681	https://www.genecards.org/cgi-bin/carddisp.pl?gene=TNPO3
CEP55	Centrosomal Protein 55	Protein Coding	40	GC10P093496	0.716681	https://www.genecards.org/cgi-bin/carddisp.pl?gene=CEP55
DYNC1I2	Dynein Cytoplasmic 1 Intermediate Chain 2	Protein Coding	40	GC02P171687	0.716681	https://www.genecards.org/cgi-bin/carddisp.pl?gene=DYNC1I2
DNA2	DNA Replication Helicase/Nuclease 2	Protein Coding	40	GC10M068414	0.716681	https://www.genecards.org/cgi-bin/carddisp.pl?gene=DNA2
DAD1	Defender Against Cell Death 1	Protein Coding	40	GC14M022565	0.716681	https://www.genecards.org/cgi-bin/carddisp.pl?gene=DAD1
ATAD1	ATPase Family AAA Domain Containing 1	Protein Coding	40	GC10M087751	0.716681	https://www.genecards.org/cgi-bin/carddisp.pl?gene=ATAD1
ATP13A1	ATPase 13A1	Protein Coding	40	GC19M019645	0.716681	https://www.genecards.org/cgi-bin/carddisp.pl?gene=ATP13A1
PIGT	Phosphatidylinositol Glycan Anchor Biosynthesis Class T	Protein Coding	40	GC20P045416	0.716681	https://www.genecards.org/cgi-bin/carddisp.pl?gene=PIGT
UBE3C	Ubiquitin Protein Ligase E3C	Protein Coding	40	GC07P157138	0.716681	https://www.genecards.org/cgi-bin/carddisp.pl?gene=UBE3C
IBTK	Inhibitor Of Bruton Tyrosine Kinase	Protein Coding	39	GC06M082169	0.716681	https://www.genecards.org/cgi-bin/carddisp.pl?gene=IBTK
RALGAPA1	Ral GTPase Activating Protein Catalytic Subunit Alpha 1	Protein Coding	39	GC14M035538	0.716681	https://www.genecards.org/cgi-bin/carddisp.pl?gene=RALGAPA1
TRIM9	Tripartite Motif Containing 9	Protein Coding	39	GC14M050975	0.716681	https://www.genecards.org/cgi-bin/carddisp.pl?gene=TRIM9
TMEM106B	Transmembrane Protein 106B	Protein Coding	39	GC07P012226	0.716681	https://www.genecards.org/cgi-bin/carddisp.pl?gene=TMEM106B
RBMS1	RNA Binding Motif Single Stranded Interacting Protein 1	Protein Coding	39	GC02M160272	0.716681	https://www.genecards.org/cgi-bin/carddisp.pl?gene=RBMS1
GSPT1	G1 To S Phase Transition 1	Protein Coding	39	GC16M011868	0.716681	https://www.genecards.org/cgi-bin/carddisp.pl?gene=GSPT1
USP28	Ubiquitin Specific Peptidase 28	Protein Coding	39	GC11M113797	0.716681	https://www.genecards.org/cgi-bin/carddisp.pl?gene=USP28
IPO7	Importin 7	Protein Coding	38	GC11P009384	0.716681	https://www.genecards.org/cgi-bin/carddisp.pl?gene=IPO7
MYL6B	Myosin Light Chain 6B	Protein Coding	38	GC12P057074	0.716681	https://www.genecards.org/cgi-bin/carddisp.pl?gene=MYL6B
ABLIM1	Actin Binding LIM Protein 1	Protein Coding	38	GC10M114469	0.716681	https://www.genecards.org/cgi-bin/carddisp.pl?gene=ABLIM1
ACOT9	Acyl-CoA Thioesterase 9	Protein Coding	38	GC0XM023701	0.716681	https://www.genecards.org/cgi-bin/carddisp.pl?gene=ACOT9
TBL3	Transducin Beta Like 3	Protein Coding	38	GC16P009887	0.716681	https://www.genecards.org/cgi-bin/carddisp.pl?gene=TBL3
TOM1L2	Target Of Myb1 Like 2 Membrane Trafficking Protein	Protein Coding	38	GC17M017843	0.716681	https://www.genecards.org/cgi-bin/carddisp.pl?gene=TOM1L2
TMOD1	Tropomodulin 1	Protein Coding	38	GC09P097501	0.716681	https://www.genecards.org/cgi-bin/carddisp.pl?gene=TMOD1
TELO2	Telomere Maintenance 2	Protein Coding	38	GC16P001493	0.716681	https://www.genecards.org/cgi-bin/carddisp.pl?gene=TELO2
CEP72	Centrosomal Protein 72	Protein Coding	38	GC05P000612	0.716681	https://www.genecards.org/cgi-bin/carddisp.pl?gene=CEP72
RDH13	Retinol Dehydrogenase 13	Protein Coding	38	GC19M055039	0.716681	https://www.genecards.org/cgi-bin/carddisp.pl?gene=RDH13
RFT1	RFT1 Homolog	Protein Coding	38	GC03M053071	0.716681	https://www.genecards.org/cgi-bin/carddisp.pl?gene=RFT1
PPP1R12B	Protein Phosphatase 1 Regulatory Subunit 12B	Protein Coding	38	GC01P202348	0.716681	https://www.genecards.org/cgi-bin/carddisp.pl?gene=PPP1R12B
WDR36	WD Repeat Domain 36	Protein Coding	38	GC05P111091	0.716681	https://www.genecards.org/cgi-bin/carddisp.pl?gene=WDR36
WDR11	WD Repeat Domain 11	Protein Coding	38	GC10P120851	0.716681	https://www.genecards.org/cgi-bin/carddisp.pl?gene=WDR11
WLS	Wnt Ligand Secretion Mediator	Protein Coding	38	GC01M068098	0.716681	https://www.genecards.org/cgi-bin/carddisp.pl?gene=WLS
KPNA5	Karyopherin Subunit Alpha 5	Protein Coding	37	GC06P116681	0.716681	https://www.genecards.org/cgi-bin/carddisp.pl?gene=KPNA5
IPO13	Importin 13	Protein Coding	37	GC01P043947	0.716681	https://www.genecards.org/cgi-bin/carddisp.pl?gene=IPO13
FASTKD1	FAST Kinase Domains 1	Protein Coding	37	GC02M169529	0.716681	https://www.genecards.org/cgi-bin/carddisp.pl?gene=FASTKD1
ACOT8	Acyl-CoA Thioesterase 8	Protein Coding	37	GC20M045841	0.716681	https://www.genecards.org/cgi-bin/carddisp.pl?gene=ACOT8
MRPL11	Mitochondrial Ribosomal Protein L11	Protein Coding	37	GC11M084745	0.716681	https://www.genecards.org/cgi-bin/carddisp.pl?gene=MRPL11
TNRC6B	Trinucleotide Repeat Containing Adaptor 6B	Protein Coding	37	GC22P040044	0.716681	https://www.genecards.org/cgi-bin/carddisp.pl?gene=TNRC6B
TNPO2	Transportin 2	Protein Coding	37	GC19M012699	0.716681	https://www.genecards.org/cgi-bin/carddisp.pl?gene=TNPO2
CPSF3	Cleavage And Polyadenylation Specific Factor 3	Protein Coding	37	GC02P009423	0.716681	https://www.genecards.org/cgi-bin/carddisp.pl?gene=CPSF3
CCAR1	Cell Division Cycle And Apoptosis Regulator 1	Protein Coding	37	GC10P068721	0.716681	https://www.genecards.org/cgi-bin/carddisp.pl?gene=CCAR1
PPP1R7	Protein Phosphatase 1 Regulatory Subunit 7	Protein Coding	37	GC02P241150	0.716681	https://www.genecards.org/cgi-bin/carddisp.pl?gene=PPP1R7
POLDIP2	DNA Polymerase Delta Interacting Protein 2	Protein Coding	37	GC17M028346	0.716681	https://www.genecards.org/cgi-bin/carddisp.pl?gene=POLDIP2
COPG2	COPI Coat Complex Subunit Gamma 2	Protein Coding	37	GC07M130506	0.716681	https://www.genecards.org/cgi-bin/carddisp.pl?gene=COPG2
COX7C	Cytochrome C Oxidase Subunit 7C	Protein Coding	37	GC05P086617	0.716681	https://www.genecards.org/cgi-bin/carddisp.pl?gene=COX7C
RSL1D1	Ribosomal L1 Domain Containing 1	Protein Coding	37	GC16M011833	0.716681	https://www.genecards.org/cgi-bin/carddisp.pl?gene=RSL1D1
WDR12	WD Repeat Domain 12	Protein Coding	37	GC02M202874	0.716681	https://www.genecards.org/cgi-bin/carddisp.pl?gene=WDR12
LIMCH1	LIM And Calponin Homology Domains 1	Protein Coding	36	GC04P041362	0.716681	https://www.genecards.org/cgi-bin/carddisp.pl?gene=LIMCH1
LETMD1	LETM1 Domain Containing 1	Protein Coding	36	GC12P051047	0.716681	https://www.genecards.org/cgi-bin/carddisp.pl?gene=LETMD1
NCLN	Nicalin	Protein Coding	36	GC19P003185	0.716681	https://www.genecards.org/cgi-bin/carddisp.pl?gene=NCLN
NOL8	Nucleolar Protein 8	Protein Coding	36	GC09M092297	0.716681	https://www.genecards.org/cgi-bin/carddisp.pl?gene=NOL8
FTSJ3	FtsJ RNA 2'-O-Methyltransferase 3	Protein Coding	36	GC17M063819	0.716681	https://www.genecards.org/cgi-bin/carddisp.pl?gene=FTSJ3
GARS1	Glycyl-TRNA Synthetase 1	Protein Coding	36	GC07P030580	0.716681	https://www.genecards.org/cgi-bin/carddisp.pl?gene=GARS1
HEATR1	HEAT Repeat Containing 1	Protein Coding	36	GC01M236549	0.716681	https://www.genecards.org/cgi-bin/carddisp.pl?gene=HEATR1
CEBPZ	CCAAT Enhancer Binding Protein Zeta	Protein Coding	36	GC02M037201	0.716681	https://www.genecards.org/cgi-bin/carddisp.pl?gene=CEBPZ
ATAD3B	ATPase Family AAA Domain Containing 3B	Protein Coding	36	GC01P003381	0.716681	https://www.genecards.org/cgi-bin/carddisp.pl?gene=ATAD3B
DNAJC1	DnaJ Heat Shock Protein Family (Hsp40) Member C1	Protein Coding	36	GC10M021762	0.716681	https://www.genecards.org/cgi-bin/carddisp.pl?gene=DNAJC1
DDX27	DEAD-Box Helicase 27	Protein Coding	36	GC20P049219	0.716681	https://www.genecards.org/cgi-bin/carddisp.pl?gene=DDX27
OCIAD1	OCIA Domain Containing 1	Protein Coding	36	GC04P048805	0.716681	https://www.genecards.org/cgi-bin/carddisp.pl?gene=OCIAD1
PWP2	PWP2 Small Subunit Processome Component	Protein Coding	36	GC21P044107	0.716681	https://www.genecards.org/cgi-bin/carddisp.pl?gene=PWP2
YTHDC2	YTH Domain Containing 2	Protein Coding	36	GC05P113513	0.716681	https://www.genecards.org/cgi-bin/carddisp.pl?gene=YTHDC2
YIF1B	Yip1 Interacting Factor Homolog B, Membrane Trafficking Protein	Protein Coding	35	GC19M038303	0.716681	https://www.genecards.org/cgi-bin/carddisp.pl?gene=YIF1B
ZFPL1	Zinc Finger Protein Like 1	Protein Coding	35	GC11P065084	0.716681	https://www.genecards.org/cgi-bin/carddisp.pl?gene=ZFPL1
INTS2	Integrator Complex Subunit 2	Protein Coding	34	GC17M061865	0.716681	https://www.genecards.org/cgi-bin/carddisp.pl?gene=INTS2
BZW1	Basic Leucine Zipper And W2 Domains 1	Protein Coding	34	GC02P200810	0.716681	https://www.genecards.org/cgi-bin/carddisp.pl?gene=BZW1
RRS1	Ribosome Biogenesis Regulator 1 Homolog	Protein Coding	34	GC08P066429	0.716681	https://www.genecards.org/cgi-bin/carddisp.pl?gene=RRS1
UNK	Unk Zinc Finger	Protein Coding	34	GC17P075784	0.716681	https://www.genecards.org/cgi-bin/carddisp.pl?gene=UNK
CCDC93	Coiled-Coil Domain Containing 93	Protein Coding	34	GC02M117915	0.716681	https://www.genecards.org/cgi-bin/carddisp.pl?gene=CCDC93
PIGX	Phosphatidylinositol Glycan Anchor Biosynthesis Class X	Protein Coding	34	GC03P196643	0.716681	https://www.genecards.org/cgi-bin/carddisp.pl?gene=PIGX
GID8	GID Complex Subunit 8 Homolog	Protein Coding	33	GC20P062938	0.716681	https://www.genecards.org/cgi-bin/carddisp.pl?gene=GID8
BRI3BP	BRI3 Binding Protein	Protein Coding	33	GC12P124993	0.716681	https://www.genecards.org/cgi-bin/carddisp.pl?gene=BRI3BP
LMBRD2	LMBR1 Domain Containing 2	Protein Coding	33	GC05M036098	0.716681	https://www.genecards.org/cgi-bin/carddisp.pl?gene=LMBRD2
[truncated: 2,601 more rows]

## Sheet: Relevance score>5
Gene Symbol	Description	Category	Gifts	GC Id	Relevance score	GeneCards Link
ACE2	Angiotensin Converting Enzyme 2	Protein Coding	48	GC0XM015494	33.9336	https://www.genecards.org/cgi-bin/carddisp.pl?gene=ACE2
TLR7	Toll Like Receptor 7	Protein Coding	46	GC0XP012867	23.9783	https://www.genecards.org/cgi-bin/carddisp.pl?gene=TLR7
IL6	Interleukin 6	Protein Coding	48	GC07P022725	22.2499	https://www.genecards.org/cgi-bin/carddisp.pl?gene=IL6
TMPRSS2	Transmembrane Serine Protease 2	Protein Coding	45	GC21M041464	19.6073	https://www.genecards.org/cgi-bin/carddisp.pl?gene=TMPRSS2
CRP	C-Reactive Protein	Protein Coding	45	GC01M159725	15.9421	https://www.genecards.org/cgi-bin/carddisp.pl?gene=CRP
TNNI3	Troponin I3, Cardiac Type	Protein Coding	48	GC19M055151	14.5716	https://www.genecards.org/cgi-bin/carddisp.pl?gene=TNNI3
TNF	Tumor Necrosis Factor	Protein Coding	50	GC06P076864	14.3125	https://www.genecards.org/cgi-bin/carddisp.pl?gene=TNF
IL10	Interleukin 10	Protein Coding	46	GC01M206767	13.3748	https://www.genecards.org/cgi-bin/carddisp.pl?gene=IL10
NLRP3	NLR Family Pyrin Domain Containing 3	Protein Coding	46	GC01P247415	13.0805	https://www.genecards.org/cgi-bin/carddisp.pl?gene=NLRP3
F3	Coagulation Factor III, Tissue Factor	Protein Coding	45	GC01M094570	12.959	https://www.genecards.org/cgi-bin/carddisp.pl?gene=F3
DPP4	Dipeptidyl Peptidase 4	Protein Coding	49	GC02M161992	12.4113	https://www.genecards.org/cgi-bin/carddisp.pl?gene=DPP4
HLA-A	Major Histocompatibility Complex, Class I, A	Protein Coding	46	GC06P076821	11.8153	https://www.genecards.org/cgi-bin/carddisp.pl?gene=HLA-A
IL4	Interleukin 4	Protein Coding	45	GC05P132673	11.8151	https://www.genecards.org/cgi-bin/carddisp.pl?gene=IL4
ACE	Angiotensin I Converting Enzyme	Protein Coding	50	GC17P063477	11.7299	https://www.genecards.org/cgi-bin/carddisp.pl?gene=ACE
TLR4	Toll Like Receptor 4	Protein Coding	50	GC09P117704	11.682	https://www.genecards.org/cgi-bin/carddisp.pl?gene=TLR4
APOE	Apolipoprotein E	Protein Coding	50	GC19P051999	11.6413	https://www.genecards.org/cgi-bin/carddisp.pl?gene=APOE
IFNA2	Interferon Alpha 2	Protein Coding	42	GC09M021384	11.3755	https://www.genecards.org/cgi-bin/carddisp.pl?gene=IFNA2
NRP1	Neuropilin 1	Protein Coding	45	GC10M033177	11.105	https://www.genecards.org/cgi-bin/carddisp.pl?gene=NRP1
ABO	ABO, Alpha 1-3-N-Acetylgalactosaminyltransferase And Alpha 1-3-Galactosyltransferase	Protein Coding	37	GC09M133250	10.9149	https://www.genecards.org/cgi-bin/carddisp.pl?gene=ABO
HLA-C	Major Histocompatibility Complex, Class I, C	Protein Coding	45	GC06M061260	10.7133	https://www.genecards.org/cgi-bin/carddisp.pl?gene=HLA-C
IL2RA	Interleukin 2 Receptor Subunit Alpha	Protein Coding	49	GC10M006010	10.7027	https://www.genecards.org/cgi-bin/carddisp.pl?gene=IL2RA
AR	Androgen Receptor	Protein Coding	51	GC0XP067544	10.3707	https://www.genecards.org/cgi-bin/carddisp.pl?gene=AR
NPPB	Natriuretic Peptide B	Protein Coding	43	GC01M011858	9.98545	https://www.genecards.org/cgi-bin/carddisp.pl?gene=NPPB
IL1B	Interleukin 1 Beta	Protein Coding	46	GC02M112829	9.87245	https://www.genecards.org/cgi-bin/carddisp.pl?gene=IL1B
EGFR	Epidermal Growth Factor Receptor	Protein Coding	52	GC07P055019	9.59044	https://www.genecards.org/cgi-bin/carddisp.pl?gene=EGFR
OAS1	2'-5'-Oligoadenylate Synthetase 1	Protein Coding	44	GC12P112918	9.39343	https://www.genecards.org/cgi-bin/carddisp.pl?gene=OAS1
SLC6A20	Solute Carrier Family 6 Member 20	Protein Coding	41	GC03M045755	9.18124	https://www.genecards.org/cgi-bin/carddisp.pl?gene=SLC6A20
IL22	Interleukin 22	Protein Coding	41	GC12M068248	8.80221	https://www.genecards.org/cgi-bin/carddisp.pl?gene=IL22
ARNTL	Aryl Hydrocarbon Receptor Nuclear Translocator Like	Protein Coding	41	GC11P013276	8.65159	https://www.genecards.org/cgi-bin/carddisp.pl?gene=ARNTL
F2	Coagulation Factor II, Thrombin	Protein Coding	48	GC11P046720	8.46279	https://www.genecards.org/cgi-bin/carddisp.pl?gene=F2
ADAM17	ADAM Metallopeptidase Domain 17	Protein Coding	50	GC02M009488	8.36421	https://www.genecards.org/cgi-bin/carddisp.pl?gene=ADAM17
IFNG	Interferon Gamma	Protein Coding	47	GC12M068154	8.07784	https://www.genecards.org/cgi-bin/carddisp.pl?gene=IFNG
CCR9	C-C Motif Chemokine Receptor 9	Protein Coding	40	GC03P046268	7.87815	https://www.genecards.org/cgi-bin/carddisp.pl?gene=CCR9
IFNB1	Interferon Beta 1	Protein Coding	42	GC09M021077	7.58944	https://www.genecards.org/cgi-bin/carddisp.pl?gene=IFNB1
IFNA1	Interferon Alpha 1	Protein Coding	40	GC09P021577	7.4002	https://www.genecards.org/cgi-bin/carddisp.pl?gene=IFNA1
CD99	CD99 Molecule (Xg Blood Group)	Protein Coding	39	GC0XP002691	6.41895	https://www.genecards.org/cgi-bin/carddisp.pl?gene=CD99
INS	Insulin	Protein Coding	46	GC11M002159	6.31271	https://www.genecards.org/cgi-bin/carddisp.pl?gene=INS
CD8A	CD8a Molecule	Protein Coding	45	GC02M086784	6.20338	https://www.genecards.org/cgi-bin/carddisp.pl?gene=CD8A
CCL17	C-C Motif Chemokine Ligand 17	Protein Coding	38	GC16P057411	6.13634	https://www.genecards.org/cgi-bin/carddisp.pl?gene=CCL17
CSF2	Colony Stimulating Factor 2	Protein Coding	42	GC05P132073	6.09223	https://www.genecards.org/cgi-bin/carddisp.pl?gene=CSF2
FCGR3A	Fc Gamma Receptor IIIa	Protein Coding	44	GC01M161541	6.05789	https://www.genecards.org/cgi-bin/carddisp.pl?gene=FCGR3A
TNFRSF1B	TNF Receptor Superfamily Member 1B	Protein Coding	46	GC01P012167	5.96407	https://www.genecards.org/cgi-bin/carddisp.pl?gene=TNFRSF1B
TAMM41	TAM41 Mitochondrial Translocator Assembly And Maintenance Homolog	Protein Coding	33	GC03M011721	5.80087	https://www.genecards.org/cgi-bin/carddisp.pl?gene=TAMM41
TLR3	Toll Like Receptor 3	Protein Coding	50	GC04P186059	5.73622	https://www.genecards.org/cgi-bin/carddisp.pl?gene=TLR3
CCR5	C-C Motif Chemokine Receptor 5	Protein Coding	45	GC03P046383	5.48104	https://www.genecards.org/cgi-bin/carddisp.pl?gene=CCR5
MUC1	Mucin 1, Cell Surface Associated	Protein Coding	48	GC01M155185	5.46882	https://www.genecards.org/cgi-bin/carddisp.pl?gene=MUC1
CXCL10	C-X-C Motif Chemokine Ligand 10	Protein Coding	43	GC04M076021	5.44137	https://www.genecards.org/cgi-bin/carddisp.pl?gene=CXCL10
PMS2	PMS1 Homolog 2, Mismatch Repair System Component	Protein Coding	48	GC07M005973	5.3268	https://www.genecards.org/cgi-bin/carddisp.pl?gene=PMS2
CHAT	Choline O-Acetyltransferase	Protein Coding	47	GC10P049609	5.3268	https://www.genecards.org/cgi-bin/carddisp.pl?gene=CHAT
INPP5E	Inositol Polyphosphate-5-Phosphatase E	Protein Coding	41	GC09M136428	5.3268	https://www.genecards.org/cgi-bin/carddisp.pl?gene=INPP5E
CXCL8	C-X-C Motif Chemokine Ligand 8	Protein Coding	40	GC04P073740	5.09742	https://www.genecards.org/cgi-bin/carddisp.pl?gene=CXCL8

## Sheet: GO-BP
Category	Term	Count	%	PValue	Genes	List Total	Pop Hits	Pop Total	Fold Enrichment	Bonferroni	Benjamini	FDR
GOTERM_BP_DIRECT	GO:0071222~cellular response to lipopolysaccharide	11	35.4839	2.04328e-13	IL10, CXCL10, IL6, CXCL8, CSF2, IL1B, NLRP3, CCR5, TNFRSF1B, TNF, TLR4	31	193	19256	35.403	1.71596e-10	1.71635e-10	1.48751e-10
GOTERM_BP_DIRECT	GO:0006955~immune response	13	41.9355	3.86009e-12	IL10, CXCL8, CSF2, HLA-C, HLA-A, TNFRSF1B, TNF, IL4, CD8A, IL1B, IL2RA, CCR5, TLR4	31	492	19256	16.4128	3.24251e-09	1.62124e-09	1.40507e-09
GOTERM_BP_DIRECT	GO:0010628~positive regulation of gene expression	13	41.9355	6.29221e-12	CRP, CXCL8, CSF2, F3, TNF, INS, IL4, AR, IL6, IFNG, IL1B, TLR4, TLR3	31	513	19256	15.7409	5.28544e-09	1.76182e-09	1.52691e-09
GOTERM_BP_DIRECT	GO:0006954~inflammatory response	12	38.7097	1.39144e-11	CRP, CXCL10, IL6, CXCL8, IL1B, IL2RA, NLRP3, CCR5, TNFRSF1B, TNF, TLR4, TLR3	31	411	19256	18.1361	1.16881e-08	2.92203e-09	2.53243e-09
GOTERM_BP_DIRECT	GO:0008284~positive regulation of cell proliferation	12	38.7097	3.06192e-10	DPP4, IL4, CXCL10, AR, IL6, ADAM17, CSF2, IFNG, IL1B, F2, EGFR, INS	31	549	19256	13.5773	2.57202e-07	5.14403e-08	4.45816e-08
GOTERM_BP_DIRECT	GO:0098586~cellular response to virus	7	22.5806	3.62206e-09	CXCL10, IL6, IFNG, OAS1, IFNB1, NLRP3, TLR3	31	86	19256	50.5596	3.04252e-06	5.07088e-07	4.39476e-07
GOTERM_BP_DIRECT	GO:0032722~positive regulation of chemokine production	6	19.3548	7.56102e-09	IL6, ADAM17, IFNG, TNF, TLR4, TLR3	31	45	19256	82.8215	6.35124e-06	9.07322e-07	7.86346e-07
GOTERM_BP_DIRECT	GO:0050729~positive regulation of inflammatory response	7	22.5806	1.60818e-08	IFNG, IL1B, NLRP3, TNF, TLR4, EGFR, TLR3	31	110	19256	39.5284	1.35086e-05	1.68859e-06	1.46345e-06
GOTERM_BP_DIRECT	GO:0032757~positive regulation of interleukin-8 production	6	19.3548	5.00216e-08	IL6, IL1B, TNF, F3, TLR4, TLR3	31	65	19256	57.338	4.20173e-05	4.66869e-06	4.04619e-06
GOTERM_BP_DIRECT	GO:0051092~positive regulation of NF-kappaB transcription factor activity	7	22.5806	1.5082e-07	AR, IL1B, NLRP3, TNF, TLR4, TLR3, INS	31	160	19256	27.1758	0.000126681	1.26689e-05	1.09797e-05
GOTERM_BP_DIRECT	GO:0007166~cell surface receptor signaling pathway	8	25.8065	3.47744e-07	CXCL10, IFNG, IFNB1, CD8A, IL2RA, CCR5, F2, EGFR	31	305	19256	16.2928	0.000292062	2.6555e-05	2.30143e-05
GOTERM_BP_DIRECT	GO:0032755~positive regulation of interleukin-6 production	6	19.3548	5.08755e-07	IL6, IFNG, IL1B, TNF, TLR4, TLR3	31	103	19256	36.1842	0.000427263	3.56128e-05	3.08645e-05
GOTERM_BP_DIRECT	GO:0050796~regulation of insulin secretion	5	16.129	8.14771e-07	DPP4, IL6, IFNG, IL1B, TNF	31	47	19256	66.081	0.000684174	5.26467e-05	4.56272e-05
GOTERM_BP_DIRECT	GO:0045944~positive regulation of transcription from RNA polymerase II promoter	12	38.7097	9.63186e-07	IL10, IL4, CXCL10, AR, IL6, IFNB1, IL1B, NLRP3, TNF, TLR4, EGFR, TLR3	31	1201	19256	6.20644	0.000808749	5.77911e-05	5.00857e-05
GOTERM_BP_DIRECT	GO:0045348~positive regulation of MHC class II biosynthetic process	4	12.9032	1.53311e-06	IL10, IL4, IFNG, TLR4	31	15	19256	165.643	0.00128699	8.16421e-05	7.07564e-05
GOTERM_BP_DIRECT	GO:0050830~defense response to Gram-positive bacterium	6	19.3548	1.55509e-06	CRP, IL6, ADAM17, IL1B, HLA-A, TNF	31	129	19256	28.8912	0.00130542	8.16421e-05	7.07564e-05
GOTERM_BP_DIRECT	GO:0048143~astrocyte activation	4	12.9032	2.28643e-06	IFNG, IL1B, TNF, EGFR	31	17	19256	146.156	0.00191876	0.000112977	9.79131e-05
GOTERM_BP_DIRECT	GO:0051044~positive regulation of membrane protein ectodomain proteolysis	4	12.9032	2.74083e-06	IFNG, IL1B, TNFRSF1B, TNF	31	18	19256	138.036	0.00229966	0.000127906	0.000110852
GOTERM_BP_DIRECT	GO:0032731~positive regulation of interleukin-1 beta production	5	16.129	3.03313e-06	IL6, IFNG, NLRP3, TNF, TLR4	31	65	19256	47.7816	0.00254459	0.000134096	0.000116217
GOTERM_BP_DIRECT	GO:0042531~positive regulation of tyrosine phosphorylation of STAT protein	5	16.129	3.85624e-06	IL4, IL6, CSF2, IFNG, TNF	31	69	19256	45.0117	0.00323401	0.000161962	0.000140367
GOTERM_BP_DIRECT	GO:1901224~positive regulation of NIK/NF-kappaB signaling	5	16.129	4.08553e-06	IL1B, TNF, TLR4, EGFR, TLR3	31	70	19256	44.3687	0.00342597	0.000163421	0.000141632
GOTERM_BP_DIRECT	GO:0060252~positive regulation of glial cell proliferation	4	12.9032	5.91735e-06	IL6, IL1B, TNF, EGFR	31	23	19256	108.028	0.00495826	0.000225935	0.000195811
GOTERM_BP_DIRECT	GO:0032729~positive regulation of interferon-gamma production	5	16.129	6.63009e-06	IL1B, HLA-A, TNF, TLR4, TLR3	31	79	19256	39.314	0.00555382	0.000242142	0.000209857
GOTERM_BP_DIRECT	GO:0060559~positive regulation of calcidiol 1-monooxygenase activity	3	9.67742	7.0325e-06	IFNG, IL1B, TNF	31	3	19256	621.161	0.00588991	0.000246137	0.000213319
GOTERM_BP_DIRECT	GO:0001774~microglial cell activation	4	12.9032	1.3466e-05	IL4, IFNG, TNF, TLR3	31	30	19256	82.8215	0.0112478	0.000452457	0.000392129
GOTERM_BP_DIRECT	GO:0001934~positive regulation of protein phosphorylation	6	19.3548	1.64049e-05	ADAM17, IFNG, IL1B, F2, TNF, EGFR	31	209	19256	17.8324	0.0136857	0.000530005	0.000459337
GOTERM_BP_DIRECT	GO:0032760~positive regulation of tumor necrosis factor production	5	16.129	2.29184e-05	IL6, IFNG, OAS1, TLR4, TLR3	31	108	19256	28.7575	0.0190676	0.000713018	0.000617949
GOTERM_BP_DIRECT	GO:0046427~positive regulation of JAK-STAT cascade	4	12.9032	2.55821e-05	IL10, IL6, F2, TNF	31	37	19256	67.1526	0.02126	0.000767463	0.000665135
GOTERM_BP_DIRECT	GO:0097421~liver regeneration	4	12.9032	3.75988e-05	IL10, IL6, TNF, EGFR	31	42	19256	59.1582	0.0310901	0.00105277	0.000912399
GOTERM_BP_DIRECT	GO:0006953~acute-phase response	4	12.9032	3.75988e-05	CRP, IL6, F2, INS	31	42	19256	59.1582	0.0310901	0.00105277	0.000912399
GOTERM_BP_DIRECT	GO:0030335~positive regulation of cell migration	6	19.3548	4.33654e-05	IL4, ADAM17, IL1B, F3, EGFR, INS	31	256	19256	14.5585	0.0357723	0.00117198	0.00101571
GOTERM_BP_DIRECT	GO:0000165~MAPK cascade	5	16.129	4.46467e-05	AR, IL1B, CCR5, TNF, EGFR	31	128	19256	24.2641	0.0368095	0.00117198	0.00101571
GOTERM_BP_DIRECT	GO:0010573~vascular endothelial growth factor production	3	9.67742	4.90369e-05	IL6, IL1B, TNF	31	7	19256	266.212	0.0403551	0.00124821	0.00108178
GOTERM_BP_DIRECT	GO:0045429~positive regulation of nitric oxide biosynthetic process	4	12.9032	5.98992e-05	IFNG, IL1B, TNF, TLR4	31	49	19256	50.707	0.0490719	0.00147986	0.00128255
GOTERM_BP_DIRECT	GO:0002674~negative regulation of acute inflammatory response	3	9.67742	6.53192e-05	IL4, NLRP3, INS	31	8	19256	232.935	0.0533917	0.00156766	0.00135864
GOTERM_BP_DIRECT	GO:0097191~extrinsic apoptotic signaling pathway	4	12.9032	7.16243e-05	IFNG, TNFRSF1B, TNF, TLR3	31	52	19256	47.7816	0.0583923	0.00167123	0.0014484
GOTERM_BP_DIRECT	GO:0034138~toll-like receptor 3 signaling pathway	3	9.67742	8.39004e-05	OAS1, TNF, TLR3	31	9	19256	207.054	0.068053	0.00180709	0.00156614
GOTERM_BP_DIRECT	GO:1901857~positive regulation of cellular respiration	3	9.67742	8.39004e-05	IL4, IFNG, OAS1	31	9	19256	207.054	0.068053	0.00180709	0.00156614
GOTERM_BP_DIRECT	GO:2000553~positive regulation of T-helper 2 cell cytokine production	3	9.67742	8.39004e-05	IL4, IL6, NLRP3	31	9	19256	207.054	0.068053	0.00180709	0.00156614
GOTERM_BP_DIRECT	GO:0010888~negative regulation of lipid storage	3	9.67742	0.000104774	CRP, IL6, TNF	31	10	19256	186.348	0.0842526	0.00220025	0.00190689
GOTERM_BP_DIRECT	GO:0007254~JNK cascade	4	12.9032	0.000109976	IL1B, TNF, TLR4, TLR3	31	60	19256	41.4108	0.0882458	0.00225317	0.00195274
GOTERM_BP_DIRECT	GO:0006959~humoral immune response	4	12.9032	0.000115543	IL6, IFNG, IFNB1, TNF	31	61	19256	40.7319	0.0924999	0.00231086	0.00200274
GOTERM_BP_DIRECT	GO:0001819~positive regulation of cytokine production	4	12.9032	0.000146139	IL10, IFNG, TNF, INS	31	66	19256	37.6461	0.115529	0.00285481	0.00247417
GOTERM_BP_DIRECT	GO:0048661~positive regulation of smooth muscle cell proliferation	4	12.9032	0.000174085	IL6, TNF, TLR4, EGFR	31	70	19256	35.4949	0.136053	0.00332343	0.00288031
GOTERM_BP_DIRECT	GO:0043406~positive regulation of MAP kinase activity	4	12.9032	0.000258557	IL1B, TNF, TLR4, EGFR	31	80	19256	31.0581	0.195244	0.00482639	0.00418287
GOTERM_BP_DIRECT	GO:0045087~innate immune response	7	22.5806	0.000272428	CRP, OAS1, HLA-C, NLRP3, HLA-A, TLR4, TLR3	31	597	19256	7.2833	0.204569	0.00496453	0.00430259
GOTERM_BP_DIRECT	GO:0034116~positive regulation of heterotypic cell-cell adhesion	3	9.67742	0.000277777	IL10, IL1B, TNF	31	16	19256	116.468	0.208136	0.00496453	0.00430259
GOTERM_BP_DIRECT	GO:0050995~negative regulation of lipid catabolic process	3	9.67742	0.000314509	IL1B, TNF, INS	31	17	19256	109.617	0.232203	0.00548641	0.00475489
GOTERM_BP_DIRECT	GO:0030183~B cell differentiation	4	12.9032	0.00032004	IL10, IL4, ADAM17, IFNB1	31	86	19256	28.8912	0.235763	0.00548641	0.00475489
GOTERM_BP_DIRECT	GO:0071260~cellular response to mechanical stimulus	4	12.9032	0.000331123	IL1B, TLR4, EGFR, TLR3	31	87	19256	28.5591	0.242846	0.00556286	0.00482115
GOTERM_BP_DIRECT	GO:0030307~positive regulation of cell growth	4	12.9032	0.000390252	ADAM17, F2, EGFR, INS	31	92	19256	27.007	0.279547	0.00637566	0.00552557
GOTERM_BP_DIRECT	GO:0042116~macrophage activation	3	9.67742	0.000394684	IL4, CSF2, TLR4	31	19	19256	98.0781	0.282225	0.00637566	0.00552557
GOTERM_BP_DIRECT	GO:0007267~cell-cell signaling	5	16.129	0.000425757	CXCL10, AR, IL1B, CCR5, INS	31	230	19256	13.5035	0.300725	0.00673231	0.00583467
GOTERM_BP_DIRECT	GO:0051607~defense response to virus	5	16.129	0.000432791	IL6, IFNG, OAS1, IFNB1, TLR3	31	231	19256	13.445	0.304847	0.00673231	0.00583467
GOTERM_BP_DIRECT	GO:0046330~positive regulation of JNK cascade	4	12.9032	0.000469686	IL1B, TNF, TLR4, TLR3	31	98	19256	25.3535	0.32607	0.00717338	0.00621693
GOTERM_BP_DIRECT	GO:0046718~viral entry into host cell	4	12.9032	0.000513012	DPP4, ACE2, CCR5, EGFR	31	101	19256	24.6004	0.350168	0.00769519	0.00666916
GOTERM_BP_DIRECT	GO:0007165~signal transduction	9	29.0323	0.00054523	IL10, CXCL10, AR, CXCL8, IL1B, NLRP3, CCR5, EGFR, TLR3	31	1267	19256	4.41235	0.367527	0.00803497	0.00696364
GOTERM_BP_DIRECT	GO:0050768~negative regulation of neurogenesis	3	9.67742	0.000633956	IL6, IL1B, TNF	31	24	19256	77.6452	0.412977	0.00902582	0.00782237
GOTERM_BP_DIRECT	GO:0035458~cellular response to interferon-beta	3	9.67742	0.000633956	OAS1, IFNB1, TLR3	31	24	19256	77.6452	0.412977	0.00902582	0.00782237
GOTERM_BP_DIRECT	GO:0009615~response to virus	4	12.9032	0.000675705	IFNG, OAS1, IFNB1, TNF	31	111	19256	22.3842	0.43322	0.00945987	0.00819856
GOTERM_BP_DIRECT	GO:0045893~positive regulation of transcription, DNA-templated	7	22.5806	0.000715637	IL10, IL4, AR, IL6, IL1B, TNF, EGFR	31	716	19256	6.07281	0.451929	0.00985468	0.00854072
GOTERM_BP_DIRECT	GO:0051091~positive regulation of sequence-specific DNA binding transcription factor activity	4	12.9032	0.000827153	IL10, IL6, IL1B, TNF	31	119	19256	20.8794	0.500974	0.0112066	0.00971238
GOTERM_BP_DIRECT	GO:0045671~negative regulation of osteoclast differentiation	3	9.67742	0.000928056	IL4, TLR4, TLR3	31	29	19256	64.2581	0.541561	0.0121807	0.0105566
GOTERM_BP_DIRECT	GO:1900017~positive regulation of cytokine production involved in inflammatory response	3	9.67742	0.000928056	IL6, TNF, TLR4	31	29	19256	64.2581	0.541561	0.0121807	0.0105566
GOTERM_BP_DIRECT	GO:0045840~positive regulation of mitotic nuclear division	3	9.67742	0.000993384	IL1B, TNF, INS	31	30	19256	62.1161	0.566064	0.0128376	0.0111259
GOTERM_BP_DIRECT	GO:0051897~positive regulation of protein kinase B signaling	4	12.9032	0.00102154	TNF, F3, EGFR, INS	31	128	19256	19.4113	0.576218	0.0130015	0.0112679
GOTERM_BP_DIRECT	GO:0050728~negative regulation of inflammatory response	4	12.9032	0.00104477	IL10, IL4, IL2RA, NLRP3	31	129	19256	19.2608	0.584414	0.0130986	0.0113521
GOTERM_BP_DIRECT	GO:0045930~negative regulation of mitotic cell cycle	3	9.67742	0.00135221	IL10, TNF, EGFR	31	35	19256	53.2424	0.679099	0.0167038	0.0144766
GOTERM_BP_DIRECT	GO:2001240~negative regulation of extrinsic apoptotic signaling pathway in absence of ligand	3	9.67742	0.00159302	CSF2, IL1B, TNF	31	38	19256	49.039	0.737946	0.0193933	0.0168075
GOTERM_BP_DIRECT	GO:0031663~lipopolysaccharide-mediated signaling pathway	3	9.67742	0.00167751	IL1B, TNF, TLR4	31	39	19256	47.7816	0.755928	0.0201301	0.0174461
GOTERM_BP_DIRECT	GO:0019221~cytokine-mediated signaling pathway	4	12.9032	0.00180346	IL6, IFNB1, IL1B, F3	31	156	19256	15.9272	0.780472	0.0213195	0.0184769
GOTERM_BP_DIRECT	GO:0032733~positive regulation of interleukin-10 production	3	9.67742	0.00185277	IL4, IL6, TLR4	31	41	19256	45.4508	0.789394	0.0213195	0.0184769
GOTERM_BP_DIRECT	GO:0042311~vasodilation	3	9.67742	0.00185277	TNF, EGFR, INS	31	41	19256	45.4508	0.789394	0.0213195	0.0184769
GOTERM_BP_DIRECT	GO:0043410~positive regulation of MAPK cascade	4	12.9032	0.00193859	AR, IL6, TNF, INS	31	160	19256	15.529	0.804069	0.0217675	0.0188651
GOTERM_BP_DIRECT	GO:0032728~positive regulation of interferon-beta production	3	9.67742	0.00194352	OAS1, TLR4, TLR3	31	42	19256	44.3687	0.804882	0.0217675	0.0188651
GOTERM_BP_DIRECT	GO:0032735~positive regulation of interleukin-12 production	3	9.67742	0.00203636	IFNG, TLR4, TLR3	31	43	19256	43.3368	0.819547	0.0225071	0.0195062
GOTERM_BP_DIRECT	GO:0045766~positive regulation of angiogenesis	4	12.9032	0.00207988	CXCL8, IL1B, F3, TLR3	31	164	19256	15.1503	0.826038	0.0226896	0.0196643
GOTERM_BP_DIRECT	GO:0045071~negative regulation of viral genome replication	3	9.67742	0.00232728	OAS1, IFNB1, TNF	31	46	19256	40.5105	0.858745	0.025063	0.0217213
GOTERM_BP_DIRECT	GO:0019882~antigen processing and presentation	3	9.67742	0.00242836	CD8A, HLA-C, HLA-A	31	47	19256	39.6486	0.870271	0.0258206	0.0223778
GOTERM_BP_DIRECT	GO:0050766~positive regulation of phagocytosis	3	9.67742	0.00274388	IFNG, IL1B, TNF	31	50	19256	37.2697	0.900543	0.0288107	0.0249693
GOTERM_BP_DIRECT	GO:0042110~T cell activation	3	9.67742	0.00285312	DPP4, IL4, CD8A	31	51	19256	36.5389	0.909286	0.0295879	0.0256428
GOTERM_BP_DIRECT	GO:0060557~positive regulation of vitamin D biosynthetic process	2	6.45161	0.00311357	IFNG, TNF	31	2	19256	621.161	0.927159	0.0315108	0.0273093
GOTERM_BP_DIRECT	GO:0051173~positive regulation of nitrogen compound metabolic process	2	6.45161	0.00311357	IFNG, TNF	31	2	19256	621.161	0.927159	0.0315108	0.0273093
GOTERM_BP_DIRECT	GO:0043123~positive regulation of I-kappaB kinase/NF-kappaB signaling	4	12.9032	0.00324977	IL1B, TNF, TLR4, TLR3	31	192	19256	12.9409	0.935058	0.0324977	0.0281647
GOTERM_BP_DIRECT	GO:0014823~response to activity	3	9.67742	0.00342952	IL10, IL6, TNF	31	56	19256	33.2765	0.944187	0.0338917	0.0293728
GOTERM_BP_DIRECT	GO:0006508~proteolysis	5	16.129	0.00355	DPP4, ACE2, ADAM17, TMPRSS2, F2	31	409	19256	7.59366	0.949577	0.0342836	0.0297124
GOTERM_BP_DIRECT	GO:1903078~positive regulation of protein localization to plasma membrane	3	9.67742	0.0035508	IFNG, TNF, EGFR	31	57	19256	32.6927	0.949611	0.0342836	0.0297124
GOTERM_BP_DIRECT	GO:0042102~positive regulation of T cell proliferation	3	9.67742	0.00459201	IL4, IL6, IL1B	31	65	19256	28.669	0.979062	0.0435571	0.0377495
GOTERM_BP_DIRECT	GO:0002439~chronic inflammatory response to antigenic stimulus	2	6.45161	0.00466683	IL10, TNF	31	3	19256	414.108	0.980343	0.0435571	0.0377495
GOTERM_BP_DIRECT	GO:0002730~regulation of dendritic cell cytokine production	2	6.45161	0.00466683	TLR4, TLR3	31	3	19256	414.108	0.980343	0.0435571	0.0377495
GOTERM_BP_DIRECT	GO:0035690~cellular response to drug	3	9.67742	0.00487181	IL1B, EGFR, TLR3	31	67	19256	27.8132	0.983466	0.0444817	0.0385508
GOTERM_BP_DIRECT	GO:0006006~glucose metabolic process	3	9.67742	0.00487181	OAS1, TNF, INS	31	67	19256	27.8132	0.983466	0.0444817	0.0385508
GOTERM_BP_DIRECT	GO:0051384~response to glucocorticoid	3	9.67742	0.0050146	IL10, IL6, TNF	31	68	19256	27.4042	0.985343	0.0448867	0.0389018
GOTERM_BP_DIRECT	GO:0002250~adaptive immune response	5	16.129	0.00502304	IFNG, IFNB1, CD8A, HLA-C, HLA-A	31	451	19256	6.88649	0.985447	0.0448867	0.0389018
GOTERM_BP_DIRECT	GO:0070098~chemokine-mediated signaling pathway	3	9.67742	0.00530593	CXCL10, CXCL8, CCR5	31	70	19256	26.6212	0.98854	0.04676	0.0405253
GOTERM_BP_DIRECT	GO:0008285~negative regulation of cell proliferation	5	16.129	0.005344	IL10, AR, IL6, CXCL8, IL1B	31	459	19256	6.76646	0.988902	0.04676	0.0405253
GOTERM_BP_DIRECT	GO:0032715~negative regulation of interleukin-6 production	3	9.67742	0.00545446	IL10, TNF, TLR4	31	71	19256	26.2463	0.989891	0.0472345	0.0409366
GOTERM_BP_DIRECT	GO:0042742~defense response to bacterium	4	12.9032	0.0056462	IL10, OAS1, TLR4, TLR3	31	234	19256	10.6181	0.991402	0.048396	0.0419432
GOTERM_BP_DIRECT	GO:0030730~sequestering of triglyceride	2	6.45161	0.00621776	IL1B, TNF	31	4	19256	310.581	0.994696	0.0512051	0.0443777
GOTERM_BP_DIRECT	GO:0060571~morphogenesis of an epithelial fold	2	6.45161	0.00621776	AR, EGFR	31	4	19256	310.581	0.994696	0.0512051	0.0443777
GOTERM_BP_DIRECT	GO:0097398~cellular response to interleukin-17	2	6.45161	0.00621776	CXCL10, IL1B	31	4	19256	310.581	0.994696	0.0512051	0.0443777
GOTERM_BP_DIRECT	GO:0045191~regulation of isotype switching	2	6.45161	0.00621776	IL10, IL4	31	4	19256	310.581	0.994696	0.0512051	0.0443777
GOTERM_BP_DIRECT	GO:0032720~negative regulation of tumor necrosis factor production	3	9.67742	0.00638539	IL10, IL4, TLR4	31	77	19256	24.2011	0.995396	0.0520751	0.0451317
GOTERM_BP_DIRECT	GO:0030593~neutrophil chemotaxis	3	9.67742	0.00721256	CXCL10, CXCL8, IL1B	31	82	19256	22.7254	0.997713	0.0582553	0.0504879
GOTERM_BP_DIRECT	GO:0014068~positive regulation of phosphatidylinositol 3-kinase signaling	3	9.67742	0.00738353	F2, TNF, INS	31	83	19256	22.4516	0.998021	0.0590683	0.0511925
GOTERM_BP_DIRECT	GO:0010750~positive regulation of nitric oxide mediated signal transduction	2	6.45161	0.00776635	EGFR, INS	31	5	19256	248.465	0.998569	0.0604049	0.0523509
GOTERM_BP_DIRECT	GO:0031622~positive regulation of fever generation	2	6.45161	0.00776635	IL1B, TNF	31	5	19256	248.465	0.998569	0.0604049	0.0523509
GOTERM_BP_DIRECT	GO:0071677~positive regulation of mononuclear cell migration	2	6.45161	0.00776635	IL4, TNF	31	5	19256	248.465	0.998569	0.0604049	0.0523509
GOTERM_BP_DIRECT	GO:0033138~positive regulation of peptidyl-serine phosphorylation	3	9.67742	0.00881678	IL6, TNF, EGFR	31	91	19256	20.4778	0.999412	0.0679459	0.0588864
GOTERM_BP_DIRECT	GO:0019722~calcium-mediated signaling	3	9.67742	0.00900404	CXCL8, CCR5, TNF	31	92	19256	20.2553	0.999498	0.0687581	0.0595904
GOTERM_BP_DIRECT	GO:0002719~negative regulation of cytokine production involved in immune response	2	6.45161	0.00931261	IL10, TNF	31	6	19256	207.054	0.999614	0.0698446	0.0605319
GOTERM_BP_DIRECT	GO:1903223~positive regulation of oxidative stress-induced neuron death	2	6.45161	0.00931261	TNF, TLR4	31	6	19256	207.054	0.999614	0.0698446	0.0605319
GOTERM_BP_DIRECT	GO:0071346~cellular response to interferon-gamma	3	9.67742	0.0103644	TNF, TLR4, TLR3	31	99	19256	18.8231	0.999842	0.0770451	0.0667724
GOTERM_BP_DIRECT	GO:0046813~receptor-mediated virion attachment to host cell	2	6.45161	0.0108565	DPP4, ACE2	31	7	19256	177.475	0.999896	0.0786163	0.0681341
GOTERM_BP_DIRECT	GO:0032747~positive regulation of interleukin-23 production	2	6.45161	0.0108565	CSF2, IFNG	31	7	19256	177.475	0.999896	0.0786163	0.0681341
GOTERM_BP_DIRECT	GO:0042092~type 2 immune response	2	6.45161	0.0108565	IL10, IL4	31	7	19256	177.475	0.999896	0.0786163	0.0681341
GOTERM_BP_DIRECT	GO:0010629~negative regulation of gene expression	4	12.9032	0.0119559	CXCL8, IFNG, TNF, INS	31	308	19256	8.06703	0.999959	0.085837	0.074392
GOTERM_BP_DIRECT	GO:0002486~antigen processing and presentation of endogenous peptide antigen via MHC class I via ER pathway, TAP-independent	2	6.45161	0.0123981	HLA-C, HLA-A	31	8	19256	155.29	0.999972	0.086467	0.0749381
GOTERM_BP_DIRECT	GO:0022898~regulation of transmembrane transporter activity	2	6.45161	0.0123981	ACE2, INS	31	8	19256	155.29	0.999972	0.086467	0.0749381
GOTERM_BP_DIRECT	GO:0097527~necroptotic signaling pathway	2	6.45161	0.0123981	TNF, TLR3	31	8	19256	155.29	0.999972	0.086467	0.0749381
GOTERM_BP_DIRECT	GO:0061844~antimicrobial humoral immune response mediated by antimicrobial peptide	3	9.67742	0.0124554	CXCL10, CXCL8, F2	31	109	19256	17.0962	0.999973	0.086467	0.0749381
GOTERM_BP_DIRECT	GO:0042593~glucose homeostasis	3	9.67742	0.0135645	IL6, OAS1, INS	31	114	19256	16.3463	0.99999	0.0933947	0.0809421
GOTERM_BP_DIRECT	GO:1903140~regulation of establishment of endothelial barrier	2	6.45161	0.0139374	IL1B, TNF	31	9	19256	138.036	0.999992	0.0944148	0.0818261
GOTERM_BP_DIRECT	GO:0050999~regulation of nitric-oxide synthase activity	2	6.45161	0.0139374	IL1B, EGFR	31	9	19256	138.036	0.999992	0.0944148	0.0818261
GOTERM_BP_DIRECT	GO:0019065~receptor-mediated endocytosis of virus by host cell	2	6.45161	0.0154744	DPP4, ACE2	31	10	19256	124.232	0.999998	0.103988	0.0901228
GOTERM_BP_DIRECT	GO:0006935~chemotaxis	3	9.67742	0.015665	CXCL10, CXCL8, CCR5	31	123	19256	15.1503	0.999998	0.104433	0.0905089
GOTERM_BP_DIRECT	GO:1900222~negative regulation of beta-amyloid clearance	2	6.45161	0.017009	IFNG, TNF	31	11	19256	112.938	0.999999	0.109065	0.0945234
GOTERM_BP_DIRECT	GO:0002237~response to molecule of bacterial origin	2	6.45161	0.017009	IL10, CXCL8	31	11	19256	112.938	0.999999	0.109065	0.0945234
GOTERM_BP_DIRECT	GO:0002446~neutrophil mediated immunity	2	6.45161	0.017009	IL6, ADAM17	31	11	19256	112.938	0.999999	0.109065	0.0945234
GOTERM_BP_DIRECT	GO:0072577~endothelial cell apoptotic process	2	6.45161	0.017009	IL10, TNF	31	11	19256	112.938	0.999999	0.109065	0.0945234
GOTERM_BP_DIRECT	GO:0071803~positive regulation of podosome assembly	2	6.45161	0.017009	CSF2, TNF	31	11	19256	112.938	0.999999	0.109065	0.0945234
GOTERM_BP_DIRECT	GO:0007252~I-kappaB phosphorylation	2	6.45161	0.0185414	TLR4, TLR3	31	12	19256	103.527	1	0.116229	0.100732
GOTERM_BP_DIRECT	GO:1903800~positive regulation of production of miRNAs involved in gene silencing by miRNA	2	6.45161	0.0185414	IL6, EGFR	31	12	19256	103.527	1	0.116229	0.100732
GOTERM_BP_DIRECT	GO:2000273~positive regulation of receptor activity	2	6.45161	0.0185414	IL10, IFNG	31	12	19256	103.527	1	0.116229	0.100732
GOTERM_BP_DIRECT	GO:0002690~positive regulation of leukocyte chemotaxis	2	6.45161	0.0200714	IL6, ADAM17	31	13	19256	95.5633	1	0.12397	0.107441
GOTERM_BP_DIRECT	GO:2000343~positive regulation of chemokine (C-X-C motif) ligand 2 production	2	6.45161	0.0200714	TNF, TLR4	31	13	19256	95.5633	1	0.12397	0.107441
GOTERM_BP_DIRECT	GO:1904996~positive regulation of leukocyte adhesion to vascular endothelial cell	2	6.45161	0.0215991	IL6, TNF	31	14	19256	88.7373	1	0.132432	0.114775
GOTERM_BP_DIRECT	GO:0097028~dendritic cell differentiation	2	6.45161	0.0231245	IL4, CSF2	31	15	19256	82.8215	1	0.138747	0.120247
GOTERM_BP_DIRECT	GO:0034142~toll-like receptor 4 signaling pathway	2	6.45161	0.0231245	OAS1, TLR4	31	15	19256	82.8215	1	0.138747	0.120247
GOTERM_BP_DIRECT	GO:0002523~leukocyte migration involved in inflammatory response	2	6.45161	0.0231245	NLRP3, TNF	31	15	19256	82.8215	1	0.138747	0.120247
GOTERM_BP_DIRECT	GO:0032496~response to lipopolysaccharide	3	9.67742	0.0244559	ADAM17, IL1B, TLR4	31	156	19256	11.9454	1	0.144783	0.125479
GOTERM_BP_DIRECT	GO:0048566~embryonic digestive tract development	2	6.45161	0.0246476	CXCL8, TNF	31	16	19256	77.6452	1	0.144783	0.125479
GOTERM_BP_DIRECT	GO:0071639~positive regulation of monocyte chemotactic protein-1 production	2	6.45161	0.0246476	OAS1, IL1B	31	16	19256	77.6452	1	0.144783	0.125479
GOTERM_BP_DIRECT	GO:0050708~regulation of protein secretion	2	6.45161	0.0261684	TNF, INS	31	17	19256	73.0778	1	0.152649	0.132296
GOTERM_BP_DIRECT	GO:0051770~positive regulation of nitric-oxide synthase biosynthetic process	2	6.45161	0.027687	IFNG, TLR4	31	18	19256	69.0179	1	0.160393	0.139008
GOTERM_BP_DIRECT	GO:0043011~myeloid dendritic cell differentiation	2	6.45161	0.0292032	IL4, CSF2	31	19	19256	65.3854	1	0.166875	0.144625
GOTERM_BP_DIRECT	GO:0071360~cellular response to exogenous dsRNA	2	6.45161	0.0292032	IFNB1, TLR3	31	19	19256	65.3854	1	0.166875	0.144625
GOTERM_BP_DIRECT	GO:0001892~embryonic placenta development	2	6.45161	0.0307172	CSF2, EGFR	31	20	19256	62.1161	1	0.173171	0.150081
GOTERM_BP_DIRECT	GO:0043032~positive regulation of macrophage activation	2	6.45161	0.0307172	IL10, TLR4	31	20	19256	62.1161	1	0.173171	0.150081
GOTERM_BP_DIRECT	GO:1902004~positive regulation of beta-amyloid formation	2	6.45161	0.0322288	IFNG, TNF	31	21	19256	59.1582	1	0.178107	0.154359
GOTERM_BP_DIRECT	GO:0033141~positive regulation of peptidyl-serine phosphorylation of STAT protein	2	6.45161	0.0322288	IFNG, IFNB1	31	21	19256	59.1582	1	0.178107	0.154359
GOTERM_BP_DIRECT	GO:0032930~positive regulation of superoxide anion generation	2	6.45161	0.0322288	CRP, EGFR	31	21	19256	59.1582	1	0.178107	0.154359
GOTERM_BP_DIRECT	GO:0001666~response to hypoxia	3	9.67742	0.0324998	DPP4, ADAM17, TNF	31	182	19256	10.2389	1	0.17843	0.15464
GOTERM_BP_DIRECT	GO:1903076~regulation of protein localization to plasma membrane	2	6.45161	0.0337382	AR, INS	31	22	19256	56.4692	1	0.184027	0.15949
GOTERM_BP_DIRECT	GO:0032700~negative regulation of interleukin-17 production	2	6.45161	0.0352453	IFNG, TLR4	31	23	19256	54.014	1	0.191007	0.165539
GOTERM_BP_DIRECT	GO:0045672~positive regulation of osteoclast differentiation	2	6.45161	0.0367502	IFNG, TNF	31	24	19256	51.7634	1	0.195381	0.16933
GOTERM_BP_DIRECT	GO:0045861~negative regulation of proteolysis	2	6.45161	0.0367502	F2, INS	31	24	19256	51.7634	1	0.195381	0.16933
GOTERM_BP_DIRECT	GO:0045821~positive regulation of glycolytic process	2	6.45161	0.0367502	IFNG, INS	31	24	19256	51.7634	1	0.195381	0.16933
GOTERM_BP_DIRECT	GO:0030225~macrophage differentiation	2	6.45161	0.0382528	CSF2, IFNG	31	25	19256	49.6929	1	0.200827	0.17405
GOTERM_BP_DIRECT	GO:0060907~positive regulation of macrophage cytokine production	2	6.45161	0.0382528	TLR4, TLR3	31	25	19256	49.6929	1	0.200827	0.17405
GOTERM_BP_DIRECT	GO:0032727~positive regulation of interferon-alpha production	2	6.45161	0.0397531	TLR4, TLR3	31	26	19256	47.7816	1	0.204862	0.177547
GOTERM_BP_DIRECT	GO:0050807~regulation of synapse organization	2	6.45161	0.0397531	IL10, TNF	31	26	19256	47.7816	1	0.204862	0.177547
GOTERM_BP_DIRECT	GO:0051000~positive regulation of nitric-oxide synthase activity	2	6.45161	0.0397531	TNF, INS	31	26	19256	47.7816	1	0.204862	0.177547
GOTERM_BP_DIRECT	GO:0002639~positive regulation of immunoglobulin production	2	6.45161	0.0412511	IL10, IL6	31	27	19256	46.0119	1	0.210006	0.182005
GOTERM_BP_DIRECT	GO:0045662~negative regulation of myoblast differentiation	2	6.45161	0.0412511	CXCL10, TNF	31	27	19256	46.0119	1	0.210006	0.182005
GOTERM_BP_DIRECT	GO:0070372~regulation of ERK1 and ERK2 cascade	2	6.45161	0.0442404	IL1B, EGFR	31	29	19256	42.8387	1	0.223867	0.194018
GOTERM_BP_DIRECT	GO:0010575~positive regulation of vascular endothelial growth factor production	2	6.45161	0.0457317	IL6, IL1B	31	30	19256	41.4108	1	0.230028	0.199357
GOTERM_BP_DIRECT	GO:0042327~positive regulation of phosphorylation	2	6.45161	0.0472207	AR, EGFR	31	31	19256	40.0749	1	0.234707	0.203412
GOTERM_BP_DIRECT	GO:0051281~positive regulation of release of sequestered calcium ion into cytosol	2	6.45161	0.0472207	CXCL10, F2	31	31	19256	40.0749	1	0.234707	0.203412
GOTERM_BP_DIRECT	GO:0043066~negative regulation of apoptotic process	4	12.9032	0.047692	IL10, IL4, IL6, EGFR	31	526	19256	4.72366	1	0.235654	0.204234
GOTERM_BP_DIRECT	GO:0070374~positive regulation of ERK1 and ERK2 cascade	3	9.67742	0.0488714	TNF, TLR4, EGFR	31	228	19256	8.17317	1	0.24007	0.208061
GOTERM_BP_DIRECT	GO:1900182~positive regulation of protein localization to nucleus	2	6.45161	0.050192	F2, INS	31	33	19256	37.6461	1	0.245124	0.212441
GOTERM_BP_DIRECT	GO:0043330~response to exogenous dsRNA	2	6.45161	0.0516743	IFNB1, TLR3	31	34	19256	36.5389	1	0.250904	0.21745
GOTERM_BP_DIRECT	GO:0097192~extrinsic apoptotic signaling pathway in absence of ligand	2	6.45161	0.0531544	IL4, IL1B	31	35	19256	35.4949	1	0.255141	0.221122
GOTERM_BP_DIRECT	GO:2000379~positive regulation of reactive oxygen species metabolic process	2	6.45161	0.0531544	ACE2, F2	31	35	19256	35.4949	1	0.255141	0.221122
GOTERM_BP_DIRECT	GO:0009410~response to xenobiotic stimulus	3	9.67742	0.0539457	IL10, ADAM17, TNF	31	241	19256	7.7323	1	0.256375	0.222191
GOTERM_BP_DIRECT	GO:0048662~negative regulation of smooth muscle cell proliferation	2	6.45161	0.0546322	ACE2, IFNG	31	36	19256	34.509	1	0.256375	0.222191
GOTERM_BP_DIRECT	GO:2000352~negative regulation of endothelial cell apoptotic process	2	6.45161	0.0546322	IL10, IL4	31	36	19256	34.509	1	0.256375	0.222191
GOTERM_BP_DIRECT	GO:0045582~positive regulation of T cell differentiation	2	6.45161	0.0546322	IL4, IL2RA	31	36	19256	34.509	1	0.256375	0.222191
GOTERM_BP_DIRECT	GO:0043122~regulation of I-kappaB kinase/NF-kappaB signaling	2	6.45161	0.0561078	IL1B, TNF	31	37	19256	33.5763	1	0.26039	0.225671
GOTERM_BP_DIRECT	GO:2001237~negative regulation of extrinsic apoptotic signaling pathway	2	6.45161	0.0561078	IL4, AR	31	37	19256	33.5763	1	0.26039	0.225671
GOTERM_BP_DIRECT	GO:0007259~JAK-STAT cascade	2	6.45161	0.061988	CSF2, IFNG	31	41	19256	30.3006	1	0.286098	0.247952
GOTERM_BP_DIRECT	GO:0045892~negative regulation of transcription, DNA-templated	4	12.9032	0.0630462	IL4, CSF2, IFNG, TNF	31	590	19256	4.21126	1	0.288109	0.249694
GOTERM_BP_DIRECT	GO:0071392~cellular response to estradiol stimulus	2	6.45161	0.0634525	IL10, EGFR	31	42	19256	29.5791	1	0.288109	0.249694
GOTERM_BP_DIRECT	GO:0061025~membrane fusion	2	6.45161	0.0634525	DPP4, ACE2	31	42	19256	29.5791	1	0.288109	0.249694
GOTERM_BP_DIRECT	GO:0006915~apoptotic process	4	12.9032	0.0674736	IFNG, IL1B, IL2RA, NLRP3	31	607	19256	4.09332	1	0.298322	0.258546
GOTERM_BP_DIRECT	GO:0042100~B cell proliferation	2	6.45161	0.0678328	IL10, IFNB1	31	45	19256	27.6072	1	0.298322	0.258546
GOTERM_BP_DIRECT	GO:0030890~positive regulation of B cell proliferation	2	6.45161	0.0678328	IL4, TLR4	31	45	19256	27.6072	1	0.298322	0.258546
GOTERM_BP_DIRECT	GO:0060337~type I interferon signaling pathway	2	6.45161	0.0678328	OAS1, IFNB1	31	45	19256	27.6072	1	0.298322	0.258546
GOTERM_BP_DIRECT	GO:0042177~negative regulation of protein catabolic process	2	6.45161	0.0678328	EGFR, INS	31	45	19256	27.6072	1	0.298322	0.258546
GOTERM_BP_DIRECT	GO:0032689~negative regulation of interferon-gamma production	2	6.45161	0.0678328	IL10, TLR4	31	45	19256	27.6072	1	0.298322	0.258546
GOTERM_BP_DIRECT	GO:1904646~cellular response to beta-amyloid	2	6.45161	0.0707419	TNF, TLR4	31	47	19256	26.4324	1	0.307892	0.26684
GOTERM_BP_DIRECT	GO:2000272~negative regulation of receptor activity	2	6.45161	0.0707419	ACE2, TNF	31	47	19256	26.4324	1	0.307892	0.26684
GOTERM_BP_DIRECT	GO:1902895~positive regulation of pri-miRNA transcription from RNA polymerase II promoter	2	6.45161	0.0721932	IL10, TNF	31	48	19256	25.8817	1	0.310852	0.269405
GOTERM_BP_DIRECT	GO:0042130~negative regulation of T cell proliferation	2	6.45161	0.0721932	IL10, IL2RA	31	48	19256	25.8817	1	0.310852	0.269405
GOTERM_BP_DIRECT	GO:0007173~epidermal growth factor receptor signaling pathway	2	6.45161	0.0736423	ADAM17, EGFR	31	49	19256	25.3535	1	0.310852	0.269405
GOTERM_BP_DIRECT	GO:0050673~epithelial cell proliferation	2	6.45161	0.0736423	AR, EGFR	31	49	19256	25.3535	1	0.310852	0.269405
GOTERM_BP_DIRECT	GO:0010718~positive regulation of epithelial to mesenchymal transition	2	6.45161	0.0736423	IL6, IL1B	31	49	19256	25.3535	1	0.310852	0.269405
GOTERM_BP_DIRECT	GO:0045737~positive regulation of cyclin-dependent protein serine/threonine kinase activity	2	6.45161	0.0736423	ADAM17, EGFR	31	49	19256	25.3535	1	0.310852	0.269405
GOTERM_BP_DIRECT	GO:0008630~intrinsic apoptotic signaling pathway in response to DNA damage	2	6.45161	0.0750892	TNFRSF1B, TNF	31	50	19256	24.8465	1	0.315375	0.273325
GOTERM_BP_DIRECT	GO:1900087~positive regulation of G1/S transition of mitotic cell cycle	2	6.45161	0.0765339	ADAM17, EGFR	31	51	19256	24.3593	1	0.31826	0.275825
GOTERM_BP_DIRECT	GO:0050890~cognition	2	6.45161	0.0765339	TNF, INS	31	51	19256	24.3593	1	0.31826	0.275825
GOTERM_BP_DIRECT	GO:0043491~protein kinase B signaling	2	6.45161	0.0794168	IL1B, TNF	31	53	19256	23.44	1	0.328621	0.284805
GOTERM_BP_DIRECT	GO:0043280~positive regulation of cysteine-type endopeptidase activity involved in apoptotic process	2	6.45161	0.080855	NLRP3, TNF	31	54	19256	23.006	1	0.332329	0.288019
GOTERM_BP_DIRECT	GO:0033209~tumor necrosis factor-mediated signaling pathway	2	6.45161	0.082291	TNFRSF1B, TNF	31	55	19256	22.5877	1	0.332329	0.288019
GOTERM_BP_DIRECT	GO:1904707~positive regulation of vascular smooth muscle cell proliferation	2	6.45161	0.082291	IL10, TNF	31	55	19256	22.5877	1	0.332329	0.288019
GOTERM_BP_DIRECT	GO:0031334~positive regulation of protein complex assembly	2	6.45161	0.082291	IFNG, TNF	31	55	19256	22.5877	1	0.332329	0.288019
GOTERM_BP_DIRECT	GO:0071407~cellular response to organic cyclic compound	2	6.45161	0.082291	IL1B, TNF	31	55	19256	22.5877	1	0.332329	0.288019
GOTERM_BP_DIRECT	GO:0045599~negative regulation of fat cell differentiation	2	6.45161	0.0865861	IL6, TNF	31	58	19256	21.4194	1	0.348001	0.301601
GOTERM_BP_DIRECT	GO:0071230~cellular response to amino acid stimulus	2	6.45161	0.0880134	TNF, EGFR	31	59	19256	21.0563	1	0.352054	0.305113
GOTERM_BP_DIRECT	GO:0045597~positive regulation of cell differentiation	2	6.45161	0.0894386	AR, INS	31	60	19256	20.7054	1	0.356059	0.308584
GOTERM_BP_DIRECT	GO:0007249~I-kappaB kinase/NF-kappaB signaling	2	6.45161	0.0908617	IL1B, TNF	31	61	19256	20.3659	1	0.360018	0.312016
GOTERM_BP_DIRECT	GO:0043065~positive regulation of apoptotic process	3	9.67742	0.0921332	IL6, TNF, TLR3	31	328	19256	5.68135	1	0.363342	0.314897
GOTERM_BP_DIRECT	GO:0030168~platelet activation	2	6.45161	0.0951179	IL6, F2	31	64	19256	19.4113	1	0.37336	0.323579
GOTERM_BP_DIRECT	GO:0071466~cellular response to xenobiotic stimulus	2	6.45161	0.0965324	IL1B, TLR3	31	65	19256	19.1127	1	0.37715	0.326863

## Sheet: GO-CC
Category	Term	Count	%	PValue	Genes	List Total	Pop Hits	Pop Total	Fold Enrichment	Bonferroni	Benjamini	FDR
GOTERM_CC_DIRECT	GO:0005576~extracellular region	20	64.5161	3.38763e-12	IL10, CRP, CXCL8, CSF2, IFNB1, TMPRSS2, F2, TNFRSF1B, TNF, INS, DPP4, IL4, ACE2, CXCL10, IL6, IFNG, OAS1, CD8A, IL1B, NLRP3	31	2127	20472	6.20956	3.11661e-10	3.11662e-10	2.7101e-10
GOTERM_CC_DIRECT	GO:0005615~extracellular space	18	58.0645	1.30418e-10	IL10, CRP, CXCL8, CSF2, IFNB1, F2, F3, TNF, EGFR, INS, IL4, ACE2, CXCL10, MUC1, IL6, IFNG, IL1B, TLR3	31	1936	20472	6.13996	1.19984e-08	5.99922e-09	5.21671e-09
GOTERM_CC_DIRECT	GO:0009986~cell surface	10	32.2581	2.08658e-07	DPP4, ACE2, ADAM17, HLA-C, HLA-A, CCR5, TNF, F3, TLR4, EGFR	31	638	20472	10.3509	1.91964e-05	6.39886e-06	5.56423e-06
GOTERM_CC_DIRECT	GO:0005887~integral component of plasma membrane	12	38.7097	4.92164e-06	ADAM17, MUC1, CD8A, HLA-C, TMPRSS2, HLA-A, CCR5, TNF, F3, TLR4, EGFR, TLR3	31	1508	20472	5.25507	0.000452689	0.000113198	9.84327e-05
GOTERM_CC_DIRECT	GO:0045121~membrane raft	6	19.3548	2.95285e-05	DPP4, ACE2, ADAM17, TNFRSF1B, TNF, EGFR	31	251	20472	15.7861	0.00271297	0.000543324	0.000472456
GOTERM_CC_DIRECT	GO:0009897~external side of plasma membrane	7	22.5806	4.45614e-05	CXCL10, CD8A, IL2RA, CCR5, F2, TNF, TLR4	31	456	20472	10.1375	0.00409135	0.000683275	0.000594152
GOTERM_CC_DIRECT	GO:0005886~plasma membrane	18	58.0645	0.000186582	CSF2, HLA-C, TMPRSS2, HLA-A, F2, TNFRSF1B, F3, TNF, EGFR, DPP4, ACE2, AR, MUC1, ADAM17, CD8A, IL2RA, CCR5, TLR4	31	5066	20472	2.34642	0.0170206	0.00245222	0.00213236
GOTERM_CC_DIRECT	GO:0000139~Golgi membrane	7	22.5806	0.000304859	ADAM17, HLA-C, NLRP3, HLA-A, EGFR, TLR3, INS	31	648	20472	7.13381	0.0276615	0.00350587	0.00304859
GOTERM_CC_DIRECT	GO:0005788~endoplasmic reticulum lumen	5	16.129	0.00098711	ACE2, IL6, ADAM17, F2, INS	31	306	20472	10.7906	0.0868535	0.0100905	0.00877431
GOTERM_CC_DIRECT	GO:0016021~integral component of membrane	17	54.8387	0.00153653	HLA-C, TMPRSS2, HLA-A, TNFRSF1B, F3, TNF, EGFR, DPP4, ACE2, AR, MUC1, ADAM17, CD8A, IL2RA, CCR5, TLR4, TLR3	31	5406	20472	2.07669	0.131918	0.014136	0.0122922
GOTERM_CC_DIRECT	GO:0016324~apical plasma membrane	5	16.129	0.0020632	DPP4, ACE2, ADAM17, MUC1, EGFR	31	374	20472	8.8287	0.17305	0.0172559	0.0150051
GOTERM_CC_DIRECT	GO:0016020~membrane	11	35.4839	0.00247115	DPP4, ACE2, ADAM17, OAS1, HLA-C, TMPRSS2, HLA-A, TNFRSF1B, TNF, EGFR, TLR3	31	2547	20472	2.85208	0.203579	0.0189455	0.0164743
GOTERM_CC_DIRECT	GO:0010008~endosome membrane	4	12.9032	0.0059187	HLA-A, TLR4, EGFR, TLR3	31	253	20472	10.4409	0.420818	0.0418862	0.0364228
GOTERM_CC_DIRECT	GO:0005796~Golgi lumen	3	9.67742	0.010511	MUC1, F2, INS	31	106	20472	18.6902	0.621725	0.0690726	0.0600631
GOTERM_CC_DIRECT	GO:0042612~MHC class I protein complex	2	6.45161	0.0131142	HLA-C, HLA-A	31	9	20472	146.753	0.703139	0.0804341	0.0699427
GOTERM_CC_DIRECT	GO:0031901~early endosome membrane	3	9.67742	0.0302345	HLA-C, HLA-A, EGFR	31	186	20472	10.6514	0.940661	0.173849	0.151173
GOTERM_CC_DIRECT	GO:0042613~MHC class II protein complex	2	6.45161	0.0374335	HLA-C, HLA-A	31	26	20472	50.799	0.970103	0.191657	0.166658
GOTERM_CC_DIRECT	GO:0043235~receptor complex	3	9.67742	0.0400542	CD8A, TLR4, EGFR	31	217	20472	9.12978	0.976735	0.191657	0.166658
GOTERM_CC_DIRECT	GO:0001891~phagocytic cup	2	6.45161	0.0402562	TNF, TLR4	31	28	20472	47.1705	0.977181	0.191657	0.166658
GOTERM_CC_DIRECT	GO:0071556~integral component of lumenal side of endoplasmic reticulum membrane	2	6.45161	0.0416645	HLA-C, HLA-A	31	29	20472	45.5439	0.980065	0.191657	0.166658
GOTERM_CC_DIRECT	GO:0012507~ER to Golgi transport vesicle membrane	2	6.45161	0.0789437	HLA-C, HLA-A	31	56	20472	23.5853	0.999482	0.345848	0.300738
GOTERM_CC_DIRECT	GO:0070062~extracellular exosome	7	22.5806	0.0990491	DPP4, ACE2, MUC1, HLA-C, TMPRSS2, HLA-A, F2	31	2218	20472	2.08418	0.999932	0.395601	0.344001

## Sheet: GO-MF
Category	Term	Count	%	PValue	Genes	List Total	Pop Hits	Pop Total	Fold Enrichment	Bonferroni	Benjamini	FDR
GOTERM_MF_DIRECT	GO:0005125~cytokine activity	8	25.8065	1.72634e-08	IL10, IL4, IL6, CSF2, IFNG, IFNB1, IL1B, TNF	31	192	18811	25.2836	2.22698e-06	2.22698e-06	2.10613e-06
GOTERM_MF_DIRECT	GO:0005515~protein binding	31	100	5.13453e-06	CRP, CSF2, CXCL8, TMPRSS2, TNF, EGFR, INS, DPP4, MUC1, NLRP3, CCR5, IL10, IFNB1, HLA-C, HLA-A, TNFRSF1B, F2, F3, IL4, ACE2, CXCL10, AR, ADAM17, IL6, IFNG, OAS1, CD8A, IL1B, IL2RA, TLR4, TLR3	31	12539	18811	1.5002	0.000662136	0.000331177	0.000313206
GOTERM_MF_DIRECT	GO:0008083~growth factor activity	5	16.129	0.000134001	IL10, IL4, IL6, CSF2, F2	31	166	18811	18.2773	0.0171387	0.00576203	0.00544936
GOTERM_MF_DIRECT	GO:0001618~virus receptor activity	4	12.9032	0.000237876	DPP4, ACE2, CCR5, EGFR	31	76	18811	31.9372	0.0302235	0.0076715	0.00725522
GOTERM_MF_DIRECT	GO:0005102~receptor binding	6	19.3548	0.000372216	DPP4, CXCL10, AR, HLA-A, F2, TLR4	31	396	18811	9.19404	0.0468898	0.00960316	0.00908206
GOTERM_MF_DIRECT	GO:0002020~protease binding	4	12.9032	0.000685617	DPP4, TNF, F3, INS	31	109	18811	22.2681	0.0846739	0.0147408	0.0139409
GOTERM_MF_DIRECT	GO:0042802~identical protein binding	10	32.2581	0.00102581	CRP, DPP4, ACE2, NLRP3, CCR5, TNF, TLR4, EGFR, TLR3, INS	31	1712	18811	3.54443	0.124007	0.0189042	0.0178783
GOTERM_MF_DIRECT	GO:0004252~serine-type endopeptidase activity	4	12.9032	0.00357212	DPP4, TMPRSS2, F2, F3	31	194	18811	12.5115	0.369744	0.0576005	0.0544749
GOTERM_MF_DIRECT	GO:0046977~TAP binding	2	6.45161	0.00477706	HLA-C, HLA-A	31	3	18811	404.538	0.460826	0.0684712	0.0647557
GOTERM_MF_DIRECT	GO:0005138~interleukin-6 receptor binding	2	6.45161	0.0111122	IL6, ADAM17	31	7	18811	173.373	0.763426	0.143347	0.135569
GOTERM_MF_DIRECT	GO:0045236~CXCR chemokine receptor binding	2	6.45161	0.0236657	CXCL10, CXCL8	31	15	18811	80.9075	0.954479	0.277534	0.262474
GOTERM_MF_DIRECT	GO:0005178~integrin binding	3	9.67742	0.0270732	ADAM17, IL1B, EGFR	31	161	18811	11.307	0.971004	0.291037	0.275244
GOTERM_MF_DIRECT	GO:0008201~heparin binding	3	9.67742	0.0318986	CXCL10, CXCL8, F2	31	176	18811	10.3433	0.984732	0.316532	0.299356
GOTERM_MF_DIRECT	GO:0004888~transmembrane signaling receptor activity	3	9.67742	0.0363348	TLR4, EGFR, TLR3	31	189	18811	9.63185	0.991557	0.3348	0.316632
GOTERM_MF_DIRECT	GO:0042605~peptide antigen binding	2	6.45161	0.0573986	HLA-C, HLA-A	31	37	18811	32.8003	0.999512	0.47492	0.449149
GOTERM_MF_DIRECT	GO:0001530~lipopolysaccharide binding	2	6.45161	0.0589048	F2, TLR4	31	38	18811	31.9372	0.999603	0.47492	0.449149
GOTERM_MF_DIRECT	GO:0015026~coreceptor activity	2	6.45161	0.0649065	CD8A, CCR5	31	42	18811	28.8955	0.999826	0.492526	0.4658
GOTERM_MF_DIRECT	GO:0008009~chemokine activity	2	6.45161	0.0767991	CXCL10, CXCL8	31	50	18811	24.2723	0.999967	0.550394	0.520527
GOTERM_MF_DIRECT	GO:0008236~serine-type peptidase activity	2	6.45161	0.0900036	DPP4, TMPRSS2	31	59	18811	20.5697	0.999995	0.611077	0.577918

## Sheet: KEGG
Category	Term	Count	%	PValue	Genes	List Total	Pop Hits	Pop Total	Fold Enrichment	Bonferroni	Benjamini	FDR
KEGG_PATHWAY	hsa05171:Coronavirus disease - COVID-19	16	51.6129	1.08564e-16	CXCL8, CSF2, IFNB1, TMPRSS2, F2, TNF, EGFR, ACE2, CXCL10, IL6, ADAM17, OAS1, IL1B, NLRP3, TLR4, TLR3	29	232	8156	19.396	1.66533e-14	1.62846e-14	9.22796e-15
KEGG_PATHWAY	hsa05164:Influenza A	12	38.7097	3.93354e-12	CXCL10, IL6, CXCL8, IFNG, OAS1, IFNB1, IL1B, NLRP3, TMPRSS2, TNF, TLR4, TLR3	29	171	8156	19.7362	5.90028e-10	2.95015e-10	1.67175e-10
KEGG_PATHWAY	hsa04060:Cytokine-cytokine receptor interaction	13	41.9355	7.2777e-11	IL10, CXCL8, CSF2, IFNB1, TNFRSF1B, TNF, IL4, CXCL10, IL6, IFNG, IL1B, IL2RA, CCR5	29	295	8156	12.3937	1.09166e-08	3.63885e-09	2.06202e-09
KEGG_PATHWAY	hsa05135:Yersinia infection	9	29.0323	1.20917e-08	IL10, IL6, CXCL8, IFNB1, CD8A, IL1B, NLRP3, TNF, TLR4	29	137	8156	18.4757	1.81375e-06	3.97423e-07	2.25207e-07
KEGG_PATHWAY	hsa05144:Malaria	7	22.5806	1.32474e-08	IL10, IL6, CXCL8, IFNG, IL1B, TNF, TLR4	29	50	8156	39.3738	1.98712e-06	3.97423e-07	2.25207e-07
KEGG_PATHWAY	hsa04657:IL-17 signaling pathway	8	25.8065	2.09478e-08	IL4, CXCL10, IL6, CXCL8, CSF2, IFNG, IL1B, TNF	29	94	8156	23.9354	3.14217e-06	5.23695e-07	2.9676e-07
KEGG_PATHWAY	hsa04061:Viral protein interaction with cytokine and cytokine receptor	8	25.8065	3.23161e-08	IL10, CXCL10, IL6, CXCL8, IL2RA, CCR5, TNFRSF1B, TNF	29	100	8156	22.4993	4.8474e-06	6.18533e-07	3.50502e-07
KEGG_PATHWAY	hsa05142:Chagas disease	8	25.8065	3.7112e-08	IL10, IL6, CXCL8, IFNG, IFNB1, IL1B, TNF, TLR4	29	102	8156	22.0581	5.56678e-06	6.18533e-07	3.50502e-07
KEGG_PATHWAY	hsa05146:Amoebiasis	8	25.8065	3.7112e-08	IL10, IL6, CXCL8, CSF2, IFNG, IL1B, TNF, TLR4	29	102	8156	22.0581	5.56678e-06	6.18533e-07	3.50502e-07
KEGG_PATHWAY	hsa04620:Toll-like receptor signaling pathway	8	25.8065	4.24979e-08	CXCL10, IL6, CXCL8, IFNB1, IL1B, TNF, TLR4, TLR3	29	104	8156	21.634	6.37466e-06	6.37468e-07	3.61232e-07
KEGG_PATHWAY	hsa05321:Inflammatory bowel disease	7	22.5806	6.6501e-08	IL10, IL4, IL6, IFNG, IL1B, TNF, TLR4	29	65	8156	30.2875	9.9751e-06	9.06832e-07	5.13871e-07
KEGG_PATHWAY	hsa05330:Allograft rejection	6	19.3548	1.51945e-07	IL10, IL4, IFNG, HLA-C, HLA-A, TNF	29	38	8156	44.4065	2.27915e-05	1.89931e-06	1.07628e-06
KEGG_PATHWAY	hsa05133:Pertussis	7	22.5806	1.71567e-07	IL10, IL6, CXCL8, IL1B, NLRP3, TNF, TLR4	29	76	8156	25.9038	2.57348e-05	1.97962e-06	1.12179e-06
KEGG_PATHWAY	hsa05332:Graft-versus-host disease	6	19.3548	2.55093e-07	IL6, IFNG, IL1B, HLA-C, HLA-A, TNF	29	42	8156	40.1773	3.82632e-05	2.73314e-06	1.54878e-06
KEGG_PATHWAY	hsa04940:Type I diabetes mellitus	6	19.3548	2.87978e-07	IFNG, IL1B, HLA-C, HLA-A, TNF, INS	29	43	8156	39.243	4.31957e-05	2.87978e-06	1.63187e-06
KEGG_PATHWAY	hsa05163:Human cytomegalovirus infection	9	29.0323	5.71847e-07	IL6, CXCL8, IFNB1, IL1B, HLA-C, HLA-A, CCR5, TNF, EGFR	29	225	8156	11.2497	8.57735e-05	5.07346e-06	2.87496e-06
KEGG_PATHWAY	hsa05323:Rheumatoid arthritis	7	22.5806	5.74992e-07	IL6, CXCL8, CSF2, IFNG, IL1B, TNF, TLR4	29	93	8156	21.1687	8.62451e-05	5.07346e-06	2.87496e-06
KEGG_PATHWAY	hsa04640:Hematopoietic cell lineage	7	22.5806	8.33532e-07	IL4, IL6, CSF2, CD8A, IL1B, IL2RA, TNF	29	99	8156	19.8858	0.000125022	6.9461e-06	3.93613e-06
KEGG_PATHWAY	hsa04630:JAK-STAT signaling pathway	8	25.8065	8.93046e-07	IL10, IL4, IL6, CSF2, IFNG, IFNB1, IL2RA, EGFR	29	162	8156	13.8885	0.000133948	7.05036e-06	3.9952e-06
KEGG_PATHWAY	hsa04668:TNF signaling pathway	7	22.5806	1.72656e-06	CXCL10, IL6, CSF2, IFNB1, IL1B, TNFRSF1B, TNF	29	112	8156	17.5776	0.000258951	1.29492e-05	7.33788e-06
KEGG_PATHWAY	hsa04621:NOD-like receptor signaling pathway	8	25.8065	2.10413e-06	IL6, CXCL8, OAS1, IFNB1, IL1B, NLRP3, TNF, TLR4	29	184	8156	12.2279	0.00031557	1.50295e-05	8.51671e-06
KEGG_PATHWAY	hsa05167:Kaposi sarcoma-associated herpesvirus infection	8	25.8065	2.99669e-06	IL6, CXCL8, CSF2, IFNB1, HLA-C, HLA-A, CCR5, TLR3	29	194	8156	11.5976	0.000449404	2.0432e-05	1.15781e-05
KEGG_PATHWAY	hsa05140:Leishmaniasis	6	19.3548	5.45533e-06	IL10, IL4, IFNG, IL1B, TNF, TLR4	29	77	8156	21.9149	0.000817968	3.55783e-05	2.0161e-05
KEGG_PATHWAY	hsa05143:African trypanosomiasis	5	16.129	6.79031e-06	IL10, IL6, IFNG, IL1B, TNF	29	37	8156	38.0056	0.00101803	4.24394e-05	2.4049e-05
KEGG_PATHWAY	hsa05160:Hepatitis C	7	22.5806	1.22694e-05	CXCL10, IFNG, OAS1, IFNB1, TNF, EGFR, TLR3	29	157	8156	12.5394	0.00183872	7.36162e-05	4.17159e-05
KEGG_PATHWAY	hsa04217:Necroptosis	7	22.5806	1.3192e-05	IFNG, IFNB1, IL1B, NLRP3, TNF, TLR4, TLR3	29	159	8156	12.3817	0.00197686	7.61079e-05	4.31278e-05
KEGG_PATHWAY	hsa05131:Shigellosis	8	25.8065	1.47383e-05	CXCL8, CSF2, IFNB1, IL1B, NLRP3, TNF, TLR4, EGFR	29	247	8156	9.10903	0.00220831	8.18792e-05	4.63982e-05
KEGG_PATHWAY	hsa04660:T cell receptor signaling pathway	6	19.3548	2.38234e-05	IL10, IL4, CSF2, IFNG, CD8A, TNF	29	104	8156	16.2255	0.00356718	0.000127625	7.23211e-05
KEGG_PATHWAY	hsa05152:Tuberculosis	7	22.5806	2.6738e-05	IL10, IL6, IFNG, IFNB1, IL1B, TNF, TLR4	29	180	8156	10.9372	0.00400272	0.0001383	7.83699e-05
KEGG_PATHWAY	hsa05134:Legionellosis	5	16.129	3.87413e-05	IL6, CXCL8, IL1B, TNF, TLR4	29	57	8156	24.6703	0.00579446	0.000193707	0.000109767
KEGG_PATHWAY	hsa05130:Pathogenic Escherichia coli infection	7	22.5806	4.44834e-05	IL6, CXCL8, IL1B, NLRP3, F2, TNF, TLR4	29	197	8156	9.99335	0.00665044	0.000215242	0.00012197
KEGG_PATHWAY	hsa05169:Epstein-Barr virus infection	7	22.5806	5.11985e-05	CXCL10, IL6, OAS1, IFNB1, HLA-C, HLA-A, TNF	29	202	8156	9.74599	0.00765056	0.000239993	0.000135996
KEGG_PATHWAY	hsa05170:Human immunodeficiency virus 1 infection	7	22.5806	6.70717e-05	IFNB1, HLA-C, HLA-A, CCR5, TNFRSF1B, TNF, TLR4	29	212	8156	9.28627	0.0100106	0.000304871	0.00017276
KEGG_PATHWAY	hsa05417:Lipid and atherosclerosis	7	22.5806	7.25334e-05	IL6, CXCL8, IFNB1, IL1B, NLRP3, TNF, TLR4	29	215	8156	9.1567	0.0108214	0.00032	0.000181333
KEGG_PATHWAY	hsa05162:Measles	6	19.3548	9.5889e-05	IL6, OAS1, IFNB1, IL1B, IL2RA, TLR4	29	139	8156	12.1399	0.0142811	0.000410953	0.000232873
KEGG_PATHWAY	hsa04936:Alcoholic liver disease	6	19.3548	0.000106103	IL6, CXCL8, IFNB1, IL1B, TNF, TLR4	29	142	8156	11.8834	0.0157904	0.000442098	0.000250522
KEGG_PATHWAY	hsa04612:Antigen processing and presentation	5	16.129	0.00013314	IFNG, CD8A, HLA-C, HLA-A, TNF	29	78	8156	18.0283	0.0197742	0.000539756	0.000305862
KEGG_PATHWAY	hsa05168:Herpes simplex virus 1 infection	9	29.0323	0.000183263	IL6, IFNG, OAS1, IFNB1, IL1B, HLA-C, HLA-A, TNF, TLR3	29	495	8156	5.11348	0.0271174	0.000723405	0.000409929
KEGG_PATHWAY	hsa05161:Hepatitis B	6	19.3548	0.000197317	IL6, CXCL8, IFNB1, TNF, TLR4, TLR3	29	162	8156	10.4163	0.0291666	0.000758911	0.000430049
KEGG_PATHWAY	hsa04933:AGE-RAGE signaling pathway in diabetic complications	5	16.129	0.000347496	IL6, CXCL8, IL1B, TNF, F3	29	100	8156	14.0621	0.0507979	0.00130311	0.00073843
KEGG_PATHWAY	hsa04625:C-type lectin receptor signaling pathway	5	16.129	0.000403658	IL10, IL6, IL1B, NLRP3, TNF	29	104	8156	13.5212	0.0587635	0.0014768	0.000836851
KEGG_PATHWAY	hsa04659:Th17 cell differentiation	5	16.129	0.000466045	IL4, IL6, IFNG, IL1B, IL2RA	29	108	8156	13.0204	0.0675344	0.00166445	0.000943186
KEGG_PATHWAY	hsa04066:HIF-1 signaling pathway	5	16.129	0.000482659	IL6, IFNG, TLR4, EGFR, INS	29	109	8156	12.901	0.0698565	0.0016837	0.000954094
KEGG_PATHWAY	hsa05145:Toxoplasmosis	5	16.129	0.000535043	IL10, IFNG, CCR5, TNF, TLR4	29	112	8156	12.5554	0.0771402	0.00182401	0.00103361
KEGG_PATHWAY	hsa05320:Autoimmune thyroid disease	4	12.9032	0.000756826	IL10, IL4, HLA-C, HLA-A	29	53	8156	21.2258	0.107355	0.00252275	0.00142956
KEGG_PATHWAY	hsa05166:Human T-cell leukemia virus 1 infection	6	19.3548	0.000841382	IL6, CSF2, IL2RA, HLA-C, HLA-A, TNF	29	222	8156	7.60112	0.118615	0.00274364	0.00155473
KEGG_PATHWAY	hsa04151:PI3K-Akt signaling pathway	7	22.5806	0.00107156	IL4, IL6, IFNB1, IL2RA, TLR4, EGFR, INS	29	354	8156	5.56127	0.148555	0.00341987	0.00193792
KEGG_PATHWAY	hsa04623:Cytosolic DNA-sensing pathway	4	12.9032	0.00125384	CXCL10, IL6, IFNB1, IL1B	29	63	8156	17.8566	0.171546	0.00391825	0.00222034
KEGG_PATHWAY	hsa05132:Salmonella infection	6	19.3548	0.00140788	IL6, CXCL8, IL1B, NLRP3, TNF, TLR4	29	249	8156	6.7769	0.190494	0.00430983	0.00244224
KEGG_PATHWAY	hsa05200:Pathways in cancer	8	25.8065	0.00169565	IL4, AR, IL6, CXCL8, IFNG, IL2RA, F2, EGFR	29	531	8156	4.23716	0.224745	0.00500246	0.00283473
KEGG_PATHWAY	hsa04622:RIG-I-like receptor signaling pathway	4	12.9032	0.00170084	CXCL10, CXCL8, IFNB1, TNF	29	70	8156	16.0709	0.225349	0.00500246	0.00283473
KEGG_PATHWAY	hsa04932:Non-alcoholic fatty liver disease	5	16.129	0.00180049	IL6, CXCL8, IL1B, TNF, INS	29	155	8156	9.0723	0.236862	0.00519371	0.0029431
KEGG_PATHWAY	hsa05215:Prostate cancer	4	12.9032	0.00430633	AR, TMPRSS2, EGFR, INS	29	97	8156	11.5976	0.476566	0.0121877	0.00690638
KEGG_PATHWAY	hsa01523:Antifolate resistance	3	9.67742	0.00465902	IL6, IL1B, TNF	29	30	8156	28.1241	0.503656	0.0129417	0.00733364
KEGG_PATHWAY	hsa05165:Human papillomavirus infection	6	19.3548	0.00485861	IFNB1, HLA-C, HLA-A, TNF, EGFR, TLR3	29	331	8156	5.09803	0.518365	0.0132508	0.00750876
KEGG_PATHWAY	hsa05310:Asthma	3	9.67742	0.0049698	IL10, IL4, TNF	29	31	8156	27.2169	0.52637	0.013312	0.00754344
KEGG_PATHWAY	hsa04064:NF-kappa B signaling pathway	4	12.9032	0.00523425	CXCL8, IL1B, TNF, TLR4	29	104	8156	10.817	0.544882	0.0137743	0.00780545
KEGG_PATHWAY	hsa04650:Natural killer cell mediated cytotoxicity	4	12.9032	0.00889698	CSF2, IFNG, IFNB1, TNF	29	126	8156	8.9283	0.73829	0.0230094	0.0130387
KEGG_PATHWAY	hsa04380:Osteoclast differentiation	4	12.9032	0.00928839	IFNG, IFNB1, IL1B, TNF	29	128	8156	8.78879	0.753346	0.0236146	0.0133816
KEGG_PATHWAY	hsa04068:FoxO signaling pathway	4	12.9032	0.0098943	IL10, IL6, EGFR, INS	29	131	8156	8.58752	0.774973	0.0246497	0.0139681
KEGG_PATHWAY	hsa04144:Endocytosis	5	16.129	0.0100242	IL2RA, HLA-C, HLA-A, CCR5, EGFR	29	251	8156	5.60242	0.779359	0.0246497	0.0139681
KEGG_PATHWAY	hsa04672:Intestinal immune network for IgA production	3	9.67742	0.0120995	IL10, IL4, IL6	29	49	8156	17.2189	0.838944	0.0292731	0.0165881
KEGG_PATHWAY	hsa04072:Phospholipase D signaling pathway	4	12.9032	0.0137615	CXCL8, F2, EGFR, INS	29	148	8156	7.60112	0.874889	0.0327654	0.018567
KEGG_PATHWAY	hsa04218:Cellular senescence	4	12.9032	0.0158412	IL6, CXCL8, HLA-C, HLA-A	29	156	8156	7.21132	0.908846	0.0371278	0.0210391
KEGG_PATHWAY	hsa04664:Fc epsilon RI signaling pathway	3	9.67742	0.0225182	IL4, CSF2, TNF	29	68	8156	12.4077	0.967168	0.051965	0.0294469
KEGG_PATHWAY	hsa05120:Epithelial cell signaling in Helicobacter pylori infection	3	9.67742	0.0237723	ADAM17, CXCL8, EGFR	29	70	8156	12.0532	0.972919	0.0540279	0.0306158
KEGG_PATHWAY	hsa05202:Transcriptional misregulation in cancer	4	12.9032	0.0276779	IL6, CXCL8, CSF2, TMPRSS2	29	193	8156	5.82884	0.985157	0.0619655	0.0351138
KEGG_PATHWAY	hsa05235:PD-L1 expression and PD-1 checkpoint pathway in cancer	3	9.67742	0.0370411	IFNG, TLR4, EGFR	29	89	8156	9.48005	0.996523	0.0817083	0.0463014
KEGG_PATHWAY	hsa04658:Th1 and Th2 cell differentiation	3	9.67742	0.0393471	IL4, IFNG, IL2RA	29	92	8156	9.17091	0.997574	0.0855372	0.0484711
KEGG_PATHWAY	hsa05010:Alzheimer disease	5	16.129	0.0405078	IL6, ADAM17, IL1B, TNF, INS	29	384	8156	3.662	0.997976	0.0868025	0.0491881
KEGG_PATHWAY	hsa04931:Insulin resistance	3	9.67742	0.0525256	IL6, TNF, INS	29	108	8156	7.81226	0.999694	0.110969	0.0628827
KEGG_PATHWAY	hsa04010:MAPK signaling pathway	4	12.9032	0.0782732	IL1B, TNF, EGFR, INS	29	294	8156	3.82641	0.999995	0.161773	0.0916714
KEGG_PATHWAY	hsa05322:Systemic lupus erythematosus	3	9.67742	0.0787296	IL10, IFNG, TNF	29	136	8156	6.20385	0.999995	0.161773	0.0916714
KEGG_PATHWAY	hsa05418:Fluid shear stress and atherosclerosis	3	9.67742	0.0817443	IFNG, IL1B, TNF	29	139	8156	6.06996	0.999997	0.165698	0.0938954
KEGG_PATHWAY	hsa04145:Phagosome	3	9.67742	0.0952128	HLA-C, HLA-A, TLR4	29	152	8156	5.55082	1	0.190426	0.107908

## Sheet: Cell membrane distribution>4
Gene Name	Plasma membrane
INS	7.5
CD8A	7.3
TNF	7.3
IL6	7.2
IL1B	7
EGFR	6.9
IL10	6.7
IL4	6.7
APOE	6.7
CXCL8	6.6
TLR4	6.6
CSF2	6.3
FCGR3A	6.1
CCR5	6
IFNG	5.8
ACE	5.8
IFNA1	5.8
TLR3	5.8
IFNB1	5.8
ADAM17	5.7
TLR7	5.7
NLRP3	5.7
CRP	5.7
CXCL10	5.6
F3	5.5
DPP4	5.5
IL2RA	5.3
HLA-A	5.2
AR	5.2
MUC1	5.2
CCR9	5.1
NRP1	5.1
ACE2	5.1
CHAT	4.6
HLA-C	4.5
IL22	4.5
CCL17	4.5
F2	4.5
TMPRSS2	4.4
TNFRSF1B	4.4
IFNA2	4
TNNI3	4
NPPB	3.9
ARNTL	3.7
OAS1	3.5
CD99	3.4
SLC6A20	3.1
PMS2	3.1
INPP5E	2.8
TAMM41	2
ABO	1.6

## Sheet: Molecular docking>6.5
Protein (Receptor)		Small molecules (Ligands)
PMS2	P54278	N-0385	-9.6
MUC1	P15941	N-0385	-8.9
ACE	P12821	N-0385	-8.7
CCR5	P51681	N-0385	-8.6
NLRP3	Q96P20	N-0385	-8.6
DPP4	P27487	N-0385	-8.4
TAMM41	Q96BW9	N-0385	-8.3
ADAM17	P78536	N-0385	-8.2
F2	P00734	N-0385	-8.1
IL2RA	P01589	N-0385	-8.1
HLA-C	P10321	N-0385	-8.1
SLC6A20	Q9NP91	N-0385	-8
AR	P10275	N-0385	-7.9
NRP1	O14786	N-0385	-7.8
TNFRSF1B	P20333	N-0385	-7.8
EGFR	P00533	N-0385	-7.7
TLR7	Q9NYK1	N-0385	-7.7
ARNTL	O00327	N-0385	-7.6
HLA-A	P04439	N-0385	-7.6
CHAT	P28329	N-0385	-7.6
CCR9	P51686	N-0385	-7.4
ACE2	Q9BYF1	N-0385	-7.3
IL10	P22301	N-0385	-7.2
INPP5E	Q10713	N-0385	-7.2
TMPRSS2	O15393	N-0385	-6.8
OAS1	P00973	N-0385	-6.8
IFNA2	P01563	N-0385	-6.8
INS	P01308	N-0385	-6.7
IFNG	P01579	N-0385	-6.7
FCGR3A	P08637	N-0385	-6.7
ABO	P16442	N-0385	-6.6
TLR4	O00206	N-0385	-6.5
IFNA1	P01562	N-0385	-6.5
CD8A	P01732	N-0385	-6.5
CRP	P02741	N-0385	-6.5
IFNB1	P01574	N-0385	-6.4
APOE	P02649	N-0385	-6.3
TLR3	O15455	N-0385	-6.2
IL6	P05231	N-0385	-6.2
IL1B	P01584	N-0385	-6.1
CXCL10	P02778	N-0385	-6.1
NPPB	P16860	N-0385	-6
TNNI3	P19429	N-0385	-5.9
IL22	Q9GZX6	N-0385	-5.9
CSF2	P04141	N-0385	-5.8
F3	P13726	N-0385	-5.8
TNF	P01375	N-0385	-5.7
CD99	P14209	N-0385	-5.7
IL4	P05112	N-0385	-5.5
CCL17	Q92583	N-0385	-5.4
CXCL8	P10145	N-0385	-5.3

## Sheet: Intersection targets-Genecards
Gene Symbol	Description	Category	Gifts	GC Id	Relevance score	GeneCards Link
ACE2	Angiotensin Converting Enzyme 2	Protein Coding	48	GC0XM015494	33.9336	https://www.genecards.org/cgi-bin/carddisp.pl?gene=ACE2
TLR7	Toll Like Receptor 7	Protein Coding	46	GC0XP012867	23.9783	https://www.genecards.org/cgi-bin/carddisp.pl?gene=TLR7
IL6	Interleukin 6	Protein Coding	48	GC07P022725	22.2499	https://www.genecards.org/cgi-bin/carddisp.pl?gene=IL6
TMPRSS2	Transmembrane Serine Protease 2	Protein Coding	45	GC21M041464	19.6073	https://www.genecards.org/cgi-bin/carddisp.pl?gene=TMPRSS2
CRP	C-Reactive Protein	Protein Coding	45	GC01M159725	15.9421	https://www.genecards.org/cgi-bin/carddisp.pl?gene=CRP
TNNI3	Troponin I3, Cardiac Type	Protein Coding	48	GC19M055151	14.5716	https://www.genecards.org/cgi-bin/carddisp.pl?gene=TNNI3
TNF	Tumor Necrosis Factor	Protein Coding	50	GC06P076864	14.3125	https://www.genecards.org/cgi-bin/carddisp.pl?gene=TNF
IL10	Interleukin 10	Protein Coding	46	GC01M206767	13.3748	https://www.genecards.org/cgi-bin/carddisp.pl?gene=IL10
NLRP3	NLR Family Pyrin Domain Containing 3	Protein Coding	46	GC01P247415	13.0805	https://www.genecards.org/cgi-bin/carddisp.pl?gene=NLRP3
F3	Coagulation Factor III, Tissue Factor	Protein Coding	45	GC01M094570	12.959	https://www.genecards.org/cgi-bin/carddisp.pl?gene=F3
DPP4	Dipeptidyl Peptidase 4	Protein Coding	49	GC02M161992	12.4113	https://www.genecards.org/cgi-bin/carddisp.pl?gene=DPP4
HLA-A	Major Histocompatibility Complex, Class I, A	Protein Coding	46	GC06P076821	11.8153	https://www.genecards.org/cgi-bin/carddisp.pl?gene=HLA-A
IL4	Interleukin 4	Protein Coding	45	GC05P132673	11.8151	https://www.genecards.org/cgi-bin/carddisp.pl?gene=IL4
ACE	Angiotensin I Converting Enzyme	Protein Coding	50	GC17P063477	11.7299	https://www.genecards.org/cgi-bin/carddisp.pl?gene=ACE
TLR4	Toll Like Receptor 4	Protein Coding	50	GC09P117704	11.682	https://www.genecards.org/cgi-bin/carddisp.pl?gene=TLR4
APOE	Apolipoprotein E	Protein Coding	50	GC19P051999	11.6413	https://www.genecards.org/cgi-bin/carddisp.pl?gene=APOE
IFNA2	Interferon Alpha 2	Protein Coding	42	GC09M021384	11.3755	https://www.genecards.org/cgi-bin/carddisp.pl?gene=IFNA2
NRP1	Neuropilin 1	Protein Coding	45	GC10M033177	11.105	https://www.genecards.org/cgi-bin/carddisp.pl?gene=NRP1
ABO	ABO, Alpha 1-3-N-Acetylgalactosaminyltransferase And Alpha 1-3-Galactosyltransferase	Protein Coding	37	GC09M133250	10.9149	https://www.genecards.org/cgi-bin/carddisp.pl?gene=ABO
HLA-C	Major Histocompatibility Complex, Class I, C	Protein Coding	45	GC06M061260	10.7133	https://www.genecards.org/cgi-bin/carddisp.pl?gene=HLA-C
IL2RA	Interleukin 2 Receptor Subunit Alpha	Protein Coding	49	GC10M006010	10.7027	https://www.genecards.org/cgi-bin/carddisp.pl?gene=IL2RA
AR	Androgen Receptor	Protein Coding	51	GC0XP067544	10.3707	https://www.genecards.org/cgi-bin/carddisp.pl?gene=AR
NPPB	Natriuretic Peptide B	Protein Coding	43	GC01M011858	9.98545	https://www.genecards.org/cgi-bin/carddisp.pl?gene=NPPB
IL1B	Interleukin 1 Beta	Protein Coding	46	GC02M112829	9.87245	https://www.genecards.org/cgi-bin/carddisp.pl?gene=IL1B
LOC117134593	ACE2 Promoter Region	Biological Region	2	GC0XP015600	9.68434	https://www.genecards.org/cgi-bin/carddisp.pl?gene=LOC117134593
EGFR	Epidermal Growth Factor Receptor	Protein Coding	52	GC07P055019	9.59044	https://www.genecards.org/cgi-bin/carddisp.pl?gene=EGFR
OAS1	2'-5'-Oligoadenylate Synthetase 1	Protein Coding	44	GC12P112918	9.39343	https://www.genecards.org/cgi-bin/carddisp.pl?gene=OAS1
SLC6A20	Solute Carrier Family 6 Member 20	Protein Coding	41	GC03M045755	9.18124	https://www.genecards.org/cgi-bin/carddisp.pl?gene=SLC6A20
LOC117135106	TMPRSS2 Androgen Receptor-Responsive -60 Kb Enhancer	Biological Region	2	GC21P041568	8.98646	https://www.genecards.org/cgi-bin/carddisp.pl?gene=LOC117135106
LOC117134608	TMPRSS2 Androgen Receptor-Responsive -13 Kb Enhancer	Biological Region	2	GC21P041519	8.98646	https://www.genecards.org/cgi-bin/carddisp.pl?gene=LOC117134608
LOC117134604	TMPRSS2 Promoter Region	Biological Region	2	GC21P041507	8.98017	https://www.genecards.org/cgi-bin/carddisp.pl?gene=LOC117134604
LOC112679198	ABO +5.8 Intron 1 Enhancer	Biological Region	2	GC09P133267	8.89809	https://www.genecards.org/cgi-bin/carddisp.pl?gene=LOC112679198
IL22	Interleukin 22	Protein Coding	41	GC12M068248	8.80221	https://www.genecards.org/cgi-bin/carddisp.pl?gene=IL22
ARNTL	Aryl Hydrocarbon Receptor Nuclear Translocator Like	Protein Coding	41	GC11P013276	8.65159	https://www.genecards.org/cgi-bin/carddisp.pl?gene=ARNTL
F2	Coagulation Factor II, Thrombin	Protein Coding	48	GC11P046720	8.46279	https://www.genecards.org/cgi-bin/carddisp.pl?gene=F2
ADAM17	ADAM Metallopeptidase Domain 17	Protein Coding	50	GC02M009488	8.36421	https://www.genecards.org/cgi-bin/carddisp.pl?gene=ADAM17
IFNG	Interferon Gamma	Protein Coding	47	GC12M068154	8.07784	https://www.genecards.org/cgi-bin/carddisp.pl?gene=IFNG
CCR9	C-C Motif Chemokine Receptor 9	Protein Coding	40	GC03P046268	7.87815	https://www.genecards.org/cgi-bin/carddisp.pl?gene=CCR9
IFNB1	Interferon Beta 1	Protein Coding	42	GC09M021077	7.58944	https://www.genecards.org/cgi-bin/carddisp.pl?gene=IFNB1
IFNA1	Interferon Alpha 1	Protein Coding	40	GC09P021577	7.4002	https://www.genecards.org/cgi-bin/carddisp.pl?gene=IFNA1
CD99	CD99 Molecule (Xg Blood Group)	Protein Coding	39	GC0XP002691	6.41895	https://www.genecards.org/cgi-bin/carddisp.pl?gene=CD99
INS	Insulin	Protein Coding	46	GC11M002159	6.31271	https://www.genecards.org/cgi-bin/carddisp.pl?gene=INS
CD8A	CD8a Molecule	Protein Coding	45	GC02M086784	6.20338	https://www.genecards.org/cgi-bin/carddisp.pl?gene=CD8A
CCL17	C-C Motif Chemokine Ligand 17	Protein Coding	38	GC16P057411	6.13634	https://www.genecards.org/cgi-bin/carddisp.pl?gene=CCL17
CSF2	Colony Stimulating Factor 2	Protein Coding	42	GC05P132073	6.09223	https://www.genecards.org/cgi-bin/carddisp.pl?gene=CSF2
FCGR3A	Fc Gamma Receptor IIIa	Protein Coding	44	GC01M161541	6.05789	https://www.genecards.org/cgi-bin/carddisp.pl?gene=FCGR3A
TNFRSF1B	TNF Receptor Superfamily Member 1B	Protein Coding	46	GC01P012167	5.96407	https://www.genecards.org/cgi-bin/carddisp.pl?gene=TNFRSF1B
TAMM41	TAM41 Mitochondrial Translocator Assembly And Maintenance Homolog	Protein Coding	33	GC03M011721	5.80087	https://www.genecards.org/cgi-bin/carddisp.pl?gene=TAMM41
TLR3	Toll Like Receptor 3	Protein Coding	50	GC04P186059	5.73622	https://www.genecards.org/cgi-bin/carddisp.pl?gene=TLR3
CCR5	C-C Motif Chemokine Receptor 5	Protein Coding	45	GC03P046383	5.48104	https://www.genecards.org/cgi-bin/carddisp.pl?gene=CCR5
MUC1	Mucin 1, Cell Surface Associated	Protein Coding	48	GC01M155185	5.46882	https://www.genecards.org/cgi-bin/carddisp.pl?gene=MUC1
CXCL10	C-X-C Motif Chemokine Ligand 10	Protein Coding	43	GC04M076021	5.44137	https://www.genecards.org/cgi-bin/carddisp.pl?gene=CXCL10
PMS2	PMS1 Homolog 2, Mismatch Repair System Component	Protein Coding	48	GC07M005973	5.3268	https://www.genecards.org/cgi-bin/carddisp.pl?gene=PMS2
CHAT	Choline O-Acetyltransferase	Protein Coding	47	GC10P049609	5.3268	https://www.genecards.org/cgi-bin/carddisp.pl?gene=CHAT
INPP5E	Inositol Polyphosphate-5-Phosphatase E	Protein Coding	41	GC09M136428	5.3268	https://www.genecards.org/cgi-bin/carddisp.pl?gene=INPP5E
CXCL8	C-X-C Motif Chemokine Ligand 8	Protein Coding	40	GC04P073740	5.09742	https://www.genecards.org/cgi-bin/carddisp.pl?gene=CXCL8
HLA-B	Major Histocompatibility Complex, Class I, B	Protein Coding	46	GC06M061261	4.93932	https://www.genecards.org/cgi-bin/carddisp.pl?gene=HLA-B
IRF7	Interferon Regulatory Factor 7	Protein Coding	47	GC11M000612	4.93867	https://www.genecards.org/cgi-bin/carddisp.pl?gene=IRF7
CXCR6	C-X-C Motif Chemokine Receptor 6	Protein Coding	39	GC03P046271	4.91469	https://www.genecards.org/cgi-bin/carddisp.pl?gene=CXCR6
FURIN	Furin, Paired Basic Amino Acid Cleaving Enzyme	Protein Coding	45	GC15P090868	4.85404	https://www.genecards.org/cgi-bin/carddisp.pl?gene=FURIN
CD4	CD4 Molecule	Protein Coding	48	GC12P006786	4.83116	https://www.genecards.org/cgi-bin/carddisp.pl?gene=CD4
FCRL5	Fc Receptor Like 5	Protein Coding	38	GC01M157514	4.83116	https://www.genecards.org/cgi-bin/carddisp.pl?gene=FCRL5
IFNAR2	Interferon Alpha And Beta Receptor Subunit 2	Protein Coding	48	GC21P033229	4.79826	https://www.genecards.org/cgi-bin/carddisp.pl?gene=IFNAR2
BSG	Basigin (Ok Blood Group)	Protein Coding	43	GC19P000571	4.79502	https://www.genecards.org/cgi-bin/carddisp.pl?gene=BSG
TNFRSF1A	TNF Receptor Superfamily Member 1A	Protein Coding	48	GC12M006328	4.77659	https://www.genecards.org/cgi-bin/carddisp.pl?gene=TNFRSF1A
TLR2	Toll Like Receptor 2	Protein Coding	50	GC04P153684	4.70405	https://www.genecards.org/cgi-bin/carddisp.pl?gene=TLR2
ALB	Albumin	Protein Coding	49	GC04P073397	4.67001	https://www.genecards.org/cgi-bin/carddisp.pl?gene=ALB
IRF3	Interferon Regulatory Factor 3	Protein Coding	45	GC19M049659	4.53757	https://www.genecards.org/cgi-bin/carddisp.pl?gene=IRF3
ADM	Adrenomedullin	Protein Coding	44	GC11P010304	4.53119	https://www.genecards.org/cgi-bin/carddisp.pl?gene=ADM
VWF	Von Willebrand Factor	Protein Coding	48	GC12M005917	4.48974	https://www.genecards.org/cgi-bin/carddisp.pl?gene=VWF
LY6D	Lymphocyte Antigen 6 Family Member D	Protein Coding	36	GC08M142784	4.46173	https://www.genecards.org/cgi-bin/carddisp.pl?gene=LY6D
C11orf71	Chromosome 11 Open Reading Frame 71	Protein Coding	29	GC11M114391	4.46173	https://www.genecards.org/cgi-bin/carddisp.pl?gene=C11orf71
CCL2	C-C Motif Chemokine Ligand 2	Protein Coding	47	GC17P034255	4.20435	https://www.genecards.org/cgi-bin/carddisp.pl?gene=CCL2
IL17A	Interleukin 17A	Protein Coding	41	GC06P052186	4.10438	https://www.genecards.org/cgi-bin/carddisp.pl?gene=IL17A
ADAMTS13	ADAM Metallopeptidase With Thrombospondin Type 1 Motif 13	Protein Coding	48	GC09P133414	4.07752	https://www.genecards.org/cgi-bin/carddisp.pl?gene=ADAMTS13
IFITM3	Interferon Induced Transmembrane Protein 3	Protein Coding	41	GC11M000319	3.97952	https://www.genecards.org/cgi-bin/carddisp.pl?gene=IFITM3
S100A8	S100 Calcium Binding Protein A8	Protein Coding	42	GC01M153391	3.95926	https://www.genecards.org/cgi-bin/carddisp.pl?gene=S100A8
HSPA5	Heat Shock Protein Family A (Hsp70) Member 5	Protein Coding	46	GC09M125234	3.87724	https://www.genecards.org/cgi-bin/carddisp.pl?gene=HSPA5
SERPINE1	Serpin Family E Member 1	Protein Coding	49	GC07P101127	3.8634	https://www.genecards.org/cgi-bin/carddisp.pl?gene=SERPINE1
NRP2	Neuropilin 2	Protein Coding	45	GC02P205681	3.82368	https://www.genecards.org/cgi-bin/carddisp.pl?gene=NRP2
LOC119086083	CCR9 Promoter Region	Biological Region	1	GC03P045885	3.78346	https://www.genecards.org/cgi-bin/carddisp.pl?gene=LOC119086083
SERPINA1	Serpin Family A Member 1	Protein Coding	48	GC14M094376	3.75967	https://www.genecards.org/cgi-bin/carddisp.pl?gene=SERPINA1
DDX58	DExD/H-Box Helicase 58	Protein Coding	46	GC09M032455	3.72477	https://www.genecards.org/cgi-bin/carddisp.pl?gene=DDX58
PLAUR	Plasminogen Activator, Urokinase Receptor	Protein Coding	44	GC19M043646	3.72309	https://www.genecards.org/cgi-bin/carddisp.pl?gene=PLAUR
CALCA	Calcitonin Related Polypeptide Alpha	Protein Coding	44	GC11M014945	3.71535	https://www.genecards.org/cgi-bin/carddisp.pl?gene=CALCA
IL7	Interleukin 7	Protein Coding	41	GC08M078689	3.67357	https://www.genecards.org/cgi-bin/carddisp.pl?gene=IL7
HIF1A	Hypoxia Inducible Factor 1 Subunit Alpha	Protein Coding	46	GC14P061695	3.66605	https://www.genecards.org/cgi-bin/carddisp.pl?gene=HIF1A
HMOX1	Heme Oxygenase 1	Protein Coding	50	GC22P035380	3.65838	https://www.genecards.org/cgi-bin/carddisp.pl?gene=HMOX1
MAVS	Mitochondrial Antiviral Signaling Protein	Protein Coding	38	GC20P003907	3.63859	https://www.genecards.org/cgi-bin/carddisp.pl?gene=MAVS
CTSL	Cathepsin L	Protein Coding	46	GC09P087725	3.63371	https://www.genecards.org/cgi-bin/carddisp.pl?gene=CTSL
IL18	Interleukin 18	Protein Coding	42	GC11M112143	3.6279	https://www.genecards.org/cgi-bin/carddisp.pl?gene=IL18
TBK1	TANK Binding Kinase 1	Protein Coding	48	GC12P064451	3.60977	https://www.genecards.org/cgi-bin/carddisp.pl?gene=TBK1
FYCO1	FYVE And Coiled-Coil Domain Autophagy Adaptor 1	Protein Coding	40	GC03M045917	3.59084	https://www.genecards.org/cgi-bin/carddisp.pl?gene=FYCO1
IFIH1	Interferon Induced With Helicase C Domain 1	Protein Coding	45	GC02M162267	3.58713	https://www.genecards.org/cgi-bin/carddisp.pl?gene=IFIH1
RAB7A	RAB7A, Member RAS Oncogene Family	Protein Coding	46	GC03P133360	3.5489	https://www.genecards.org/cgi-bin/carddisp.pl?gene=RAB7A
LZTFL1	Leucine Zipper Transcription Factor Like 1	Protein Coding	38	GC03M045823	3.54862	https://www.genecards.org/cgi-bin/carddisp.pl?gene=LZTFL1
SFTPD	Surfactant Protein D	Protein Coding	43	GC10M079937	3.52924	https://www.genecards.org/cgi-bin/carddisp.pl?gene=SFTPD
TGFB1	Transforming Growth Factor Beta 1	Protein Coding	50	GC19M041301	3.49991	https://www.genecards.org/cgi-bin/carddisp.pl?gene=TGFB1
TREM1	Triggering Receptor Expressed On Myeloid Cells 1	Protein Coding	40	GC06M041267	3.49883	https://www.genecards.org/cgi-bin/carddisp.pl?gene=TREM1
STAT1	Signal Transducer And Activator Of Transcription 1	Protein Coding	51	GC02M190908	3.39024	https://www.genecards.org/cgi-bin/carddisp.pl?gene=STAT1
F5	Coagulation Factor V	Protein Coding	46	GC01M169511	3.37092	https://www.genecards.org/cgi-bin/carddisp.pl?gene=F5
S100A9	S100 Calcium Binding Protein A9	Protein Coding	42	GC01P153357	3.36691	https://www.genecards.org/cgi-bin/carddisp.pl?gene=S100A9
LOC117134611	TMPRSS2 -17 Kb Enhancer	Biological Region	1	GC21P041525	3.33121	https://www.genecards.org/cgi-bin/carddisp.pl?gene=LOC117134611
LOC117135104	TMPRSS2 E3 Enhancer	Biological Region	1	GC21P041529	3.33121	https://www.genecards.org/cgi-bin/carddisp.pl?gene=LOC117135104
LOC117135105	TMPRSS2 E4 Enhancer	Biological Region	1	GC21P041535	3.33121	https://www.genecards.org/cgi-bin/carddisp.pl?gene=LOC117135105
LOC117134605	TMPRSS2 Repressive Element NBS1	Biological Region	1	GC21P041510	3.33121	https://www.genecards.org/cgi-bin/carddisp.pl?gene=LOC117134605
LOC117134606	TMPRSS2 Repressive Element NBS2	Biological Region	1	GC21P041511	3.33121	https://www.genecards.org/cgi-bin/carddisp.pl?gene=LOC117134606
LOC117134607	TMPRSS2 Repressive Element NBS4	Biological Region	1	GC21P041518	3.33121	https://www.genecards.org/cgi-bin/carddisp.pl?gene=LOC117134607
EDN1	Endothelin 1	Protein Coding	48	GC06P012256	3.31964	https://www.genecards.org/cgi-bin/carddisp.pl?gene=EDN1
MUC5AC	Mucin 5AC, Oligomeric Mucus/Gel-Forming	Protein Coding	39	GC11P001581	3.31542	https://www.genecards.org/cgi-bin/carddisp.pl?gene=MUC5AC
MBL2	Mannose Binding Lectin 2	Protein Coding	46	GC10M052760	3.30219	https://www.genecards.org/cgi-bin/carddisp.pl?gene=MBL2
HMGB1	High Mobility Group Box 1	Protein Coding	44	GC13M030456	3.28654	https://www.genecards.org/cgi-bin/carddisp.pl?gene=HMGB1
CD209	CD209 Molecule	Protein Coding	42	GC19M007739	3.27859	https://www.genecards.org/cgi-bin/carddisp.pl?gene=CD209
AGT	Angiotensinogen	Protein Coding	48	GC01M230702	3.27571	https://www.genecards.org/cgi-bin/carddisp.pl?gene=AGT
PRF1	Perforin 1	Protein Coding	45	GC10M070597	3.22705	https://www.genecards.org/cgi-bin/carddisp.pl?gene=PRF1
SDC1	Syndecan 1	Protein Coding	42	GC02M020200	3.22021	https://www.genecards.org/cgi-bin/carddisp.pl?gene=SDC1
FAS	Fas Cell Surface Death Receptor	Protein Coding	49	GC10P090723	3.19849	https://www.genecards.org/cgi-bin/carddisp.pl?gene=FAS
IL13	Interleukin 13	Protein Coding	42	GC05P132656	3.17528	https://www.genecards.org/cgi-bin/carddisp.pl?gene=IL13
CCL5	C-C Motif Chemokine Ligand 5	Protein Coding	42	GC17M035871	3.14094	https://www.genecards.org/cgi-bin/carddisp.pl?gene=CCL5
ELANE	Elastase, Neutrophil Expressed	Protein Coding	48	GC19P002165	3.13235	https://www.genecards.org/cgi-bin/carddisp.pl?gene=ELANE
AAK1	AP2 Associated Kinase 1	Protein Coding	41	GC02M069459	3.09943	https://www.genecards.org/cgi-bin/carddisp.pl?gene=AAK1
ANGPT2	Angiopoietin 2	Protein Coding	46	GC08M006499	3.06301	https://www.genecards.org/cgi-bin/carddisp.pl?gene=ANGPT2
PTX3	Pentraxin 3	Protein Coding	42	GC03P157436	3.06301	https://www.genecards.org/cgi-bin/carddisp.pl?gene=PTX3
CD14	CD14 Molecule	Protein Coding	45	GC05M140631	3.04351	https://www.genecards.org/cgi-bin/carddisp.pl?gene=CD14
TLR8	Toll Like Receptor 8	Protein Coding	47	GC0XP012924	3.04274	https://www.genecards.org/cgi-bin/carddisp.pl?gene=TLR8
OAS3	2'-5'-Oligoadenylate Synthetase 3	Protein Coding	40	GC12P112938	3.0055	https://www.genecards.org/cgi-bin/carddisp.pl?gene=OAS3
AVP	Arginine Vasopressin	Protein Coding	45	GC20M003082	2.92013	https://www.genecards.org/cgi-bin/carddisp.pl?gene=AVP
IL10RB	Interleukin 10 Receptor Subunit Beta	Protein Coding	44	GC21P033266	2.91602	https://www.genecards.org/cgi-bin/carddisp.pl?gene=IL10RB
SLC6A19	Solute Carrier Family 6 Member 19	Protein Coding	45	GC05P001201	2.88613	https://www.genecards.org/cgi-bin/carddisp.pl?gene=SLC6A19
XCR1	X-C Motif Chemokine Receptor 1	Protein Coding	37	GC03M046016	2.8758	https://www.genecards.org/cgi-bin/carddisp.pl?gene=XCR1
CCL3	C-C Motif Chemokine Ligand 3	Protein Coding	38	GC17M036088	2.85746	https://www.genecards.org/cgi-bin/carddisp.pl?gene=CCL3
SIGLEC1	Sialic Acid Binding Ig Like Lectin 1	Protein Coding	40	GC20M003686	2.85267	https://www.genecards.org/cgi-bin/carddisp.pl?gene=SIGLEC1
ZC3HAV1	Zinc Finger CCCH-Type Containing, Antiviral 1	Protein Coding	38	GC07M139044	2.84714	https://www.genecards.org/cgi-bin/carddisp.pl?gene=ZC3HAV1
JAK1	Janus Kinase 1	Protein Coding	52	GC01M064833	2.83506	https://www.genecards.org/cgi-bin/carddisp.pl?gene=JAK1
SFTPB	Surfactant Protein B	Protein Coding	44	GC02M085657	2.81848	https://www.genecards.org/cgi-bin/carddisp.pl?gene=SFTPB
VPS39	VPS39 Subunit Of HOPS Complex	Protein Coding	38	GC15M042159	2.78585	https://www.genecards.org/cgi-bin/carddisp.pl?gene=VPS39
AGTR2	Angiotensin II Receptor Type 2	Protein Coding	43	GC0XP116170	2.78262	https://www.genecards.org/cgi-bin/carddisp.pl?gene=AGTR2
SELP	Selectin P	Protein Coding	45	GC01M169558	2.77829	https://www.genecards.org/cgi-bin/carddisp.pl?gene=SELP
LOC118966792	DACE2 Interferon-Inducible Promoter Region	Biological Region	1	GC0XP015580	2.76611	https://www.genecards.org/cgi-bin/carddisp.pl?gene=LOC118966792
MYD88	MYD88 Innate Immune Signal Transduction Adaptor	Protein Coding	49	GC03P038139	2.7604	https://www.genecards.org/cgi-bin/carddisp.pl?gene=MYD88
NFE2L2	NFE2 Like BZIP Transcription Factor 2	Protein Coding	48	GC02M177227	2.73035	https://www.genecards.org/cgi-bin/carddisp.pl?gene=NFE2L2
CCR1	C-C Motif Chemokine Receptor 1	Protein Coding	45	GC03M046218	2.71452	https://www.genecards.org/cgi-bin/carddisp.pl?gene=CCR1
ITM2B	Integral Membrane Protein 2B	Protein Coding	43	GC13P048233	2.70538	https://www.genecards.org/cgi-bin/carddisp.pl?gene=ITM2B
LOC117600004	CTSL Promoter Region	Biological Region	1	GC09P087724	2.69646	https://www.genecards.org/cgi-bin/carddisp.pl?gene=LOC117600004
CLEC4M	C-Type Lectin Domain Family 4 Member M	Protein Coding	40	GC19P007763	2.68954	https://www.genecards.org/cgi-bin/carddisp.pl?gene=CLEC4M
SERPING1	Serpin Family G Member 1	Protein Coding	46	GC11P057597	2.67246	https://www.genecards.org/cgi-bin/carddisp.pl?gene=SERPING1
PDCD1	Programmed Cell Death 1	Protein Coding	46	GC02M241849	2.66415	https://www.genecards.org/cgi-bin/carddisp.pl?gene=PDCD1
IFNL1	Interferon Lambda 1	Protein Coding	34	GC19P039296	2.65849	https://www.genecards.org/cgi-bin/carddisp.pl?gene=IFNL1
CD163	CD163 Molecule	Protein Coding	43	GC12M007646	2.65714	https://www.genecards.org/cgi-bin/carddisp.pl?gene=CD163
SERPINC1	Serpin Family C Member 1	Protein Coding	47	GC01M174490	2.64559	https://www.genecards.org/cgi-bin/carddisp.pl?gene=SERPINC1
APOL1	Apolipoprotein L1	Protein Coding	44	GC22P036253	2.63815	https://www.genecards.org/cgi-bin/carddisp.pl?gene=APOL1
FLT1	Fms Related Receptor Tyrosine Kinase 1	Protein Coding	50	GC13M028300	2.62414	https://www.genecards.org/cgi-bin/carddisp.pl?gene=FLT1
IFNAR1	Interferon Alpha And Beta Receptor Subunit 1	Protein Coding	45	GC21P033324	2.61033	https://www.genecards.org/cgi-bin/carddisp.pl?gene=IFNAR1
ALOX5	Arachidonate 5-Lipoxygenase	Protein Coding	48	GC10P045374	2.60856	https://www.genecards.org/cgi-bin/carddisp.pl?gene=ALOX5
ADIPOQ	Adiponectin, C1Q And Collagen Domain Containing	Protein Coding	45	GC03P186842	2.60856	https://www.genecards.org/cgi-bin/carddisp.pl?gene=ADIPOQ
GPT	Glutamic--Pyruvic Transaminase	Protein Coding	41	GC08P144502	2.59428	https://www.genecards.org/cgi-bin/carddisp.pl?gene=GPT
IL2	Interleukin 2	Protein Coding	44	GC04M122451	2.58199	https://www.genecards.org/cgi-bin/carddisp.pl?gene=IL2
EPO	Erythropoietin	Protein Coding	41	GC07P100720	2.55343	https://www.genecards.org/cgi-bin/carddisp.pl?gene=EPO
PF4	Platelet Factor 4	Protein Coding	40	GC04M073980	2.55343	https://www.genecards.org/cgi-bin/carddisp.pl?gene=PF4
ERVW-1	Endogenous Retrovirus Group W Member 1, Envelope	Protein Coding	34	GC07M092468	2.55343	https://www.genecards.org/cgi-bin/carddisp.pl?gene=ERVW-1
LPA	Lipoprotein(A)	Protein Coding	42	GC06M160531	2.55145	https://www.genecards.org/cgi-bin/carddisp.pl?gene=LPA
MPO	Myeloperoxidase	Protein Coding	50	GC17M058269	2.52238	https://www.genecards.org/cgi-bin/carddisp.pl?gene=MPO
KNG1	Kininogen 1	Protein Coding	46	GC03P186717	2.51263	https://www.genecards.org/cgi-bin/carddisp.pl?gene=KNG1
IL33	Interleukin 33	Protein Coding	38	GC09P006350	2.51263	https://www.genecards.org/cgi-bin/carddisp.pl?gene=IL33
RAB1B	RAB1B, Member RAS Oncogene Family	Protein Coding	41	GC11P069053	2.50901	https://www.genecards.org/cgi-bin/carddisp.pl?gene=RAB1B
ARF5	ADP Ribosylation Factor 5	Protein Coding	39	GC07P127588	2.50901	https://www.genecards.org/cgi-bin/carddisp.pl?gene=ARF5
TLR9	Toll Like Receptor 9	Protein Coding	45	GC03M052222	2.50841	https://www.genecards.org/cgi-bin/carddisp.pl?gene=TLR9
ICOSLG	Inducible T Cell Costimulator Ligand	Protein Coding	39	GC21M044222	2.50841	https://www.genecards.org/cgi-bin/carddisp.pl?gene=ICOSLG
CCL4	C-C Motif Chemokine Ligand 4	Protein Coding	38	GC17P036103	2.48804	https://www.genecards.org/cgi-bin/carddisp.pl?gene=CCL4
STAT3	Signal Transducer And Activator Of Transcription 3	Protein Coding	50	GC17M042313	2.44979	https://www.genecards.org/cgi-bin/carddisp.pl?gene=STAT3
TTR	Transthyretin	Protein Coding	48	GC18P031557	2.44905	https://www.genecards.org/cgi-bin/carddisp.pl?gene=TTR
ERG	ETS Transcription Factor ERG	Protein Coding	45	GC21M038367	2.42354	https://www.genecards.org/cgi-bin/carddisp.pl?gene=ERG
TAS2R1	Taste 2 Receptor Member 1	Protein Coding	37	GC05M009630	2.42354	https://www.genecards.org/cgi-bin/carddisp.pl?gene=TAS2R1
VAMP8	Vesicle Associated Membrane Protein 8	Protein Coding	40	GC02P085561	2.42321	https://www.genecards.org/cgi-bin/carddisp.pl?gene=VAMP8
VDR	Vitamin D Receptor	Protein Coding	50	GC12M047841	2.40928	https://www.genecards.org/cgi-bin/carddisp.pl?gene=VDR
IL1A	Interleukin 1 Alpha	Protein Coding	43	GC02M112773	2.40281	https://www.genecards.org/cgi-bin/carddisp.pl?gene=IL1A
CXCL1	C-X-C Motif Chemokine Ligand 1	Protein Coding	41	GC04P073869	2.40281	https://www.genecards.org/cgi-bin/carddisp.pl?gene=CXCL1
CXCL2	C-X-C Motif Chemokine Ligand 2	Protein Coding	39	GC04M074097	2.40281	https://www.genecards.org/cgi-bin/carddisp.pl?gene=CXCL2
VPS41	VPS41 Subunit Of HOPS Complex	Protein Coding	39	GC07M039001	2.39466	https://www.genecards.org/cgi-bin/carddisp.pl?gene=VPS41
LINC02967	Long Intergenic Non-Protein Coding RNA 2967	RNA Gene	4	GC20P024920	2.39017	https://www.genecards.org/cgi-bin/carddisp.pl?gene=LINC02967
G6PD	Glucose-6-Phosphate Dehydrogenase	Protein Coding	49	GC0XM154531	2.38671	https://www.genecards.org/cgi-bin/carddisp.pl?gene=G6PD
SCGB1A1	Secretoglobin Family 1A Member 1	Protein Coding	40	GC11P062405	2.37967	https://www.genecards.org/cgi-bin/carddisp.pl?gene=SCGB1A1
MTHFR	Methylenetetrahydrofolate Reductase	Protein Coding	48	GC01M011785	2.36175	https://www.genecards.org/cgi-bin/carddisp.pl?gene=MTHFR
IL6R	Interleukin 6 Receptor	Protein Coding	48	GC01P154405	2.36175	https://www.genecards.org/cgi-bin/carddisp.pl?gene=IL6R
ENPEP	Glutamyl Aminopeptidase	Protein Coding	45	GC04P110365	2.35461	https://www.genecards.org/cgi-bin/carddisp.pl?gene=ENPEP
REN	Renin	Protein Coding	48	GC01M204154	2.34255	https://www.genecards.org/cgi-bin/carddisp.pl?gene=REN
CCR6	C-C Motif Chemokine Receptor 6	Protein Coding	44	GC06P167111	2.34255	https://www.genecards.org/cgi-bin/carddisp.pl?gene=CCR6
F11	Coagulation Factor XI	Protein Coding	46	GC04P186265	2.33106	https://www.genecards.org/cgi-bin/carddisp.pl?gene=F11
HAVCR2	Hepatitis A Virus Cellular Receptor 2	Protein Coding	44	GC05M157063	2.32834	https://www.genecards.org/cgi-bin/carddisp.pl?gene=HAVCR2
BECN1	Beclin 1	Protein Coding	44	GC17M042810	2.30588	https://www.genecards.org/cgi-bin/carddisp.pl?gene=BECN1
AGER	Advanced Glycosylation End-Product Specific Receptor	Protein Coding	44	GC06M032180	2.28227	https://www.genecards.org/cgi-bin/carddisp.pl?gene=AGER
TNNT2	Troponin T2, Cardiac Type	Protein Coding	48	GC01M201359	2.27556	https://www.genecards.org/cgi-bin/carddisp.pl?gene=TNNT2
SNAP29	Synaptosome Associated Protein 29	Protein Coding	41	GC22P020859	2.27556	https://www.genecards.org/cgi-bin/carddisp.pl?gene=SNAP29
GSTT1	Glutathione S-Transferase Theta 1	Protein Coding	33	GC22Mi00270	2.27556	https://www.genecards.org/cgi-bin/carddisp.pl?gene=GSTT1
STX17	Syntaxin 17	Protein Coding	33	GC09P099906	2.27556	https://www.genecards.org/cgi-bin/carddisp.pl?gene=STX17
SAA1	Serum Amyloid A1	Protein Coding	41	GC11P018449	2.23073	https://www.genecards.org/cgi-bin/carddisp.pl?gene=SAA1
TAS2R38	Taste 2 Receptor Member 38	Protein Coding	37	GC07M141972	2.20218	https://www.genecards.org/cgi-bin/carddisp.pl?gene=TAS2R38
SIGMAR1	Sigma Non-Opioid Intracellular Receptor 1	Protein Coding	46	GC09M034634	2.19724	https://www.genecards.org/cgi-bin/carddisp.pl?gene=SIGMAR1
AKAP8L	A-Kinase Anchoring Protein 8 Like	Protein Coding	35	GC19M015380	2.19147	https://www.genecards.org/cgi-bin/carddisp.pl?gene=AKAP8L
NEU1	Neuraminidase 1	Protein Coding	44	GC06M031857	2.1868	https://www.genecards.org/cgi-bin/carddisp.pl?gene=NEU1
RAB8A	RAB8A, Member RAS Oncogene Family	Protein Coding	38	GC19P016111	2.16046	https://www.genecards.org/cgi-bin/carddisp.pl?gene=RAB8A
VPS11	VPS11 Core Subunit Of CORVET And HOPS Complexes	Protein Coding	41	GC11P119067	2.1478	https://www.genecards.org/cgi-bin/carddisp.pl?gene=VPS11
ESM1	Endothelial Cell Specific Molecule 1	Protein Coding	40	GC05M054977	2.13678	https://www.genecards.org/cgi-bin/carddisp.pl?gene=ESM1
MMP1	Matrix Metallopeptidase 1	Protein Coding	51	GC11M102810	2.12121	https://www.genecards.org/cgi-bin/carddisp.pl?gene=MMP1
UNC93B1	Unc-93 Homolog B1, TLR Signaling Regulator	Protein Coding	39	GC11M067991	2.0906	https://www.genecards.org/cgi-bin/carddisp.pl?gene=UNC93B1
LDHA	Lactate Dehydrogenase A	Protein Coding	50	GC11P018394	2.07029	https://www.genecards.org/cgi-bin/carddisp.pl?gene=LDHA
GDF15	Growth Differentiation Factor 15	Protein Coding	42	GC19P050952	2.07029	https://www.genecards.org/cgi-bin/carddisp.pl?gene=GDF15
MIR146A	MicroRNA 146a	RNA Gene	23	GC05P160485	2.05156	https://www.genecards.org/cgi-bin/carddisp.pl?gene=MIR146A
AP3B1	Adaptor Related Protein Complex 3 Subunit Beta 1	Protein Coding	44	GC05M078000	2.04971	https://www.genecards.org/cgi-bin/carddisp.pl?gene=AP3B1
DNMT1	DNA Methyltransferase 1	Protein Coding	50	GC19M010133	2.04386	https://www.genecards.org/cgi-bin/carddisp.pl?gene=DNMT1
HLA-DRB1	Major Histocompatibility Complex, Class II, DR Beta 1	Protein Coding	46	GC06M032578	2.03502	https://www.genecards.org/cgi-bin/carddisp.pl?gene=HLA-DRB1
APLP2	Amyloid Beta Precursor Like Protein 2	Protein Coding	42	GC11P130069	2.03494	https://www.genecards.org/cgi-bin/carddisp.pl?gene=APLP2
NME7	NME/NM23 Family Member 7	Protein Coding	41	GC01M169134	2.03494	https://www.genecards.org/cgi-bin/carddisp.pl?gene=NME7
RAB8B	RAB8B, Member RAS Oncogene Family	Protein Coding	40	GC15P114559	2.03494	https://www.genecards.org/cgi-bin/carddisp.pl?gene=RAB8B
CALML3	Calmodulin Like 3	Protein Coding	40	GC10P005556	2.03494	https://www.genecards.org/cgi-bin/carddisp.pl?gene=CALML3
RAB4B	RAB4B, Member RAS Oncogene Family	Protein Coding	38	GC19P051779	2.03494	https://www.genecards.org/cgi-bin/carddisp.pl?gene=RAB4B
NME5	NME/NM23 Family Member 5	Protein Coding	37	GC05M138115	2.03494	https://www.genecards.org/cgi-bin/carddisp.pl?gene=NME5
CMPK2	Cytidine/Uridine Monophosphate Kinase 2	Protein Coding	37	GC02M006834	2.03494	https://www.genecards.org/cgi-bin/carddisp.pl?gene=CMPK2
TTYH1	Tweety Family Member 1	Protein Coding	37	GC19P062530	2.03494	https://www.genecards.org/cgi-bin/carddisp.pl?gene=TTYH1
ZNF366	Zinc Finger Protein 366	Protein Coding	35	GC05M072907	2.03494	https://www.genecards.org/cgi-bin/carddisp.pl?gene=ZNF366
PYDC1	Pyrin Domain Containing 1	Protein Coding	32	GC16M035915	2.03494	https://www.genecards.org/cgi-bin/carddisp.pl?gene=PYDC1
BTBD17	BTB Domain Containing 17	Protein Coding	30	GC17M074356	2.03494	https://www.genecards.org/cgi-bin/carddisp.pl?gene=BTBD17
VKORC1	Vitamin K Epoxide Reductase Complex Subunit 1	Protein Coding	46	GC16M035909	2.02825	https://www.genecards.org/cgi-bin/carddisp.pl?gene=VKORC1
STING1	Stimulator Of Interferon Response CGAMP Interactor 1	Protein Coding	33	GC05M139476	2.02825	https://www.genecards.org/cgi-bin/carddisp.pl?gene=STING1
NCAM1	Neural Cell Adhesion Molecule 1	Protein Coding	46	GC11P112961	2.02603	https://www.genecards.org/cgi-bin/carddisp.pl?gene=NCAM1
CXCL16	C-X-C Motif Chemokine Ligand 16	Protein Coding	39	GC17M004733	2.02603	https://www.genecards.org/cgi-bin/carddisp.pl?gene=CXCL16
LOC111832671	Albumin (ALB) 5' Regulatory Region	Biological Region	2	GC04P073399	2.02603	https://www.genecards.org/cgi-bin/carddisp.pl?gene=LOC111832671
TH2-LCR	Th2 Cytokine Locus Control Region	Biological Region	2	GC05P132629	2.02603	https://www.genecards.org/cgi-bin/carddisp.pl?gene=TH2-LCR
LOC117152611	DPP4 -4.2 Kb Glucocorticoid Response Element	Biological Region	2	GC02P162078	2.02603	https://www.genecards.org/cgi-bin/carddisp.pl?gene=LOC117152611
LOC117152610	DPP4 Promoter Region	Biological Region	2	GC02P162076	2.02603	https://www.genecards.org/cgi-bin/carddisp.pl?gene=LOC117152610
LOC106699567	CD8A Intronic Regulatory Region	Biological Region	2	GC02P086786	2.02603	https://www.genecards.org/cgi-bin/carddisp.pl?gene=LOC106699567
LOC116158494	CRISPRi-Validated Cis-Regulatory Element Chr4.1813	Biological Region	1	GC04P074056	2.02603	https://www.genecards.org/cgi-bin/carddisp.pl?gene=LOC116158494
LOC116158495	CRISPRi-Validated Cis-Regulatory Element Chr4.1814	Biological Region	1	GC04P074057	2.02603	https://www.genecards.org/cgi-bin/carddisp.pl?gene=LOC116158495
LOC117204000	ANPEP Distal Promoter	Biological Region	1	GC15P089814	2.02603	https://www.genecards.org/cgi-bin/carddisp.pl?gene=LOC117204000
LOC117204001	ANPEP Proximal Promoter	Biological Region	1	GC15P089806	2.02603	https://www.genecards.org/cgi-bin/carddisp.pl?gene=LOC117204001
LOC119230225	IFNAR1 Promoter Region	Biological Region	1	GC21P033323	2.02603	https://www.genecards.org/cgi-bin/carddisp.pl?gene=LOC119230225
LOC112590816	Sharpr-MPRA Regulatory Region 6411	Biological Region	1	GC01P064917	2.02603	https://www.genecards.org/cgi-bin/carddisp.pl?gene=LOC112590816
LOC112590817	Sharpr-MPRA Regulatory Region 2453	Biological Region	1	GC01P064934	2.02603	https://www.genecards.org/cgi-bin/carddisp.pl?gene=LOC112590817
LOC119266102	IFNGR2 Promoter Region	Biological Region	1	GC21P033403	2.02603	https://www.genecards.org/cgi-bin/carddisp.pl?gene=LOC119266102
LOC116183086	CRISPRi-Validated Cis-Regulatory Element Chr7.1154	Biological Region	1	GC07P022680	2.02603	https://www.genecards.org/cgi-bin/carddisp.pl?gene=LOC116183086
LOC116183087	CRISPRi-Validated Cis-Regulatory Element Chr7.1155	Biological Region	1	GC07P022681	2.02603	https://www.genecards.org/cgi-bin/carddisp.pl?gene=LOC116183087
LOC117693187	CTSL 3' Regulatory Element	Biological Region	1	GC09P087731	2.02603	https://www.genecards.org/cgi-bin/carddisp.pl?gene=LOC117693187
ICAM1	Intercellular Adhesion Molecule 1	Protein Coding	49	GC19P010310	2.01024	https://www.genecards.org/cgi-bin/carddisp.pl?gene=ICAM1
SURF1	SURF1 Cytochrome C Oxidase Assembly Factor	Protein Coding	42	GC09M133351	2.01024	https://www.genecards.org/cgi-bin/carddisp.pl?gene=SURF1
IFI44	Interferon Induced Protein 44	Protein Coding	37	GC01P078649	2.01024	https://www.genecards.org/cgi-bin/carddisp.pl?gene=IFI44
AHR	Aryl Hydrocarbon Receptor	Protein Coding	48	GC07P016916	1.99014	https://www.genecards.org/cgi-bin/carddisp.pl?gene=AHR
SLC6A15	Solute Carrier Family 6 Member 15	Protein Coding	41	GC12M084859	1.97846	https://www.genecards.org/cgi-bin/carddisp.pl?gene=SLC6A15
NEDD1	NEDD1 Gamma-Tubulin Ring Complex Targeting Factor	Protein Coding	37	GC12P096907	1.97846	https://www.genecards.org/cgi-bin/carddisp.pl?gene=NEDD1
CST3	Cystatin C	Protein Coding	44	GC20M023646	1.96585	https://www.genecards.org/cgi-bin/carddisp.pl?gene=CST3
IRF5	Interferon Regulatory Factor 5	Protein Coding	46	GC07P128937	1.94511	https://www.genecards.org/cgi-bin/carddisp.pl?gene=IRF5
BRD4	Bromodomain Containing 4	Protein Coding	46	GC19M015236	1.90837	https://www.genecards.org/cgi-bin/carddisp.pl?gene=BRD4
AKAP8	A-Kinase Anchoring Protein 8	Protein Coding	41	GC19M015354	1.90837	https://www.genecards.org/cgi-bin/carddisp.pl?gene=AKAP8
RPL36	Ribosomal Protein L36	Protein Coding	39	GC19P005674	1.90837	https://www.genecards.org/cgi-bin/carddisp.pl?gene=RPL36
FBXL12	F-Box And Leucine Rich Repeat Protein 12	Protein Coding	35	GC19M009810	1.90837	https://www.genecards.org/cgi-bin/carddisp.pl?gene=FBXL12
TIMM29	Translocase Of Inner Mitochondrial Membrane 29	Protein Coding	25	GC19P010929	1.90837	https://www.genecards.org/cgi-bin/carddisp.pl?gene=TIMM29
WWP2	WW Domain Containing E3 Ubiquitin Protein Ligase 2	Protein Coding	43	GC16P069796	1.90209	https://www.genecards.org/cgi-bin/carddisp.pl?gene=WWP2
LGALS3	Galectin 3	Protein Coding	44	GC14P055124	1.90136	https://www.genecards.org/cgi-bin/carddisp.pl?gene=LGALS3
OAS2	2'-5'-Oligoadenylate Synthetase 2	Protein Coding	39	GC12P112978	1.88714	https://www.genecards.org/cgi-bin/carddisp.pl?gene=OAS2
TEK	TEK Receptor Tyrosine Kinase	Protein Coding	50	GC09P027109	1.87796	https://www.genecards.org/cgi-bin/carddisp.pl?gene=TEK
KLF2	Kruppel Like Factor 2	Protein Coding	40	GC19P050893	1.87775	https://www.genecards.org/cgi-bin/carddisp.pl?gene=KLF2
SDCBP	Syndecan Binding Protein	Protein Coding	40	GC08P058539	1.87775	https://www.genecards.org/cgi-bin/carddisp.pl?gene=SDCBP
EIF2B1	Eukaryotic Translation Initiation Factor 2B Subunit Alpha	Protein Coding	43	GC12M123620	1.85845	https://www.genecards.org/cgi-bin/carddisp.pl?gene=EIF2B1
AXL	AXL Receptor Tyrosine Kinase	Protein Coding	50	GC19P041219	1.85279	https://www.genecards.org/cgi-bin/carddisp.pl?gene=AXL
SIRT3	Sirtuin 3	Protein Coding	46	GC11M000215	1.85279	https://www.genecards.org/cgi-bin/carddisp.pl?gene=SIRT3
STX7	Syntaxin 7	Protein Coding	39	GC06M132445	1.8367	https://www.genecards.org/cgi-bin/carddisp.pl?gene=STX7
STX6	Syntaxin 6	Protein Coding	38	GC01M180972	1.8367	https://www.genecards.org/cgi-bin/carddisp.pl?gene=STX6
VPS16	VPS16 Core Subunit Of CORVET And HOPS Complexes	Protein Coding	36	GC20P002840	1.8367	https://www.genecards.org/cgi-bin/carddisp.pl?gene=VPS16
VPS18	VPS18 Core Subunit Of CORVET And HOPS Complexes	Protein Coding	35	GC15P040894	1.8367	https://www.genecards.org/cgi-bin/carddisp.pl?gene=VPS18
HSD17B4	Hydroxysteroid 17-Beta Dehydrogenase 4	Protein Coding	45	GC05P119452	1.83504	https://www.genecards.org/cgi-bin/carddisp.pl?gene=HSD17B4
TPM4	Tropomyosin 4	Protein Coding	40	GC19P050886	1.83504	https://www.genecards.org/cgi-bin/carddisp.pl?gene=TPM4
DOCK6	Dedicator Of Cytokinesis 6	Protein Coding	40	GC19M011199	1.83504	https://www.genecards.org/cgi-bin/carddisp.pl?gene=DOCK6
KDELR1	KDEL Endoplasmic Reticulum Protein Retention Receptor 1	Protein Coding	39	GC19M048382	1.83504	https://www.genecards.org/cgi-bin/carddisp.pl?gene=KDELR1
LRRFIP2	LRR Binding FLII Interacting Protein 2	Protein Coding	38	GC03M037052	1.83504	https://www.genecards.org/cgi-bin/carddisp.pl?gene=LRRFIP2
EIF3G	Eukaryotic Translation Initiation Factor 3 Subunit G	Protein Coding	37	GC19M010115	1.83504	https://www.genecards.org/cgi-bin/carddisp.pl?gene=EIF3G
SURF6	Surfeit 6	Protein Coding	34	GC09M133331	1.83504	https://www.genecards.org/cgi-bin/carddisp.pl?gene=SURF6
MON2	MON2 Homolog, Regulator Of Endosome-To-Golgi Trafficking	Protein Coding	33	GC12P062466	1.83504	https://www.genecards.org/cgi-bin/carddisp.pl?gene=MON2
TTC27	Tetratricopeptide Repeat Domain 27	Protein Coding	32	GC02P032628	1.83504	https://www.genecards.org/cgi-bin/carddisp.pl?gene=TTC27
LMNB1	Lamin B1	Protein Coding	46	GC05P126776	1.83187	https://www.genecards.org/cgi-bin/carddisp.pl?gene=LMNB1
CNBP	CCHC-Type Zinc Finger Nucleic Acid Binding Protein	Protein Coding	41	GC03M129167	1.83187	https://www.genecards.org/cgi-bin/carddisp.pl?gene=CNBP
GZMA	Granzyme A	Protein Coding	42	GC05P055102	1.82621	https://www.genecards.org/cgi-bin/carddisp.pl?gene=GZMA
TMPRSS4	Transmembrane Serine Protease 4	Protein Coding	39	GC11P118077	1.82621	https://www.genecards.org/cgi-bin/carddisp.pl?gene=TMPRSS4
ISG15	ISG15 Ubiquitin Like Modifier	Protein Coding	45	GC01P001001	1.81737	https://www.genecards.org/cgi-bin/carddisp.pl?gene=ISG15
HLA-G	Major Histocompatibility Complex, Class I, G	Protein Coding	44	GC06P076812	1.79766	https://www.genecards.org/cgi-bin/carddisp.pl?gene=HLA-G
IFNL4	Interferon Lambda 4 (Gene/Pseudogene)	Protein Coding	19	GC19M039246	1.79766	https://www.genecards.org/cgi-bin/carddisp.pl?gene=IFNL4
PDHX	Pyruvate Dehydrogenase Complex Component X	Protein Coding	46	GC11P034894	1.7888	https://www.genecards.org/cgi-bin/carddisp.pl?gene=PDHX
HMGCR	3-Hydroxy-3-Methylglutaryl-CoA Reductase	Protein Coding	45	GC05P075336	1.7888	https://www.genecards.org/cgi-bin/carddisp.pl?gene=HMGCR
CYB5A	Cytochrome B5 Type A	Protein Coding	43	GC18M074250	1.7888	https://www.genecards.org/cgi-bin/carddisp.pl?gene=CYB5A
FAT1	FAT Atypical Cadherin 1	Protein Coding	40	GC04M186587	1.7888	https://www.genecards.org/cgi-bin/carddisp.pl?gene=FAT1
PEG10	Paternally Expressed 10	Protein Coding	40	GC07P094656	1.7888	https://www.genecards.org/cgi-bin/carddisp.pl?gene=PEG10
PDS5A	PDS5 Cohesin Associated Factor A	Protein Coding	38	GC04M039824	1.7888	https://www.genecards.org/cgi-bin/carddisp.pl?gene=PDS5A
MLEC	Malectin	Protein Coding	36	GC12P120687	1.7888	https://www.genecards.org/cgi-bin/carddisp.pl?gene=MLEC
PALM	Paralemmin	Protein Coding	35	GC19P000708	1.7888	https://www.genecards.org/cgi-bin/carddisp.pl?gene=PALM
PLA2G7	Phospholipase A2 Group VII	Protein Coding	49	GC06M061586	1.78771	https://www.genecards.org/cgi-bin/carddisp.pl?gene=PLA2G7
AKT1	AKT Serine/Threonine Kinase 1	Protein Coding	52	GC14M104769	1.76661	https://www.genecards.org/cgi-bin/carddisp.pl?gene=AKT1
PLG	Plasminogen	Protein Coding	48	GC06P160702	1.76661	https://www.genecards.org/cgi-bin/carddisp.pl?gene=PLG
VEGFA	Vascular Endothelial Growth Factor A	Protein Coding	47	GC06P043770	1.76661	https://www.genecards.org/cgi-bin/carddisp.pl?gene=VEGFA
TRPV1	Transient Receptor Potential Cation Channel Subfamily V Member 1	Protein Coding	46	GC17M003565	1.76661	https://www.genecards.org/cgi-bin/carddisp.pl?gene=TRPV1
TRPA1	Transient Receptor Potential Cation Channel Subfamily A Member 1	Protein Coding	46	GC08M072019	1.76661	https://www.genecards.org/cgi-bin/carddisp.pl?gene=TRPA1
PAFAH1B1	Platelet Activating Factor Acetylhydrolase 1b Regulatory Subunit 1	Protein Coding	45	GC17P002593	1.76661	https://www.genecards.org/cgi-bin/carddisp.pl?gene=PAFAH1B1
GSTM1	Glutathione S-Transferase Mu 1	Protein Coding	41	GC01P109687	1.76661	https://www.genecards.org/cgi-bin/carddisp.pl?gene=GSTM1
C9orf72	C9orf72-SMCR8 Complex Subunit	Protein Coding	41	GC09M028148	1.76661	https://www.genecards.org/cgi-bin/carddisp.pl?gene=C9orf72
WWP1	WW Domain Containing E3 Ubiquitin Protein Ligase 1	Protein Coding	41	GC08P086342	1.76661	https://www.genecards.org/cgi-bin/carddisp.pl?gene=WWP1
RBM15	RNA Binding Motif Protein 15	Protein Coding	38	GC01P110338	1.76661	https://www.genecards.org/cgi-bin/carddisp.pl?gene=RBM15
IFNL2	Interferon Lambda 2	Protein Coding	35	GC19P039268	1.76661	https://www.genecards.org/cgi-bin/carddisp.pl?gene=IFNL2
PLA2G2A	Phospholipase A2 Group IIA	Protein Coding	46	GC01M019975	1.76526	https://www.genecards.org/cgi-bin/carddisp.pl?gene=PLA2G2A
CHRFAM7A	CHRNA7 (Exons 5-10) And FAM7A (Exons A-E) Fusion	Protein Coding	33	GC15M030360	1.74165	https://www.genecards.org/cgi-bin/carddisp.pl?gene=CHRFAM7A
MIR139	MicroRNA 139	RNA Gene	21	GC11M072615	1.74165	https://www.genecards.org/cgi-bin/carddisp.pl?gene=MIR139
MIR30A	MicroRNA 30a	RNA Gene	21	GC06M071403	1.74165	https://www.genecards.org/cgi-bin/carddisp.pl?gene=MIR30A
SNHG16	Small Nucleolar RNA Host Gene 16	RNA Gene	20	GC17P076982	1.74165	https://www.genecards.org/cgi-bin/carddisp.pl?gene=SNHG16
SNHG6	Small Nucleolar RNA Host Gene 6	RNA Gene	18	GC08M066921	1.74165	https://www.genecards.org/cgi-bin/carddisp.pl?gene=SNHG6
MAS1	MAS1 Proto-Oncogene, G Protein-Coupled Receptor	Protein Coding	38	GC06P160324	1.73226	https://www.genecards.org/cgi-bin/carddisp.pl?gene=MAS1
PTBP1	Polypyrimidine Tract Binding Protein 1	Protein Coding	42	GC19P000797	1.72854	https://www.genecards.org/cgi-bin/carddisp.pl?gene=PTBP1
ILF3	Interleukin Enhancer Binding Factor 3	Protein Coding	39	GC19P010655	1.72854	https://www.genecards.org/cgi-bin/carddisp.pl?gene=ILF3
TICAM1	Toll Like Receptor Adaptor Molecule 1	Protein Coding	43	GC19M004815	1.71845	https://www.genecards.org/cgi-bin/carddisp.pl?gene=TICAM1
SMN1	Survival Of Motor Neuron 1, Telomeric	Protein Coding	41	GC05P070924	1.71669	https://www.genecards.org/cgi-bin/carddisp.pl?gene=SMN1
S100A12	S100 Calcium Binding Protein A12	Protein Coding	39	GC01M153373	1.71669	https://www.genecards.org/cgi-bin/carddisp.pl?gene=S100A12
MADCAM1	Mucosal Vascular Addressin Cell Adhesion Molecule 1	Protein Coding	40	GC19P002079	1.69894	https://www.genecards.org/cgi-bin/carddisp.pl?gene=MADCAM1
ITGAV	Integrin Subunit Alpha V	Protein Coding	46	GC02P186589	1.69328	https://www.genecards.org/cgi-bin/carddisp.pl?gene=ITGAV
C5	Complement C5	Protein Coding	46	GC09M120952	1.69328	https://www.genecards.org/cgi-bin/carddisp.pl?gene=C5
GC	GC Vitamin D Binding Protein	Protein Coding	45	GC04M071741	1.69328	https://www.genecards.org/cgi-bin/carddisp.pl?gene=GC
C5AR1	Complement C5a Receptor 1	Protein Coding	44	GC19P047290	1.69328	https://www.genecards.org/cgi-bin/carddisp.pl?gene=C5AR1
RB1CC1	RB1 Inducible Coiled-Coil 1	Protein Coding	41	GC08M052622	1.69328	https://www.genecards.org/cgi-bin/carddisp.pl?gene=RB1CC1
VPS33A	VPS33A Core Subunit Of CORVET And HOPS Complexes	Protein Coding	40	GC12M122229	1.69328	https://www.genecards.org/cgi-bin/carddisp.pl?gene=VPS33A
FCGR1A	Fc Gamma Receptor Ia	Protein Coding	41	GC01P149788	1.69121	https://www.genecards.org/cgi-bin/carddisp.pl?gene=FCGR1A
FTL	Ferritin Light Chain	Protein Coding	46	GC19P048965	1.69011	https://www.genecards.org/cgi-bin/carddisp.pl?gene=FTL
MAF	MAF BZIP Transcription Factor	Protein Coding	45	GC16M079204	1.69011	https://www.genecards.org/cgi-bin/carddisp.pl?gene=MAF
MAFB	MAF BZIP Transcription Factor B	Protein Coding	44	GC20M040685	1.69011	https://www.genecards.org/cgi-bin/carddisp.pl?gene=MAFB
UNC13D	Unc-13 Homolog D	Protein Coding	44	GC17M075827	1.69011	https://www.genecards.org/cgi-bin/carddisp.pl?gene=UNC13D
TREM2	Triggering Receptor Expressed On Myeloid Cells 2	Protein Coding	43	GC06M061491	1.69011	https://www.genecards.org/cgi-bin/carddisp.pl?gene=TREM2
FABP2	Fatty Acid Binding Protein 2	Protein Coding	41	GC04M119317	1.69011	https://www.genecards.org/cgi-bin/carddisp.pl?gene=FABP2
THBS3	Thrombospondin 3	Protein Coding	41	GC01M155195	1.69011	https://www.genecards.org/cgi-bin/carddisp.pl?gene=THBS3
LAG3	Lymphocyte Activating 3	Protein Coding	38	GC12P018557	1.69011	https://www.genecards.org/cgi-bin/carddisp.pl?gene=LAG3
MIR126	MicroRNA 126	RNA Gene	23	GC09P136670	1.69011	https://www.genecards.org/cgi-bin/carddisp.pl?gene=MIR126
MIR29A	MicroRNA 29a	RNA Gene	22	GC07M130876	1.69011	https://www.genecards.org/cgi-bin/carddisp.pl?gene=MIR29A
MIR10B	MicroRNA 10b	RNA Gene	22	GC02P176150	1.69011	https://www.genecards.org/cgi-bin/carddisp.pl?gene=MIR10B
MIR31	MicroRNA 31	RNA Gene	21	GC09M021705	1.69011	https://www.genecards.org/cgi-bin/carddisp.pl?gene=MIR31
CD274	CD274 Molecule	Protein Coding	43	GC09P005450	1.68189	https://www.genecards.org/cgi-bin/carddisp.pl?gene=CD274
NOS3	Nitric Oxide Synthase 3	Protein Coding	50	GC07P150990	1.66155	https://www.genecards.org/cgi-bin/carddisp.pl?gene=NOS3
IL2RB	Interleukin 2 Receptor Subunit Beta	Protein Coding	48	GC22M037125	1.66155	https://www.genecards.org/cgi-bin/carddisp.pl?gene=IL2RB
CNR2	Cannabinoid Receptor 2	Protein Coding	45	GC01M023870	1.66155	https://www.genecards.org/cgi-bin/carddisp.pl?gene=CNR2
ENPP2	Ectonucleotide Pyrophosphatase/Phosphodiesterase 2	Protein Coding	44	GC08M119556	1.66155	https://www.genecards.org/cgi-bin/carddisp.pl?gene=ENPP2
P2RY14	Purinergic Receptor P2Y14	Protein Coding	42	GC03M151212	1.66155	https://www.genecards.org/cgi-bin/carddisp.pl?gene=P2RY14
SREBF2	Sterol Regulatory Element Binding Transcription Factor 2	Protein Coding	42	GC22P041833	1.66155	https://www.genecards.org/cgi-bin/carddisp.pl?gene=SREBF2
IL37	Interleukin 37	Protein Coding	37	GC02P120918	1.66155	https://www.genecards.org/cgi-bin/carddisp.pl?gene=IL37
RIOX2	Ribosomal Oxygenase 2	Protein Coding	30	GC03M097942	1.66155	https://www.genecards.org/cgi-bin/carddisp.pl?gene=RIOX2
MDM2	MDM2 Proto-Oncogene	Protein Coding	52	GC12P068808	1.6527	https://www.genecards.org/cgi-bin/carddisp.pl?gene=MDM2
GPHN	Gephyrin	Protein Coding	47	GC14P066507	1.6527	https://www.genecards.org/cgi-bin/carddisp.pl?gene=GPHN
MYO1E	Myosin IE	Protein Coding	44	GC15M059132	1.6527	https://www.genecards.org/cgi-bin/carddisp.pl?gene=MYO1E
TCF3	Transcription Factor 3	Protein Coding	44	GC19M001609	1.6527	https://www.genecards.org/cgi-bin/carddisp.pl?gene=TCF3
ACAD9	Acyl-CoA Dehydrogenase Family Member 9	Protein Coding	43	GC03P133367	1.6527	https://www.genecards.org/cgi-bin/carddisp.pl?gene=ACAD9
CCHCR1	Coiled-Coil Alpha-Helical Rod Protein 1	Protein Coding	38	GC06M061251	1.6527	https://www.genecards.org/cgi-bin/carddisp.pl?gene=CCHCR1
DHX37	DEAH-Box Helicase 37	Protein Coding	38	GC12M124946	1.6527	https://www.genecards.org/cgi-bin/carddisp.pl?gene=DHX37
COPG1	COPI Coat Complex Subunit Gamma 1	Protein Coding	37	GC03P129249	1.6527	https://www.genecards.org/cgi-bin/carddisp.pl?gene=COPG1
QTRT1	Queuine TRNA-Ribosyltransferase Catalytic Subunit 1	Protein Coding	37	GC19P010701	1.6527	https://www.genecards.org/cgi-bin/carddisp.pl?gene=QTRT1
SLC35F1	Solute Carrier Family 35 Member F1	Protein Coding	34	GC06P117907	1.6527	https://www.genecards.org/cgi-bin/carddisp.pl?gene=SLC35F1
PSME3	Proteasome Activator Subunit 3	Protein Coding	41	GC17P042824	1.64704	https://www.genecards.org/cgi-bin/carddisp.pl?gene=PSME3
FNDC5	Fibronectin Type III Domain Containing 5	Protein Coding	34	GC01M033105	1.64704	https://www.genecards.org/cgi-bin/carddisp.pl?gene=FNDC5
PALS1	Protein Associated With LIN7 1, MAGUK P55 Family Member	Protein Coding	32	GC14P067240	1.64704	https://www.genecards.org/cgi-bin/carddisp.pl?gene=PALS1
MMP3	Matrix Metallopeptidase 3	Protein Coding	49	GC11M102835	1.6305	https://www.genecards.org/cgi-bin/carddisp.pl?gene=MMP3
LCN2	Lipocalin 2	Protein Coding	43	GC09P128149	1.6305	https://www.genecards.org/cgi-bin/carddisp.pl?gene=LCN2
ELAVL2	ELAV Like RNA Binding Protein 2	Protein Coding	41	GC09M023690	1.6305	https://www.genecards.org/cgi-bin/carddisp.pl?gene=ELAVL2
PTGDR2	Prostaglandin D2 Receptor 2	Protein Coding	41	GC11M060850	1.6305	https://www.genecards.org/cgi-bin/carddisp.pl?gene=PTGDR2
TNFSF14	TNF Superfamily Member 14	Protein Coding	41	GC19M006663	1.6305	https://www.genecards.org/cgi-bin/carddisp.pl?gene=TNFSF14
DEFA1	Defensin Alpha 1	Protein Coding	41	GC08M006977	1.6305	https://www.genecards.org/cgi-bin/carddisp.pl?gene=DEFA1
UBE2L6	Ubiquitin Conjugating Enzyme E2 L6	Protein Coding	38	GC11M084396	1.6305	https://www.genecards.org/cgi-bin/carddisp.pl?gene=UBE2L6
KLRC2	Killer Cell Lectin Like Receptor C2	Protein Coding	36	GC12M019792	1.6305	https://www.genecards.org/cgi-bin/carddisp.pl?gene=KLRC2
MIR152	MicroRNA 152	RNA Gene	22	GC17M048037	1.61653	https://www.genecards.org/cgi-bin/carddisp.pl?gene=MIR152
ITK	IL2 Inducible T Cell Kinase	Protein Coding	51	GC05P157158	1.59616	https://www.genecards.org/cgi-bin/carddisp.pl?gene=ITK
BTK	Bruton Tyrosine Kinase	Protein Coding	51	GC0XM101349	1.59616	https://www.genecards.org/cgi-bin/carddisp.pl?gene=BTK
CAT	Catalase	Protein Coding	49	GC11P034460	1.59616	https://www.genecards.org/cgi-bin/carddisp.pl?gene=CAT
BCL2	BCL2 Apoptosis Regulator	Protein Coding	49	GC18M063123	1.59616	https://www.genecards.org/cgi-bin/carddisp.pl?gene=BCL2
F10	Coagulation Factor X	Protein Coding	49	GC13P113122	1.59616	https://www.genecards.org/cgi-bin/carddisp.pl?gene=F10
SLC6A4	Solute Carrier Family 6 Member 4	Protein Coding	48	GC17M030194	1.59616	https://www.genecards.org/cgi-bin/carddisp.pl?gene=SLC6A4
PIK3C3	Phosphatidylinositol 3-Kinase Catalytic Subunit Type 3	Protein Coding	48	GC18P041955	1.59616	https://www.genecards.org/cgi-bin/carddisp.pl?gene=PIK3C3
MIF	Macrophage Migration Inhibitory Factor	Protein Coding	47	GC22P023894	1.59616	https://www.genecards.org/cgi-bin/carddisp.pl?gene=MIF
LEP	Leptin	Protein Coding	46	GC07P128241	1.59616	https://www.genecards.org/cgi-bin/carddisp.pl?gene=LEP
NEDD4	NEDD4 E3 Ubiquitin Protein Ligase	Protein Coding	46	GC15M055826	1.59616	https://www.genecards.org/cgi-bin/carddisp.pl?gene=NEDD4
SMURF1	SMAD Specific E3 Ubiquitin Protein Ligase 1	Protein Coding	44	GC07M099027	1.59616	https://www.genecards.org/cgi-bin/carddisp.pl?gene=SMURF1
ULK1	Unc-51 Like Autophagy Activating Kinase 1	Protein Coding	44	GC12P131894	1.59616	https://www.genecards.org/cgi-bin/carddisp.pl?gene=ULK1
OLR1	Oxidized Low Density Lipoprotein Receptor 1	Protein Coding	42	GC12M019787	1.59616	https://www.genecards.org/cgi-bin/carddisp.pl?gene=OLR1
PER3	Period Circadian Regulator 3	Protein Coding	42	GC01P007785	1.59616	https://www.genecards.org/cgi-bin/carddisp.pl?gene=PER3
SELL	Selectin L	Protein Coding	42	GC01M169690	1.59616	https://www.genecards.org/cgi-bin/carddisp.pl?gene=SELL
TIRAP	TIR Domain Containing Adaptor Protein	Protein Coding	42	GC11P126284	1.59616	https://www.genecards.org/cgi-bin/carddisp.pl?gene=TIRAP
SMURF2	SMAD Specific E3 Ubiquitin Protein Ligase 2	Protein Coding	42	GC17M064542	1.59616	https://www.genecards.org/cgi-bin/carddisp.pl?gene=SMURF2
ATG13	Autophagy Related 13	Protein Coding	37	GC11P046644	1.59616	https://www.genecards.org/cgi-bin/carddisp.pl?gene=ATG13
FBXW7-AS1	FBXW7 Antisense RNA 1	RNA Gene	12	GC04P152338	1.59616	https://www.genecards.org/cgi-bin/carddisp.pl?gene=FBXW7-AS1
PLAU	Plasminogen Activator, Urokinase	Protein Coding	50	GC10P073909	1.59243	https://www.genecards.org/cgi-bin/carddisp.pl?gene=PLAU
PIK3R1	Phosphoinositide-3-Kinase Regulatory Subunit 1	Protein Coding	49	GC05P068215	1.59243	https://www.genecards.org/cgi-bin/carddisp.pl?gene=PIK3R1
EPHA7	EPH Receptor A7	Protein Coding	48	GC06M093240	1.59243	https://www.genecards.org/cgi-bin/carddisp.pl?gene=EPHA7
ACACA	Acetyl-CoA Carboxylase Alpha	Protein Coding	48	GC17M037084	1.59243	https://www.genecards.org/cgi-bin/carddisp.pl?gene=ACACA
NRG1	Neuregulin 1	Protein Coding	46	GC08P031639	1.59243	https://www.genecards.org/cgi-bin/carddisp.pl?gene=NRG1
SLC19A1	Solute Carrier Family 19 Member 1	Protein Coding	46	GC21M045493	1.59243	https://www.genecards.org/cgi-bin/carddisp.pl?gene=SLC19A1
VCL	Vinculin	Protein Coding	46	GC10P073995	1.59243	https://www.genecards.org/cgi-bin/carddisp.pl?gene=VCL
PTPRS	Protein Tyrosine Phosphatase Receptor Type S	Protein Coding	45	GC19M005157	1.59243	https://www.genecards.org/cgi-bin/carddisp.pl?gene=PTPRS
OSMR	Oncostatin M Receptor	Protein Coding	45	GC05P038845	1.59243	https://www.genecards.org/cgi-bin/carddisp.pl?gene=OSMR
ATP6V0A2	ATPase H+ Transporting V0 Subunit A2	Protein Coding	44	GC12P123712	1.59243	https://www.genecards.org/cgi-bin/carddisp.pl?gene=ATP6V0A2
LIAS	Lipoic Acid Synthetase	Protein Coding	43	GC04P039487	1.59243	https://www.genecards.org/cgi-bin/carddisp.pl?gene=LIAS
SGCE	Sarcoglycan Epsilon	Protein Coding	43	GC07M094524	1.59243	https://www.genecards.org/cgi-bin/carddisp.pl?gene=SGCE
LMNB2	Lamin B2	Protein Coding	43	GC19M004462	1.59243	https://www.genecards.org/cgi-bin/carddisp.pl?gene=LMNB2
RPL13A	Ribosomal Protein L13a	Protein Coding	42	GC19P049487	1.59243	https://www.genecards.org/cgi-bin/carddisp.pl?gene=RPL13A
CDC37	Cell Division Cycle 37, HSP90 Cochaperone	Protein Coding	41	GC19M010391	1.59243	https://www.genecards.org/cgi-bin/carddisp.pl?gene=CDC37
ATP6V1D	ATPase H+ Transporting V1 Subunit D	Protein Coding	40	GC14M067294	1.59243	https://www.genecards.org/cgi-bin/carddisp.pl?gene=ATP6V1D
POLD3	DNA Polymerase Delta 3, Accessory Subunit	Protein Coding	40	GC11P074526	1.59243	https://www.genecards.org/cgi-bin/carddisp.pl?gene=POLD3
NUCB1	Nucleobindin 1	Protein Coding	40	GC19P048900	1.59243	https://www.genecards.org/cgi-bin/carddisp.pl?gene=NUCB1
PSMD11	Proteasome 26S Subunit, Non-ATPase 11	Protein Coding	40	GC17P032444	1.59243	https://www.genecards.org/cgi-bin/carddisp.pl?gene=PSMD11
SIN3B	SIN3 Transcription Regulator Family Member B	Protein Coding	40	GC19P016829	1.59243	https://www.genecards.org/cgi-bin/carddisp.pl?gene=SIN3B
RNF213	Ring Finger Protein 213	Protein Coding	39	GC17P080260	1.59243	https://www.genecards.org/cgi-bin/carddisp.pl?gene=RNF213
TRA2A	Transformer 2 Alpha Homolog	Protein Coding	39	GC07M023504	1.59243	https://www.genecards.org/cgi-bin/carddisp.pl?gene=TRA2A
ANKLE2	Ankyrin Repeat And LEM Domain Containing 2	Protein Coding	39	GC12M132725	1.59243	https://www.genecards.org/cgi-bin/carddisp.pl?gene=ANKLE2
GCNT3	Glucosaminyl (N-Acetyl) Transferase 3, Mucin Type	Protein Coding	38	GC15P059594	1.59243	https://www.genecards.org/cgi-bin/carddisp.pl?gene=GCNT3
SNRNP70	Small Nuclear Ribonucleoprotein U1 Subunit 70	Protein Coding	38	GC19P049085	1.59243	https://www.genecards.org/cgi-bin/carddisp.pl?gene=SNRNP70
SAFB	Scaffold Attachment Factor B	Protein Coding	38	GC19P005623	1.59243	https://www.genecards.org/cgi-bin/carddisp.pl?gene=SAFB
SACM1L	SAC1 Like Phosphatidylinositide Phosphatase	Protein Coding	38	GC03P046263	1.59243	https://www.genecards.org/cgi-bin/carddisp.pl?gene=SACM1L
TRAPPC9	Trafficking Protein Particle Complex Subunit 9	Protein Coding	38	GC08M139728	1.59243	https://www.genecards.org/cgi-bin/carddisp.pl?gene=TRAPPC9
SYT4	Synaptotagmin 4	Protein Coding	38	GC18M043267	1.59243	https://www.genecards.org/cgi-bin/carddisp.pl?gene=SYT4
DAZAP1	DAZ Associated Protein 1	Protein Coding	38	GC19P001407	1.59243	https://www.genecards.org/cgi-bin/carddisp.pl?gene=DAZAP1
NCAPH2	Non-SMC Condensin II Complex Subunit H2	Protein Coding	37	GC22P050508	1.59243	https://www.genecards.org/cgi-bin/carddisp.pl?gene=NCAPH2
PLXNB2	Plexin B2	Protein Coding	37	GC22M050274	1.59243	https://www.genecards.org/cgi-bin/carddisp.pl?gene=PLXNB2
RMND1	Required For Meiotic Nuclear Division 1 Homolog	Protein Coding	37	GC06M151404	1.59243	https://www.genecards.org/cgi-bin/carddisp.pl?gene=RMND1
SAFB2	Scaffold Attachment Factor B2	Protein Coding	37	GC19M005587	1.59243	https://www.genecards.org/cgi-bin/carddisp.pl?gene=SAFB2
STX18	Syntaxin 18	Protein Coding	36	GC04M004417	1.59243	https://www.genecards.org/cgi-bin/carddisp.pl?gene=STX18
TUT1	Terminal Uridylyl Transferase 1, U6 SnRNA-Specific	Protein Coding	36	GC11M084544	1.59243	https://www.genecards.org/cgi-bin/carddisp.pl?gene=TUT1
TBC1D5	TBC1 Domain Family Member 5	Protein Coding	36	GC03M017157	1.59243	https://www.genecards.org/cgi-bin/carddisp.pl?gene=TBC1D5
PCBP3	Poly(RC) Binding Protein 3	Protein Coding	36	GC21P045643	1.59243	https://www.genecards.org/cgi-bin/carddisp.pl?gene=PCBP3
PIH1D1	PIH1 Domain Containing 1	Protein Coding	36	GC19M062195	1.59243	https://www.genecards.org/cgi-bin/carddisp.pl?gene=PIH1D1
TBC1D8	TBC1 Domain Family Member 8	Protein Coding	35	GC02M101007	1.59243	https://www.genecards.org/cgi-bin/carddisp.pl?gene=TBC1D8
NTPCR	Nucleoside-Triphosphatase, Cancer-Related	Protein Coding	35	GC01P232950	1.59243	https://www.genecards.org/cgi-bin/carddisp.pl?gene=NTPCR
ECHDC3	Enoyl-CoA Hydratase Domain Containing 3	Protein Coding	34	GC10P011742	1.59243	https://www.genecards.org/cgi-bin/carddisp.pl?gene=ECHDC3
RAVER1	Ribonucleoprotein, PTB Binding 1	Protein Coding	34	GC19M010316	1.59243	https://www.genecards.org/cgi-bin/carddisp.pl?gene=RAVER1
WDR18	WD Repeat Domain 18	Protein Coding	34	GC19P002186	1.59243	https://www.genecards.org/cgi-bin/carddisp.pl?gene=WDR18
KRI1	KRI1 Homolog	Protein Coding	33	GC19M010553	1.59243	https://www.genecards.org/cgi-bin/carddisp.pl?gene=KRI1
MYDGF	Myeloid Derived Growth Factor	Protein Coding	33	GC19M004641	1.59243	https://www.genecards.org/cgi-bin/carddisp.pl?gene=MYDGF
PPAN	Peter Pan Homolog	Protein Coding	33	GC19P010296	1.59243	https://www.genecards.org/cgi-bin/carddisp.pl?gene=PPAN
GRWD1	Glutamate Rich WD Repeat Containing 1	Protein Coding	32	GC19P048445	1.59243	https://www.genecards.org/cgi-bin/carddisp.pl?gene=GRWD1
STEAP1B	STEAP Family Member 1B	Protein Coding	26	GC07M022419	1.59243	https://www.genecards.org/cgi-bin/carddisp.pl?gene=STEAP1B
ANXA2	Annexin A2	Protein Coding	47	GC15M060347	1.58677	https://www.genecards.org/cgi-bin/carddisp.pl?gene=ANXA2
SOCS1	Suppressor Of Cytokine Signaling 1	Protein Coding	43	GC16M011783	1.58677	https://www.genecards.org/cgi-bin/carddisp.pl?gene=SOCS1
NPR3	Natriuretic Peptide Receptor 3	Protein Coding	46	GC05P032689	1.5816	https://www.genecards.org/cgi-bin/carddisp.pl?gene=NPR3
PAPPA	Pappalysin 1	Protein Coding	42	GC09P118342	1.5816	https://www.genecards.org/cgi-bin/carddisp.pl?gene=PAPPA
XK	X-Linked Kx Blood Group	Protein Coding	40	GC0XP037685	1.5816	https://www.genecards.org/cgi-bin/carddisp.pl?gene=XK
DELEC1	Deleted In Esophageal Cancer 1	RNA Gene	23	GC09P118334	1.5816	https://www.genecards.org/cgi-bin/carddisp.pl?gene=DELEC1
ANXA5	Annexin A5	Protein Coding	45	GC04M121667	1.56232	https://www.genecards.org/cgi-bin/carddisp.pl?gene=ANXA5
SMPD1	Sphingomyelin Phosphodiesterase 1	Protein Coding	48	GC11P006390	1.55718	https://www.genecards.org/cgi-bin/carddisp.pl?gene=SMPD1
SPP1	Secreted Phosphoprotein 1	Protein Coding	46	GC04P087975	1.55718	https://www.genecards.org/cgi-bin/carddisp.pl?gene=SPP1
P2RX7	Purinergic Receptor P2X 7	Protein Coding	46	GC12P125508	1.55718	https://www.genecards.org/cgi-bin/carddisp.pl?gene=P2RX7
F2RL1	F2R Like Trypsin Receptor 1	Protein Coding	45	GC05P076818	1.55718	https://www.genecards.org/cgi-bin/carddisp.pl?gene=F2RL1
F2RL3	F2R Like Thrombin Or Trypsin Receptor 3	Protein Coding	45	GC19P016888	1.55718	https://www.genecards.org/cgi-bin/carddisp.pl?gene=F2RL3
CHI3L1	Chitinase 3 Like 1	Protein Coding	44	GC01M203148	1.55718	https://www.genecards.org/cgi-bin/carddisp.pl?gene=CHI3L1
THPO	Thrombopoietin	Protein Coding	42	GC03M184371	1.55718	https://www.genecards.org/cgi-bin/carddisp.pl?gene=THPO
BDKRB1	Bradykinin Receptor B1	Protein Coding	42	GC14P096290	1.55718	https://www.genecards.org/cgi-bin/carddisp.pl?gene=BDKRB1
CPA3	Carboxypeptidase A3	Protein Coding	41	GC03P148865	1.55718	https://www.genecards.org/cgi-bin/carddisp.pl?gene=CPA3
LGALS9	Galectin 9	Protein Coding	39	GC17P027629	1.55718	https://www.genecards.org/cgi-bin/carddisp.pl?gene=LGALS9
NEAT1	Nuclear Paraspeckle Assembly Transcript 1	RNA Gene	24	GC11P068984	1.55718	https://www.genecards.org/cgi-bin/carddisp.pl?gene=NEAT1
MALAT1	Metastasis Associated Lung Adenocarcinoma Transcript 1	RNA Gene	24	GC11P068989	1.55718	https://www.genecards.org/cgi-bin/carddisp.pl?gene=MALAT1
CTLA4	Cytotoxic T-Lymphocyte Associated Protein 4	Protein Coding	44	GC02P203867	1.54578	https://www.genecards.org/cgi-bin/carddisp.pl?gene=CTLA4
FPR1	Formyl Peptide Receptor 1	Protein Coding	47	GC19M051745	1.51093	https://www.genecards.org/cgi-bin/carddisp.pl?gene=FPR1
SIRT1	Sirtuin 1	Protein Coding	47	GC10P067884	1.51093	https://www.genecards.org/cgi-bin/carddisp.pl?gene=SIRT1
ATF4	Activating Transcription Factor 4	Protein Coding	45	GC22P039599	1.51093	https://www.genecards.org/cgi-bin/carddisp.pl?gene=ATF4
IDO1	Indoleamine 2,3-Dioxygenase 1	Protein Coding	44	GC08P039891	1.51093	https://www.genecards.org/cgi-bin/carddisp.pl?gene=IDO1
TNFRSF13C	TNF Receptor Superfamily Member 13C	Protein Coding	43	GC22M055099	1.51093	https://www.genecards.org/cgi-bin/carddisp.pl?gene=TNFRSF13C
SOD3	Superoxide Dismutase 3	Protein Coding	42	GC04P024798	1.51093	https://www.genecards.org/cgi-bin/carddisp.pl?gene=SOD3
CXCL3	C-X-C Motif Chemokine Ligand 3	Protein Coding	37	GC04M074036	1.51093	https://www.genecards.org/cgi-bin/carddisp.pl?gene=CXCL3
ATG14	Autophagy Related 14	Protein Coding	35	GC14M055366	1.51093	https://www.genecards.org/cgi-bin/carddisp.pl?gene=ATG14
OR51E2	Olfactory Receptor Family 51 Subfamily E Member 2	Protein Coding	32	GC11M004680	1.51093	https://www.genecards.org/cgi-bin/carddisp.pl?gene=OR51E2
MIR1207	MicroRNA 1207	RNA Gene	17	GC08P128049	1.51093	https://www.genecards.org/cgi-bin/carddisp.pl?gene=MIR1207
ANPEP	Alanyl Aminopeptidase, Membrane	Protein Coding	49	GC15M089784	1.50205	https://www.genecards.org/cgi-bin/carddisp.pl?gene=ANPEP
CXCL5	C-X-C Motif Chemokine Ligand 5	Protein Coding	40	GC04M073995	1.50205	https://www.genecards.org/cgi-bin/carddisp.pl?gene=CXCL5
MCUB	Mitochondrial Calcium Uniporter Dominant Negative Subunit Beta	Protein Coding	25	GC04P109561	1.47474	https://www.genecards.org/cgi-bin/carddisp.pl?gene=MCUB
ITGB3	Integrin Subunit Beta 3	Protein Coding	49	GC17P051053	1.461	https://www.genecards.org/cgi-bin/carddisp.pl?gene=ITGB3
SOCS3	Suppressor Of Cytokine Signaling 3	Protein Coding	42	GC17M078356	1.45067	https://www.genecards.org/cgi-bin/carddisp.pl?gene=SOCS3
CCL20	C-C Motif Chemokine Ligand 20	Protein Coding	42	GC02P227835	1.45067	https://www.genecards.org/cgi-bin/carddisp.pl?gene=CCL20
PSMD1	Proteasome 26S Subunit, Non-ATPase 1	Protein Coding	38	GC02P231056	1.45067	https://www.genecards.org/cgi-bin/carddisp.pl?gene=PSMD1
SLCO4C1	Solute Carrier Organic Anion Transporter Family Member 4C1	Protein Coding	37	GC05M102233	1.45067	https://www.genecards.org/cgi-bin/carddisp.pl?gene=SLCO4C1
UBC	Ubiquitin C	Protein Coding	41	GC12M124911	1.44695	https://www.genecards.org/cgi-bin/carddisp.pl?gene=UBC
RELA	RELA Proto-Oncogene, NF-KB Subunit	Protein Coding	50	GC11M065653	1.44128	https://www.genecards.org/cgi-bin/carddisp.pl?gene=RELA
KLRC1	Killer Cell Lectin Like Receptor C1	Protein Coding	41	GC12M019793	1.44128	https://www.genecards.org/cgi-bin/carddisp.pl?gene=KLRC1
ITGAM	Integrin Subunit Alpha M	Protein Coding	46	GC16P039480	1.42621	https://www.genecards.org/cgi-bin/carddisp.pl?gene=ITGAM
IL7R	Interleukin 7 Receptor	Protein Coding	45	GC05P035852	1.42621	https://www.genecards.org/cgi-bin/carddisp.pl?gene=IL7R
NLRP12	NLR Family Pyrin Domain Containing 12	Protein Coding	43	GC19M053793	1.42621	https://www.genecards.org/cgi-bin/carddisp.pl?gene=NLRP12
IRF9	Interferon Regulatory Factor 9	Protein Coding	43	GC14P024161	1.42621	https://www.genecards.org/cgi-bin/carddisp.pl?gene=IRF9
IGHMBP2	Immunoglobulin Mu DNA Binding Protein 2	Protein Coding	42	GC11P068903	1.42621	https://www.genecards.org/cgi-bin/carddisp.pl?gene=IGHMBP2
TK2	Thymidine Kinase 2	Protein Coding	41	GC16M066508	1.42621	https://www.genecards.org/cgi-bin/carddisp.pl?gene=TK2
TRIP4	Thyroid Hormone Receptor Interactor 4	Protein Coding	40	GC15P092226	1.42621	https://www.genecards.org/cgi-bin/carddisp.pl?gene=TRIP4
TOMM70	Translocase Of Outer Mitochondrial Membrane 70	Protein Coding	30	GC03M100364	1.42222	https://www.genecards.org/cgi-bin/carddisp.pl?gene=TOMM70
G3BP1	G3BP Stress Granule Assembly Factor 1	Protein Coding	39	GC05P151771	1.36834	https://www.genecards.org/cgi-bin/carddisp.pl?gene=G3BP1
G3BP2	G3BP Stress Granule Assembly Factor 2	Protein Coding	36	GC04M075642	1.36834	https://www.genecards.org/cgi-bin/carddisp.pl?gene=G3BP2
CXCR4	C-X-C Motif Chemokine Receptor 4	Protein Coding	50	GC02M136114	1.36595	https://www.genecards.org/cgi-bin/carddisp.pl?gene=CXCR4
CPT2	Carnitine Palmitoyltransferase 2	Protein Coding	49	GC01P053196	1.36595	https://www.genecards.org/cgi-bin/carddisp.pl?gene=CPT2
MAPT	Microtubule Associated Protein Tau	Protein Coding	49	GC17P045894	1.36595	https://www.genecards.org/cgi-bin/carddisp.pl?gene=MAPT
GAA	Alpha Glucosidase	Protein Coding	48	GC17P080101	1.36595	https://www.genecards.org/cgi-bin/carddisp.pl?gene=GAA
B2M	Beta-2-Microglobulin	Protein Coding	48	GC15P044711	1.36595	https://www.genecards.org/cgi-bin/carddisp.pl?gene=B2M
JUN	Jun Proto-Oncogene, AP-1 Transcription Factor Subunit	Protein Coding	47	GC01M058780	1.36595	https://www.genecards.org/cgi-bin/carddisp.pl?gene=JUN
HADHA	Hydroxyacyl-CoA Dehydrogenase Trifunctional Multienzyme Complex Subunit Alpha	Protein Coding	46	GC02M026190	1.36595	https://www.genecards.org/cgi-bin/carddisp.pl?gene=HADHA
FHL1	Four And A Half LIM Domains 1	Protein Coding	45	GC0XP136146	1.36595	https://www.genecards.org/cgi-bin/carddisp.pl?gene=FHL1
CD81	CD81 Molecule	Protein Coding	45	GC11P002505	1.36595	https://www.genecards.org/cgi-bin/carddisp.pl?gene=CD81
ACADVL	Acyl-CoA Dehydrogenase Very Long Chain	Protein Coding	45	GC17P007219	1.36595	https://www.genecards.org/cgi-bin/carddisp.pl?gene=ACADVL
APEX1	Apurinic/Apyrimidinic Endodeoxyribonuclease 1	Protein Coding	44	GC14P020455	1.36595	https://www.genecards.org/cgi-bin/carddisp.pl?gene=APEX1
EIF2S1	Eukaryotic Translation Initiation Factor 2 Subunit Alpha	Protein Coding	43	GC14P067359	1.36595	https://www.genecards.org/cgi-bin/carddisp.pl?gene=EIF2S1
ITIH4	Inter-Alpha-Trypsin Inhibitor Heavy Chain 4	Protein Coding	42	GC03M052812	1.36595	https://www.genecards.org/cgi-bin/carddisp.pl?gene=ITIH4
DHPS	Deoxyhypusine Synthase	Protein Coding	42	GC19M013460	1.36595	https://www.genecards.org/cgi-bin/carddisp.pl?gene=DHPS
MATR3	Matrin 3	Protein Coding	41	GC05P139274	1.36595	https://www.genecards.org/cgi-bin/carddisp.pl?gene=MATR3
FKRP	Fukutin Related Protein	Protein Coding	40	GC19P046746	1.36595	https://www.genecards.org/cgi-bin/carddisp.pl?gene=FKRP
LACTB	Lactamase Beta	Protein Coding	36	GC15P112676	1.36595	https://www.genecards.org/cgi-bin/carddisp.pl?gene=LACTB
TRMT10C	TRNA Methyltransferase 10C, Mitochondrial RNase P Subunit	Protein Coding	34	GC03P101561	1.36595	https://www.genecards.org/cgi-bin/carddisp.pl?gene=TRMT10C
MESD	Mesoderm Development LRP Chaperone	Protein Coding	34	GC15M080964	1.36595	https://www.genecards.org/cgi-bin/carddisp.pl?gene=MESD
UGT2A1	UDP Glucuronosyltransferase Family 2 Member A1 Complex Locus	Protein Coding	34	GC04M069588	1.34363	https://www.genecards.org/cgi-bin/carddisp.pl?gene=UGT2A1
UGT2A2	UDP Glucuronosyltransferase Family 2 Member A2	Protein Coding	30	GC04M069589	1.34363	https://www.genecards.org/cgi-bin/carddisp.pl?gene=UGT2A2
ANO6	Anoctamin 6	Protein Coding	41	GC12P045215	1.32943	https://www.genecards.org/cgi-bin/carddisp.pl?gene=ANO6
LDLRAD3	Low Density Lipoprotein Receptor Class A Domain Containing 3	Protein Coding	32	GC11P035943	1.32411	https://www.genecards.org/cgi-bin/carddisp.pl?gene=LDLRAD3
FASN	Fatty Acid Synthase	Protein Coding	48	GC17M082078	1.30518	https://www.genecards.org/cgi-bin/carddisp.pl?gene=FASN
PNPLA3	Patatin Like Phospholipase Domain Containing 3	Protein Coding	41	GC22P043923	1.30518	https://www.genecards.org/cgi-bin/carddisp.pl?gene=PNPLA3
CCL7	C-C Motif Chemokine Ligand 7	Protein Coding	41	GC17P034270	1.30518	https://www.genecards.org/cgi-bin/carddisp.pl?gene=CCL7
TNNI1	Troponin I1, Slow Skeletal Type	Protein Coding	39	GC01M201404	1.30518	https://www.genecards.org/cgi-bin/carddisp.pl?gene=TNNI1
PARP14	Poly(ADP-Ribose) Polymerase Family Member 14	Protein Coding	38	GC03P122680	1.30518	https://www.genecards.org/cgi-bin/carddisp.pl?gene=PARP14
ERVFRD-1	Endogenous Retrovirus Group FRD Member 1, Envelope	Protein Coding	32	GC06M011103	1.30518	https://www.genecards.org/cgi-bin/carddisp.pl?gene=ERVFRD-1
MIR320A	MicroRNA 320a	RNA Gene	21	GC08M022262	1.30518	https://www.genecards.org/cgi-bin/carddisp.pl?gene=MIR320A
MIR451A	MicroRNA 451a	RNA Gene	19	GC17M028861	1.30518	https://www.genecards.org/cgi-bin/carddisp.pl?gene=MIR451A
MIR320C1	MicroRNA 320c-1	RNA Gene	16	GC18P021683	1.30518	https://www.genecards.org/cgi-bin/carddisp.pl?gene=MIR320C1
MIR320B1	MicroRNA 320b-1	RNA Gene	15	GC01P116671	1.30518	https://www.genecards.org/cgi-bin/carddisp.pl?gene=MIR320B1
SCARB1	Scavenger Receptor Class B Member 1	Protein Coding	46	GC12M124776	1.28739	https://www.genecards.org/cgi-bin/carddisp.pl?gene=SCARB1
CFTR	CF Transmembrane Conductance Regulator	Protein Coding	50	GC07P117287	1.26131	https://www.genecards.org/cgi-bin/carddisp.pl?gene=CFTR
CD40LG	CD40 Ligand	Protein Coding	47	GC0XP136649	1.26131	https://www.genecards.org/cgi-bin/carddisp.pl?gene=CD40LG
PIK3C2A	Phosphatidylinositol-4-Phosphate 3-Kinase Catalytic Subunit Type 2 Alpha	Protein Coding	46	GC11M017506	1.26131	https://www.genecards.org/cgi-bin/carddisp.pl?gene=PIK3C2A
IL5	Interleukin 5	Protein Coding	44	GC05M132541	1.26131	https://www.genecards.org/cgi-bin/carddisp.pl?gene=IL5
SFTPC	Surfactant Protein C	Protein Coding	42	GC08P022156	1.26131	https://www.genecards.org/cgi-bin/carddisp.pl?gene=SFTPC
CCL11	C-C Motif Chemokine Ligand 11	Protein Coding	42	GC17P034285	1.26131	https://www.genecards.org/cgi-bin/carddisp.pl?gene=CCL11
H2AC18	H2A Clustered Histone 18	Protein Coding	26	GC01M151368	1.26131	https://www.genecards.org/cgi-bin/carddisp.pl?gene=H2AC18
RAP1GDS1	Rap1 GTPase-GDP Dissociation Stimulator 1	Protein Coding	41	GC04P098261	1.2593	https://www.genecards.org/cgi-bin/carddisp.pl?gene=RAP1GDS1
DCTN1	Dynactin Subunit 1	Protein Coding	45	GC02M074361	1.24825	https://www.genecards.org/cgi-bin/carddisp.pl?gene=DCTN1
NUP98	Nucleoporin 98 And 96 Precursor	Protein Coding	43	GC11M003671	1.24133	https://www.genecards.org/cgi-bin/carddisp.pl?gene=NUP98
KAT2B	Lysine Acetyltransferase 2B	Protein Coding	46	GC03P020043	1.22046	https://www.genecards.org/cgi-bin/carddisp.pl?gene=KAT2B
MMP12	Matrix Metallopeptidase 12	Protein Coding	45	GC11M102862	1.22046	https://www.genecards.org/cgi-bin/carddisp.pl?gene=MMP12
GIGYF2	GRB10 Interacting GYF Protein 2	Protein Coding	40	GC02P232698	1.18173	https://www.genecards.org/cgi-bin/carddisp.pl?gene=GIGYF2
REEP5	Receptor Accessory Protein 5	Protein Coding	40	GC05M112876	1.18173	https://www.genecards.org/cgi-bin/carddisp.pl?gene=REEP5
RAE1	Ribonucleic Acid Export 1	Protein Coding	40	GC20P057351	1.18173	https://www.genecards.org/cgi-bin/carddisp.pl?gene=RAE1
RAB14	RAB14, Member RAS Oncogene Family	Protein Coding	39	GC09M121178	1.18173	https://www.genecards.org/cgi-bin/carddisp.pl?gene=RAB14
[truncated: 4,064 more rows]

## Sheet: Relevance score>12
Gene Symbol	Description	Category	Gifts	GC Id	Relevance score	GeneCards Link
[truncated: 6 more rows]
